# Supplementary material for: Enantioselective copper-catalyzed B–H bond insertion reaction of α-diazo phosphonates to access chiral α-boryl phosphonates
Source: Royal Society of Chemistry journal article supplement (doi:10.1039/d4sc01271b), 2024-01-01

# Enantioselective copper-catalyzed B-H bond insertion reaction of $\alpha$ -diazo phosphonates to access chiral $\alpha$ -boryl phosphonates

Longlong Li, Kui Yu, Hejun An, Xinping Cai, Qiuling Song\*

*Key Laboratory of Molecule Synthesis and Function Discovery, Fujian Province University, College of Chemistry at Fuzhou University, Fuzhou, Fujian, 350108, China*

## Table of Content

|                                                                                                         |            |
|---------------------------------------------------------------------------------------------------------|------------|
| <b>1. Experimental studies</b> .....                                                                    | <b>S2</b>  |
| <b>1.1 General information</b> .....                                                                    | <b>S2</b>  |
| <b>1.2 General procedure for preparation of <math>\alpha</math>-diazo phosphonates</b> .....            | <b>S2</b>  |
| <b>1.3 General procedure C for preparation of phosphine-borane adducts</b> .....                        | <b>S16</b> |
| <b>1.4 General procedure D for the synthesis of chiral <math>\alpha</math>-boryl phosphonates</b> ..... | <b>S19</b> |
| <b>1.5 Further synthetic transformation</b> .....                                                       | <b>S81</b> |
| <b>1.6 Mechanism study of the B-H bond insertion reaction</b> .....                                     | <b>S87</b> |
| <b>1.7 Crystal structure of compound 3aa</b> .....                                                      | <b>S89</b> |
| <b>2. References</b> .....                                                                              | <b>S91</b> |
| <b>3. NMR spectra</b> .....                                                                             | <b>S92</b> |

# 1. Experimental studies

## 1.1 General information

All experiments were conducted with a schlenk tube. Flash column chromatography was performed over silica gel (200-300 mesh).  $^1\text{H}$  NMR and  $^{13}\text{C}$  NMR spectra were recorded at ambient temperature using Bruker 400M spectrometers and JEOL 500M spectrometers, chemical shifts (in ppm) were referenced to  $\text{CDCl}_3$  ( $\delta = 7.26$  ppm) as internal standards.  $^{13}\text{C}$  NMR spectra were obtained by using the same NMR spectrometers and were calibrated with  $\text{CDCl}_3$  ( $\delta = 77.0$  ppm). Data for  $^1\text{H}$  NMR are recorded as following abbreviations: multiplicity (s = singlet, d = doublet, t = triplet, q = quarter, m = multiplet), coupling constant (J, Hz). High resolution mass spectroscopy (HRMS) analyses were performed at an Exactive Plus (Thermo Scientific) or Agilent Mass Spectrometer. Unless otherwise noted, materials obtained from commercial suppliers were used without further purification.

## 1.2 General procedure for preparation of $\alpha$ -diazo phosphonates

### General procedure A: Synthesis of $\alpha$ -diazo phosphonates (1a-1p, 1r-1C):

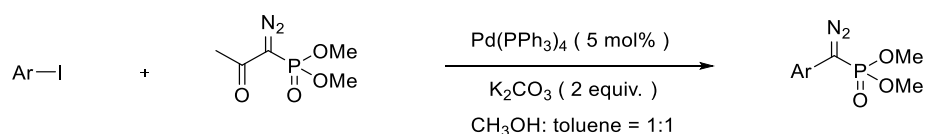

$\text{Pd}(\text{PPh}_3)_4$  (0.29 g, 5 mol%),  $\text{K}_2\text{CO}_3$  (1.38 g, 10.0 mmol) were suspended in methanol (10 mL) and toluene (10 mL) in a 100 mL flask under argon. Aryl iodide (5.0 mmol) and dimethyl (1-diazo-2-oxopropyl)phosphonate (1.25 g, 1.3 equiv) was then added, and the resulting solution was stirred at room temperature for 12 h. Then, this reaction was quenched by 20 mL  $\text{H}_2\text{O}$ , extracted with ethyl acetate, dried over  $\text{Na}_2\text{SO}_4$ , and evaporated in vacuo to remove the volatile materials. The crude residue was purified by column chromatography (silica gel, petroleum ether:ethyl acetate = 3:1) to afford the final products.<sup>1</sup>

### General procedure B: Synthesis of $\alpha$ -diazo phosphonates (1q-1p, 4a-4c):

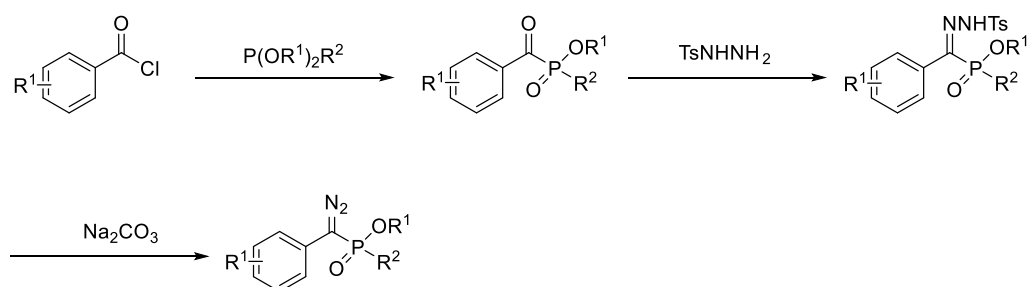

To a 50 mL flask was added acid chloride (10 mmol, 1.0 equiv) under argon at 0 °C. Then P(OR<sup>1</sup>)<sub>2</sub>R<sup>2</sup> (10 mmol, 1.0 equiv) was added dropwise and the mixture was stirred at room temperature for 4 h. The resulting yellow oil **A** was used in the next step without further purification.

A suspension of TsNHNH<sub>2</sub> (1.86 g, 10 mmol, 1.0 equiv) in THF (10 mL) in a 25 mL flask was chilled to 0 °C and then concentrated HCl (0.42 mL, 5.0 mmol, 0.5 equiv) was added. The resulting solution was stirred at 0 °C while the resulting yellow oil **A** was added dropwise. The flask was stoppered and the mixture was allowed to warm to room temperature and stirred for 12 h. The organic layers were concentrated under reduced pressure to yield the crude product **B** (the corresponding N-tosylhydrazone).

Na<sub>2</sub>CO<sub>3</sub> (2.4 g, 22 mmol, 2.2 equiv) was added to the corresponding N-tosylhydrazone **B** without further purification. Then water (25 mL) and Et<sub>2</sub>O (5 mL) was added and the mixture was stirred at room temperature for 24 h. When the stirring was complete, the mixture was extracted with ethyl acetate three times, washed with water and brine, dried over Na<sub>2</sub>SO<sub>4</sub> and concentrated under reduced pressure. The crude residue was purified by chromatography (silica gel, PE: EtOAc =3:1), to give final product.<sup>3</sup>

#### Dimethyl (diazo(phenyl)methyl)phosphonate (**1a**)

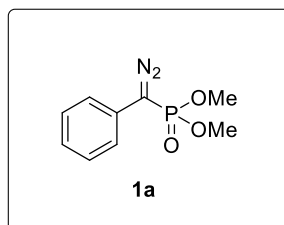

Following the procedure A on 5 mmol scale, orange oil, yield: 62% (700.6 mg), column chromatography (silica gel, PE: EtOAc = 3:1, v/v). Spectroscopic data are in agreement with those previously reported.<sup>1</sup>

<sup>1</sup>H NMR (400 MHz, Chloroform-*d*) δ 7.38 – 7.32 (m, 2H), 7.18 – 7.11 (m, 3H), 3.80 (d, *J* = 11.9 Hz, 6H).

#### Dimethyl ((4-chlorophenyl)(diazo)methyl)phosphonate (**1b**)

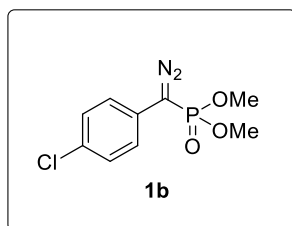

Following the procedure A on 5 mmol scale, orange oil, yield: 60% (781.1 mg), column chromatography (silica gel, PE: EtOAc = 3:1, v/v). Spectroscopic data are in agreement with those previously reported.<sup>2</sup>

<sup>1</sup>H NMR (500 MHz, Chloroform-*d*)  $\delta$  7.33 – 7.29 (m, 2H), 7.10 – 7.06 (m, 2H), 3.80 (d,  $J$  = 11.9 Hz, 6H).

**Dimethyl (diazo(4-(hydroxymethyl)phenyl)methyl)phosphonate (1c)**

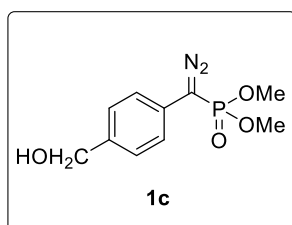

Following the procedure A on 5 mmol scale, orange oil, yield: 55% (704.0 mg), column chromatography (silica gel, PE: EtOAc = 3:1, v/v). Spectroscopic data are in agreement with those previously reported.<sup>2</sup>

<sup>1</sup>H NMR (500 MHz, Chloroform-*d*)  $\delta$  7.36 – 7.31 (m, 2H), 7.15 – 7.07 (m, 2H), 4.62 (s, 2H), 3.77 (d,  $J$  = 11.9 Hz, 6H), 2.68 (s, 1H).

**Dimethyl (diazo(4-methoxyphenyl)methyl)phosphonate (1d)**

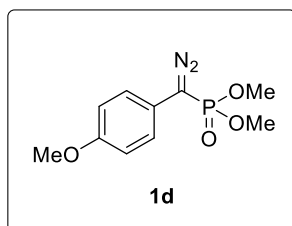

Following the procedure A on 5 mmol scale, orange oil, 53% (678.2 mg), column chromatography (silica gel, PE: EtOAc = 3:1, v/v). Spectroscopic data are in agreement with those previously reported.<sup>2</sup>

<sup>1</sup>H NMR (500 MHz, Chloroform-*d*)  $\delta$  7.09 – 7.05 (m, 2H), 6.92 – 6.87 (m, 2H), 3.79 – 3.75 (m, 9H).

**Dimethyl (diazo(p-tolyl)methyl)phosphonate (1e)**

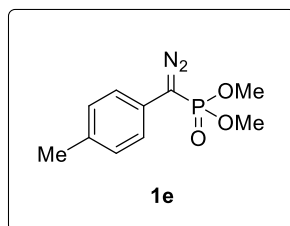

Following the procedure A on 5 mmol scale, orange oil, yield: 67% (803.9 mg), column chromatography (silica gel, PE: EtOAc = 3:1, v/v). Spectroscopic data are in agreement with those previously reported.<sup>2</sup>

<sup>1</sup>H NMR (500 MHz, Chloroform-*d*) δ 7.19 – 7.15 (m, 2H), 7.07 – 7.03 (m, 2H), 3.80 (d, *J* = 12.0 Hz, 6H), 2.32 (s, 3H).

**Dimethyl (diazo(4-(methylthio)phenyl)methyl)phosphonate (1f)**

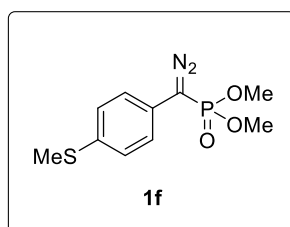

Following the procedure A on 5 mmol scale, orange oil, yield: 31% (421.6 mg), column chromatography (silica gel, PE: EtOAc = 3:1, v/v).

<sup>1</sup>H NMR (500 MHz, Chloroform-*d*) δ 7.28 – 7.24 (m, 2H), 7.10 – 7.07 (m, 2H), 3.81 (d, *J* = 12.0 Hz, 6H), 2.47 (s, 3H).

<sup>13</sup>C NMR (126 MHz, Chloroform-*d*) δ 135.4, 127.9, 123.1 (d, *J* = 4.6 Hz), 122.9 (d, *J* = 9.7 Hz), 53.1 (d, *J* = 5.2 Hz), 16.1.

<sup>31</sup>P NMR (202 MHz, Chloroform-*d*) δ 21.41.

**Dimethyl (diazo(4-nitrophenyl)methyl)phosphonate (1g)**

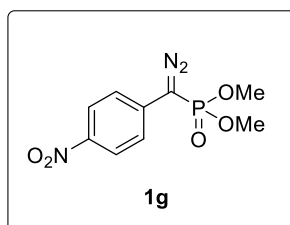

Following the procedure A on 5 mmol scale, orange oil, yield: 74% (1.0 g), column chromatography (silica gel, PE: EtOAc = 3:1, v/v). Spectroscopic data are in agreement with those previously reported.<sup>1</sup>

**<sup>1</sup>H NMR (500 MHz, Chloroform-*d*)**  $\delta$  8.23 – 8.19 (m, 2H), 7.30 – 7.26 (m, 2H), 3.86 (d,  $J$  = 11.9 Hz, 6H).

**Methyl-4-(diazo(dimethoxyphosphoryl)methyl)benzoate (1h)**

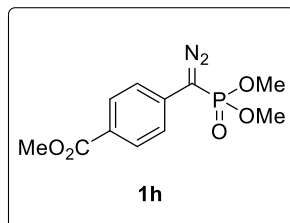

Following the procedure A on 5 mmol scale, orange oil, yield: 77 % (1.10 g), column chromatography (silica gel, PE: EtOAc = 3:1, v/v). Spectroscopic data are in agreement with those previously reported.<sup>2</sup>

**<sup>1</sup>H NMR (500 MHz, Chloroform-*d*)**  $\delta$  7.99 – 7.96 (m, 2H), 7.19 – 7.15 (m, 2H), 3.87 (s, 3H), 3.80 (d,  $J$  = 12.0 Hz, 6H).

**Dimethyl (diazo(4-fluorophenyl)methyl)phosphonate (1i)**

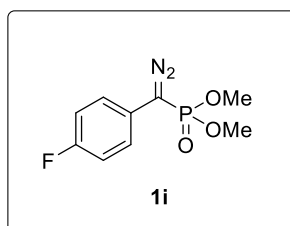

Following the procedure A on 5 mmol scale, orange oil, yield: 65% (793.7 mg), column chromatography (silica gel, PE: EtOAc = 3:1, v/v). Spectroscopic data are in agreement with those previously reported.<sup>2</sup>

**<sup>1</sup>H NMR (500 MHz, Chloroform-*d*)**  $\delta$  7.15 – 7.10 (m, 2H), 7.08 – 7.03 (m, 2H), 3.80 (d,  $J$  = 11.9 Hz, 6H).

**Dimethyl ((4-bromophenyl)(diazo)methyl)phosphonate (1j)**

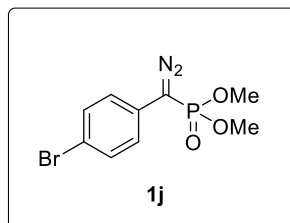

Following the procedure A on 5 mmol scale, orange oil, yield: 63% (961.1 mg), column chromatography (silica gel, PE: EtOAc = 3:1, v/v). Spectroscopic data are in agreement with those

previously reported.<sup>2</sup>

**<sup>1</sup>H NMR (500 MHz, Chloroform-*d*)**  $\delta$  7.46 – 7.43 (m, 2H), 7.03 – 6.99 (m, 2H), 3.79 (d,  $J$  = 11.9 Hz, 6H).

**Dimethyl (diazo(4-(trifluoromethyl)phenyl)methyl)phosphonate (1k)**

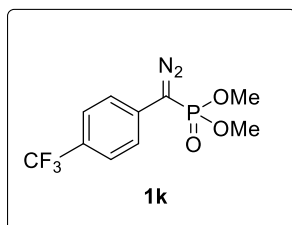

Following the procedure A on 5 mmol scale, orange oil, yield: 68% (1.0 g), column chromatography (silica gel, PE: EtOAc = 3:1, v/v).

**<sup>1</sup>H NMR (400 MHz, Chloroform-*d*)**  $\delta$  7.57 (d,  $J$  = 8.3 Hz, 2H), 7.24 (d,  $J$  = 8.3 Hz, 2H), 3.81 (d,  $J$  = 11.9 Hz, 6H).

**<sup>13</sup>C NMR (101 MHz, Chloroform-*d*)**  $\delta$  131.2 (d,  $J$  = 9.9 Hz), 127.1 (q,  $J$  = 32.8 Hz), 126.1 (q,  $J$  = 3.9 Hz), 124.0 (q,  $J$  = 271.6 Hz), 122.3 (d,  $J$  = 4.5 Hz), 53.2 (d,  $J$  = 5.1 Hz).

**<sup>31</sup>P NMR (162 MHz, Chloroform-*d*)**  $\delta$  19.19.

**<sup>19</sup>F NMR (376 MHz, Chloroform-*d*)**  $\delta$  -62.48.

**Dimethyl ([1,1'-biphenyl]-4-yl(diazo)methyl)phosphonate (1l)**

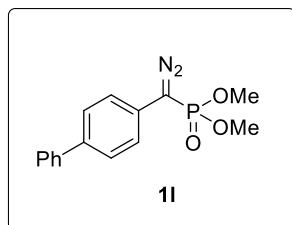

Following the procedure A on 5 mmol scale, orange solid, yield: 47 % (709.2 mg), column chromatography (silica gel, PE: EtOAc = 3:1, v/v). Spectroscopic data are in agreement with those previously reported.<sup>2</sup>

**<sup>1</sup>H NMR (500 MHz, Chloroform-*d*)**  $\delta$  7.62 – 7.56 (m, 4H), 7.46 – 7.42 (m, 2H), 7.37 – 7.33 (m, 1H), 7.25 – 7.22 (m, 2H), 3.84 (d,  $J$  = 11.9 Hz, 6H).

**Dimethyl ((4-(benzyloxy)phenyl)(diazo)methyl)phosphonate (1m)**

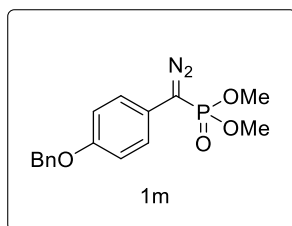

Following the procedure A on 5 mmol scale, orange solid (mp: 41.3 – 42.5 °C), yield: 34% (564.9 mg), column chromatography (silica gel, PE: EtOAc = 3:1, v/v).

**<sup>1</sup>H NMR (400 MHz, Chloroform-*d*)**  $\delta$  7.45 – 7.30 (m, 5H), 7.13 – 7.07 (m, 2H), 7.02 – 6.97 (m, 2H), 5.05 (s, 2H), 3.80 (d,  $J$  = 11.9 Hz, 6H).

**<sup>13</sup>C NMR (101 MHz, Chloroform-*d*)**  $\delta$  156.8, 136.7, 128.5, 127.9, 127.3, 124.3 (d,  $J$  = 4.4 Hz), 117.7 (d,  $J$  = 9.6 Hz), 116.0, 70.0, 53.0 (d,  $J$  = 5.1 Hz).

**<sup>31</sup>P NMR (162 MHz, Chloroform-*d*)**  $\delta$  21.57.

**Dimethyl ((4-cyanophenyl)methyl)phosphonate (1n)**

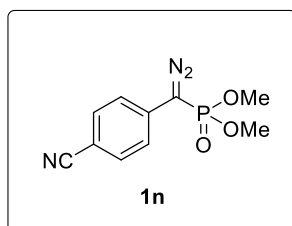

Following the procedure A on 5 mmol scale, orange oil, yield: 64% (803.8 mg), column chromatography (silica gel, PE: EtOAc = 3:1, v/v). Spectroscopic data are in agreement with those previously reported.<sup>3</sup>

**<sup>1</sup>H NMR (500 MHz, Chloroform-*d*)**  $\delta$  7.62 – 7.59 (m, 2H), 7.24 – 7.21 (m, 2H), 3.82 (d,  $J$  = 11.9 Hz, 6H).

**Dimethyl (diazo(3-methoxyphenyl)methyl)phosphonate (1o)**

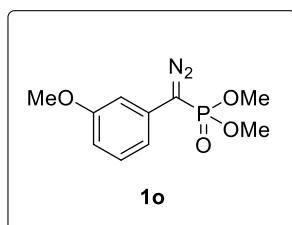

Following the procedure A on 5 mmol scale, orange oil, yield: 67% (858.7 mg), column chromatography (silica gel, PE: EtOAc = 3:1, v/v). Spectroscopic data are in agreement with those previously reported.<sup>2</sup>



**<sup>1</sup>H NMR (500 MHz, Chloroform-*d*)**  $\delta$  7.25 (t,  $J$  = 8.0 Hz, 1H), 6.75 – 6.71 (m, 1H), 6.70 – 6.66 (m, 2H), 3.81 – 3.77 (m, 9H).

**Methyl 3-(diazo(dimethoxyphosphoryl)methyl)benzoate (1p)**

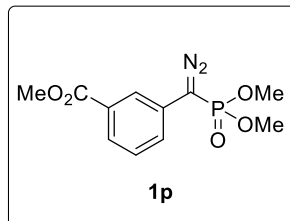

Following the procedure A on 5 mmol scale, red oil, yield: 62% (880.6 mg), column chromatography (silica gel, PE: EtOAc = 3:1, v/v).

**<sup>1</sup>H NMR (500 MHz, Chloroform-*d*)**  $\delta$  7.80 – 7.76 (m, 2H), 7.41 (t,  $J$  = 7.2 Hz, 1H), 7.37 – 7.34 (m, 1H), 3.90 (s, 3H), 3.80 (d,  $J$  = 11.9 Hz, 6H).

**<sup>13</sup>C NMR (126 MHz, Chloroform-*d*)**  $\delta$  166.3, 131.1, 129.2, 127.2 (d,  $J$  = 9.8 Hz), 126.6 (d,  $J$  = 3.7 Hz), 126.1, 123.1 (d,  $J$  = 5.1 Hz), 53.1 (d,  $J$  = 5.1 Hz), 52.1.

**<sup>31</sup>P NMR (202 MHz, Chloroform-*d*)**  $\delta$  20.6.

**Dimethyl (diazo(3-iodophenyl)methyl)phosphonate (1q)**

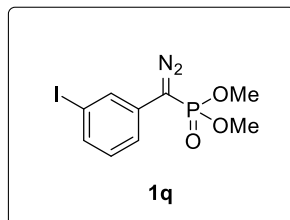

Following the procedure B on 10 mmol scale, orange oil, yield: 50% (1.73 g), column chromatography (silica gel, PE: EtOAc = 3:1, v/v).

**<sup>1</sup>H NMR (400 MHz, Chloroform-*d*)**  $\delta$  7.49 – 7.39 (m, 2H), 7.14 – 7.00 (m, 2H), 3.79 (dd,  $J$  = 11.9, 3.7 Hz, 6H).

**<sup>13</sup>C NMR (101 MHz, Chloroform-*d*)**  $\delta$  134.1, 130.8 (d,  $J$  = 4.8 Hz), 130.6, 128.9 (d,  $J$  = 9.8 Hz), 121.7 (d,  $J$  = 4.1 Hz), 95.0, 53.2 (d,  $J$  = 5.1 Hz).

**<sup>31</sup>P NMR (162 MHz, Chloroform-*d*)**  $\delta$  19.65.

**Dimethyl (diazo(2-fluorophenyl)methyl)phosphonate (1r)**

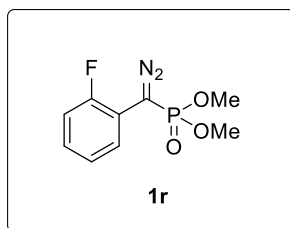

Following the procedure B on 10 mmol scale, orange oil, yield: 70% (1.71 g), column chromatography (silica gel, PE: EtOAc = 3:1, v/v). Spectroscopic data are in agreement with those previously reported.<sup>3</sup>

**<sup>1</sup>H NMR (500 MHz, Chloroform-*d*)**  $\delta$  7.31 – 7.26 (m, 1H), 7.18 – 7.13 (m, 1H), 7.12 – 7.07 (m, 1H), 7.07 – 7.01 (m, 1H), 3.79 (m, 6H).

**Dimethyl ((3-chloro-4-fluorophenyl)(diazo)methyl)phosphonate (1s)**

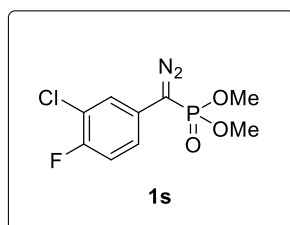

Following the procedure A on 5 mmol scale, orange oil, yield: 40% (558.2 mg), column chromatography (silica gel, PE: EtOAc = 3:1, v/v).

**<sup>1</sup>H NMR (400 MHz, Chloroform-*d*)**  $\delta$  7.15 – 7.02 (m, 2H), 7.00 – 6.91 (m, 1H), 3.74 (d, *J* = 12.2 Hz, 6H).

**<sup>13</sup>C NMR (101 MHz, Chloroform-*d*)**  $\delta$  155.6 (d, *J* = 248.1 Hz), 124.3 (d, *J* = 4.4 Hz), 123.7 (dd, *J* = 9.8, 3.8 Hz), 122.2 (dd, *J* = 7.0, 4.4 Hz), 121.9 (d, *J* = 18.6 Hz), 117.2 (d, *J* = 21.7 Hz), 53.1 (d, *J* = 5.0 Hz).

**<sup>31</sup>P NMR (162 MHz, Chloroform-*d*)**  $\delta$  19.49.

**<sup>19</sup>F NMR (376 MHz, Chloroform-*d*)**  $\delta$  -119.61.

**Dimethyl (diazo(4-methyl-3-nitrophenyl)methyl)phosphonate (1t)**

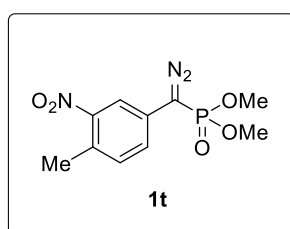

Following the procedure A on 5 mmol scale, orange solid (mp: 67.5 – 68.6 °C), yield: 38% (541.9

mg), column chromatography (silica gel, PE: EtOAc = 3:1, v/v).

**<sup>1</sup>H NMR (400 MHz, Chloroform-*d*)**  $\delta$  7.74 (d,  $J$  = 2.0 Hz, 1H), 7.36 – 7.29 (m, 2H), 3.85 (d,  $J$  = 11.9 Hz, 6H), 2.56 (s, 3H).

**<sup>13</sup>C NMR (101 MHz, Chloroform-*d*)**  $\delta$  149.8, 133.6, 130.0, 126.5 (d,  $J$  = 4.2 Hz), 126.4 (d,  $J$  = 10.0 Hz), 118.1 (d,  $J$  = 4.9 Hz), 53.3 (d,  $J$  = 5.2 Hz), 19.8.

**<sup>31</sup>P NMR (162 MHz, Chloroform-*d*)**  $\delta$  19.00.

**Dimethyl (diazo(3,5-dimethoxyphenyl)methyl)phosphonate (1u)**

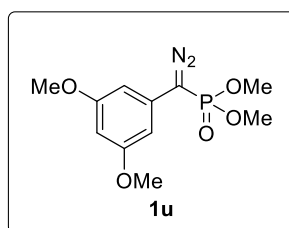

Following the procedure A on 5 mmol scale, orange oil. yield: 53% (753.6 mg), column chromatography (silica gel, PE: EtOAc = 3:1, v/v).

**<sup>1</sup>H NMR (500 MHz, Chloroform-*d*)**  $\delta$  6.28 (d,  $J$  = 2.1 Hz, 2H), 6.22 (t,  $J$  = 2.2 Hz, 1H), 3.77 (d,  $J$  = 12.0 Hz, 6H), 3.74 (s, 6H).

**<sup>13</sup>C NMR (101 MHz, Chloroform-*d*)**  $\delta$  161.3, 128.4 (d,  $J$  = 9.6 Hz), 100.9 (d,  $J$  = 4.6 Hz), 97.0, 55.1, 53.0 (d,  $J$  = 5.0 Hz).

**<sup>31</sup>P NMR (162 MHz, Chloroform-*d*)**  $\delta$  20.55.

**Dimethyl (diazo(9H-fluoren-2-yl)methyl)phosphonate (1v)**

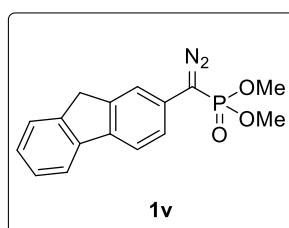

Following the procedure A on 5 mmol scale, red solid (mp: 88.0 – 88.9 °C), yield: 55% (863.3 mg), column chromatography (silica gel, PE: EtOAc = 3:1, v/v).

**<sup>1</sup>H NMR (500 MHz, Chloroform-*d*)**  $\delta$  7.76 – 7.72 (m, 2H), 7.54 – 7.50 (m, 1H), 7.38 – 7.34 (m, 2H), 7.29 (td,  $J$  = 7.4, 1.2 Hz, 1H), 7.17 (dd,  $J$  = 8.2, 1.8 Hz, 1H), 3.88 (s, 2H), 3.84 (d,  $J$  = 12.0 Hz, 6H).

**<sup>13</sup>C NMR (126 MHz, Chloroform-*d*)**  $\delta$  143.6 (d,  $J$  = 219.0 Hz), 140.1 (d,  $J$  = 202.8 Hz), 126.7 (d,  $J$  = 12.1 Hz), 124.9, 124.1 (d,  $J$  = 9.6 Hz), 121.3 (d,  $J$  = 4.7 Hz), 120.6, 119.6, 119.2 (d,  $J$  = 4.5 Hz), 53.1 (d,

$J = 5.0$  Hz), 36.8.

$^{31}\text{P}$  NMR (202 MHz, Chloroform-*d*)  $\delta$  21.84.

**Dimethyl (diazo(1H-indol-5-yl)methyl)phosphonate (1w)**

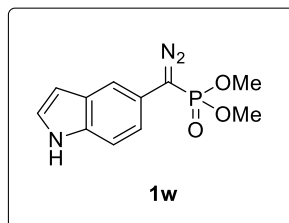

Following the procedure A on 5 mmol scale, red oil, yield: 42% (448 mg), column chromatography (silica gel, PE: EtOAc = 3:1, v/v).

$^1\text{H}$  NMR (400 MHz, Chloroform-*d*)  $\delta$  8.67 (s, 1H), 7.48 (s, 1H), 7.40 (d,  $J = 8.6$  Hz, 1H), 7.21 (t,  $J = 2.8$  Hz, 1H), 7.01 (dd,  $J = 8.6, 1.9$  Hz, 1H), 6.53 – 6.48 (m, 1H), 3.82 (d,  $J = 11.9$  Hz, 6H).

$^{13}\text{C}$  NMR (101 MHz, Chloroform-*d*)  $\delta$  134.3, 128.8, 125.4, 117.8 (d,  $J = 4.5$  Hz), 116.2 (d,  $J = 9.0$  Hz), 115.6 (d,  $J = 4.2$  Hz), 112.2, 102.1 (d,  $J = 1.9$  Hz), 53.1 (d,  $J = 5.0$  Hz).

$^{31}\text{P}$  NMR (162 MHz, Chloroform-*d*)  $\delta$  22.8.

**Dimethyl (benzo[d][1,3]dioxol-5-yl(diazo)methyl)phosphonate (1x)**

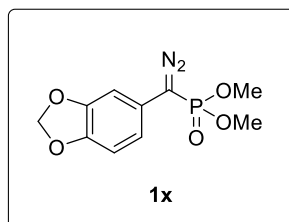

Following the procedure A on 5 mmol scale, red solid (mp: 68.2 – 68.8 °C), yield: 33% (446 mg), column chromatography (silica gel, PE: EtOAc = 3:1, v/v).

$^1\text{H}$  NMR (400 MHz, Chloroform-*d*)  $\delta$  6.78 (d,  $J = 8.2$  Hz, 1H), 6.66 (d,  $J = 2.0$  Hz, 1H), 6.60 (d,  $J = 8.2$  Hz, 1H), 5.92 (s, 2H), 3.77 (d,  $J = 11.7$  Hz, 6H).

$^{13}\text{C}$  NMR (101 MHz, Chloroform-*d*)  $\delta$  148.6, 145.7, 119.1 (d,  $J = 9.6$  Hz), 116.3 (d,  $J = 4.8$  Hz), 109.1, 104.0 (d,  $J = 4.4$  Hz), 101.2, 53.0 (d,  $J = 5.1$  Hz).

$^{31}\text{P}$  NMR (162 MHz, Chloroform-*d*)  $\delta$  21.17.

**Dimethyl (diazo(dibenzo[b,d]furan-1-yl)methyl)phosphonate (1y)**

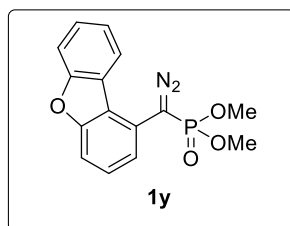

Following the procedure A on 5 mmol scale, orange oil, yield: 65% (1.02 g), column chromatography (silica gel, PE: EtOAc = 3:1, v/v).

**<sup>1</sup>H NMR (400 MHz, Chloroform-*d*)**  $\delta$  7.89 (d,  $J$  = 7.4 Hz, 1H), 7.62 (d,  $J$  = 8.0 Hz, 1H), 7.58 – 7.41 (m, 5H), 3.82 (d,  $J$  = 11.8 Hz, 6H).

**<sup>13</sup>C NMR (101 MHz, Chloroform-*d*)**  $\delta$  156.6, 156.3, 127.6, 127.5, 124.1, 123.3, 122.5, 122.4, 119.8, 119.7, 111.6, 111.5, 53.3 (d,  $J$  = 5.5 Hz).

**<sup>31</sup>P NMR (162 MHz, Chloroform-*d*)**  $\delta$  20.79.

**Dimethyl (diazo(dibenzo[b,d]thiophen-4-yl)methyl)phosphonate (1z)**

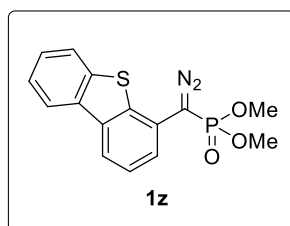

Following the procedure A on 5 mmol scale, orange oil, yield: 28% (646.3 mg), column chromatography (silica gel, PE: EtOAc = 3:1, v/v).

**<sup>1</sup>H NMR (400 MHz, Chloroform-*d*)**  $\delta$  8.20 – 8.13 (m, 1H), 8.14 – 8.07 (m, 1H), 7.93 – 7.85 (m, 1H), 7.55 – 7.46 (m, 4H), 3.83 (d,  $J$  = 11.9 Hz, 6H).

**<sup>13</sup>C NMR (101 MHz, Chloroform-*d*)**  $\delta$  138.6, 138.3 (d,  $J$  = 6.4 Hz), 136.8, 135.5, 127.3, 126.7, 125.5, 124.8, 122.8, 121.8, 121.0, 120.0 (d,  $J$  = 9.7 Hz), 53.4 (d,  $J$  = 5.3 Hz).

**<sup>31</sup>P NMR (162 MHz, Chloroform-*d*)**  $\delta$  20.89.

**Dimethyl (diazo(phenanthren-9-yl)methyl)phosphonate (1A)**

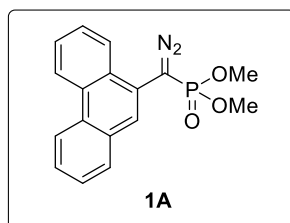

Following the procedure A on 5 mmol scale, orange oil, yield: 58% (946.3 mg), column

chromatography (silica gel, PE: EtOAc = 3:1, v/v).

**<sup>1</sup>H NMR (400 MHz, Chloroform-*d*)**  $\delta$  8.80 – 8.73 (m, 1H), 8.67 (d,  $J$  = 8.3 Hz, 1H), 8.17 – 8.08 (m, 1H), 7.95 (s, 1H), 7.90 (d,  $J$  = 7.8 Hz, 1H), 7.75 – 7.66 (m, 3H), 7.62 (t,  $J$  = 7.4 Hz, 1H), 3.83 (d,  $J$  = 11.7 Hz, 6H).

**<sup>13</sup>C NMR (101 MHz, Chloroform-*d*)**  $\delta$  131.3, 131.1, 130.7 (d,  $J$  = 2.6 Hz), 130.4, 130.2 (d,  $J$  = 4.2 Hz), 128.9, 127.5, 127.3, 127.0 (d,  $J$  = 1.9 Hz), 124.6, 123.5, 122.5, 120.7 (d,  $J$  = 8.2 Hz), 53.4 (d,  $J$  = 5.8 Hz).

**<sup>31</sup>P NMR (202 MHz, Chloroform-*d*)**  $\delta$  22.57.

**Dimethyl (diazo(naphthalen-2-yl)methyl)phosphonate (1B)**

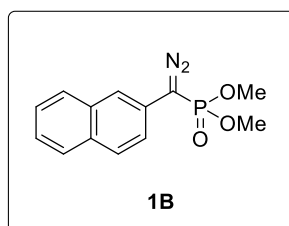

Following the procedure A on 5 mmol scale, orange oil, yield: 45% (620.8 mg), column chromatography (silica gel, PE: EtOAc = 3:1, v/v).

**<sup>1</sup>H NMR (400 MHz, Chloroform-*d*)**  $\delta$  7.84 (d,  $J$  = 8.7 Hz, 1H), 7.78 (t,  $J$  = 8.8 Hz, 2H), 7.59 (d,  $J$  = 2.0 Hz, 1H), 7.51 – 7.45 (m, 1H), 7.45 – 7.40 (m, 1H), 7.28 (dd,  $J$  = 8.7, 2.1 Hz, 1H), 3.85 (d,  $J$  = 12.0 Hz, 6H).

**<sup>13</sup>C NMR (101 MHz, Chloroform-*d*)**  $\delta$  133.7, 131.1, 129.1, 127.6, 127.2, 126.7, 125.5, 123.4 (d,  $J$  = 9.5 Hz), 120.9 (d,  $J$  = 5.0 Hz), 120.6 (d,  $J$  = 4.1 Hz), 53.1 (d,  $J$  = 5.1 Hz), 50.2 (d,  $J$  = 227.8 Hz).

**<sup>31</sup>P NMR (162 MHz, Chloroform-*d*)**  $\delta$  20.90.

**Dimethyl (diazo(naphthalen-1-yl)methyl)phosphonate (1C)**

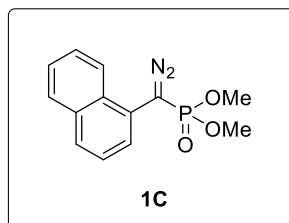

Following the procedure A on 5 mmol scale, orange oil, yield: 55% (759.5 mg), column chromatography (silica gel, PE: EtOAc = 3:1, v/v). Spectroscopic data are in agreement with those previously reported.<sup>4</sup>

**<sup>1</sup>H NMR (500 MHz, Chloroform-*d*)**  $\delta$  8.04 – 8.00 (m, 1H), 7.93 – 7.90 (m, 1H), 7.88 – 7.84 (m, 1H),

7.65 – 7.60 (m, 2H), 7.57 – 7.53 (m, 1H), 7.50 (dd,  $J = 8.2, 7.2$  Hz, 1H), 3.80 (d,  $J = 11.7$  Hz, 6H).

**Diethyl (diazo(phenyl)methyl)phosphonate (4a)**

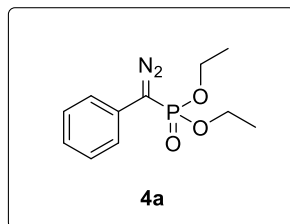

Following the procedure B on 10 mmol scale, orange oil, yield: 67% (1.71 g), column chromatography (silica gel, PE: EtOAc = 3:1, v/v). Spectroscopic data are in agreement with those previously reported.<sup>4</sup>

<sup>1</sup>H NMR (500 MHz, Chloroform-*d*)  $\delta$  7.36 – 7.32 (m, 2H), 7.19 – 7.15 (m, 2H), 7.15 – 7.11 (m, 1H), 4.26 – 4.08 (m, 4H), 1.33 (td,  $J = 7.1, 0.8$  Hz, 6H).

**Diisopropyl (diazo(phenyl)methyl)phosphonate (4b)**

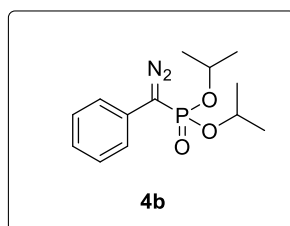

Following the procedure B on 10 mmol scale, orange oil, yield: 40% (1.12 g), column chromatography (silica gel, PE: EtOAc = 3:1, v/v). Spectroscopic data are in agreement with those previously reported.<sup>4</sup>

<sup>1</sup>H NMR (500 MHz, Chloroform-*d*)  $\delta$  7.36 – 7.31 (m, 2H), 7.19 – 7.16 (m, 2H), 7.13 – 7.08 (m, 1H), 4.75 (dp,  $J = 8.2, 6.2$  Hz, 2H), 1.39 (d,  $J = 6.2$  Hz, 6H), 1.24 (d,  $J = 6.2$  Hz, 6H).

**Dihexyl (diazo(phenyl)methyl)phosphonate (4c)**

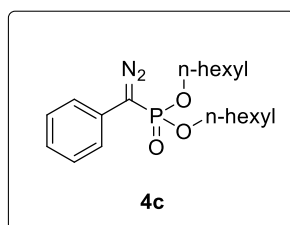

Following the procedure B on 10 mmol scale, orange oil, yield: 58% (1.13 g), column chromatography (silica gel, PE: EtOAc = 3:1, v/v).

<sup>1</sup>H NMR (500 MHz, Chloroform-*d*)  $\delta$  7.36 – 7.31 (m, 2H), 7.19 – 7.15 (m, 2H), 7.12 (t,  $J = 7.4$  Hz,

1H), 4.18 – 3.99 (m, 4H), 1.69 – 1.62 (m, 4H), 1.38 – 1.30 (m, 4H), 1.28 – 1.20 (m, 8H), 0.85 (t,  $J = 6.9$  Hz, 6H).

$^{13}\text{C}$  NMR (126 MHz, Chloroform-*d*)  $\delta$  129.1, 126.7 (d,  $J = 9.6$  Hz), 125.0, 122.6 (d,  $J = 4.5$  Hz), 66.8 (d,  $J = 5.2$  Hz), 31.2, 30.1 (d,  $J = 7.0$  Hz), 25.1, 22.4, 13.9.

$^{31}\text{P}$  NMR (202 MHz, Chloroform-*d*)  $\delta$  18.11.

### 1.3 General procedure C for preparation of phosphine-borane adducts

A solution of phosphine (1.0 equiv) in anhydrous THF (20 mL) was added a borane-tetrahydrofuran complex solution (1.0 mol/L in THF) (20 mL, 20 mmol, 2.0 equiv) dropwise at 0 °C. The resulting mixture was stirred overnight. The solution was then slowly added sat.  $\text{NaHCO}_3$  (10 mL) and extracted with ethyl acetate (3 x 20 mL). The combined organic layer was dried over anhydrous  $\text{Na}_2\text{SO}_4$  and the solvent was evaporated. The crude residue was purified by column chromatography (silica gel, PE: EtOAc =10:1) to afford the final products.

#### Methyldiphenylphosphane borane (2a)

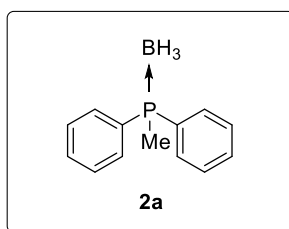

Following the procedure C on 10 mmol scale, white solid, yield: 95% (2.03 g), column chromatography (silica gel, PE: EtOAc =10:1, v/v). Spectroscopic data are in agreement with those previously reported.<sup>5</sup>

$^1\text{H}$  NMR (500 MHz, Chloroform-*d*)  $\delta$  7.70 – 7.63 (m, 4H), 7.51 – 7.46 (m, 2H), 7.46 – 7.41 (m, 4H), 1.87 (d,  $J = 10.2$  Hz, 3H), 1.41 – 0.58 (m, 3H).

#### Ethyldiphenylphosphane borane (2b)

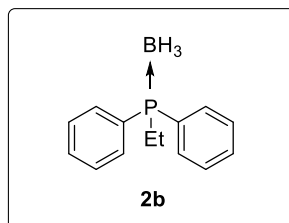

Following the procedure C on 10 mmol scale, white solid, yield: 92% (2.09 g), column chromatography (silica gel, PE: EtOAc =10:1, v/v). Spectroscopic data are in agreement with those



previously reported.<sup>6</sup>

**<sup>1</sup>H NMR (500 MHz, Chloroform-*d*)**  $\delta$  7.7 – 7.6 (m, 4H), 7.5 – 7.4 (m, 6H), 1.9 (d,  $J = 10.2$  Hz, 3H), 1.4 – 0.6 (m, 3H).

**Isopropyldiphenylphosphane borane (2c)**

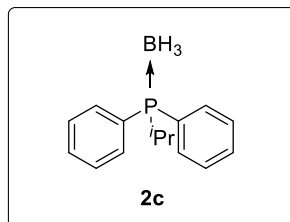

Following the procedure C on 10 mmol scale, white solid, yield: 93% (2.25 g), column chromatography (silica gel, PE: EtOAc =10:1, v/v). Spectroscopic data are in agreement with those previously reported.<sup>7</sup>

**<sup>1</sup>H NMR (400 MHz, Chloroform-*d*)**  $\delta$  7.82 – 7.70 (m, 4H), 7.51 – 7.39 (m, 6H), 2.72 (dhept,  $J = 14.0$ , 7.0 Hz, 1H), 1.16 (m, 9H).

**Dimethyl(phenyl)phosphane borane (2d)**

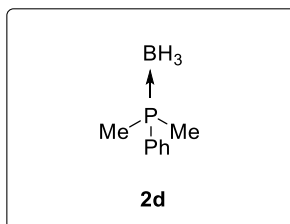

Following the procedure C on 10 mmol scale, white solid, yield: 91% (1.37 g), column chromatography (silica gel, PE: EtOAc =10:1, v/v). Spectroscopic data are in agreement with those previously reported.<sup>5</sup>

**<sup>1</sup>H NMR (500 MHz, Chloroform-*d*)**  $\delta$  7.76 – 7.69 (m, 2H), 7.52 – 7.43 (m, 3H), 1.56 (d,  $J = 10.4$  Hz, 6H), 1.12 – 0.41 (m, 3H).

**Diethyl(phenyl)phosphane borane (2e)**

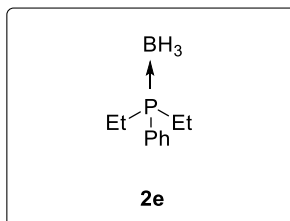

Following the procedure C on 10 mmol scale, white solid, yield: 94% (1.69 g), column

chromatography (silica gel, PE: EtOAc =10:1, v/v). Spectroscopic data are in agreement with those previously reported.<sup>5</sup>

**<sup>1</sup>H NMR (500 MHz, Chloroform-*d*)**  $\delta$  7.76 – 7.65 (m, 2H), 7.53 – 7.42 (m, 3H), 1.94 – 1.80 (m, 4H), 1.05 (dt,  $J$  = 16.5, 7.6 Hz, 6H), 1.00 – 0.31 (m, 3H).

**Dicyclohexyl(phenyl)phosphane borane (2f)**

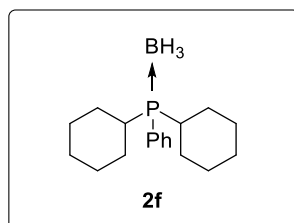

Following the procedure C on 10 mmol scale, white solid, yield: 91% (2.61 g), column chromatography (silica gel, PE: EtOAc =10:1, v/v). Spectroscopic data are in agreement with those previously reported.<sup>8</sup>

**<sup>1</sup>H NMR (400 MHz, Chloroform-*d*)**  $\delta$  7.68 (t,  $J$  = 8.3 Hz, 2H), 7.52 – 7.39 (m, 3H), 2.15 – 2.00 (m, 2H), 1.94 (d,  $J$  = 10.5 Hz, 2H), 1.85 – 1.55 (m, 8H), 1.37 – 1.05 (m, 10H), 0.61 (q,  $J$  = 81.0 Hz, 3H).

**Trimethylphosphane borane (2g)**

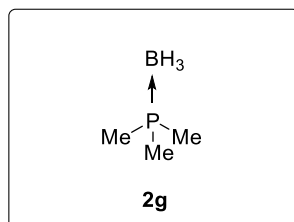

Following the procedure C on 10 mmol scale, white solid, yield: 80% (0.71 g), column chromatography (silica gel, PE: EtOAc =10:1, v/v). Spectroscopic data are in agreement with those previously reported.<sup>5</sup>

**<sup>1</sup>H NMR (500 MHz, Chloroform-*d*)**  $\delta$  1.32 (d,  $J$  = 10.6 Hz, 9H), 0.82 – 0.16 (m, 3H).

**Tributylphosphane borane (2h)**

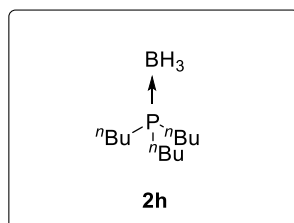

Following the procedure C on 10 mmol scale, colorless oil, yield: 94% (2.05 g), column

chromatography (silica gel, PE: EtOAc =10:1, v/v). Spectroscopic data are in agreement with those previously reported.<sup>5</sup>

**<sup>1</sup>H NMR (500 MHz, Chloroform-*d*)**  $\delta$  1.60 – 1.51 (m, 6H), 1.50 – 1.32 (m, 12H), 0.92 (t,  $J = 7.1$  Hz, 9H), 0.74 – 0.06 (m, 3H).

#### Trimethylphosphite borane (**2i**)

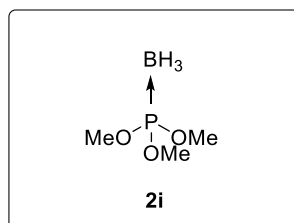

A solution of phosphine (1.0 equiv) in anhydrous THF (20 mL) was added a borane-tetrahydrofuran complex solution (1.0 mol/L in THF) (20 mL, 20 mmol, 2.0 equiv) dropwise at 0 °C. The resulting mixture was stirred overnight at rt. The solution was then slowly added sat. NaHCO<sub>3</sub> (10 mL) and extracted with ethyl acetate (3 x 20 mL). The combined organic layer was dried over anhydrous Na<sub>2</sub>SO<sub>4</sub> and the solvent was evaporated. The crude residue was purified by column chromatography (silica gel, PE: EtOAc =10:1) to afford the final products. colorless oil, yield: 85% (1.18 g). Spectroscopic data are in agreement with those previously reported.<sup>9</sup>

**<sup>1</sup>H NMR (500 MHz, Chloroform-*d*)**  $\delta$  3.70 (dd,  $J = 11.0, 1.6$  Hz, 9H), 0.76 – 0.04 (m, 3H).

#### 1.4 General procedure D for the synthesis of chiral $\alpha$ -boryl phosphonates

In air, a 25 mL schlenk tube was charged with Cu(MeCN)<sub>4</sub>PF<sub>6</sub> (5 mol%), **L1** (6 mol%). The tube was evacuated and filled with argon for three cycles. Then, 2 mL of CPME, **1** or **4** (0.20 mmol, 1.0 equiv) and **2** (0.40 mmol, 2.0 equiv) was added under argon. The reaction was allowed to stir at 20 °C for 12 hours. Upon completion, proper amount of silica gel was added to the reaction mixture. After removal of the solvent, the crude reaction mixture was purified on silica gel (petroleum ether and ethyl acetate) to afford the desired products.

#### (*S*)-dimethyl(((methylphenylphosphane)boryl)(phenyl)methyl)phosphonate(**3aa**)

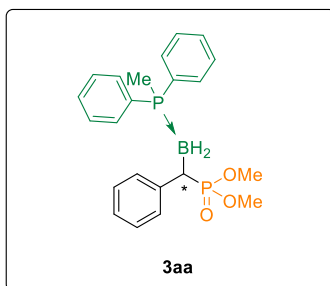

Following the general procedure D, dimethyl (diazo(phenyl)methyl)phosphonate (0.20 mmol, 1.0 equiv) and methyldiphenylphosphane borane (0.40 mmol, 2.0 equiv) were employed and stirred at 20 °C for 12 h to afford **3aa** as a white solid in 86% yield (71.1 mg) with 92% ee.

**mp:** 128.0 – 129.3 °C

**R<sub>f</sub>** = 0.50 (silica gel, EtOAc:PE = 3:1).

**<sup>1</sup>H NMR (500 MHz, Chloroform-*d*)** δ 7.52 – 7.38 (m, 8H), 7.35 – 7.30 (m, 2H), 7.14 – 7.07 (m, 4H), 7.05 – 7.00 (m, 1H), 3.60 (dd, *J* = 14.9, 10.5 Hz, 6H), 2.50 – 2.39 (m, 1H), 1.30 (d, *J* = 10.2 Hz, 3H).

**<sup>13</sup>C NMR (126 MHz, Chloroform-*d*)** δ 141.5 (dd, *J* = 8.7, 5.4 Hz), 131.8 (dd, *J* = 25.7, 8.9 Hz), 131.1 (dd, *J* = 27.9, 2.5 Hz), 129.7 (d, *J* = 58.1 Hz), 129.4 (d, *J* = 7.7 Hz), 128.8 (dd, *J* = 30.4, 9.9 Hz), 128.0 (d, *J* = 2.8 Hz), 127.8 (d, *J* = 55.4 Hz), 125.0 (d, *J* = 3.5 Hz), 52.7 (dd, *J* = 66.7, 6.9 Hz), 9.2 (d, *J* = 36.8 Hz).

**<sup>11</sup>B NMR (160 MHz, Chloroform-*d*)** δ -26.40.

**<sup>31</sup>P NMR (202 MHz, Chloroform-*d*)** δ 39.31 (d, *J* = 83.6 Hz), 6.28.

**HRMS (ESI):** calcd for (M+H)<sup>+</sup> C<sub>22</sub>H<sub>28</sub>BO<sub>3</sub>P<sub>2</sub><sup>+</sup> 413.1601; found 413.1611.

**HPLC analysis:** DAICEL CHIRALCEL ID-3, hexane/isopropanol = 60/40, 1 mL/min, λ = 254 nm, t<sub>R</sub> (major) = 15.135 min, t<sub>R</sub> (minor) = 11.938 min, 92% ee.

**[α]<sub>D</sub><sup>25</sup>:** +73.2 (*c* 0.5, CHCl<sub>3</sub>).

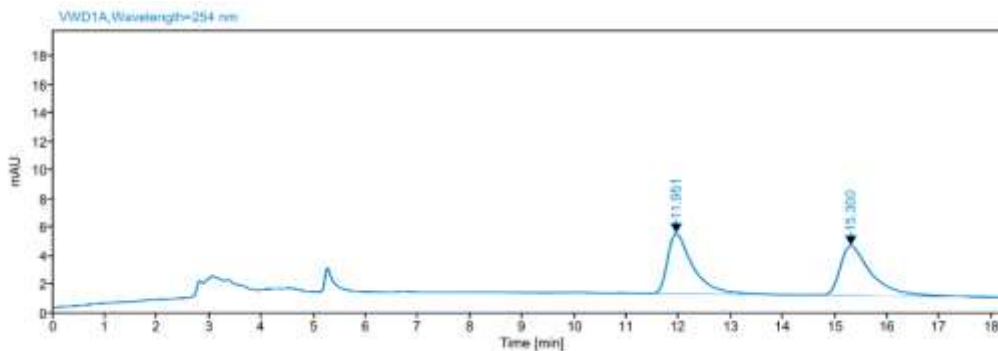

Signal: VWD1A, Wavelength=254 nm

| RT [min] | Type       | Width [min] | Area          | Height | Area% | Name |
|----------|------------|-------------|---------------|--------|-------|------|
| 11.951   | BB         | 2.77        | 143.10        | 4.21   | 50.10 |      |
| 15.300   | BB         | 3.23        | 142.55        | 3.45   | 49.90 |      |
|          | <b>Sum</b> |             | <b>285.65</b> |        |       |      |

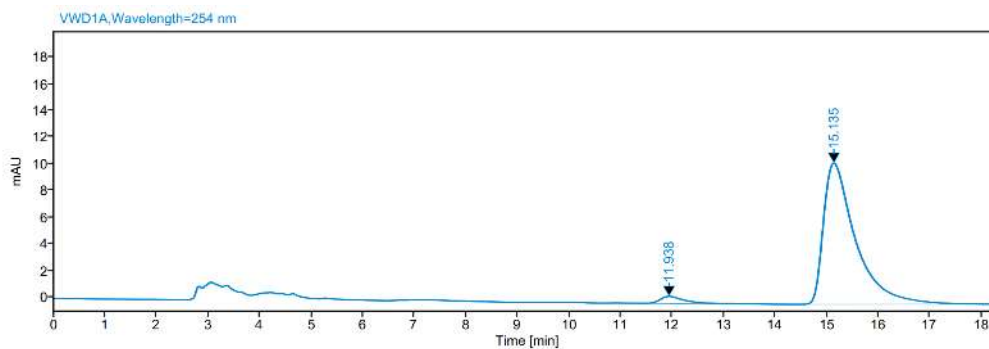

Signal: VWD1A, Wavelength=254 nm

| RT [min] | Type       | Width [min] | Area          | Height | Area% | Name |
|----------|------------|-------------|---------------|--------|-------|------|
| 11.938   | MM m       | 2.42        | 18.26         | 0.53   | 3.83  |      |
| 15.135   | BB         | 3.55        | 457.99        | 10.56  | 96.17 |      |
|          | <b>Sum</b> |             | <b>476.25</b> |        |       |      |

**(S)-dimethyl(((methylphenylphosphane)boryl)(4-chlorophenyl)methyl)phosphonate(3ba)**

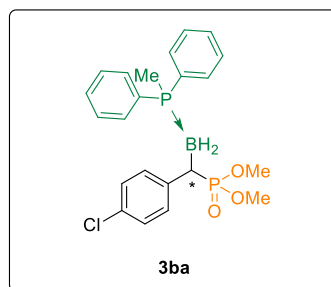

Following the general procedure D, dimethyl ((4-chlorophenyl)(diazo)methyl)phosphonate (0.20 mmol, 1.0 equiv) and methylphenylphosphane borane (0.40 mmol, 2.0 equiv) were employed and stirred at 20 °C for 12 h to afford **3ba** as a colorless oil in 87% yield (77.9 mg) with 95% ee.

$R_f$  = 0.60 (silica gel, EtOAc:PE = 3:1).

$^1\text{H NMR}$  (500 MHz, Chloroform-*d*)  $\delta$  7.51 – 7.39 (m, 8H), 7.36 – 7.30 (m, 2H), 7.06 – 6.99 (m, 4H),

3.60 (dd,  $J = 14.2, 10.5$  Hz, 6H), 2.50 – 2.36 (m, 1H), 1.44 (d,  $J = 10.2$  Hz, 3H).

$^{13}\text{C}$  NMR (126 MHz, Chloroform-*d*)  $\delta$  140.2 (dd,  $J = 8.0, 5.8$  Hz), 131.7 (dd,  $J = 24.0, 8.9$  Hz), 131.2 (dd,  $J = 28.4, 2.5$  Hz), 130.6 (d,  $J = 7.7$  Hz), 130.5 (d,  $J = 4.3$  Hz), 129.1 (d,  $J = 57.9$  Hz), 128.8 (dd,  $J = 25.0, 10.0$  Hz), 127.9 (d,  $J = 2.9$  Hz), 127.8 (d,  $J = 55.8$  Hz), 52.7 (dd,  $J = 61.2, 7.1$  Hz), 9.5 (d,  $J = 37.3$  Hz).

$^{11}\text{B}$  NMR (160 MHz, Chloroform-*d*)  $\delta$  -26.85.

$^{31}\text{P}$  NMR (202 MHz, Chloroform-*d*)  $\delta$  38.54 (d,  $J = 81.0$  Hz), 6.05.

HRMS (ESI): calcd for  $(\text{M}+\text{H})^+ \text{C}_{22}\text{H}_{26}\text{BClO}_3\text{P}_2^+$  447.1212, found 447.1212.

HPLC analysis: DAICEL CHIRALCEL ID-3, hexane/isopropanol = 80/20, 1 mL/min,  $\lambda = 254$  nm,

$t_{\text{R}}$  (major) = 25.642 min,  $t_{\text{R}}$  (minor) = 28.328 min, 95% ee.

$[\alpha]_{\text{D}}^{25}$ : +95.8 (c 0.5,  $\text{CHCl}_3$ ).

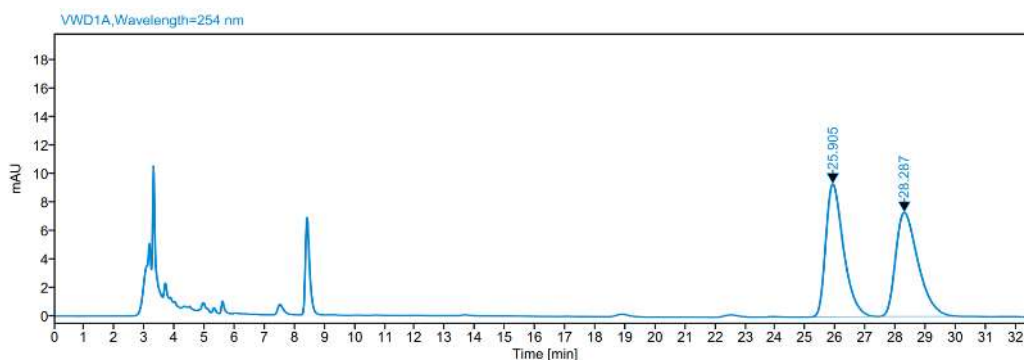

Signal: VWD1A, Wavelength=254 nm

| RT [min] | Type | Width [min] | Area   | Height | Area% | Name |
|----------|------|-------------|--------|--------|-------|------|
| 25.905   | BB   | 2.38        | 384.13 | 9.35   | 50.25 |      |
| 28.287   | BB   | 2.87        | 380.29 | 7.32   | 49.75 |      |
| Sum      |      |             | 764.43 |        |       |      |

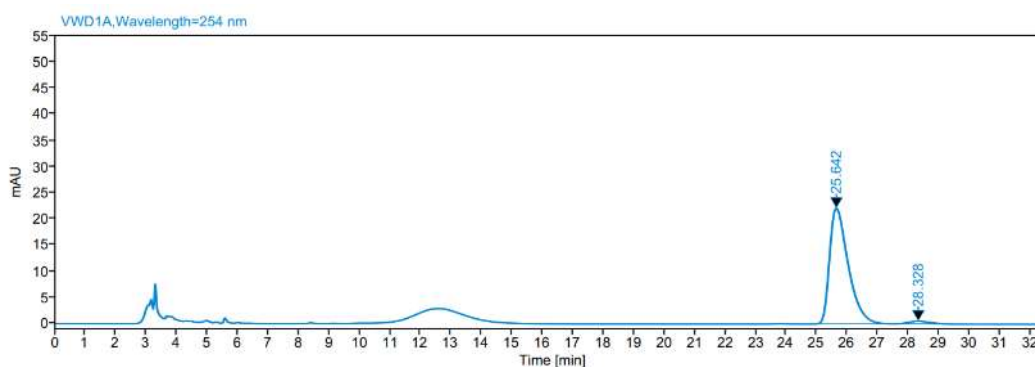

Signal: VWD1A, Wavelength=254 nm

| RT [min] | Type | Width [min] | Area   | Height | Area% | Name |
|----------|------|-------------|--------|--------|-------|------|
| 25.642   | BB   | 2.69        | 939.28 | 22.11  | 97.44 |      |
| 28.328   | MM m | 1.97        | 24.68  | 0.51   | 2.56  |      |
| Sum      |      |             | 963.96 |        |       |      |

**(S)-dimethyl(((methyl)phenylphosphane)boryl)(4-(hydroxymethyl)phenyl)methyl phosphonate(3ca)**

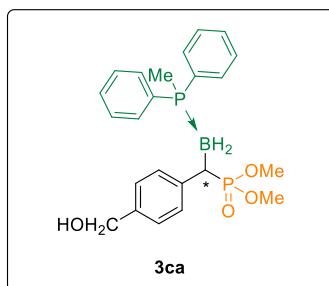

Following the general procedure D, dimethyl (diazo(4-(hydroxymethyl)phenyl)methyl) phosphonate (0.20 mmol, 1.0 equiv) and methylphenylphosphane borane (0.40 mmol, 2.0 equiv) were employed and stirred at 20 °C for 12 h to afford **3ca** as a colorless oil in 87% yield (77.0 mg) with 91% ee.

$R_f = 0.18$  (silica gel, EtOAc:PE = 3:1).

$^1\text{H NMR}$  (400 MHz, Chloroform-*d*)  $\delta$  7.52 – 7.38 (m, 8H), 7.36 – 7.29 (m, 2H), 7.09 (s, 4H), 4.57 (d,  $J = 1.7$  Hz, 2H), 3.59 (dd,  $J = 17.0, 10.6$  Hz, 6H), 2.52 – 2.37 (m, 1H), 1.34 (d,  $J = 10.2$  Hz, 3H).

$^{13}\text{C NMR}$  (126 MHz, Chloroform-*d*)  $\delta$  140.7, 137.9 (d,  $J = 3.1$  Hz), 131.8 (dd,  $J = 24.6, 8.9$  Hz), 131.1 (dd,  $J = 30.7, 2.0$  Hz), 129.8, 129.4 (d,  $J = 7.8$  Hz), 128.8 (dd,  $J = 29.7, 9.9$  Hz), 127.8 (d,  $J = 55.6$  Hz), 126.8 (d,  $J = 2.6$  Hz), 65.0, 52.7 (dd,  $J = 52.7, 6.8$  Hz), 9.3 (d,  $J = 37.0$  Hz).

$^{11}\text{B NMR}$  (128 MHz, Chloroform-*d*)  $\delta$  -26.06.

$^{31}\text{P NMR}$  (162 MHz, Chloroform-*d*)  $\delta$  38.76 (d,  $J = 83.0$  Hz), 5.55.

**HRMS (ESI):** calc'd for  $(\text{M}+\text{H})^+ \text{C}_{23}\text{H}_{30}\text{BO}_4\text{P}_2^+$  443.1707, found 443.1707.

**HPLC analysis:** DAICEL CHIRALCEL AD-H, hexane/isopropanol = 80/20, 1 mL/min,  $\lambda = 254$  nm,  $t_R$  (major) = 12.609 min,  $t_R$  (minor) = 14.270 min, 91% ee.

$[\alpha]^{25}_D: +62.9$  (*c* 0.5,  $\text{CHCl}_3$ ).

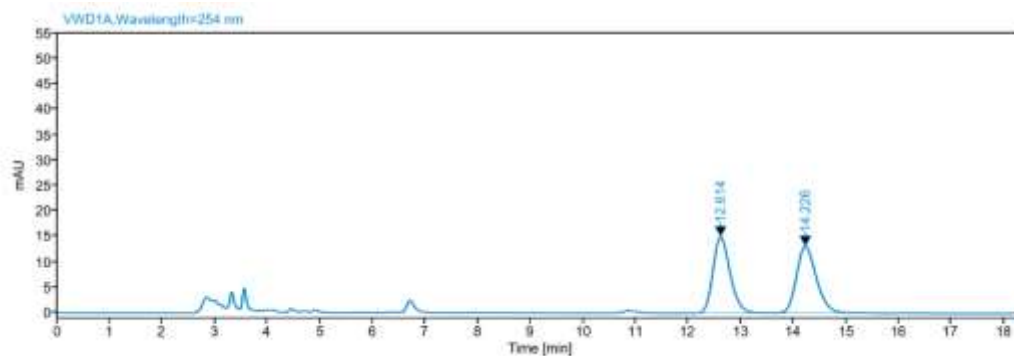

Signal: VWD1A,Wavelength=254 nm

| RT [min] | Type | Width [min] | Area   | Height | Area% | Name |
|----------|------|-------------|--------|--------|-------|------|
| 12.614   | BB   | 1.44        | 340.82 | 15.05  | 49.54 |      |
| 14.226   | BB   | 2.16        | 347.10 | 13.15  | 50.46 |      |
| Sum      |      |             | 687.92 |        |       |      |

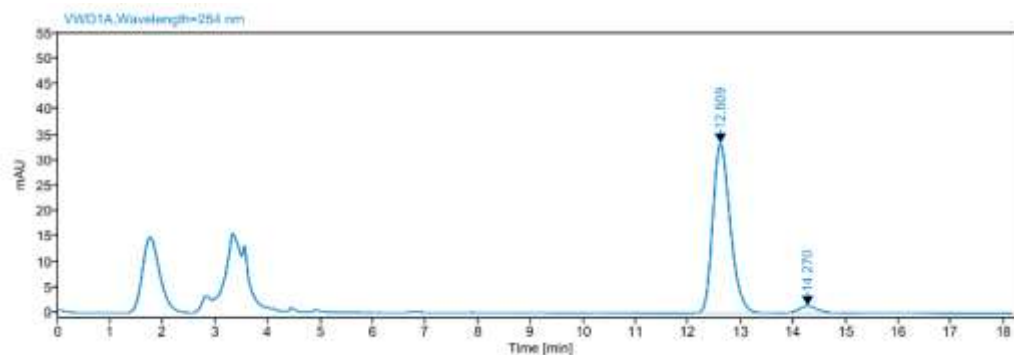

Signal: VWD1A,Wavelength=254 nm

| RT [min] | Type | Width [min] | Area   | Height | Area% | Name |
|----------|------|-------------|--------|--------|-------|------|
| 12.609   | BB   | 1.78        | 770.36 | 33.36  | 95.70 |      |
| 14.270   | MM m | 1.19        | 34.61  | 1.36   | 4.30  |      |
| Sum      |      |             | 804.97 |        |       |      |

**(S)-dimethyl(((methylphenylphosphane)boryl)(4-methoxyphenyl)methyl)phosphonate(3da)**

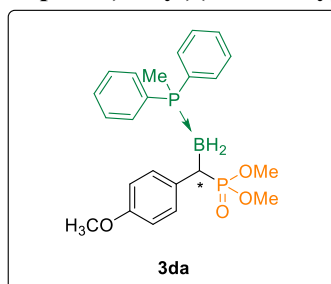

Following the general procedure D, dimethyl(diazo(4-methoxyphenyl)methyl)phosphonate (0.20 mmol, 1.0 equiv) and methylphenylphosphane borane (0.40 mmol, 2.0 equiv) were employed and stirred at 20 °C for 12 h to afford **3da** as a colorless oil in 96% yield (85.3 mg) with 90% ee.

$R_f = 0.50$  (silica gel, EtOAc:PE = 3:1).

<sup>1</sup>H NMR (400 MHz, Chloroform-*d*)  $\delta$  7.52 – 7.37 (m, 8H), 7.36 – 7.28 (m, 2H), 7.03 (dd,  $J = 8.6, 2.6$  Hz, 2H), 6.65 (d,  $J = 8.3$  Hz, 2H), 3.72 (s, 3H), 3.59 (dd,  $J = 15.1, 10.5$  Hz, 6H), 2.46 – 2.30 (m, 1H),



1.34 (d,  $J = 10.2$  Hz, 3H).

$^{13}\text{C}$  NMR (101 MHz, Chloroform- $d$ )  $\delta$  157.2 (d,  $J = 3.5$  Hz), 133.1 (dd,  $J = 8.9, 4.8$  Hz), 131.8 (dd,  $J = 18.3, 8.8$  Hz), 131.1 (dd,  $J = 22.4, 2.5$  Hz), 130.2 (d,  $J = 7.6$  Hz), 129.7 (d,  $J = 57.7$  Hz), 128.7 (dd,  $J = 23.6, 9.9$  Hz), 127.9 (d,  $J = 55.6$  Hz), 113.4 (d,  $J = 2.8$  Hz), 55.1, 52.6 (dd,  $J = 48.4, 7.0$  Hz), 9.4 (d,  $J = 36.9$  Hz).

$^{11}\text{B}$  NMR (128 MHz, Chloroform- $d$ )  $\delta$  -26.16.

$^{31}\text{P}$  NMR (162 MHz, Chloroform- $d$ )  $\delta$  39.09 (d,  $J = 84.4$  Hz), 5.76.

HRMS (ESI): calc'd for  $(\text{M}+\text{H})^+ \text{C}_{23}\text{H}_{30}\text{BO}_4\text{P}_2^+$  443.1707, found 443.1707.

HPLC analysis: DAICEL CHIRALCEL IA-3, hexane/isopropanol = 80/20, 1 mL/min,  $\lambda = 254$  nm,

$t_{\text{R}}$  (major) = 14.597 min,  $t_{\text{R}}$  (minor) = 12.354 min, 90% ee.

$[\alpha]_{\text{D}}^{25}$ : +51.4 ( $c$  0.5,  $\text{CHCl}_3$ ).

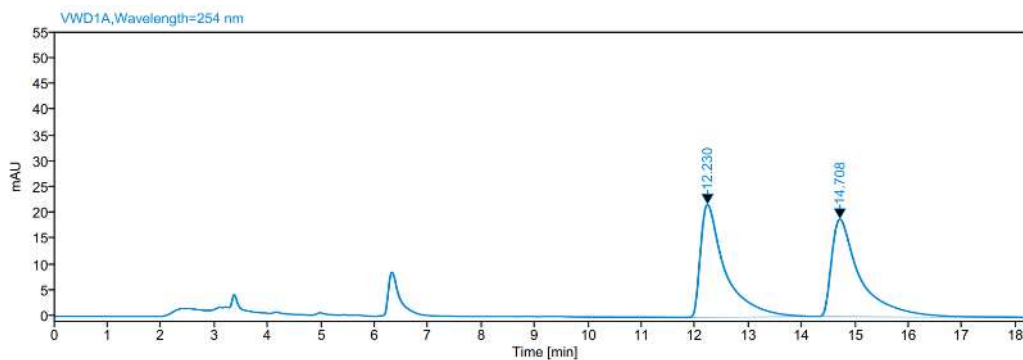

Signal: VWD1A, Wavelength=254 nm

| RT [min] | Type | Width [min] | Area           | Height | Area% | Name |
|----------|------|-------------|----------------|--------|-------|------|
| 12.230   | BB   | 2.49        | 700.66         | 21.86  | 49.79 |      |
| 14.708   | BB   | 4.37        | 706.44         | 18.92  | 50.21 |      |
|          |      | <b>Sum</b>  | <b>1407.10</b> |        |       |      |

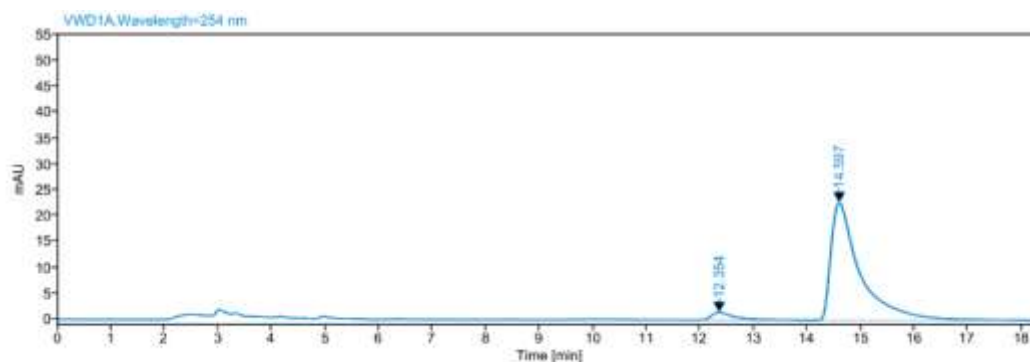

Signal: VWD1A, Wavelength=254 nm

| RT [min] | Type | Width [min] | Area          | Height | Area% | Name |
|----------|------|-------------|---------------|--------|-------|------|
| 12.354   | MM m | 1.78        | 44.68         | 1.45   | 4.95  |      |
| 14.597   | BB   | 4.55        | 857.27        | 22.71  | 95.05 |      |
|          |      | <b>Sum</b>  | <b>901.95</b> |        |       |      |

**(S)-dimethyl(((methylphenylphosphane)boryl)(p-tolyl)methyl)phosphonate(3ea)**

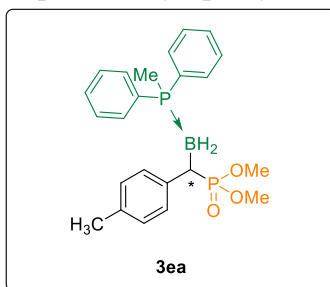

Following the general procedure D, dimethyl (diazo(p-tolyl)methyl)phosphonate (0.20 mmol, 1.0 equiv) and methylphenylphosphane borane (0.40 mmol, 2.0 equiv) were employed and stirred at 20 °C for 12 h to afford **3ea** as a colorless oil in 74% yield (63.3 mg) with 94% ee.

$R_f$  = 0.63 (silica gel, EtOAc:PE = 3:1).

$^1\text{H NMR}$  (500 MHz, Chloroform-*d*)  $\delta$  7.51 – 7.39 (m, 8H), 7.35 – 7.30 (m, 2H), 7.00 (dd,  $J$  = 8.1, 2.4 Hz, 2H), 6.90 (d,  $J$  = 7.7 Hz, 2H), 3.60 (dd,  $J$  = 10.5, 8.7 Hz, 6H), 2.48 – 2.35 (m, 1H), 2.24 (s, 3H), 1.33 (d,  $J$  = 10.3 Hz, 3H).

$^{13}\text{C NMR}$  (126 MHz, Chloroform-*d*)  $\delta$  138.1 (dd,  $J$  = 8.3, 5.7 Hz), 134.3 (d,  $J$  = 3.6 Hz), 131.8 (dd,  $J$  = 26.4, 8.8 Hz), 131.0 (d,  $J$  = 32.2 Hz), 129.8 (d,  $J$  = 58.0 Hz), 129.2 (d,  $J$  = 7.6 Hz), 129.1 – 128.4 (m, 3C), 128.0 (d,  $J$  = 55.2 Hz), 52.6 (dd,  $J$  = 64.8, 6.8 Hz), 20.9, 9.3 (d,  $J$  = 36.7 Hz).

$^{11}\text{B NMR}$  (128 MHz, Chloroform-*d*)  $\delta$  -26.02.

$^{31}\text{P NMR}$  (202 MHz, Chloroform-*d*)  $\delta$  39.64 (d,  $J$  = 84.2 Hz), 6.39.

**HRMS (ESI):** calcd for  $(\text{M}+\text{H})^+$   $\text{C}_{23}\text{H}_{30}\text{BO}_3\text{P}_2^+$  427.1758, found 427.1758.

**HPLC analysis:** DAICEL CHIRALCEL IA-3, hexane/isopropanol = 92/08, 1 mL/min,  $\lambda$  = 254 nm,

$t_R$  (major) = 36.832 min,  $t_R$  (minor) = 32.049 min, 94% ee.

$[\alpha]_D^{25}$ : +76.8 ( $c$  0.5,  $\text{CHCl}_3$ ).

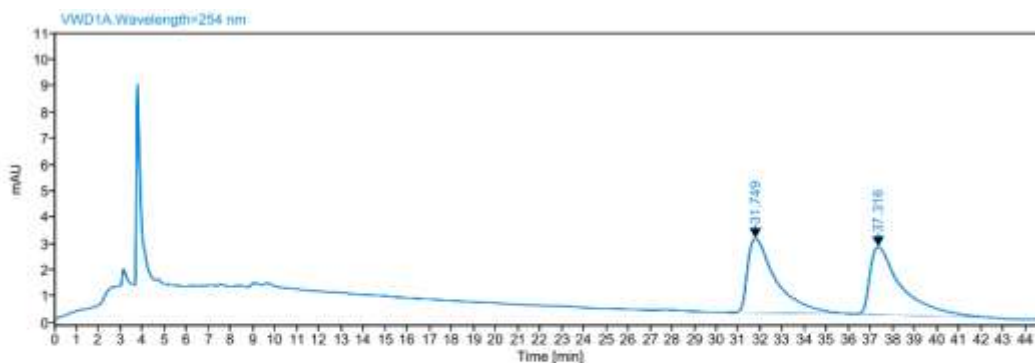

Signal: VWD1A, Wavelength=254 nm

| RT [min] | Type | Width [min] | Area   | Height | Area% | Name |
|----------|------|-------------|--------|--------|-------|------|
| 31.749   | BB   | 5.27        | 252.09 | 2.82   | 49.94 |      |
| 37.316   | BB   | 5.94        | 252.69 | 2.57   | 50.06 |      |
| Sum      |      |             | 504.78 |        |       |      |

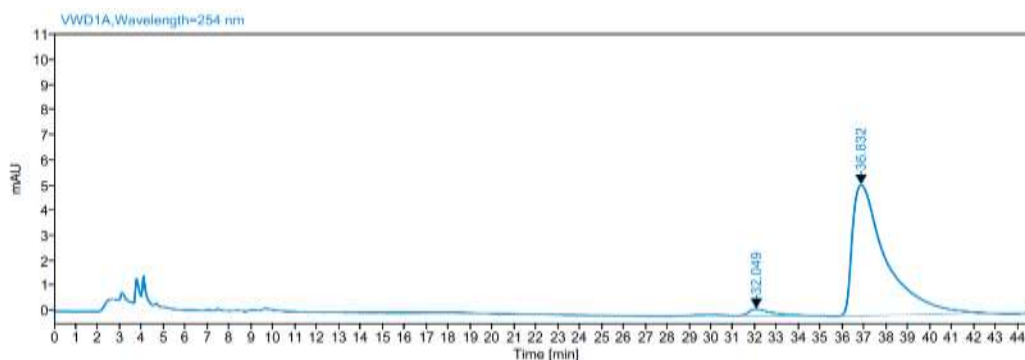

Signal: VWD1A, Wavelength=254 nm

| RT [min] | Type | Width [min] | Area   | Height | Area% | Name |
|----------|------|-------------|--------|--------|-------|------|
| 32.049   | MM m | 3.46        | 18.50  | 0.26   | 3.21  |      |
| 36.832   | BB   | 7.06        | 556.96 | 5.22   | 96.79 |      |
| Sum      |      |             | 575.45 |        |       |      |

**(S)-dimethyl(((methylphenylphosphane)boryl)(4-(methylthio)methyl)phosphonate(3fa)**

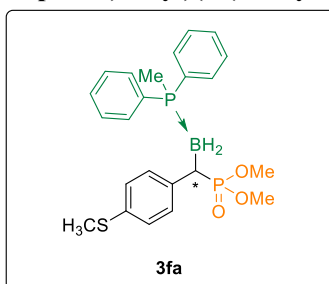

Following the general procedure D, dimethyl (diazo(4-(methylthio)phenyl)methyl) phosphonate (0.20 mmol, 1.0 equiv) and methylphenylphosphane borane (0.40 mmol, 2.0 equiv) were employed and stirred at 20 °C for 36 h to afford **3fa** as a yellow oil in 44% yield (40.6 mg) with 92% ee.

$R_f$  = 0.58 (silica gel, EtOAc:PE = 3:1).

**<sup>1</sup>H NMR (400 MHz, Chloroform-*d*)** δ 7.52 – 7.38 (m, 8H), 7.37 – 7.29 (m, 2H), 7.07 – 6.97 (m, 4H), 3.60 (t, *J* = 10.8 Hz, 6H), 2.41 (s, 4H), 1.40 (d, *J* = 10.2 Hz, 3H).

**<sup>13</sup>C NMR (101 MHz, Chloroform-*d*)** δ 138.7 (dd, *J* = 8.6, 5.6 Hz), 134.1 (d, *J* = 4.0 Hz), 131.8 (dd, *J* = 20.9, 8.9 Hz), 131.1 (dd, *J* = 23.1, 2.5 Hz), 129.9 (d, *J* = 7.8 Hz), 129.5 (d, *J* = 58.4 Hz), 128.8 (dd, *J* = 21.0, 10.0 Hz), 127.9 (d, *J* = 55.6 Hz), 126.9 (d, *J* = 2.8 Hz), 52.7 (dd, *J* = 49.3, 7.0 Hz), 16.3, 9.5 (d, *J* = 37.2 Hz).

**<sup>11</sup>B NMR (128 MHz, Chloroform-*d*)** δ -26.09.

**<sup>31</sup>P NMR (162 MHz, Chloroform-*d*)** δ 38.44 (d, *J* = 82.2 Hz), 5.53.

**HRMS (ESI):** calcd for (M+H)<sup>+</sup> C<sub>23</sub>H<sub>30</sub>BO<sub>3</sub>P<sub>2</sub>S<sup>+</sup> 459.1478, found 459.1477.

**HPLC analysis:** DAICEL CHIRALCEL ID-3, hexane/isopropanol = 80/20, 1 mL/min, λ = 254 nm, t<sub>R</sub> (major) = 52.985 min, t<sub>R</sub> (minor) = 49.269 min, 92% ee.

**[α]<sup>25</sup><sub>D</sub>:** +79.0 (*c* 0.5, CHCl<sub>3</sub>).

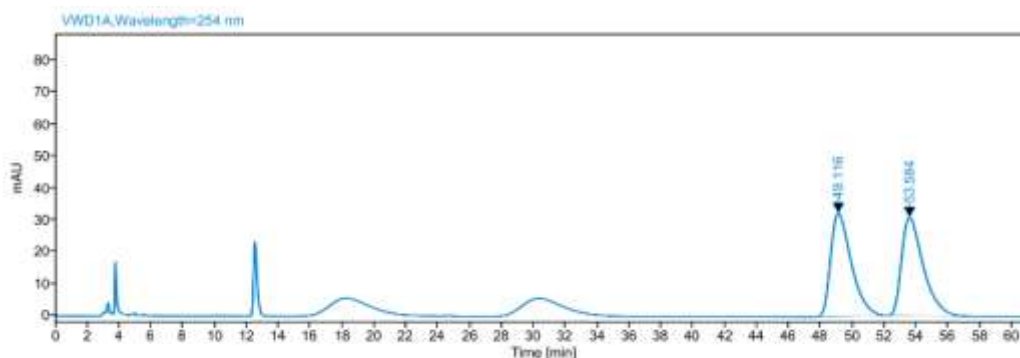

| Signal: VWD1A,Wavelength=254 nm |      |             |                |        |       |      |
|---------------------------------|------|-------------|----------------|--------|-------|------|
| RT [min]                        | Type | Width [min] | Area           | Height | Area% | Name |
| 49.116                          | BB   | 4.59        | 2917.99        | 32.34  | 49.93 |      |
| 53.584                          | BB   | 5.81        | 2926.61        | 30.82  | 50.07 |      |
|                                 |      | <b>Sum</b>  | <b>5844.60</b> |        |       |      |

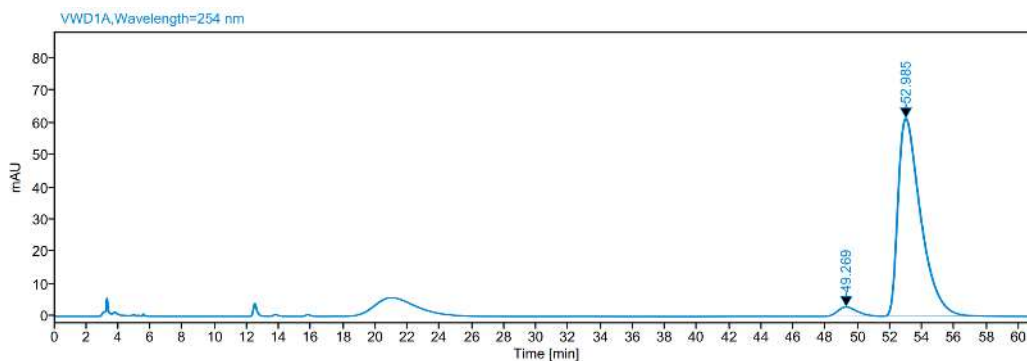

Signal: VWD1A,Wavelength=254 nm

| RT [min] | Type | Width [min] | Area    | Height | Area% | Name |
|----------|------|-------------|---------|--------|-------|------|
| 49.269   | BB   | 3.79        | 248.38  | 2.92   | 3.97  |      |
| 52.985   | BB   | 6.79        | 6015.18 | 61.43  | 96.03 |      |
| Sum      |      |             | 6263.57 |        |       |      |

**(S)-dimethyl(((methylphenylphosphane)boryl)(4-nitrophenyl)methyl)phosphonate(3ga)**

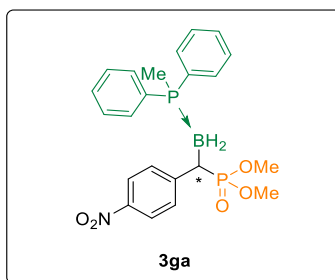

Following the general procedure D, dimethyl (diazo(4-nitrophenyl)methyl)phosphonate (0.20 mmol, 1.0 equiv) and methylphenylphosphane borane (0.40 mmol, 2.0 equiv) were employed and stirred at 20 °C for 36 h to afford **3ga** as a colorless oil in 70% yield (64.3 mg) with 96% ee.

$R_f$  = 0.49 (silica gel, EtOAc:PE = 3:1).

$^1\text{H NMR}$  (500 MHz, Chloroform-*d*)  $\delta$  7.89 – 7.84 (m, 2H), 7.50 – 7.36 (m, 8H), 7.35 – 7.30 (m, 2H), 7.25 – 7.20 (m, 2H), 3.63 (dd,  $J$  = 10.6, 6.2 Hz, 6H), 2.67 – 2.54 (m, 1H), 1.56 (d,  $J$  = 10.2 Hz, 3H).

$^{13}\text{C NMR}$  (126 MHz, Chloroform-*d*)  $\delta$  150.8 (dd,  $J$  = 8.0, 6.1 Hz), 145.3 (d,  $J$  = 3.6 Hz), 131.7 (dd,  $J$  = 15.5, 9.0 Hz), 131.4 (dd,  $J$  = 21.4, 2.5 Hz), 129.7 (d,  $J$  = 7.9 Hz), 128.9 (dd,  $J$  = 19.4, 10.1 Hz), 128.4 (d,  $J$  = 58.2 Hz), 127.7 (d,  $J$  = 57.0 Hz), 123.1 (d,  $J$  = 2.4 Hz), 52.9 (dd,  $J$  = 55.4, 7.0 Hz), 9.6 (d,  $J$  = 38.2 Hz).

$^{11}\text{B NMR}$  (160 MHz, Chloroform-*d*)  $\delta$  -26.62.

$^{31}\text{P NMR}$  (202 MHz, Chloroform-*d*)  $\delta$  36.86 (d,  $J$  = 73.4 Hz), 5.50.

**HRMS (ESI):** calcd for  $(\text{M}+\text{H})^+$   $\text{C}_{22}\text{H}_{27}\text{BNO}_5\text{P}_2^+$  458.1452, found 458.1452.

**HPLC analysis:** DAICEL CHIRALCEL IA-3, hexane/isopropanol = 80/20, 1 mL/min,  $\lambda$  = 254 nm,

$t_R$  (major) = 15.233 min,  $t_R$  (minor) = 12.811 min, 96% ee.

$[\alpha]_D^{25}$ : +90.4 ( $c$  0.5,  $\text{CHCl}_3$ ).

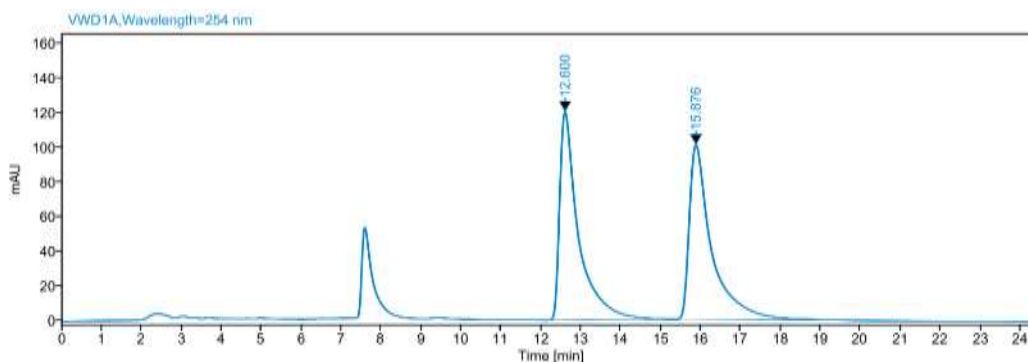

Signal: VWD1A, Wavelength=254 nm

| RT [min] | Type | Width [min] | Area    | Height | Area% | Name |
|----------|------|-------------|---------|--------|-------|------|
| 12.600   | BB   | 3.20        | 3916.24 | 119.70 | 49.97 |      |
| 15.876   | BB   | 5.93        | 3921.31 | 100.42 | 50.03 |      |
| Sum      |      |             | 7837.55 |        |       |      |

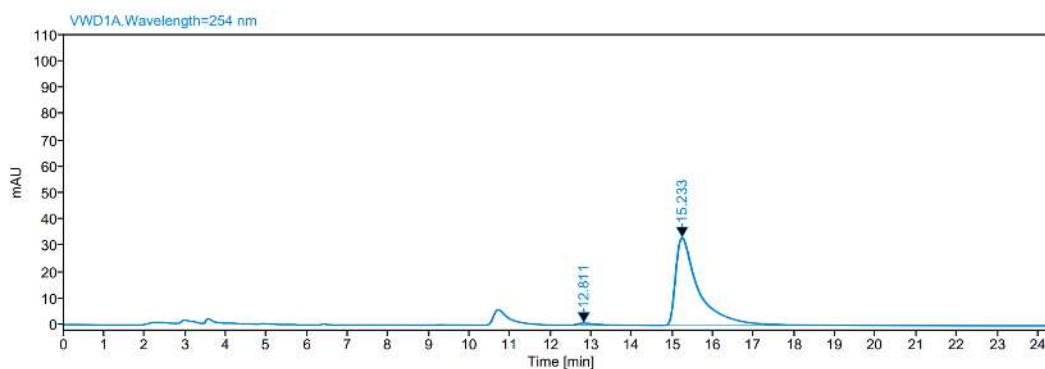

Signal: VWD1A, Wavelength=254 nm

| RT [min] | Type | Width [min] | Area    | Height | Area% | Name |
|----------|------|-------------|---------|--------|-------|------|
| 12.811   | MM m | 1.71        | 25.51   | 0.78   | 1.90  |      |
| 15.233   | BB   | 4.65        | 1315.11 | 33.28  | 98.10 |      |
| Sum      |      |             | 1340.62 |        |       |      |

**(S)-methyl-4-(((methylphenylphosphane)boryl) (dimethoxyphosphoryl)methyl)benzoate(3ha)**

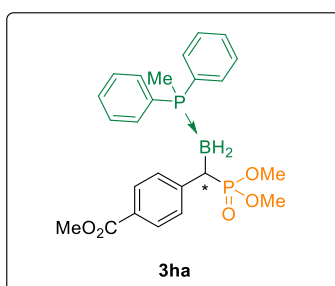

Following the general procedure D, methyl-4-(diazo(dimethoxyphosphoryl)methyl)benzoate (0.20 mmol, 1.0 equiv) and methylphenylphosphane borane (0.40 mmol, 2.0 equiv) were employed and stirred at 20 °C for 12 h to afford **3ha** as a colorless oil in 80% yield (75.6 mg) with 94% ee.

$R_f = 0.49$  (silica gel, EtOAc:PE = 3:1).

$^1\text{H NMR}$  (500 MHz, Chloroform-*d*)  $\delta$  7.74 (d,  $J = 8.5$  Hz, 2H), 7.50 – 7.37 (m, 8H), 7.33 – 7.28 (m, 2H), 7.16 (dd,  $J = 8.4, 2.3$  Hz, 2H), 3.85 (d,  $J = 1.2$  Hz, 3H), 3.62 – 3.55 (m, 6H), 2.59 – 2.46 (m, 1H), 1.35 (d,  $J = 10.2$  Hz, 3H).

$^{13}\text{C NMR}$  (126 MHz, Chloroform-*d*)  $\delta$  167.2, 147.8 (dd,  $J = 8.1, 5.5$  Hz), 131.7 (dd,  $J = 23.7, 8.9$  Hz), 131.2 (dd,  $J = 29.3, 2.6$  Hz), 129.2, 129.2, 128.8 (dd,  $J = 30.0, 9.9$  Hz), 127.5 (d,  $J = 56.0$  Hz), 126.7 (d,  $J = 3.4$  Hz), 52.7 (dd,  $J = 64.3, 7.0$  Hz), 51.8, 9.4 (d,  $J = 37.4$  Hz).

$^{11}\text{B NMR}$  (160 MHz, Chloroform-*d*)  $\delta$  -26.79.

$^{31}\text{P NMR}$  (202 MHz, Chloroform-*d*)  $\delta$  37.99 (d,  $J = 80.3$  Hz), 5.89.

**HRMS (ESI):** calc'd for  $(\text{M}+\text{H})^+ \text{C}_{24}\text{H}_{30}\text{BO}_5\text{P}_2^+$  471.1656, found 471.1656.

**HPLC analysis:** DAICEL CHIRALCEL AD-H, hexane/isopropanol = 80/20, 1 mL/min,  $\lambda = 254$  nm,

$t_R$  (major) = 20.630 min,  $t_R$  (minor) = 14.240 min, 94% ee.

$[\alpha]_D^{25}$ : +95.8 ( $c$  0.5,  $\text{CHCl}_3$ ).

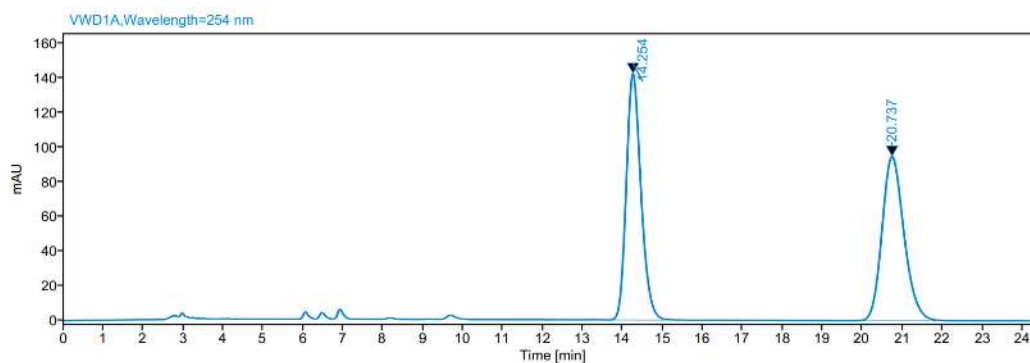

Signal: VWD1A,Wavelength=254 nm

| RT [min] | Type | Width [min] | Area           | Height | Area% | Name |
|----------|------|-------------|----------------|--------|-------|------|
| 14.254   | BB   | 2.20        | 3615.81        | 141.62 | 50.02 |      |
| 20.737   | BB   | 3.36        | 3613.47        | 94.40  | 49.98 |      |
|          |      | <b>Sum</b>  | <b>7229.28</b> |        |       |      |

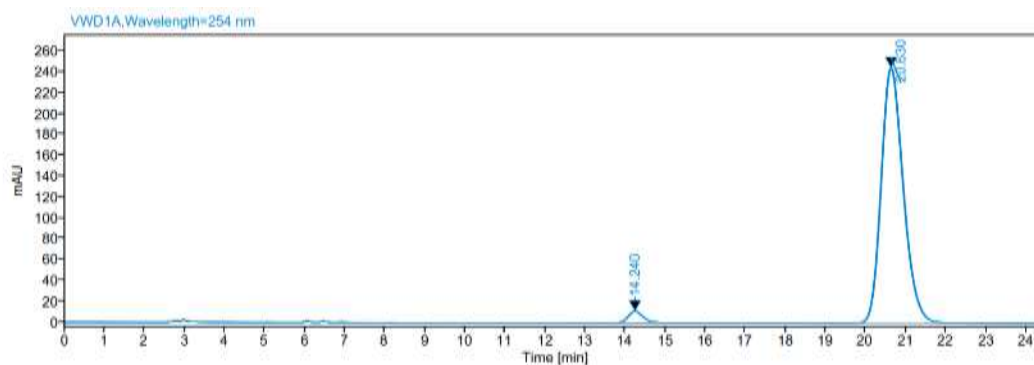

Signal: VWD1A,Wavelength=254 nm

| RT [min] | Type | Width [min] | Area    | Height | Area% | Name |
|----------|------|-------------|---------|--------|-------|------|
| 14.240   | BB   | 1.72        | 287.74  | 11.23  | 2.98  |      |
| 20.630   | BB   | 3.42        | 9359.54 | 244.57 | 97.02 |      |
| Sum      |      |             | 9647.28 |        |       |      |

**(S)-dimethyl(((methylphenylphosphane)boryl)(4-fluorophenyl)methyl)phosphonate(3ia)**

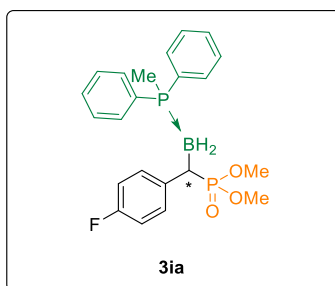

Following the general procedure D, dimethyl (diazo(4-fluorophenyl)methyl)phosphonate (0.20 mmol, 1.0 equiv) and methylphenylphosphane borane (0.40 mmol, 2.0 equiv) were employed and stirred at 20 °C for 12 h to afford **3ia** as a orange solid in 76% yield (65.5 mg) with 92% ee.

**mp:** 149.3 – 150.2 °C

**R<sub>f</sub>** = 0.51 (silica gel, EtOAc:PE = 3:1).

**<sup>1</sup>H NMR (400 MHz, Chloroform-*d*)** δ 7.52 – 7.37 (m, 8H), 7.37 – 7.30 (m, 2H), 7.11 – 7.03 (m, 2H), 6.76 (t, *J* = 8.6 Hz, 2H), 3.66 – 3.53 (m, 6H), 2.52 – 2.35 (m, 1H), 1.40 (d, *J* = 10.2 Hz, 3H).

**<sup>13</sup>C NMR (101 MHz, Chloroform-*d*)** δ 160.7 (dd, *J* = 242.9, 3.8 Hz), 137.0, 131.7 (dd, *J* = 17.5, 8.9 Hz), 131.2 (dd, *J* = 21.0, 2.5 Hz), 130.6 (t, *J* = 7.6 Hz), 128.8 (dd, *J* = 21.3, 10.1 Hz), 128.6 (dd, *J* = 148.0, 56.7 Hz), 114.6 (dd, *J* = 20.9, 2.8 Hz), 52.7 (dd, *J* = 47.4, 7.0 Hz), 9.5 (d, *J* = 37.3 Hz).

**<sup>11</sup>B NMR (128 MHz, Chloroform-*d*)** δ -25.98.

**<sup>31</sup>P NMR (162 MHz, Chloroform-*d*)** δ 38.37 (dd, *J* = 82.2, 5.7 Hz), 5.50.

**<sup>19</sup>F NMR (376 MHz, Chloroform-*d*)** δ -118.73 (t, *J* = 4.6 Hz).

**HRMS (ESI):** calc'd for (M+H)<sup>+</sup> C<sub>22</sub>H<sub>27</sub>BF<sub>3</sub>O<sub>3</sub>P<sub>2</sub><sup>+</sup> 431.1507, found 431.1507.



**HPLC analysis:** DAICEL CHIRALCEL AD-H, hexane/isopropanol = 80/20, 1 mL/min,  $\lambda = 254$  nm,  $t_R$  (major) = 9.875 min,  $t_R$  (minor) = 8.944 min, 92% ee.

$[\alpha]_D^{25}$ : +53.0 ( $c$  0.5,  $\text{CHCl}_3$ ).

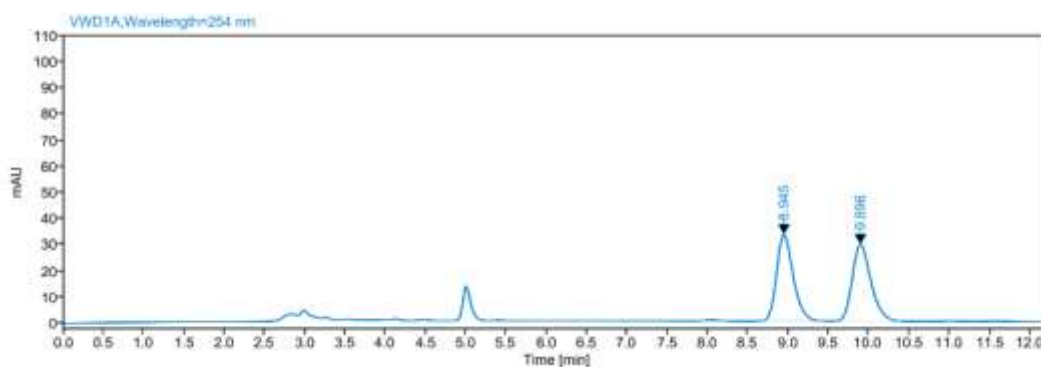

Signal: VWD1A,Wavelength=254 nm

| RT [min] | Type | Width [min] | Area   | Height | Area% | Name |
|----------|------|-------------|--------|--------|-------|------|
| 8.945    | BB   | 1.06        | 477.88 | 33.04  | 50.09 |      |
| 9.896    | BB   | 1.15        | 476.23 | 29.28  | 49.91 |      |
| Sum      |      |             | 954.11 |        |       |      |

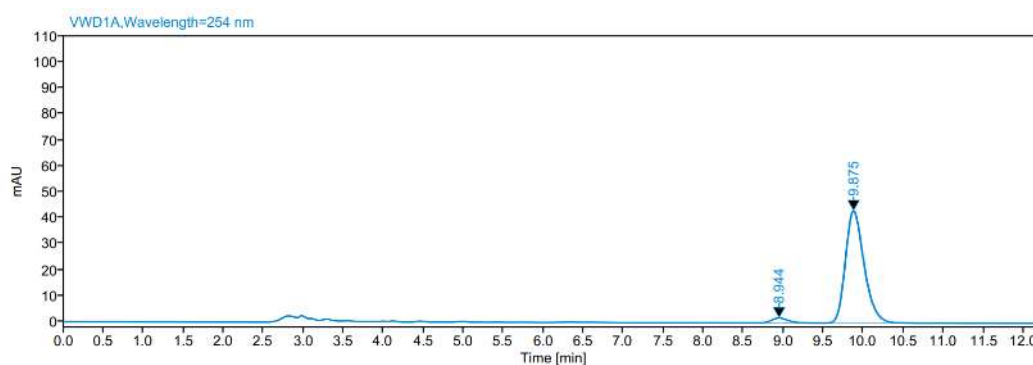

Signal: VWD1A,Wavelength=254 nm

| RT [min] | Type | Width [min] | Area   | Height | Area% | Name |
|----------|------|-------------|--------|--------|-------|------|
| 8.944    | BB   | 0.86        | 27.76  | 1.92   | 3.79  |      |
| 9.875    | BB   | 1.30        | 704.36 | 43.26  | 96.21 |      |
| Sum      |      |             | 732.12 |        |       |      |

**(S)-dimethyl(((methylphenylphosphane)boryl)(4-bromophenyl)methyl)phosphonate(3ja)**

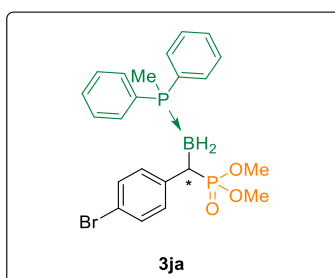

Following the general procedure D, dimethyl ((4-bromophenyl)(diazo)methyl)phosphonate (0.20

mmol, 1.0 equiv) and methyldiphenylphosphane borane (0.40 mmol, 2.0 equiv) were employed and stirred at 20 °C for 12 h to afford **3ja** as a white solid in 76% yield (74.4 mg) with 94% ee.

**mp:** 132.0 –132.9 °C

**R<sub>f</sub>**= 0.58 (silica gel, EtOAc:PE = 3:1).

**<sup>1</sup>H NMR (500 MHz, Chloroform-*d*)** δ 7.51 – 7.38 (m, 8H), 7.36 – 7.31 (m, 2H), 7.17 – 7.13 (m, 2H), 7.00 – 6.96 (m, 2H), 3.60 (dd, *J* = 13.6, 10.5 Hz, 6H), 2.48 – 2.36 (m, 1H), 1.45 (d, *J* = 10.2 Hz, 3H).

**<sup>13</sup>C NMR (126 MHz, Chloroform-*d*)** δ 140.7 (dd, *J* = 9.0, 5.5 Hz), 131.7 (dd, *J* = 24.9, 9.0 Hz), 131.3 (d, *J* = 2.6 Hz), 131.1, 131.0 (d, *J* = 5.3 Hz), 130.9 (d, *J* = 2.8 Hz), 128.8 (dd, *J* = 23.7, 10.0 Hz), 128.4 (dd, *J* = 162.0, 57.2 Hz), 118.6 (d, *J* = 4.4 Hz), 52.7 (dd, *J* = 61.1, 7.0 Hz), 9.5 (d, *J* = 37.3 Hz).

**<sup>11</sup>B NMR (160 MHz, Chloroform-*d*)** δ -26.68.

**<sup>31</sup>P NMR (202 MHz, Chloroform-*d*)** δ 38.33 (d, *J* = 78.7 Hz), 5.98.

**HRMS (ESI):** calc'd for (M+H)<sup>+</sup> C<sub>22</sub>H<sub>27</sub>BBrO<sub>3</sub>P<sub>2</sub><sup>+</sup> 491.0706, found 491.0706.

**HPLC analysis:** DAICEL CHIRALCEL ID-3, hexane/isopropanol = 80/20, 1 mL/min, λ = 254 nm, t<sub>R</sub> (major) = 25.949 min, t<sub>R</sub> (minor) = 28.827 min, 94% ee.

**[α]<sub>D</sub><sup>25</sup>:** +92.0 (*c* 0.5, CHCl<sub>3</sub>).

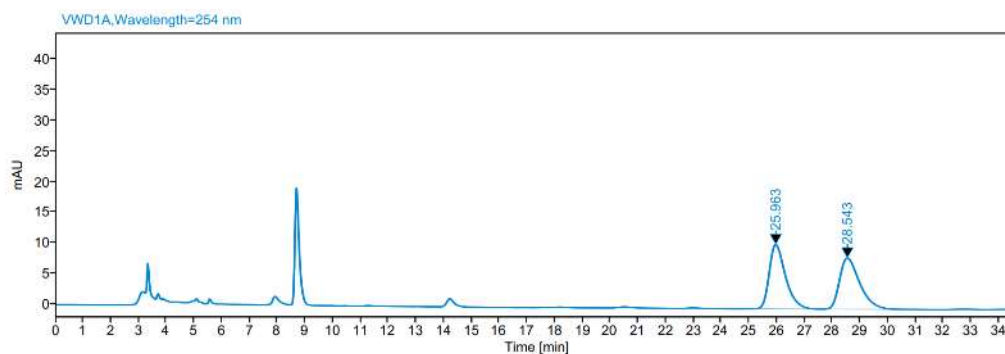

Signal: VWD1A,Wavelength=254 nm

| RT [min] | Type | Width [min] | Area          | Height | Area% | Name |
|----------|------|-------------|---------------|--------|-------|------|
| 25.963   | BB   | 2.51        | 427.93        | 10.48  | 50.36 |      |
| 28.543   | BB   | 3.15        | 421.83        | 8.33   | 49.64 |      |
|          |      | <b>Sum</b>  | <b>849.76</b> |        |       |      |

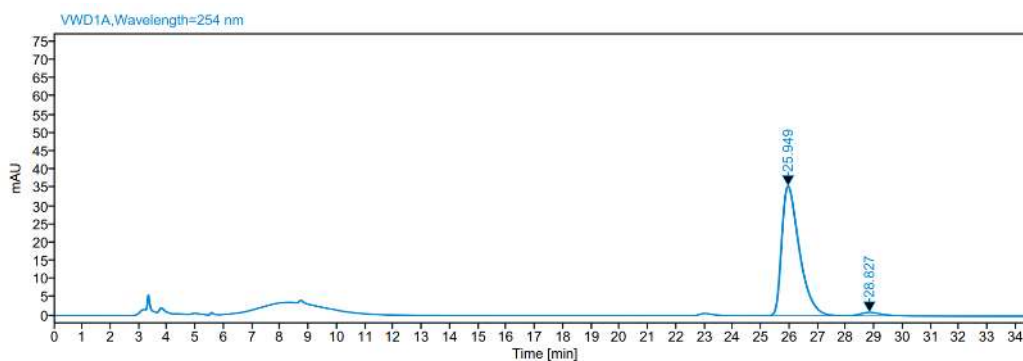

Signal: VWD1A,Wavelength=254 nm

| RT [min] | Type       | Width [min] | Area           | Height | Area% | Name |
|----------|------------|-------------|----------------|--------|-------|------|
| 25.949   | BB         | 3.13        | 1533.38        | 35.49  | 97.15 |      |
| 28.827   | MM m       | 2.23        | 44.99          | 0.92   | 2.85  |      |
|          | <b>Sum</b> |             | <b>1578.37</b> |        |       |      |

**(S)-dimethyl(((methylphenylphosphane)boryl)(4-(trifluoromethyl)phenyl)methyl) phosphonate(3ka)**

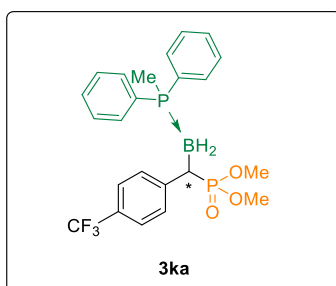

Following the general procedure D, dimethyl (diazo(4-(trifluoromethyl)phenyl)methyl) phosphonate (0.20 mmol, 1.0 equiv) and methylphenylphosphane borane (0.40 mmol, 2.0 equiv) were employed and stirred at 20 °C for 36 h to afford **3ka** as a colorless oil in 83% yield (80.0 mg) with 96% ee.

$R_f$  = 0.47 (silica gel, EtOAc:PE = 3:1).

$^1\text{H NMR}$  (400 MHz, Chloroform-*d*)  $\delta$  7.51 – 7.37 (m, 8H), 7.38 – 7.25 (m, 4H), 7.21 (d,  $J$  = 6.1 Hz, 2H), 3.63 (t,  $J$  = 9.9 Hz, 6H), 2.66 – 2.48 (m, 1H), 1.52 (d,  $J$  = 10.2 Hz, 3H).

$^{13}\text{C NMR}$  (101 MHz, Chloroform-*d*)  $\delta$  146.2, 131.7 (dd,  $J$  = 19.7, 9.0 Hz), 131.2 (dd,  $J$  = 17.6, 2.5 Hz), 129.4 (d,  $J$  = 7.8 Hz), 128.8 (dd,  $J$  = 14.9, 10.0 Hz), 128.3 (dd,  $J$  = 83.4, 57.2 Hz), 127.0 (dd,  $J$  = 32.2, 3.6 Hz), 124.7 (q,  $J$  = 3.5 Hz), 124.4 (d,  $J$  = 271.1 Hz), 52.8 (dd,  $J$  = 46.0, 7.1 Hz), 9.5 (d,  $J$  = 37.8 Hz).

$^{11}\text{B NMR}$  (128 MHz, Chloroform-*d*)  $\delta$  -26.03.

$^{31}\text{P NMR}$  (162 MHz, Chloroform-*d*)  $\delta$  37.34 (d,  $J$  = 78.7 Hz), 5.15.

$^{19}\text{F}$  NMR (376 MHz, Chloroform-*d*)  $\delta$  -62.18 (d,  $J$  = 2.8 Hz).

HRMS (ESI): calc'd for  $(\text{M}+\text{H})^+$   $\text{C}_{23}\text{H}_{27}\text{BF}_3\text{O}_3\text{P}_2^+$  481.1475, found 481.1474.

HPLC analysis: DAICEL CHIRALCEL ID-3, hexane/isopropanol = 85/15, 1 mL/min,  $\lambda$  = 254 nm,  $t_{\text{R}}$

(major) = 20.838 min,  $t_{\text{R}}$  (minor) = 22.634 min, 96% ee.

$[\alpha]_{\text{D}}^{25}$ : +51.4 ( $c$  0.5,  $\text{CHCl}_3$ ).

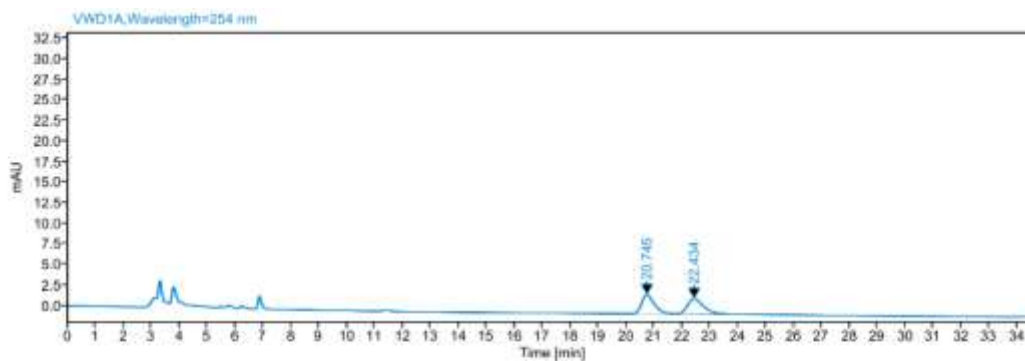

Signal: VWD1A, Wavelength=254 nm

| RT [min] | Type | Width [min] | Area   | Height | Area% | Name |
|----------|------|-------------|--------|--------|-------|------|
| 20.745   | BB   | 1.63        | 72.49  | 2.33   | 49.41 |      |
| 22.434   | BB   | 2.25        | 74.22  | 1.86   | 50.59 |      |
| Sum      |      |             | 146.71 |        |       |      |

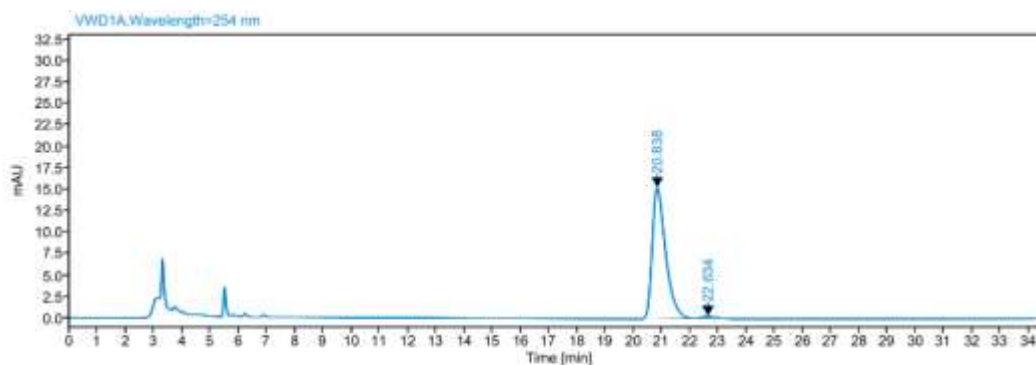

Signal: VWD1A, Wavelength=254 nm

| RT [min] | Type | Width [min] | Area   | Height | Area% | Name |
|----------|------|-------------|--------|--------|-------|------|
| 20.838   | BB   | 1.92        | 503.11 | 15.26  | 98.35 |      |
| 22.634   | MM m | 1.38        | 8.45   | 0.25   | 1.65  |      |
| Sum      |      |             | 511.56 |        |       |      |

**(S)-dimethyl(((methylphenylphosphane)boryl)([1,1'-biphenyl]-4-yl)methyl)phosphonate(3la)**

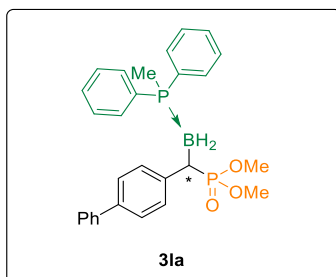

Following the general procedure D, dimethyl ([1,1'-biphenyl]-4-yl(diazo)methyl)phosphonate (0.20 mmol, 1.0 equiv) and methylphenylphosphane borane (0.40 mmol, 2.0 equiv) were employed and stirred at 20 °C for 12 h to afford **3la** as a colorless oil in 87% yield (84.9 mg) with 93% ee.

$R_f$  = 0.47 (silica gel, EtOAc:PE = 3:1).

$^1\text{H NMR}$  (400 MHz, Chloroform-*d*)  $\delta$  7.56 – 7.37 (m, 12H), 7.37 – 7.25 (m, 5H), 7.19 (dd,  $J$  = 8.3, 2.5 Hz, 2H), 3.64 (t,  $J$  = 9.9 Hz, 6H), 2.62 – 2.45 (m, 1H), 1.43 (d,  $J$  = 10.2 Hz, 3H).

$^{13}\text{C NMR}$  (101 MHz, Chloroform-*d*)  $\delta$  141.0 (d,  $J$  = 1.5 Hz), 140.7 (dd,  $J$  = 8.3, 5.8 Hz), 137.6 (d,  $J$  = 3.7 Hz), 131.8 (dd,  $J$  = 23.1, 8.9 Hz), 131.0 (dd,  $J$  = 25.6, 2.5 Hz), 129.7 (d,  $J$  = 7.8 Hz), 129.2, 128.7 (dd,  $J$  = 21.0, 10.0 Hz), 128.6, 128.0 (d,  $J$  = 55.7 Hz), 126.7, 126.7, 126.5 (d,  $J$  = 2.9 Hz), 52.7 (dd,  $J$  = 48.9, 7.0 Hz), 9.4 (d,  $J$  = 37.0 Hz).

$^{11}\text{B NMR}$  (128 MHz, Chloroform-*d*)  $\delta$  -25.86.

$^{31}\text{P NMR}$  (162 MHz, Chloroform-*d*)  $\delta$  38.54 (d,  $J$  = 81.9 Hz), 5.57.

**HRMS (ESI):** calc'd for (M+H)<sup>+</sup> C<sub>28</sub>H<sub>32</sub>BO<sub>3</sub>P<sub>2</sub><sup>+</sup> 489.1914, found 489.1914.

**HPLC analysis:** DAICEL CHIRALCEL AD-H, hexane/isopropanol = 70/30, 1 mL/min,  $\lambda$  = 254 nm,  $t_R$  (major) = 14.542 min,  $t_R$  (minor) = 8.101 min, 93% ee.

$[\alpha]_D^{25}$ : +84.5 ( $c$  0.5, CHCl<sub>3</sub>).

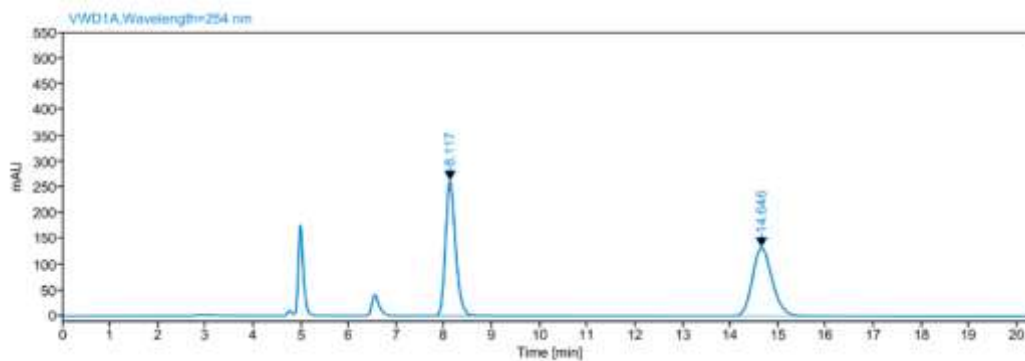

Signal: VWD1A, Wavelength=254 nm

| RT [min] | Type | Width [min] | Area    | Height | Area% | Name |
|----------|------|-------------|---------|--------|-------|------|
| 8.117    | BB   | 2.24        | 3840.68 | 261.37 | 50.03 |      |
| 14.646   | BB   | 2.60        | 3836.14 | 132.58 | 49.97 |      |
| Sum      |      |             | 7676.82 |        |       |      |

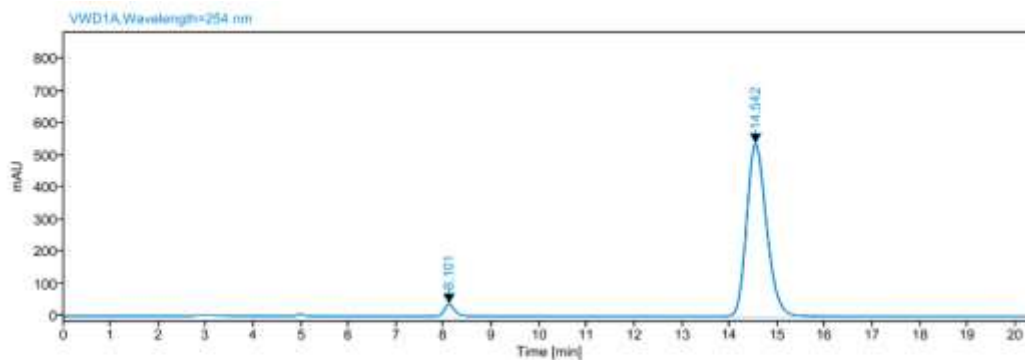

Signal: VWD1A, Wavelength=254 nm

| RT [min] | Type | Width [min] | Area     | Height | Area% | Name |
|----------|------|-------------|----------|--------|-------|------|
| 8.101    | BB   | 1.61        | 561.36   | 37.60  | 3.49  |      |
| 14.542   | BB   | 2.99        | 15539.46 | 535.21 | 96.51 |      |
| Sum      |      |             | 16100.81 |        |       |      |

**(S)-dimethyl(((methylphenylphosphane)boryl)(4-(benzyloxy)phenyl)methyl) phosphonate(3ma)**

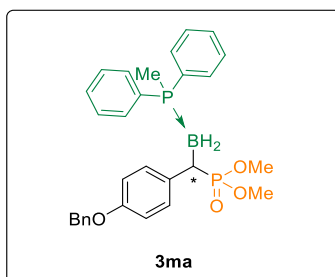

Following the general procedure D, dimethyl ((4-(benzyloxy)phenyl)(diazo)methyl)phosphonate (0.20 mmol, 1.0 equiv) and methylphenylphosphane borane (0.40 mmol, 2.0 equiv) were employed and stirred at 20 °C for 12 h to afford **3ma** as a colorless oil in 85% yield (88.1 mg) with 90% ee.

$R_f$  = 0.37 (silica gel, EtOAc:PE = 3:1).

**<sup>1</sup>H NMR (400 MHz, Chloroform-*d*)** δ 7.52 – 7.27 (m, 15H), 7.03 (dd, *J* = 8.6, 2.6 Hz, 2H), 6.74 (d, *J* = 8.2 Hz, 2H), 4.99 (s, 2H), 3.60 (dd, *J* = 16.3, 10.4 Hz, 6H), 2.49 – 2.32 (m, 1H), 1.32 (d, *J* = 10.2 Hz, 3H).

**<sup>13</sup>C NMR (101 MHz, Chloroform-*d*)** δ 156.4 (d, *J* = 3.5 Hz), 137.2, 133.3 (dd, *J* = 8.9, 5.7 Hz), 131.7 (dd, *J* = 19.1, 8.9 Hz), 131.0 (dd, *J* = 22.4, 2.5 Hz), 130.2 (d, *J* = 7.6 Hz), 129.6 (d, *J* = 58.4 Hz), 128.7 (dd, *J* = 23.0, 10.0 Hz), 128.4, 127.8 (d, *J* = 55.3 Hz), 127.7, 127.4, 114.5 (d, *J* = 2.9 Hz), 69.8, 52.6 (dd, *J* = 48.1, 7.0 Hz), 9.3 (d, *J* = 36.8 Hz).

**<sup>11</sup>B NMR (128 MHz, Chloroform-*d*)** δ -25.98.

**<sup>31</sup>P NMR (162 MHz, Chloroform-*d*)** δ 39.14 (d, *J* = 85.2 Hz), 5.75.

**HRMS (ESI):** calc'd for (M+H)<sup>+</sup> C<sub>29</sub>H<sub>34</sub>BO<sub>4</sub>P<sub>2</sub><sup>+</sup> 519.2020 found 519.2020.

**HPLC analysis:** DAICEL CHIRALCEL AD-H, hexane/isopropanol = 80/20, 1 mL/min, λ = 254 nm, t<sub>R</sub> (major) = 17.916 min, t<sub>R</sub> (minor) = 15.814 min, 90% ee.

**[α]<sub>D</sub><sup>25</sup>:** +76.4(c 0.5, CHCl<sub>3</sub>).

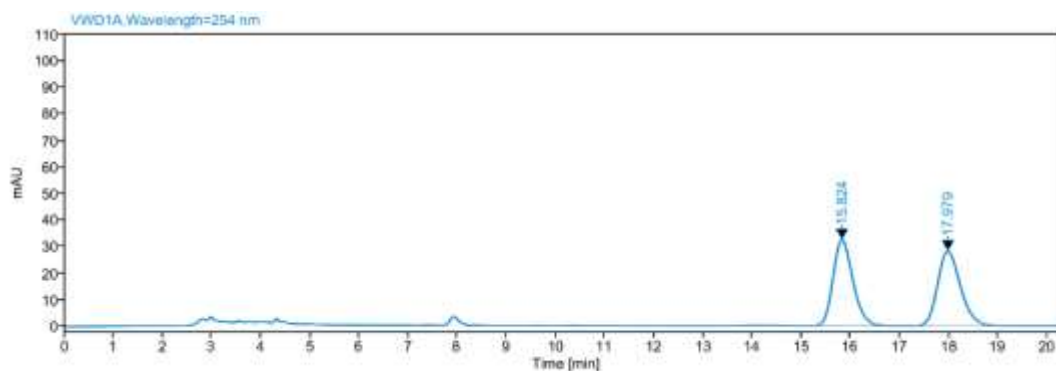

| Signal: VWD1A, Wavelength=254 nm |      |             |                |        |       |      |
|----------------------------------|------|-------------|----------------|--------|-------|------|
| RT [min]                         | Type | Width [min] | Area           | Height | Area% | Name |
| 15.824                           | BB   | 1.99        | 909.69         | 32.39  | 49.98 |      |
| 17.979                           | BB   | 2.41        | 910.25         | 28.13  | 50.02 |      |
|                                  |      | <b>Sum</b>  | <b>1819.94</b> |        |       |      |

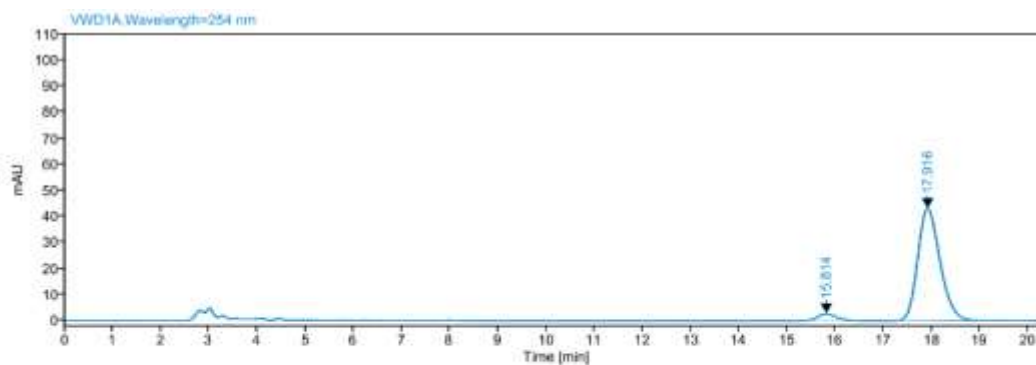

Signal: VWD1A,Wavelength=254 nm

| RT [min] | Type | Width [min] | Area    | Height | Area% | Name |
|----------|------|-------------|---------|--------|-------|------|
| 15.814   | BB   | 1.53        | 74.00   | 2.67   | 5.07  |      |
| 17.916   | BB   | 1.91        | 1384.51 | 43.02  | 94.93 |      |
| Sum      |      |             | 1458.52 |        |       |      |

**(S)-dimethyl(((methylphenylphosphane)boryl)(4-cyanophenyl)methyl)phosphonate(3na)**

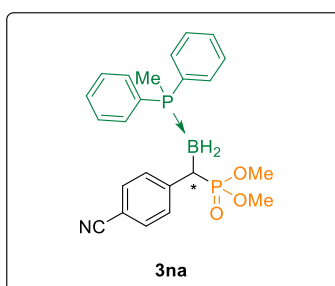

Following the general procedure D, dimethyl ((4-cyanophenyl)(diazo)methyl)phosphonate (0.20 mmol, 1.0 equiv) and methylphenylphosphane borane (0.40 mmol, 2.0 equiv) were employed and stirred at 20 °C for 48 h to afford **3na** as a white solid in 80% yield (70.3 mg) with 96% ee.

**mp:** 110.2 –111.5 °C

**R<sub>f</sub>** = 0.33 (silica gel, EtOAc:PE = 3:1).

**<sup>1</sup>H NMR (500 MHz, Chloroform-*d*)** δ 7.51 – 7.37 (m, 8H), 7.36 – 7.28 (m, 4H), 7.18 (dd, *J* = 8.3, 2.3 Hz, 2H), 3.61 (t, *J* = 9.6 Hz, 6H), 2.59 – 2.46 (m, 1H), 1.52 (d, *J* = 10.2 Hz, 3H).

**<sup>13</sup>C NMR (126 MHz, Chloroform-*d*)** δ 148.2 (t, *J* = 7.3 Hz), 131.7 (d, *J* = 8.8 Hz), 131.6 (d, *J* = 8.9 Hz), 131.3 (dd, *J* = 21.5, 2.5 Hz), 129.9 (d, *J* = 7.7 Hz), 128.9 (dd, *J* = 19.0, 10.0 Hz), 128.1 (dd, *J* = 102.2, 57.6 Hz), 119.3, 108.3, 52.8 (dd, *J* = 55.3, 6.9 Hz), 9.5 (d, *J* = 38.0 Hz).

**<sup>11</sup>B NMR (128 MHz, Chloroform-*d*)** δ -26.18.

**<sup>31</sup>P NMR (202 MHz, Chloroform-*d*)** δ 37.21 (d, *J* = 75.1 Hz), 5.60.

**HRMS (ESI):** calc'd for (M+H)<sup>+</sup> C<sub>23</sub>H<sub>27</sub>BNO<sub>3</sub>P<sub>2</sub><sup>+</sup> 438.1554, found 438.1554.

**HPLC analysis:** DAICEL CHIRALCEL AD-H, hexane/isopropanol = 80/20, 1 mL/min, λ = 254 nm, t<sub>R</sub> (major) = 16.937 min, t<sub>R</sub> (minor) = 15.614 min, 96% ee.



$[\alpha]_D^{25}$ : +48.2 (*c* 0.5, CHCl<sub>3</sub>).

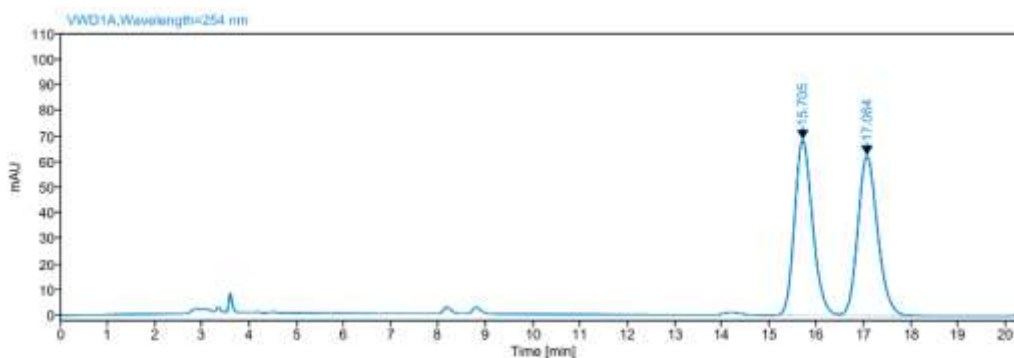

Signal: VWD1A, Wavelength=254 nm

| RT [min] | Type | Width [min] | Area    | Height | Area% | Name |
|----------|------|-------------|---------|--------|-------|------|
| 15.705   | BV   | 1.45        | 1813.97 | 68.51  | 49.95 |      |
| 17.064   | VB   | 3.01        | 1817.65 | 62.43  | 50.05 |      |
| Sum      |      |             | 3631.62 |        |       |      |

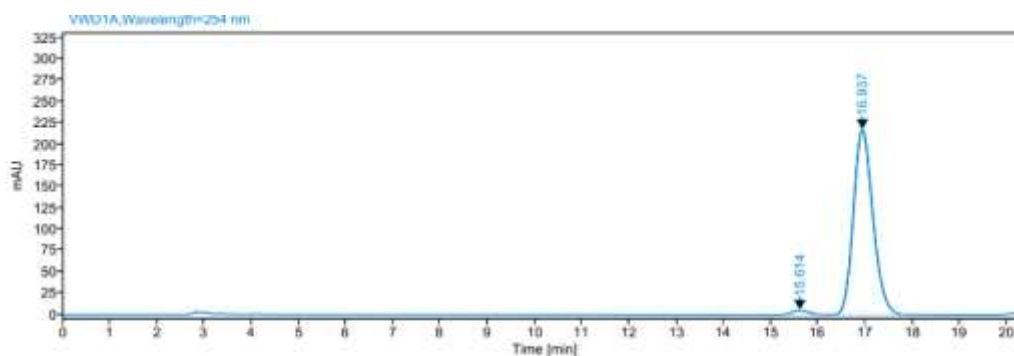

Signal: VWD1A, Wavelength=254 nm

| RT [min] | Type | Width [min] | Area    | Height | Area% | Name |
|----------|------|-------------|---------|--------|-------|------|
| 15.614   | BB   | 1.21        | 138.96  | 5.44   | 2.17  |      |
| 16.937   | BB   | 2.40        | 6263.30 | 217.46 | 97.83 |      |
| Sum      |      |             | 6402.26 |        |       |      |

(S)-dimethyl(((methylphenylphosphane)boryl)(3-methoxyphenyl)methyl)phosphonate(**3oa**)

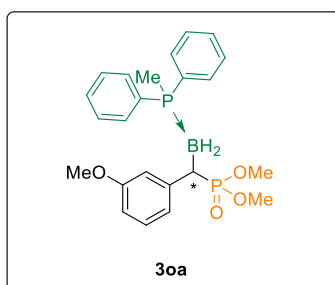

Following the general procedure D, dimethyl ((3-methoxyphenyl)(di-*tert*-butylamino)methyl)phosphonate (0.20 mmol, 1.0 equiv) and methylphenylphosphane borane (0.40 mmol, 2.0 equiv) were employed and stirred at 20 °C for 12 h to afford **3oa** as a colorless oil in 88% yield (78.2 mg) with 94% ee.

$R_f$  = 0.33 (silica gel, EtOAc:PE = 3:1)

**<sup>1</sup>H NMR (400 MHz, Chloroform-*d*)**  $\delta$  7.51 – 7.38 (m, 8H), 7.37 – 7.30 (m, 2H), 7.01 (t, *J* = 8.1 Hz, 1H), 6.69 (dd, *J* = 4.6, 2.3 Hz, 2H), 6.62 – 6.54 (m, 1H), 3.68 (s, 3H), 3.62 (t, *J* = 10.6 Hz, 6H), 2.54 – 2.36 (m, 1H), 1.35 (d, *J* = 10.3 Hz, 3H).

**<sup>13</sup>C NMR (101 MHz, Chloroform-*d*)**  $\delta$  159.2 (d, *J* = 2.7 Hz), 142.7 (dd, *J* = 8.7, 5.1 Hz), 131.8 (dd, *J* = 24.5, 8.9 Hz), 131.2 (dd, *J* = 24.8, 2.5 Hz), 129.6 (d, *J* = 57.5 Hz), 128.8 (d, *J* = 2.6 Hz), 128.8 (dd, *J* = 25.4, 10.0 Hz), 127.8 (d, *J* = 55.4 Hz), 121.9 (d, *J* = 8.0 Hz), 114.7 (d, *J* = 7.7 Hz), 111.1 (d, *J* = 3.4 Hz), 55.0, 52.9 (dd, *J* = 48.8, 7.1 Hz), 9.3 (d, *J* = 37.0 Hz).

**<sup>11</sup>B NMR (128 MHz, Chloroform-*d*)**  $\delta$  -26.15.

**<sup>31</sup>P NMR (162 MHz, Chloroform-*d*)**  $\delta$  38.78 (d, *J* = 84.8 Hz), 5.54.

**HRMS (ESI):** calc'd for (M+H)<sup>+</sup> C<sub>23</sub>H<sub>30</sub>BO<sub>4</sub>P<sub>2</sub><sup>+</sup> 443.1707, found 443.1714.

**HPLC analysis:** DAICEL CHIRALCEL IA-3, hexane/isopropanol = 70/30, 1 mL/min,  $\lambda$  = 254 nm, *t<sub>R</sub>* (major) = 13.742 min, *t<sub>R</sub>* (minor) = 8.597 min, 94% ee.

**[ $\alpha$ ]<sub>D</sub><sup>25</sup>:** +42.8 (*c* 0.5, CHCl<sub>3</sub>).

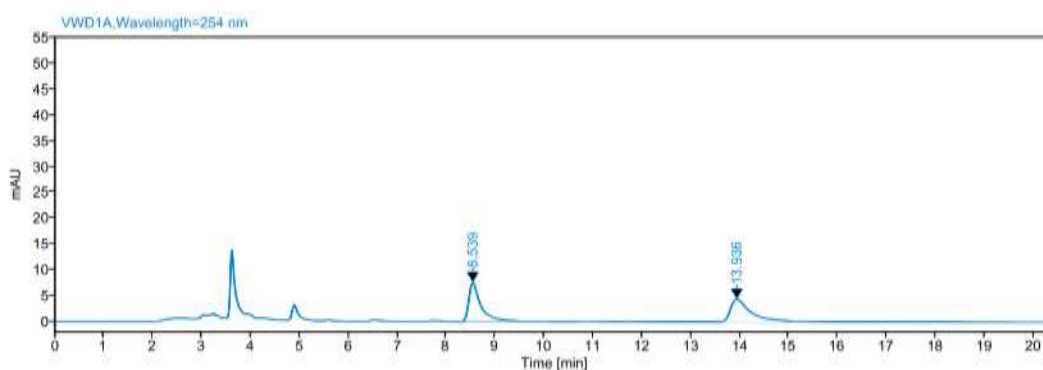

Signal: VWD1A, Wavelength=254 nm

| RT [min] | Type | Width [min] | Area          | Height | Area% | Name |
|----------|------|-------------|---------------|--------|-------|------|
| 8.539    | MM m | 2.27        | 129.68        | 7.49   | 49.95 |      |
| 13.936   | MM m | 2.56        | 129.96        | 4.34   | 50.05 |      |
|          |      | <b>Sum</b>  | <b>259.64</b> |        |       |      |

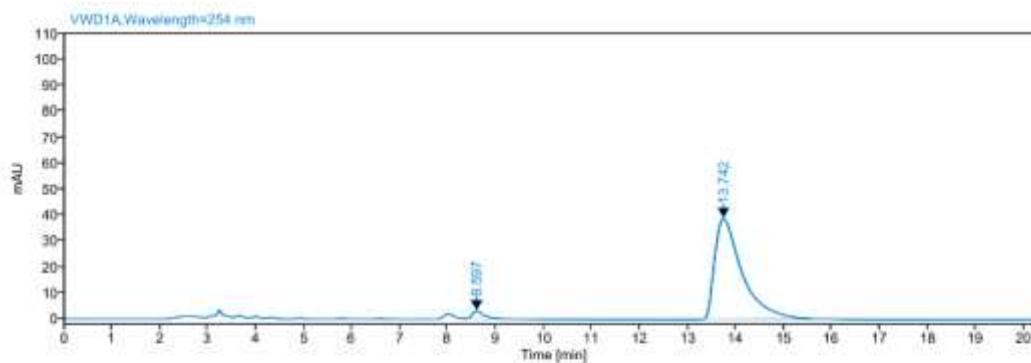

Signal: VWD1A,Wavelength=254 nm

| RT [min] | Type | Width [min] | Area    | Height | Area% | Name |
|----------|------|-------------|---------|--------|-------|------|
| 8.597    | MM m | 0.97        | 49.48   | 3.03   | 3.10  |      |
| 13.742   | MM m | 3.41        | 1548.09 | 38.99  | 96.90 |      |
| Sum      |      |             | 1597.58 |        |       |      |

**(S)-methyl-3-(((methylphenylphosphane)boryl) (dimethoxyphosphoryl)methyl)benzoate (3pa)**

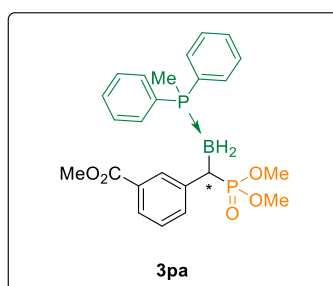

Following the general procedure D, methyl 3-(diazodimethylphosphoryl)methylbenzoate (0.20 mmol, 1.0 equiv) and methylphenylphosphane borane (0.40 mmol, 2.0 equiv) were employed and stirred at 20 °C for 12 h to afford **3pa** as a colorless oil in 85% yield (79.9 mg) with 94% ee.

$R_f$  = 0.33 (silica gel, EtOAc:PE = 3:1)

$^1\text{H}$  NMR (400 MHz, Chloroform-*d*)  $\delta$  7.70 – 7.62 (m, 2H), 7.50 – 7.36 (m, 9H), 7.35 – 7.26 (m, 2H), 7.16 (t,  $J$  = 7.7 Hz, 1H), 3.84 (s, 3H), 3.60 (dd,  $J$  = 10.5, 5.0 Hz, 6H), 2.59 – 2.44 (m, 1H), 1.42 (d,  $J$  = 10.1 Hz, 3H).

$^{13}\text{C}$  NMR (101 MHz, Chloroform-*d*)  $\delta$  167.2, 140.5 (dd,  $J$  = 8.8, 5.6 Hz), 134.1 (d,  $J$  = 6.8 Hz), 131.7 (dd,  $J$  = 15.3, 8.9 Hz), 131.1 (dd,  $J$  = 18.7, 2.5 Hz), 130.4 (d,  $J$  = 8.5 Hz), 129.6 (d,  $J$  = 2.5 Hz), 129.1 (d,  $J$  = 57.9 Hz), 128.8 (dd,  $J$  = 19.4, 10.1 Hz), 128.0 (d,  $J$  = 2.8 Hz), 127.9 (d,  $J$  = 56.2 Hz), 126.3 (d,  $J$  = 3.3 Hz), 52.7 (dd,  $J$  = 46.4, 7.0 Hz), 51.8, 9.5 (d,  $J$  = 37.4 Hz).

$^{11}\text{B}$  NMR (128 MHz, Chloroform-*d*)  $\delta$  -25.93.

$^{31}\text{P}$  NMR (162 MHz, Chloroform-*d*)  $\delta$  37.85 (d,  $J$  = 79.1 Hz), 5.34.

HRMS (ESI): calc'd for (M+H)<sup>+</sup> C<sub>24</sub>H<sub>30</sub>BO<sub>5</sub>P<sub>2</sub><sup>+</sup> 471.1656, found 471.1655.

**HPLC analysis:** DAICEL CHIRALCEL IA-3, hexane/isopropanol = 80/20, 1 mL/min,  $\lambda = 254$  nm,  $t_R$

(major) = 21.276min,  $t_R$  (minor) = 12.364 min, 94% ee.

$[\alpha]_D^{25}$ : +30.6 ( $c$  0.5,  $\text{CHCl}_3$ ).

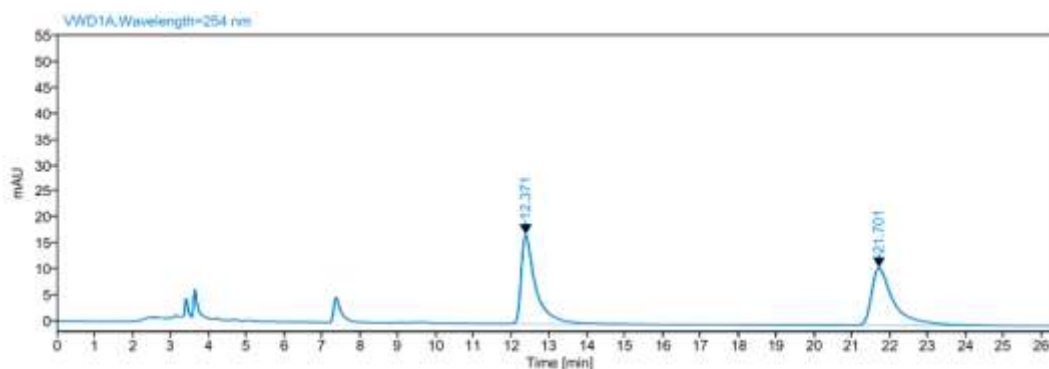

Signal: VWD1A,Wavelength=254 nm

| RT [min] | Type | Width [min] | Area   | Height | Area% | Name |
|----------|------|-------------|--------|--------|-------|------|
| 12.371   | BB   | 3.85        | 460.69 | 17.15  | 50.43 |      |
| 21.701   | BB   | 3.99        | 452.82 | 11.04  | 49.57 |      |
|          | Sum  |             | 913.50 |        |       |      |

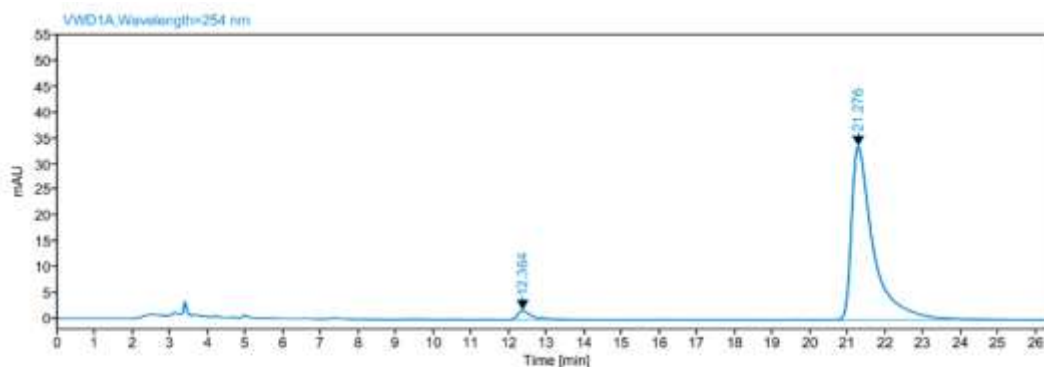

Signal: VWD1A,Wavelength=254 nm

| RT [min] | Type | Width [min] | Area    | Height | Area% | Name |
|----------|------|-------------|---------|--------|-------|------|
| 12.364   | BB   | 1.83        | 45.19   | 1.75   | 3.24  |      |
| 21.276   | BB   | 4.75        | 1347.88 | 33.63  | 96.76 |      |
|          | Sum  |             | 1393.07 |        |       |      |

**(S)-dimethyl(((methylphenylphosphane)boryl)(3-iodophenyl)methyl)phosphonate(3qa)**

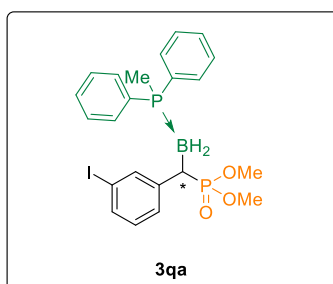

Following the general procedure D, dimethyl (diazo(3-iodophenyl)methyl)phosphonate (0.20 mmol, 1.0 equiv) and methylphenylphosphane borane (0.40 mmol, 2.0 equiv) were employed and stirred

at 20 °C for 12 h to afford **3qa** as a colorless oil in 79% yield (84.7 mg) with 95% ee.

$R_f$  = 0.47 (silica gel, EtOAc:PE = 3:1)

$^1\text{H NMR}$  (400 MHz, Chloroform-*d*)  $\delta$  7.53 – 7.39 (m, 8H), 7.38 – 7.30 (m, 3H), 7.27 (d,  $J$  = 2.1 Hz, 1H), 7.18 (d,  $J$  = 7.8 Hz, 1H), 6.82 (t,  $J$  = 7.8 Hz, 1H), 3.61 (dd,  $J$  = 10.6, 4.2 Hz, 6H), 2.44 – 2.28 (m, 1H), 1.41 (d,  $J$  = 10.2 Hz, 3H).

$^{13}\text{C NMR}$  (101 MHz, Chloroform-*d*)  $\delta$  144.1 (dd,  $J$  = 8.4, 5.5 Hz), 138.0 (d,  $J$  = 8.7 Hz), 134.0 (d,  $J$  = 3.5 Hz), 131.7 (dd,  $J$  = 15.7, 8.9 Hz), 131.3 (dd,  $J$  = 15.7, 2.5 Hz), 129.7 (d,  $J$  = 2.9 Hz), 129.0 (d,  $J$  = 58.2 Hz), 128.8 (dd,  $J$  = 23.2, 10.0 Hz), 128.6 (d,  $J$  = 7.1 Hz), 127.6 (d,  $J$  = 56.0 Hz), 94.0 (d,  $J$  = 3.0 Hz), 52.8 (dd,  $J$  = 45.3, 7.1 Hz), 9.5 (d,  $J$  = 37.7 Hz).

$^{11}\text{B NMR}$  (128 MHz, Chloroform-*d*)  $\delta$  -25.96.

$^{31}\text{P NMR}$  (162 MHz, Chloroform-*d*)  $\delta$  37.71 (d,  $J$  = 81.2 Hz), 5.34.

**HRMS (ESI):** calc'd for (M+H)<sup>+</sup> C<sub>22</sub>H<sub>27</sub>BIO<sub>3</sub>P<sub>2</sub><sup>+</sup> 539.0568, found 539.0586.

**HPLC analysis:** DAICEL CHIRALCEL IA-3, hexane/isopropanol = 85/15, 1 mL/min,  $\lambda$  = 254 nm,  $t_R$  (major) = 15.157 min,  $t_R$  (minor) = 12.817 min, 95% ee.

$[\alpha]_D^{25}$ : +37.6 (*c* 0.5, CHCl<sub>3</sub>).

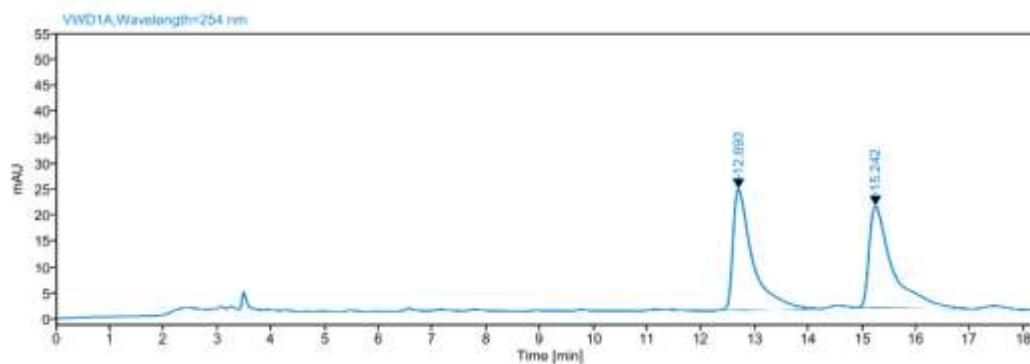

| Signal: VWD1A,Wavelength=254 nm |      |             |         |        |       |      |
|---------------------------------|------|-------------|---------|--------|-------|------|
| RT [min]                        | Type | Width [min] | Area    | Height | Area% | Name |
| 12.693                          | BB   | 2.04        | 591.94  | 23.32  | 50.24 |      |
| 15.242                          | BB   | 2.13        | 586.17  | 19.54  | 49.76 |      |
| Sum                             |      |             | 1178.10 |        |       |      |

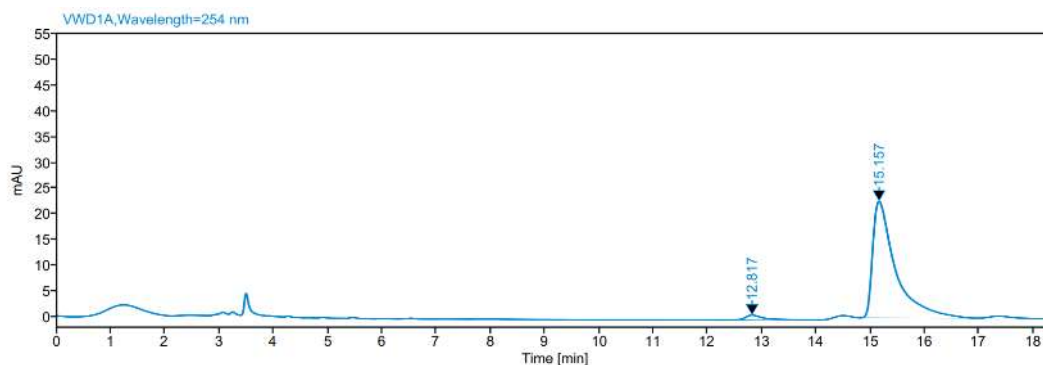

Signal: VWD1A,Wavelength=254 nm

| RT [min] | Type | Width [min] | Area   | Height | Area% | Name |
|----------|------|-------------|--------|--------|-------|------|
| 12.817   | MM m | 0.88        | 17.51  | 0.89   | 2.57  |      |
| 15.157   | BB   | 2.16        | 662.94 | 22.70  | 97.43 |      |
| Sum      |      |             | 680.44 |        |       |      |

**(S)-dimethyl(((methylphenylphosphane)boryl)(2-fluorophenyl)methyl)phosphonate(3ra)**

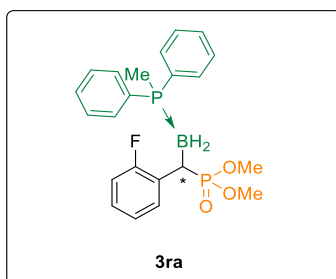

Following the general procedure D, dimethyl (diazo(2-fluorophenyl)methyl)phosphonate (0.20 mmol, 1.0 equiv) and methylphenylphosphane borane (0.40 mmol, 2.0 equiv) were employed and stirred at 20 °C for 12 h to afford **3ra** as a white solid in 90% yield (77.1 mg) with 95% ee.

**mp:** 119.3 –120.6 °C

**R<sub>f</sub>** = 0.53 (silica gel, EtOAc:PE = 3:1)

**<sup>1</sup>H NMR (500 MHz, Chloroform-*d*)** δ 7.65 – 7.60 (m, 1H), 7.50 – 7.34 (m, 8H), 7.31 – 7.26 (m, 2H), 6.94 – 6.87 (m, 2H), 6.75 – 6.64 (m, 1H), 3.59 (dd, *J* = 10.5, 6.5 Hz, 6H), 3.03 – 2.89 (m, 1H), 1.58 (d, *J* = 10.2 Hz, 3H).

**<sup>13</sup>C NMR (101 MHz, Chloroform-*d*)** δ 160.7 (d, *J* = 9.7 Hz), 158.3 (d, *J* = 9.9 Hz), 131.7 (dd, *J* = 11.9, 9.0 Hz), 131.0 (dd, *J* = 18.7, 2.5 Hz), 128.9, 128.7 (dd, *J* = 18.0, 10.0 Hz), 128.2 (d, *J* = 14.4 Hz), 126.1 (dd, *J* = 8.2, 3.5 Hz), 123.7 (t, *J* = 3.5 Hz), 114.2 (dd, *J* = 23.6, 2.6 Hz), 52.6 (dd, *J* = 44.9, 6.9 Hz), 9.0 (d, *J* = 37.5 Hz).

**<sup>11</sup>B NMR (160 MHz, Chloroform-*d*)** δ -26.96.

<sup>31</sup>P NMR (202 MHz, Chloroform-*d*) δ 38.75 (d, *J* = 80.8 Hz), 5.78.

<sup>19</sup>F NMR (471 MHz, Chloroform-*d*) δ -119.96.

HRMS (ESI): calc'd for (M+H)<sup>+</sup> C<sub>22</sub>H<sub>27</sub>BFO<sub>3</sub>P<sub>2</sub><sup>+</sup> 431.1507, found 431.1519.

HPLC analysis: DAICEL CHIRALCEL AS-H, hexane/isopropanol = 80/20, 1 mL/min, λ = 254 nm,

t<sub>R</sub> (major) = 26.975 min, t<sub>R</sub> (minor) = 10.328 min, 95% ee.

[α]<sub>D</sub><sup>25</sup>: +40.2 (c 0.5, CHCl<sub>3</sub>).

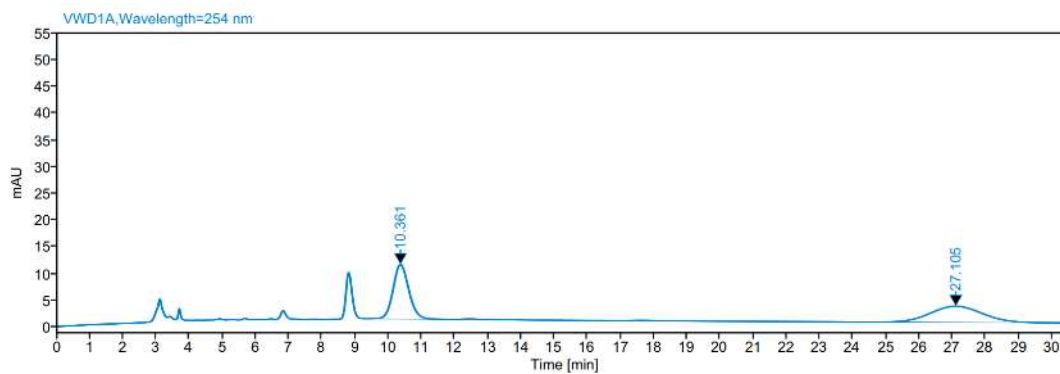

Signal: VWD1A, Wavelength=254 nm

| RT [min] | Type | Width [min] | Area   | Height | Area% | Name |
|----------|------|-------------|--------|--------|-------|------|
| 10.361   | BB   | 2.47        | 336.94 | 10.21  | 50.47 |      |
| 27.105   | BB   | 5.14        | 330.63 | 3.03   | 49.53 |      |
|          |      | Sum         | 667.57 |        |       |      |

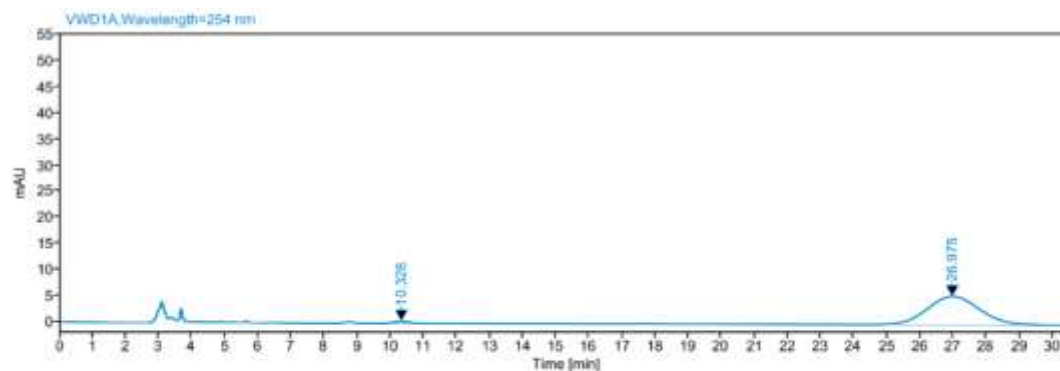

Signal: VWD1A, Wavelength=254 nm

| RT [min] | Type | Width [min] | Area   | Height | Area% | Name |
|----------|------|-------------|--------|--------|-------|------|
| 10.328   | MM m | 2.04        | 14.29  | 0.45   | 2.36  |      |
| 26.975   | BB   | 5.40        | 591.35 | 5.44   | 97.64 |      |
|          |      | Sum         | 605.64 |        |       |      |

**(S)-dimethyl(((methyl-diphenylphosphane)boryl)(3-chloro-4-fluorophenyl)methyl)  
phosphonate(3sa)**

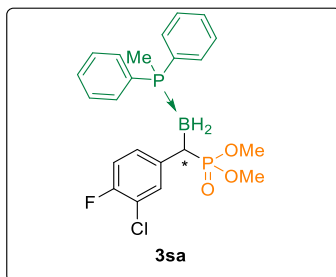

Following the general procedure D, dimethyl ((3-chloro-4-fluorophenyl)(diazomethyl)phosphonate (0.20 mmol, 1.0 equiv) and methyl-diphenylphosphane borane (0.40 mmol, 2.0 equiv) were employed and stirred at 20 °C for 12 h to afford **3sa** as a white solid in 88% yield (82.1 mg) with 94% ee.

**mp:** 132.0 –132.9 °C

**R<sub>f</sub>** = 0.28 (silica gel, EtOAc:PE = 3:1)

**<sup>1</sup>H NMR (400 MHz, Chloroform-*d*)** δ 7.51 – 7.38 (m, 8H), 7.37 – 7.30 (m, 2H), 7.06 – 6.96 (m, 2H), 6.80 (t, *J* = 8.8 Hz, 1H), 3.62 (dd, *J* = 10.5, 5.5 Hz, 6H), 2.51 – 2.31 (m, 1H), 1.53 (d, *J* = 10.2 Hz, 3H).

**<sup>13</sup>C NMR (101 MHz, Chloroform-*d*)** δ 157.0 (d, *J* = 3.9 Hz), 154.5 (d, *J* = 3.9 Hz), 138.6, 131.7 (dd, *J* = 14.3, 9.0 Hz), 131.3 (dd, *J* = 16.2, 2.5 Hz), 131.0 (d, *J* = 8.1 Hz), 128.8 (dd, *J* = 17.7, 10.0 Hz), 128.5 (d, *J* = 34.3 Hz), 127.8 (d, *J* = 56.6 Hz), 119.8 (dd, *J* = 17.4, 3.1 Hz), 115.7 (dd, *J* = 20.6, 2.9 Hz), 52.8 (dd, *J* = 43.4, 7.0 Hz), 9.6 (d, *J* = 37.8 Hz).

**<sup>11</sup>B NMR (128 MHz, Chloroform-*d*)** δ -26.10.

**<sup>31</sup>P NMR (162 MHz, Chloroform-*d*)** δ 37.49 (dd, *J* = 79.2, 5.8 Hz), 5.16.

**<sup>19</sup>F NMR (376 MHz, Chloroform-*d*)** δ -121.19 (d, *J* = 5.6 Hz).

**HRMS (ESI):** calc'd for (M+H)<sup>+</sup> C<sub>22</sub>H<sub>26</sub>BClFO<sub>3</sub>P<sub>2</sub><sup>+</sup> 465.1117, found 465.1110.

**HPLC analysis:** DAICEL CHIRALCEL ID-3, hexane/isopropanol = 80/20, 1 mL/min, λ = 254 nm, *t<sub>R</sub>* (major) = 27.683 min, *t<sub>R</sub>* (minor) = 23.646 min, 94% ee.

**[α]<sub>D</sub><sup>25</sup>:** +54.4 (*c* 0.5, CHCl<sub>3</sub>).



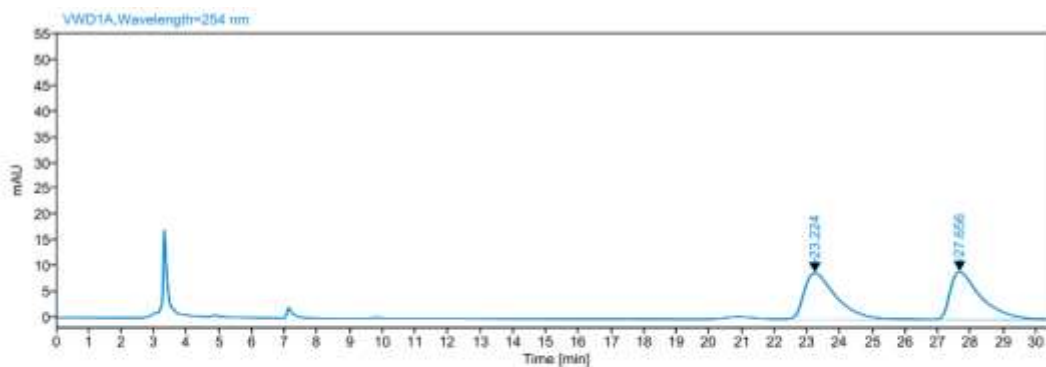

Signal: VWD1A, Wavelength=254 nm

| RT [min] | Type | Width [min] | Area           | Height | Area% | Name |
|----------|------|-------------|----------------|--------|-------|------|
| 23.224   | BB   | 4.47        | 607.47         | 8.99   | 50.14 |      |
| 27.656   | BB   | 4.14        | 604.12         | 9.25   | 49.86 |      |
|          |      | <b>Sum</b>  | <b>1211.58</b> |        |       |      |

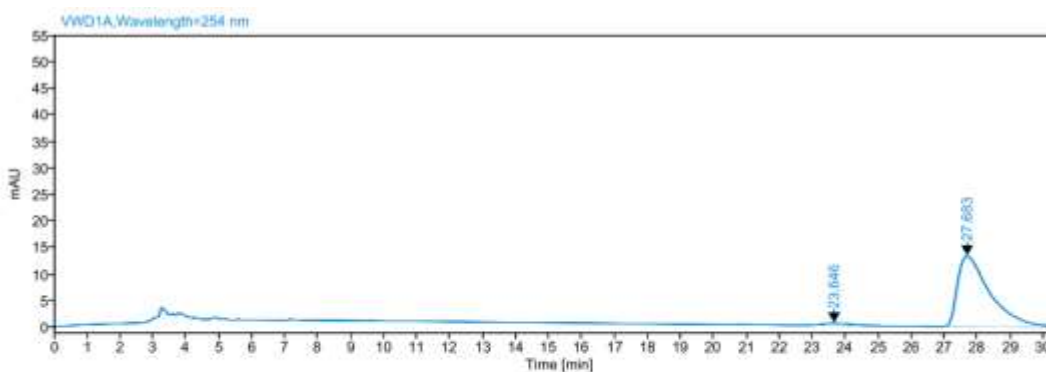

Signal: VWD1A, Wavelength=254 nm

| RT [min] | Type | Width [min] | Area          | Height | Area% | Name |
|----------|------|-------------|---------------|--------|-------|------|
| 23.646   | MM m | 2.74        | 26.76         | 0.43   | 2.85  |      |
| 27.683   | BB   | 4.98        | 912.75        | 13.31  | 97.15 |      |
|          |      | <b>Sum</b>  | <b>939.51</b> |        |       |      |

**(S)-dimethyl(((methylphenylphosphane)boryl)(4-methyl-3-nitrophenyl)methyl)  
phosphonate(3ta)**

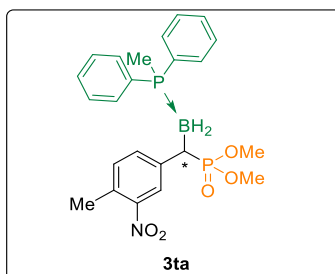

Following the general procedure D, dimethyl (diazo(4-methyl-3-nitrophenyl)methyl)phosphonate (0.20 mmol, 1.0 equiv) and methylphenylphosphane borane (0.40 mmol, 2.0 equiv) were employed and stirred at 20 °C for 12 h to afford **3ta** as a colorless oil in 89% yield (84.3 mg) with 94% ee.

$R_f = 0.22$  (silica gel, EtOAc:PE = 3:1)

$^1\text{H NMR}$  (400 MHz, Chloroform-*d*)  $\delta$  7.52 (t,  $J = 2.4$  Hz, 1H), 7.48 – 7.34 (m, 9H), 7.33 – 7.27 (m, 2H), 6.98 (d,  $J = 7.9$  Hz, 1H), 3.62 (dd,  $J = 10.6, 2.2$  Hz, 6H), 2.59 – 2.37 (m, 4H), 1.58 (d,  $J = 10.0$  Hz, 3H).

$^{13}\text{C NMR}$  (101 MHz, Chloroform-*d*)  $\delta$  148.4 (d,  $J = 2.6$  Hz), 141.3 (dd,  $J = 8.2, 5.7$  Hz), 134.1 (d,  $J = 6.6$  Hz), 132.1 (d,  $J = 2.9$  Hz), 131.7 (t,  $J = 9.5$  Hz), 131.2 (dd,  $J = 23.4, 2.6$  Hz), 129.7 (d,  $J = 2.7$  Hz), 128.8 (dd,  $J = 15.6, 10.0$  Hz), 128.4 (d,  $J = 45.5$  Hz), 127.8 (d,  $J = 45.1$  Hz), 125.0 (d,  $J = 8.8$  Hz), 52.8 (dd,  $J = 39.4, 7.0$  Hz), 19.9, 9.6 (d,  $J = 38.0$  Hz).

$^{11}\text{B NMR}$  (128 MHz, Chloroform-*d*)  $\delta$  -26.09.

$^{31}\text{P NMR}$  (162 MHz, Chloroform-*d*)  $\delta$  37.05 (d,  $J = 76.4$  Hz), 5.07.

**HRMS (ESI):** calc'd for  $(\text{M}+\text{H})^+$   $\text{C}_{23}\text{H}_{29}\text{BNO}_5\text{P}_2^+$  472.1609, found 472.1628.

**HPLC analysis:** DAICEL CHIRALCEL IA-3, hexane/isopropanol = 80/20, 1 mL/min,  $\lambda = 254$  nm,

$t_R$  (major) = 15.027 min,  $t_R$  (minor) = 12.719 min, 94% ee.

$[\alpha]_D^{25}$ : +35.0 ( $c$  0.5,  $\text{CHCl}_3$ ).

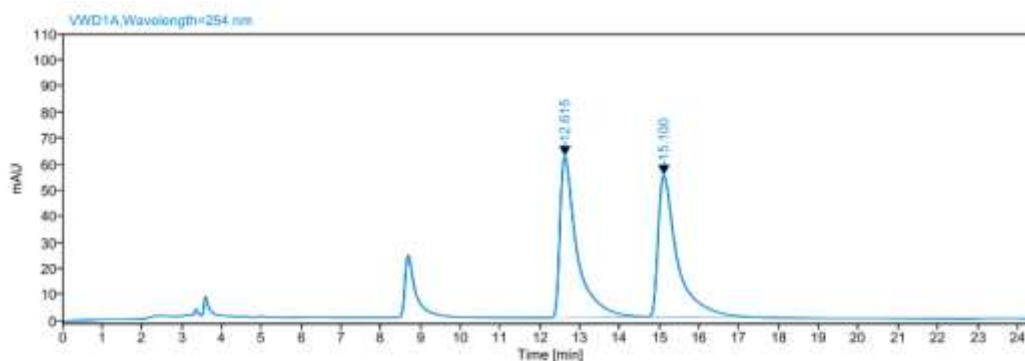

| Signal: VWD1A,Wavelength=254 nm |      |             |         |        |       |      |
|---------------------------------|------|-------------|---------|--------|-------|------|
| RT [min]                        | Type | Width [min] | Area    | Height | Area% | Name |
| 12.615                          | BB   | 2.45        | 1822.42 | 61.81  | 49.94 |      |
| 15.100                          | BB   | 4.27        | 1826.88 | 54.30  | 50.06 |      |
|                                 |      | Sum         | 3649.29 |        |       |      |

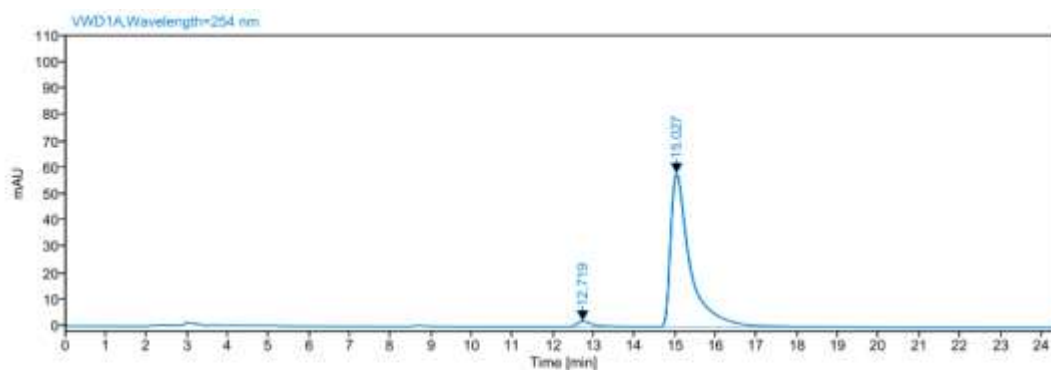

Signal: VWD1A,Wavelength=254 nm

| RT [min] | Type | Width [min] | Area    | Height | Area% | Name |
|----------|------|-------------|---------|--------|-------|------|
| 12.719   | BB   | 1.88        | 62.13   | 2.17   | 3.09  |      |
| 15.027   | BB   | 5.68        | 1951.42 | 58.15  | 96.91 |      |
| Sum      |      |             | 2013.54 |        |       |      |

**(S)-dimethyl(((methylphenylphosphane)boryl)(3,5-dimethoxyphenyl)methyl) phosphonate(3ua)**

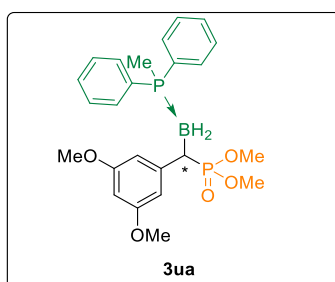

Following the general procedure D, dimethyl (diazo(3,5-dimethoxyphenyl)methyl)phosphonate (0.20 mmol, 1.0 equiv) and methylphenylphosphane borane (0.40 mmol, 2.0 equiv) were employed and stirred at 20 °C for 12 h to afford **3ua** as a colorless oil in 81% yield (76.2 mg) with 93% ee.

$R_f$  = 0.19 (silica gel, EtOAc:PE = 3:1)

$^1\text{H NMR}$  (400 MHz, Chloroform-*d*)  $\delta$  7.52 – 7.36 (m, 8H), 7.35 – 7.27 (m, 2H), 6.29 (t,  $J$  = 2.4 Hz, 2H), 6.13 (q,  $J$  = 2.2 Hz, 1H), 3.67 – 3.56 (m, 12H), 2.48 – 2.32 (m, 1H), 1.40 (d,  $J$  = 10.2 Hz, 3H).

$^{13}\text{C NMR}$  (101 MHz, Chloroform-*d*)  $\delta$  160.2 (d,  $J$  = 2.6 Hz), 143.5 (dd,  $J$  = 7.8, 5.4 Hz), 131.7 (dd,  $J$  = 26.6, 8.9 Hz), 131.1 (dd,  $J$  = 26.0, 2.6 Hz), 129.6 (d,  $J$  = 58.1 Hz), 128.7 (dd,  $J$  = 26.5, 9.9 Hz), 127.8 (d,  $J$  = 55.7 Hz), 107.3 (d,  $J$  = 8.1 Hz), 97.7 (d,  $J$  = 3.2 Hz), 55.0, 52.8 (dd,  $J$  = 42.3, 7.0 Hz), 9.2 (d,  $J$  = 37.1 Hz).

$^{11}\text{B NMR}$  (128 MHz, Chloroform-*d*)  $\delta$  -26.05.

$^{31}\text{P NMR}$  (162 MHz, Chloroform-*d*)  $\delta$  38.51 (d,  $J$  = 84.5 Hz), 5.41.

**HRMS (ESI):** calc'd for (M+H)<sup>+</sup> C<sub>24</sub>H<sub>32</sub>BO<sub>5</sub>P<sub>2</sub><sup>+</sup> 473.1813, found 473.1825.

**HPLC analysis:** DAICEL CHIRALCEL AD-H, hexane/isopropanol = 70/30, 1 mL/min,  $\lambda = 254$  nm,  $t_R$  (major) = 23.206 min,  $t_R$  (minor) = 12.841 min, 93% ee.

$[\alpha]_D^{25}$ : +41.6 (*c* 0.5, CHCl<sub>3</sub>).

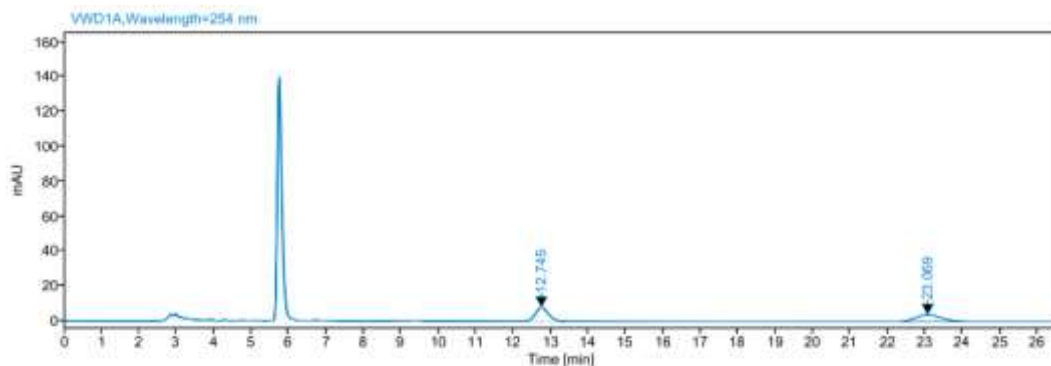

Signal: VWD1A, Wavelength=254 nm

| RT [min] | Type | Width [min] | Area   | Height | Area% | Name |
|----------|------|-------------|--------|--------|-------|------|
| 12.745   | BB   | 1.67        | 194.00 | 7.94   | 50.09 |      |
| 23.069   | BB   | 2.62        | 193.28 | 3.96   | 49.91 |      |
| Sum      |      |             | 387.27 |        |       |      |

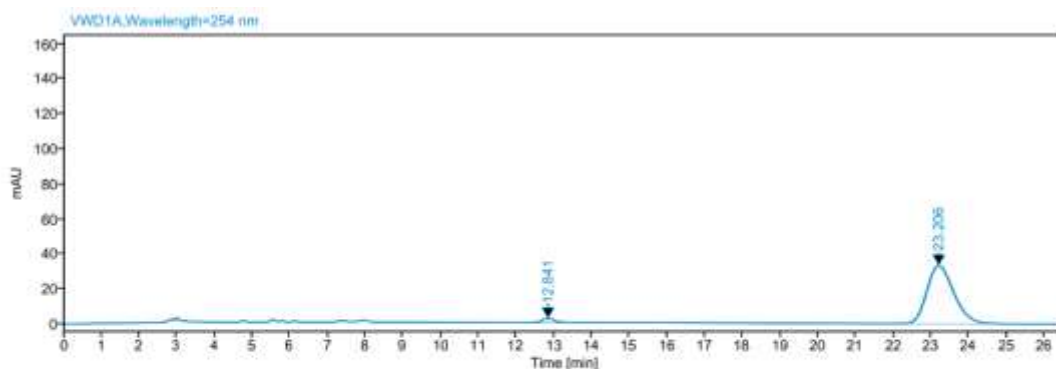

Signal: VWD1A, Wavelength=254 nm

| RT [min] | Type | Width [min] | Area    | Height | Area% | Name |
|----------|------|-------------|---------|--------|-------|------|
| 12.841   | BB   | 1.56        | 58.48   | 2.39   | 3.43  |      |
| 23.206   | BB   | 3.31        | 1648.91 | 33.22  | 96.57 |      |
| Sum      |      |             | 1707.40 |        |       |      |

**(S)-dimethyl(((methylphenylphosphane)boryl)(9H-fluoren-2-yl)methyl)phosphonate(3va)**

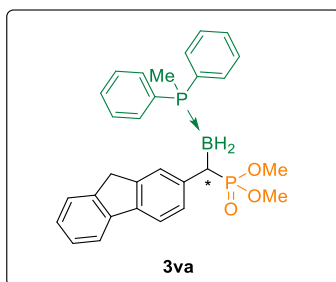

Following the general procedure D, dimethyl (diazo(9H-fluoren-2-yl)methyl)phosphonate (0.20 mmol, 1.0 equiv) and methylphenylphosphane borane (0.40 mmol, 2.0 equiv) were employed and stirred

at 20 °C for 12 h to afford **3va** as a yellow oil in 95% yield (95.2 mg) with 94% ee.

$R_f$  = 0.27 (silica gel, EtOAc:PE = 3:1)

$^1\text{H NMR}$  (400 MHz, Chloroform-*d*)  $\delta$  7.69 (d,  $J$  = 7.5 Hz, 1H), 7.58 – 7.38 (m, 9H), 7.37 – 7.21 (m, 6H), 7.10 (d,  $J$  = 7.9 Hz, 1H), 3.75 – 3.56 (m, 8H), 2.66 – 2.48 (m, 1H), 1.32 (d,  $J$  = 10.2 Hz, 3H).

$^{13}\text{C NMR}$  (101 MHz, Chloroform-*d*)  $\delta$  143.1, 143.0, 141.8, 139.9 (dd,  $J$  = 8.5, 5.7 Hz), 138.8 (d,  $J$  = 3.6 Hz), 131.7 (dd,  $J$  = 27.7, 8.9 Hz), 131.0 (dd,  $J$  = 32.3, 2.5 Hz), 129.5 (d,  $J$  = 57.9 Hz), 128.7 (dd,  $J$  = 27.0, 10.0 Hz), 127.9 (d,  $J$  = 8.3 Hz), 127.8 (d,  $J$  = 55.6 Hz), 126.5, 126.1, 126.0, 124.8, 119.3, 119.3, 52.8 (dd,  $J$  = 47.9, 7.1 Hz), 36.7, 9.4 (d,  $J$  = 37.0 Hz).

$^{11}\text{B NMR}$  (128 MHz, Chloroform-*d*)  $\delta$  -25.80.

$^{31}\text{P NMR}$  (162 MHz, Chloroform-*d*)  $\delta$  38.94 (d,  $J$  = 85.4 Hz), 5.53.

**HRMS (ESI):** calc'd for (M+H)<sup>+</sup> C<sub>29</sub>H<sub>32</sub>BO<sub>3</sub>P<sub>2</sub><sup>+</sup> 501.1914, found 501.1924.

**HPLC analysis:** DAICEL CHIRALCEL AD-H, hexane/isopropanol = 80/20, 1 mL/min,  $\lambda$  = 254 nm,  $t_R$  (major) = 20.721 min,  $t_R$  (minor) = 15.399 min, 94% ee.

$[\alpha]_D^{25}$ : +107.4 ( $c$  0.5, CHCl<sub>3</sub>).

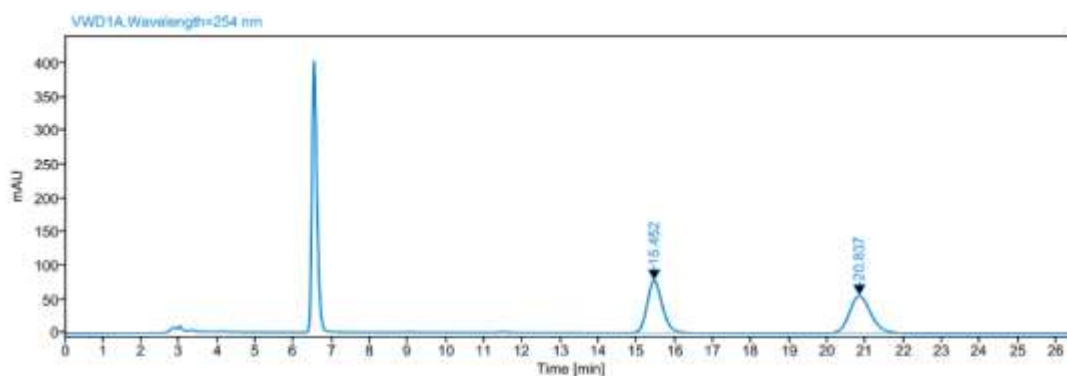

| Signal: VWD1A,Wavelength=254 nm |      |             |         |        |       |      |
|---------------------------------|------|-------------|---------|--------|-------|------|
| RT [min]                        | Type | Width [min] | Area    | Height | Area% | Name |
| 15.452                          | BB   | 2.65        | 2118.42 | 77.10  | 49.95 |      |
| 20.837                          | BB   | 3.01        | 2122.57 | 55.28  | 50.05 |      |
|                                 |      | Sum         | 4240.98 |        |       |      |

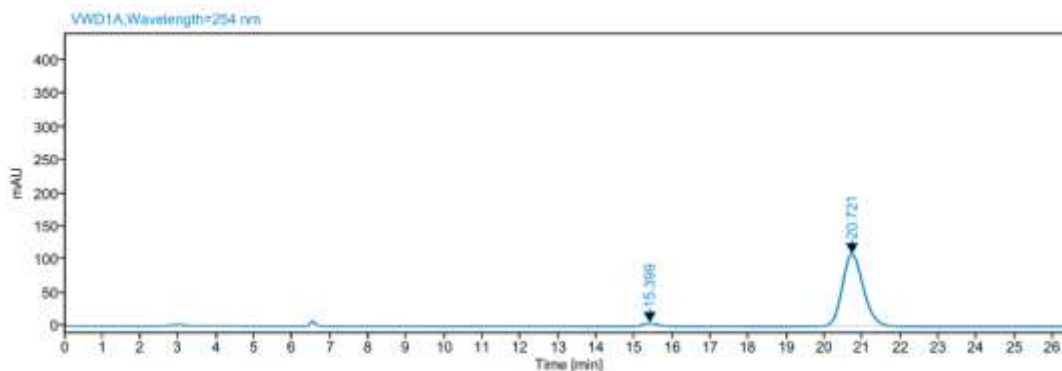

| Signal: VWD1A, Wavelength=254 nm |      |             |                |        |       |      |
|----------------------------------|------|-------------|----------------|--------|-------|------|
| RT [min]                         | Type | Width [min] | Area           | Height | Area% | Name |
| 15.399                           | BB   | 1.46        | 136.83         | 5.01   | 3.14  |      |
| 20.721                           | BB   | 4.41        | 4224.39        | 108.81 | 96.86 |      |
|                                  |      | <b>Sum</b>  | <b>4361.22</b> |        |       |      |

**(S)-dimethyl(((methylphenylphosphane)boryl)(1H-indol-5-yl)methyl)phosphonate(3wa)**

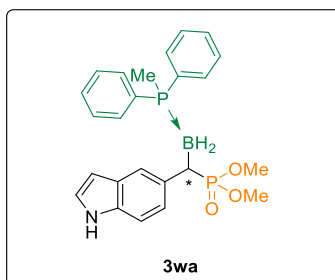

Following the general procedure D, dimethyl (diazo(1H-indol-5-yl)methyl)phosphonate (0.20 mmol, 1.0 equiv) and methylphenylphosphane borane (0.40 mmol, 2.0 equiv) were employed and stirred at 20 °C for 12 h to afford **3wa** as a colorless oil in 85% yield (76.4 mg) with 89% ee.

$R_f$  = 0.13 (silica gel, EtOAc:PE = 3:1)

$^1\text{H NMR}$  (400 MHz, Chloroform-*d*)  $\delta$  8.6 (s, 1H), 7.5 – 7.3 (m, 8H), 7.3 – 7.2 (m, 3H), 7.1 (d,  $J$  = 8.4 Hz, 1H), 7.1 (t,  $J$  = 2.8 Hz, 1H), 7.1 (d,  $J$  = 8.3 Hz, 1H), 6.3 (s, 1H), 3.6 (dd,  $J$  = 28.8, 10.4 Hz, 6H), 2.6 – 2.5 (m, 1H), 1.2 (dd,  $J$  = 10.3, 2.1 Hz, 3H).

$^{13}\text{C NMR}$  (101 MHz, Chloroform-*d*)  $\delta$  134.4, 131.8 (dd,  $J$  = 24.3, 8.8 Hz), 131.0 (dd,  $J$  = 26.4, 2.5 Hz), 130.1 (d,  $J$  = 57.8 Hz), 128.7 (dd,  $J$  = 28.2, 9.9 Hz), 128.1 (d,  $J$  = 54.8 Hz), 127.9 (d,  $J$  = 2.3 Hz), 124.1, 124.0 (d,  $J$  = 7.1 Hz), 120.9 (d,  $J$  = 9.1 Hz), 110.8, 101.9, 52.7 (dd,  $J$  = 47.3, 7.0 Hz), 9.3 (d,  $J$  = 36.5 Hz).

$^{11}\text{B NMR}$  (128 MHz, Chloroform-*d*)  $\delta$  -25.15.

$^{31}\text{P NMR}$  (162 MHz, Chloroform-*d*)  $\delta$  39.97 (d,  $J$  = 88.0 Hz), 5.92.

**HRMS (ESI):** calc'd for (M+H) $^+$  C<sub>24</sub>H<sub>29</sub>BNO<sub>3</sub>P<sub>2</sub> $^+$  452.1710, found 452.1709.

**HPLC analysis:** DAICEL CHIRALCEL AD-H, hexane/isopropanol = 60/40, 1 mL/min,  $\lambda = 254$  nm,  $t_R$

(major) = 11.858 min,  $t_R$  (minor) = 10.448 min, 89% ee.

$[\alpha]_D^{25}$ : +81.2 ( $c$  0.25,  $\text{CHCl}_3$ ).

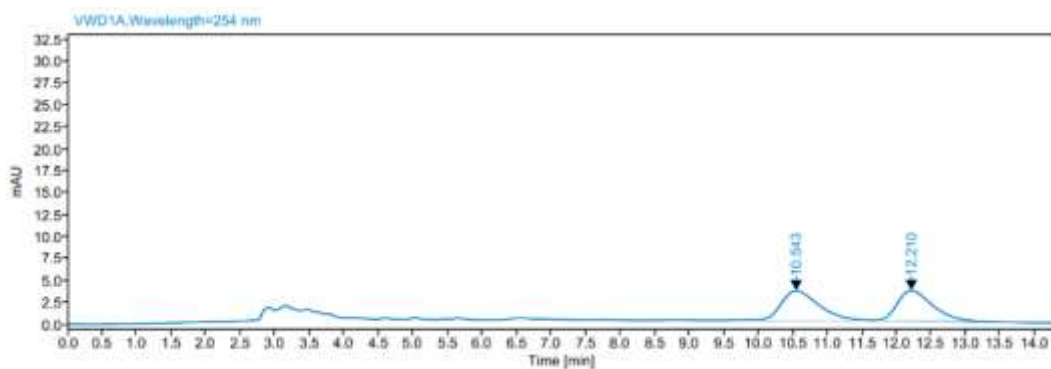

Signal: VWD1A, Wavelength=254 nm

| RT [min] | Type       | Width [min] | Area          | Height | Area% | Name |
|----------|------------|-------------|---------------|--------|-------|------|
| 10.543   | BB         | 2.32        | 127.49        | 3.36   | 50.75 |      |
| 12.210   | BB         | 2.05        | 123.74        | 3.45   | 49.25 |      |
|          | <b>Sum</b> |             | <b>251.24</b> |        |       |      |

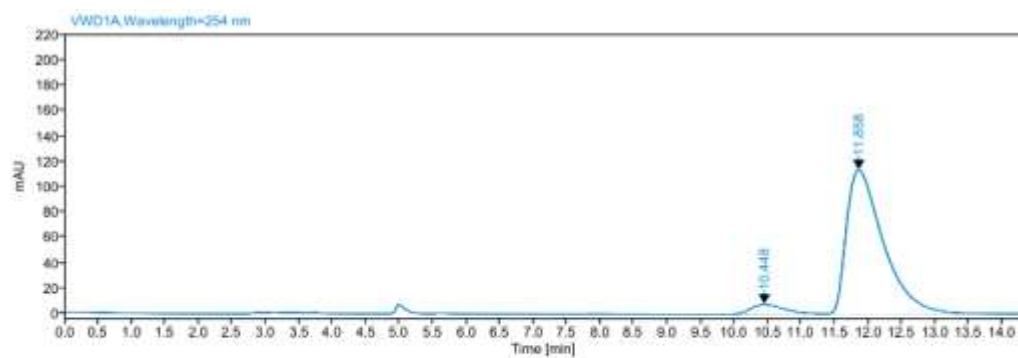

Signal: VWD1A, Wavelength=254 nm

| RT [min] | Type       | Width [min] | Area           | Height | Area% | Name |
|----------|------------|-------------|----------------|--------|-------|------|
| 10.448   | MM m       | 1.30        | 255.85         | 7.52   | 5.53  |      |
| 11.858   | MM m       | 4.28        | 4371.36        | 113.62 | 94.47 |      |
|          | <b>Sum</b> |             | <b>4627.21</b> |        |       |      |

**(S)-dimethyl(((methylphenylphosphane)boryl)(benzo[d][1,3]dioxol-5-yl)methyl)  
phosphonate(3xa)**

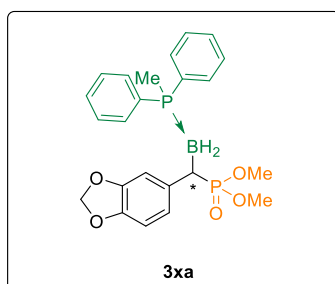

Following the general procedure D, dimethyl (benzo[d][1,3]dioxol-5-yl(diazo)methyl)phosphonate

(0.20 mmol, 1.0 equiv) and methyldiphenylphosphane borane (0.40 mmol, 2.0 equiv) were employed and stirred at 20 °C for 12 h to afford **3xa** as a colorless oil in 77% yield (70.5 mg) with 91% ee.

$R_f$  = 0.23 (silica gel, EtOAc:PE = 3:1)

$^1\text{H NMR}$  (500 MHz, Chloroform-*d*)  $\delta$  7.51 – 7.38 (m, 8H), 7.36 – 7.30 (m, 2H), 6.75 (t,  $J$  = 2.0 Hz, 1H), 6.51 (d,  $J$  = 7.9 Hz, 1H), 6.48 – 6.42 (m, 1H), 5.85 – 5.78 (m, 2H), 3.61 (dd,  $J$  = 10.4, 7.4 Hz, 6H), 2.46 – 2.33 (m, 1H), 1.46 (d,  $J$  = 10.2 Hz, 3H).

$^{13}\text{C NMR}$  (126 MHz, Chloroform-*d*)  $\delta$  147.1 (d,  $J$  = 3.0 Hz), 145.0 (d,  $J$  = 3.7 Hz), 135.0 (dd,  $J$  = 9.1, 5.7 Hz), 131.7 (dd,  $J$  = 24.8, 8.9 Hz), 131.1 (dd,  $J$  = 31.9, 2.4 Hz), 129.4 (d,  $J$  = 58.3 Hz), 128.7 (dd,  $J$  = 30.0, 9.9 Hz), 128.0 (d,  $J$  = 55.8 Hz), 121.9 (d,  $J$  = 9.1 Hz), 110.0 (d,  $J$  = 6.6 Hz), 107.6 (d,  $J$  = 2.9 Hz), 100.5, 52.7 (dd,  $J$  = 54.9, 7.1 Hz), 9.3 (d,  $J$  = 37.0 Hz).

$^{31}\text{P NMR}$  (202 MHz, Chloroform-*d*)  $\delta$  39.25 (d,  $J$  = 84.1 Hz), 6.19.

$^{11}\text{B NMR}$  (160 MHz, Chloroform-*d*)  $\delta$  -26.79.

**HRMS (ESI):** calc'd for (M+H)<sup>+</sup> C<sub>23</sub>H<sub>28</sub>BO<sub>3</sub>P<sub>2</sub><sup>+</sup> 457.1500, found 457.1500.

**HPLC analysis:** DAICEL CHIRALCEL IA-3, hexane/isopropanol = 80/20, 1 mL/min,  $\lambda$  = 254 nm,

$t_R$  (major) = 30.272 min,  $t_R$  (minor) = 19.796 min, 91% ee.

$[\alpha]^{25}_D$ : +70.2 (c 0.5, CHCl<sub>3</sub>).

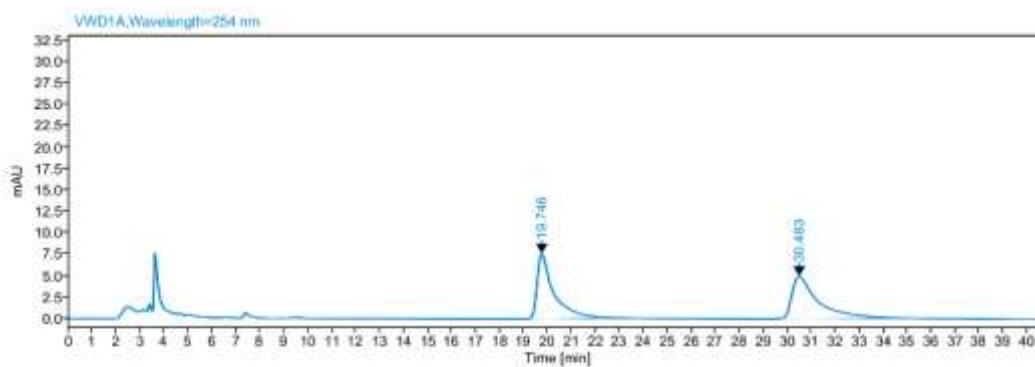

| Signal: VWD1A,Wavelength=254 nm |      |             |        |        |       |      |
|---------------------------------|------|-------------|--------|--------|-------|------|
| RT [min]                        | Type | Width [min] | Area   | Height | Area% | Name |
| 19.746                          | BB   | 3.91        | 367.69 | 7.56   | 49.25 |      |
| 30.483                          | BB   | 5.30        | 378.84 | 4.92   | 50.75 |      |
|                                 |      | Sum         | 746.53 |        |       |      |



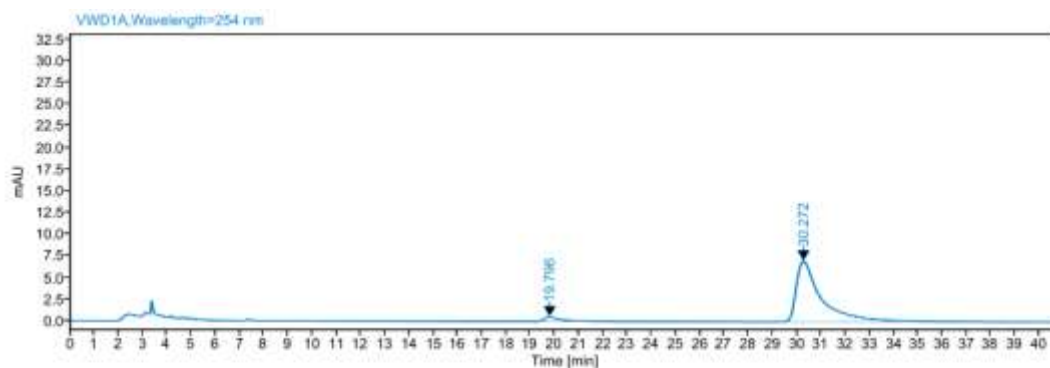

Signal: VWD1A,Wavelength=254 nm

| RT [min] | Type | Width [min] | Area   | Height | Area% | Name |
|----------|------|-------------|--------|--------|-------|------|
| 19.796   | MM m | 3.79        | 23.48  | 0.52   | 4.45  |      |
| 30.272   | BM m | 7.82        | 504.53 | 7.00   | 95.55 |      |
| Sum      |      |             | 528.01 |        |       |      |

**(S)-dimethyl(((methylphenylphosphane)boryl)(dibenzo[b,d]furan-1-yl)methyl)phosphonate(3ya)**

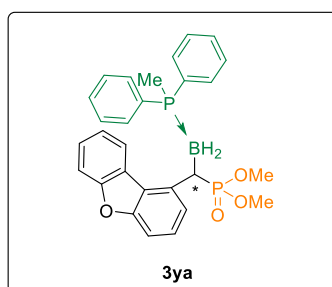

In air, a 25 mL schlenk tube was charged with  $\text{Cu}(\text{MeCN})_4\text{PF}_6$  (10 mol%), **L1** (12 mol%). The tube was evacuated and filled with argon for three cycles. Then, 2 mL of CPME, dimethyl (diazo(dibenzo[b,d]furan-1-yl)phosphonate (0.20 mmol, 1.0 equiv) and methylphenylphosphane borane (0.40 mmol, 2.0 equiv) were employed and stirred at 20 °C for 12 h to afford **3ya** as a colorless oil in 77% yield (77.4 mg) with 85% ee.

$R_f = 0.52$  (silica gel, EtOAc:PE = 3:1)

$^1\text{H NMR}$  (400 MHz, Chloroform-*d*)  $\delta$  7.67 (dd,  $J = 7.0, 2.7$  Hz, 1H), 7.53 (d,  $J = 7.8$  Hz, 1H), 7.47 (d,  $J = 8.2$  Hz, 1H), 7.43 – 7.21 (m, 11H), 7.21 – 7.14 (m, 2H), 7.01 (t,  $J = 7.6$  Hz, 1H), 3.59 (d,  $J = 10.5$  Hz, 6H), 3.50 – 3.34 (m, 1H), 1.35 (d,  $J = 10.3$  Hz, 3H).

$^{13}\text{C NMR}$  (101 MHz, Chloroform-*d*)  $\delta$  155.8 (d,  $J = 2.0$  Hz), 155.7, 137.9 (dd,  $J = 8.5, 6.1$  Hz), 131.7 (dd,  $J = 8.9, 5.0$  Hz), 131.0 (dd,  $J = 4.8, 2.5$  Hz), 129.2 (d,  $J = 58.5$  Hz), 128.7 (dd,  $J = 12.1, 10.0$  Hz), 127.9 (d,  $J = 56.2$  Hz), 126.8 (d,  $J = 3.8$  Hz), 125.9, 124.7 (d,  $J = 5.4$  Hz), 124.4, 122.2 (d,  $J = 6.3$  Hz), 122.0 (d,  $J = 9.6$  Hz), 111.1, 107.9 (d,  $J = 3.7$  Hz), 52.8 (dd,  $J = 56.7, 7.0$  Hz), 9.6 (d,  $J = 37.0$  Hz).

<sup>11</sup>B NMR (128 MHz, Chloroform-*d*) δ -25.76.

<sup>31</sup>P NMR (162 MHz, Chloroform-*d*) δ 38.08, 5.22.

HRMS (ESI): calc'd for (M+H)<sup>+</sup> C<sub>28</sub>H<sub>30</sub>BO<sub>4</sub>P<sub>2</sub>+ 503.1707, found 503.1707.

HPLC analysis: DAICEL CHIRALCEL ID-3, hexane/isopropanol = 80/20, 1 mL/min, λ = 254 nm,

t<sub>R</sub> (major) = 36.510 min, t<sub>R</sub> (minor) = 29.812 min, 85% ee.

[α]<sup>25</sup><sub>D</sub>: -46.8 (c 0.5, CHCl<sub>3</sub>).

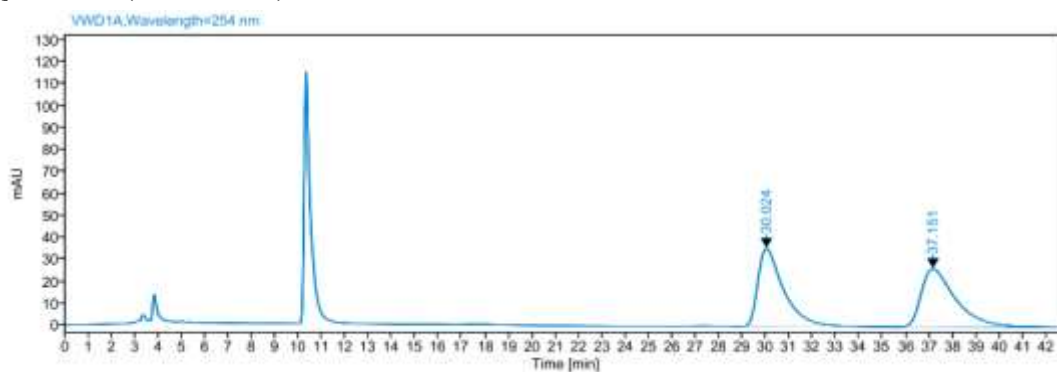

Signal: VWD1A, Wavelength=254 nm

| RT [min] | Type | Width [min] | Area           | Height | Area% | Name |
|----------|------|-------------|----------------|--------|-------|------|
| 30.024   | BB   | 6.49        | 2721.55        | 35.42  | 49.96 |      |
| 37.151   | BB   | 8.31        | 2726.32        | 26.37  | 50.04 |      |
|          |      | <b>Sum</b>  | <b>5447.87</b> |        |       |      |

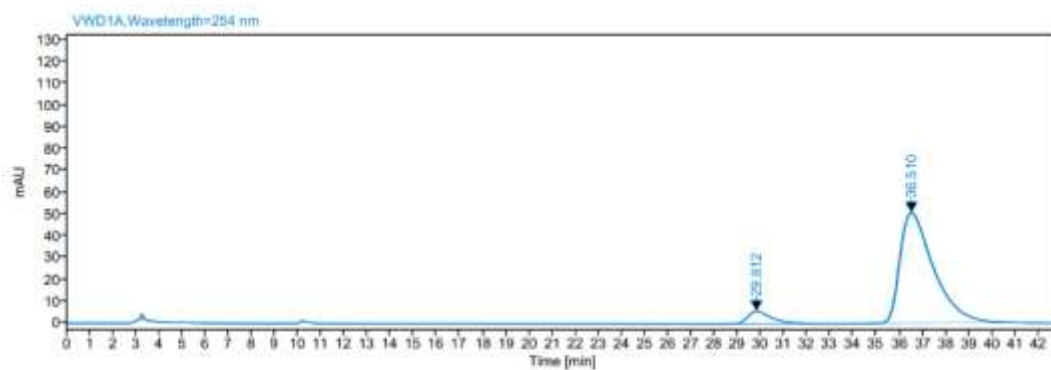

Signal: VWD1A, Wavelength=254 nm

| RT [min] | Type | Width [min] | Area           | Height | Area% | Name |
|----------|------|-------------|----------------|--------|-------|------|
| 29.812   | BB   | 4.02        | 406.63         | 5.71   | 7.32  |      |
| 36.510   | BB   | 7.33        | 5149.35        | 50.72  | 92.68 |      |
|          |      | <b>Sum</b>  | <b>5555.98</b> |        |       |      |

**(S)-dimethyl(((methylphenylphosphane)boryl)(dibenzo[b,d]thiophen-4-yl)methyl)phosphonate(3za)**

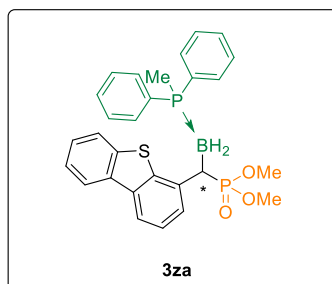

Following the general procedure D, dimethyl (diazo(dibenzo[b,d]thiophen-4-yl)methyl)phosphonate (0.20 mmol, 1.0 equiv) and methylphenylphosphane borane (0.40 mmol, 2.0 equiv) were employed and stirred at 20 °C for 36 h to afford **3za** as a colorless oil in 79% yield (82.2 mg) with 98% ee.

$R_f$  = 0.13 (silica gel, EtOAc:PE = 3:1)

**$^1\text{H}$  NMR (500 MHz, Chloroform-*d*)**  $\delta$  8.06 – 8.02 (m, 1H), 7.79 (dd,  $J$  = 7.8, 1.2 Hz, 1H), 7.76 – 7.70 (m, 2H), 7.47 – 7.39 (m, 5H), 7.34 – 7.25 (m, 6H), 7.20 – 7.14 (m, 2H), 3.60 (dd,  $J$  = 28.8, 10.5 Hz, 6H), 2.85 – 2.71 (m, 1H), 1.47 (d,  $J$  = 10.2 Hz, 3H).

**$^{13}\text{C}$  NMR (126 MHz, Chloroform-*d*)**  $\delta$  139.4 (d,  $J$  = 10.1 Hz), 138.8, 136.6, 136.1 (dd,  $J$  = 8.9, 5.0 Hz), 134.9, 131.6 (dd,  $J$  = 57.7, 8.9 Hz), 131.0 (dd,  $J$  = 45.2, 2.5 Hz), 128.8 (d,  $J$  = 9.9 Hz), 128.5 (dd,  $J$  = 64.0, 57.3 Hz), 128.4 (d,  $J$  = 10.0 Hz), 127.8, 126.2, 124.8, 124.1, 122.5, 121.4, 118.3 (d,  $J$  = 3.6 Hz), 52.8 (dd,  $J$  = 51.3, 6.9 Hz), 9.2 (d,  $J$  = 37.0 Hz).

**$^{11}\text{B}$  NMR (160 MHz, Chloroform-*d*)**  $\delta$  -26.64.

**$^{31}\text{P}$  NMR (202 MHz, Chloroform-*d*)**  $\delta$  38.12 (d,  $J$  = 80.1 Hz), 5.28.

**HRMS (ESI):** calc'd for (M+H)<sup>+</sup> C<sub>28</sub>H<sub>30</sub>BO<sub>3</sub>P<sub>2</sub>S<sup>+</sup> 519.1478, found 519.1493.

**HPLC analysis:** DAICEL CHIRALCEL IA-3, hexane/isopropanol = 80/20, 1 mL/min,  $\lambda$  = 254 nm,  $t_R$  (major) = 13.777 min,  $t_R$  (minor) = 12.097 min, 98% ee.

**$[\alpha]_D^{25}$ :** -10.0 (*c* 0.5, CHCl<sub>3</sub>).

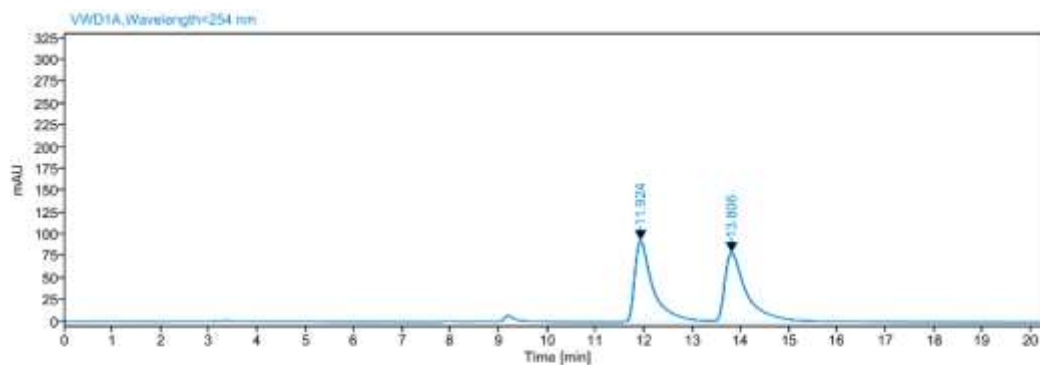

Signal: VWD1A, Wavelength=254 nm

| RT [min] | Type | Width [min] | Area    | Height | Area% | Name |
|----------|------|-------------|---------|--------|-------|------|
| 11.924   | BV   | 1.96        | 2492.34 | 93.12  | 49.01 |      |
| 13.806   | VB   | 5.76        | 2592.79 | 79.44  | 50.99 |      |
| Sum      |      |             | 5085.13 |        |       |      |

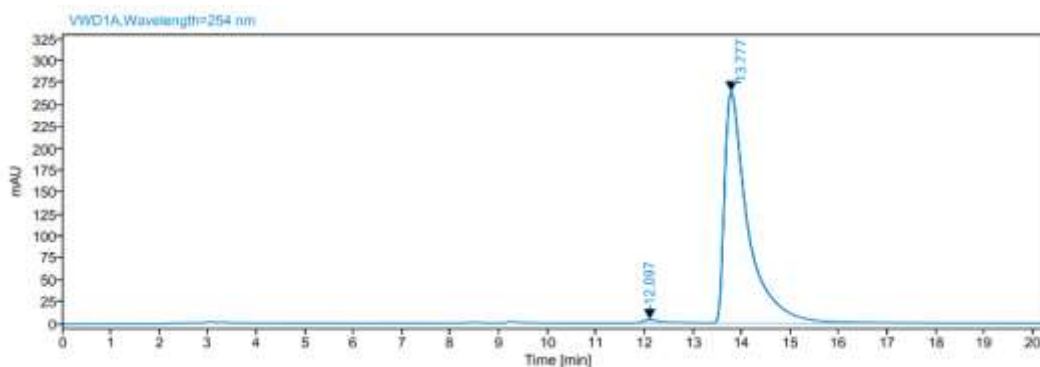

Signal: VWD1A, Wavelength=254 nm

| RT [min] | Type | Width [min] | Area    | Height | Area% | Name |
|----------|------|-------------|---------|--------|-------|------|
| 12.097   | BB   | 1.06        | 86.76   | 3.79   | 0.97  |      |
| 13.777   | BBA  | 7.83        | 8864.01 | 263.58 | 99.03 |      |
| Sum      |      |             | 8950.77 |        |       |      |

**(S)-dimethyl(((methylphenylphosphane)boryl)(dibenzo[b,d]thiophen-4-yl)methyl) phosphonate(3Aa)**

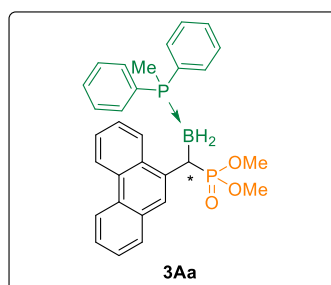

Following the general procedure D, dimethyl (diazo(phenanthren-9-yl)methyl)phosphonate (0.20 mmol, 1.0 equiv) and methylphenylphosphane borane (0.40 mmol, 2.0 equiv) were employed and stirred at 20 °C for 12 h to afford **3Aa** as a colorless oil in 92% yield (94.2 mg) with 93% ee.

$R_f$  = 0.48 (silica gel, EtOAc:PE = 3:1)

**<sup>1</sup>H NMR (400 MHz, Chloroform-*d*)** δ 8.63 (d, *J* = 8.3 Hz, 1H), 8.53 (d, *J* = 7.8 Hz, 1H), 8.11 (d, *J* = 4.4 Hz, 1H), 7.77 (t, *J* = 6.7 Hz, 2H), 7.58 – 7.43 (m, 3H), 7.42 – 7.32 (m, 2H), 7.31 – 7.18 (m, 7H), 7.15 – 7.07 (m, 2H), 3.65 – 3.37 (m, 7H), 1.32 (d, *J* = 10.2 Hz, 3H).

**<sup>13</sup>C NMR (101 MHz, Chloroform-*d*)** δ 134.9 (dd, *J* = 8.3, 5.6 Hz), 131.7, 131.5 (dd, *J* = 28.4, 8.9 Hz), 131.2, 131.1, 130.8 (dd, *J* = 27.9, 2.5 Hz), 130.5, 129.3, 128.8, 128.5 (dd, *J* = 29.0, 10.1 Hz), 128.4, 128.3, 128.0 (d, *J* = 52.1 Hz), 126.2, 126.0, 125.5, 123.8, 122.9, 122.0 (d, *J* = 1.6 Hz), 52.9 (dd, *J* = 47.6, 7.1 Hz), 9.6 (d, *J* = 37.0 Hz).

**<sup>11</sup>B NMR (128 MHz, Chloroform-*d*)** δ -25.37.

**<sup>31</sup>P NMR (162 MHz, Chloroform-*d*)** δ 39.06 (d, *J* = 79.3 Hz), 4.90.

**HRMS (ESI):** calc'd for (M+H)<sup>+</sup> C<sub>30</sub>H<sub>32</sub>BO<sub>3</sub>P<sub>2</sub><sup>+</sup> 513.1914, found 513.1914.

**HPLC analysis:** DAICEL CHIRALCEL IA-3, hexane/isopropanol = 80/20, 1 mL/min, λ = 254 nm,

t<sub>R</sub> (major) = 26.488 min, t<sub>R</sub> (minor) = 17.401 min, 93% ee.

[α]<sub>D</sub><sup>25</sup>: +48.2 (c 0.5, CHCl<sub>3</sub>).

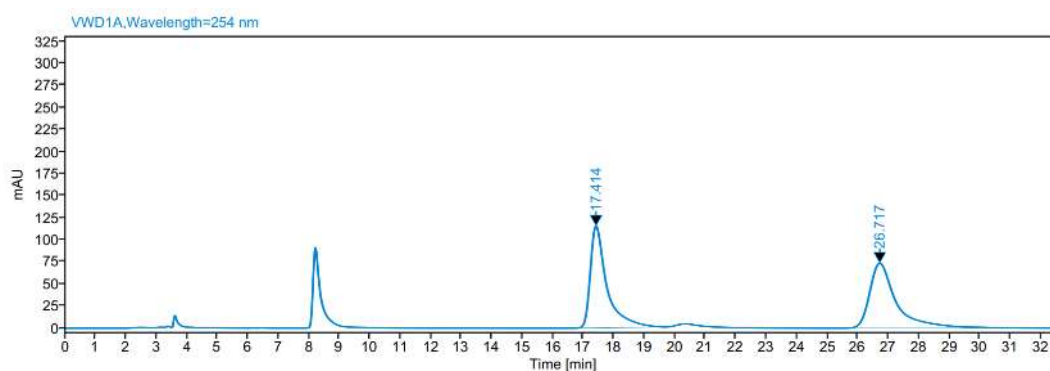

Signal: VWD1A, Wavelength=254 nm

| RT [min] | Type | Width [min] | Area           | Height | Area% | Name |
|----------|------|-------------|----------------|--------|-------|------|
| 17.414   | BB   | 2.98        | 4329.78        | 115.22 | 49.01 |      |
| 26.717   | BB   | 8.15        | 4505.25        | 73.54  | 50.99 |      |
|          |      | <b>Sum</b>  | <b>8835.03</b> |        |       |      |

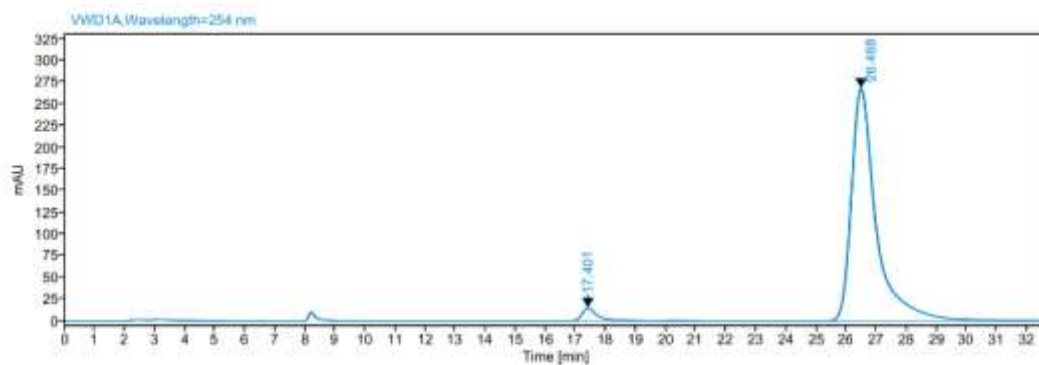

| Signal: VWD1A,Wavelength=254 nm |      |             |          |        |       |      |
|---------------------------------|------|-------------|----------|--------|-------|------|
| RT [min]                        | Type | Width [min] | Area     | Height | Area% | Name |
| 17.401                          | BB   | 2.99        | 542.30   | 14.65  | 3.40  |      |
| 26.488                          | BB   | 9.38        | 15405.00 | 267.61 | 96.60 |      |
| Sum                             |      |             | 15947.30 |        |       |      |

**(S)-dimethyl(((methylphenylphosphane)boryl)(naphthalen-2-yl)methyl)phosphonate(3Ba)**

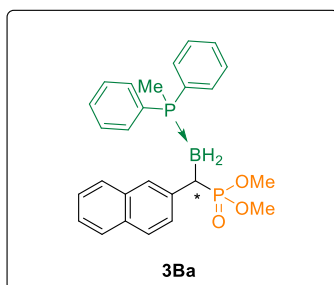

Following the general procedure D, dimethyl(diazo(naphthalen-2-yl)methyl)phosphonate (0.20 mmol, 1.0 equiv) and methylphenylphosphane borane (0.40 mmol, 2.0 equiv) were employed and stirred at 20 °C for 36 h to afford **3Ba** as a colorless oil in 72% yield (66.7 mg) with 94% ee.

$R_f$  = 0.42 (silica gel, EtOAc:PE = 3:1)

$^1\text{H}$  NMR (400 MHz, Chloroform-*d*)  $\delta$  7.70 (d,  $J$  = 9.0 Hz, 1H), 7.64 – 7.55 (m, 2H), 7.50 – 7.29 (m, 12H), 7.28 – 7.20 (m, 2H), 3.62 (dd,  $J$  = 19.1, 10.5 Hz, 6H), 2.75 – 2.57 (m, 1H), 1.27 (d,  $J$  = 10.2 Hz, 3H).

$^{13}\text{C}$  NMR (101 MHz, Chloroform-*d*)  $\delta$  139.0 (dd,  $J$  = 8.7, 5.4 Hz), 133.3 (d,  $J$  = 2.6 Hz), 131.7 (dd,  $J$  = 26.5, 8.9 Hz), 131.6 (d,  $J$  = 2.4 Hz), 131.0 (dd,  $J$  = 29.0, 2.5 Hz), 129.3 (d,  $J$  = 57.5 Hz), 128.7 (dd,  $J$  = 27.5, 10.0 Hz), 128.4 (d,  $J$  = 5.8 Hz), 127.7 (d,  $J$  = 55.5 Hz), 127.4 – 127.2 (m, 3C), 127.1 (d,  $J$  = 10.4 Hz), 125.4, 124.6, 52.7 (dd,  $J$  = 50.3, 7.0 Hz), 9.4 (d,  $J$  = 37.1 Hz).

$^{11}\text{B}$  NMR (128 MHz, Chloroform-*d*)  $\delta$  -25.99.

$^{31}\text{P}$  NMR (162 MHz, Chloroform-*d*)  $\delta$  38.55 (d,  $J$  = 83.2 Hz), 5.51.

**HRMS (ESI):** calc'd for (M+H)<sup>+</sup> C<sub>26</sub>H<sub>30</sub>BO<sub>3</sub>P<sub>2</sub><sup>+</sup> 463.1758, found 463.1770.

**HPLC analysis:** DAICEL CHIRALCEL IA-3, hexane/isopropanol = 80/20, 1 mL/min, λ = 254 nm,

t<sub>R</sub> (major) = 16.978 min, t<sub>R</sub> (minor) = 13.350 min, 94% ee.

[α]<sub>D</sub><sup>25</sup>: +80.8 (c 0.5, CHCl<sub>3</sub>).

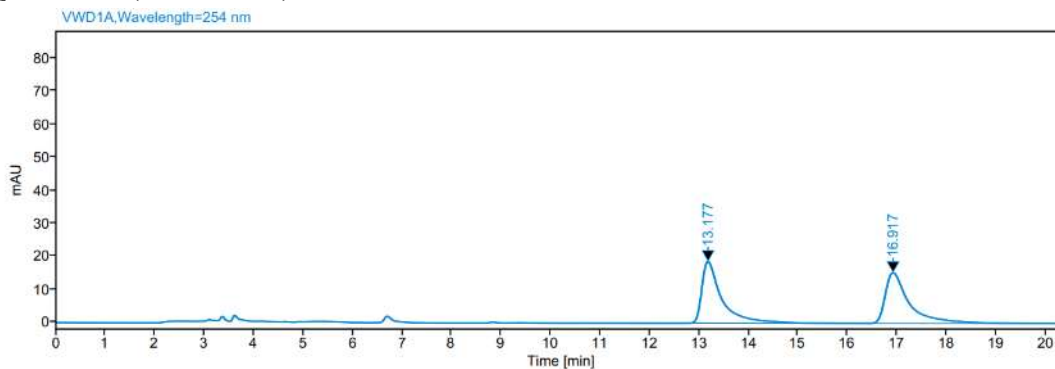

Signal: VWD1A,Wavelength=254 nm

| RT [min] | Type | Width [min] | Area    | Height | Area% | Name |
|----------|------|-------------|---------|--------|-------|------|
| 13.177   | BB   | 3.67        | 528.25  | 18.72  | 50.27 |      |
| 16.917   | BB   | 3.99        | 522.54  | 15.39  | 49.73 |      |
| Sum      |      |             | 1050.78 |        |       |      |

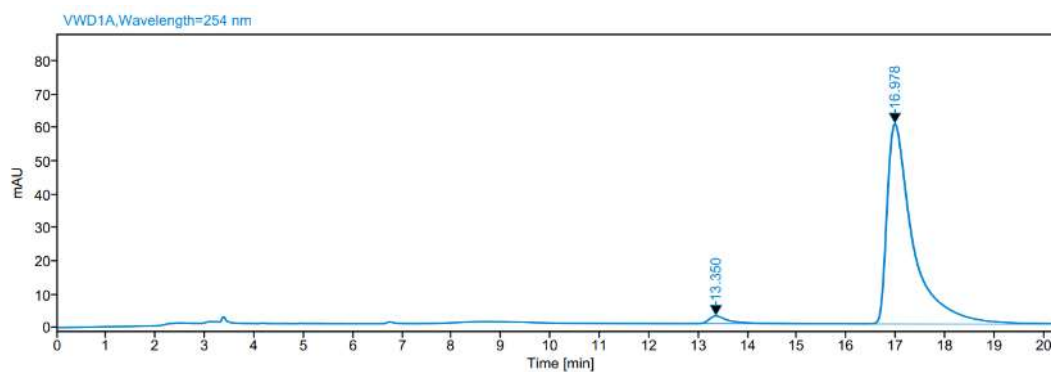

Signal: VWD1A,Wavelength=254 nm

| RT [min] | Type | Width [min] | Area    | Height | Area% | Name |
|----------|------|-------------|---------|--------|-------|------|
| 13.350   | BB   | 2.66        | 67.16   | 2.28   | 2.96  |      |
| 16.978   | BB   | 5.61        | 2200.44 | 60.00  | 97.04 |      |
| Sum      |      |             | 2267.60 |        |       |      |

**(S)-dimethyl(((methylphenylphosphane)boryl)(naphthalen-1-yl)methyl)phosphonate(3Ca)**

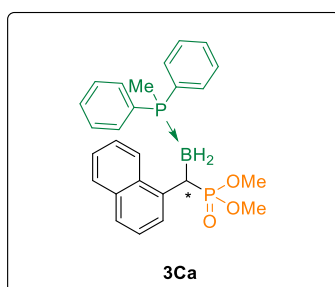

Following the general procedure D, dimethyl (diazo(naphthalen-1-yl)methyl)phosphonate (0.20 mmol, 1.0 equiv) and methyldiphenylphosphane borane (0.40 mmol, 2.0 equiv) were employed and stirred at 20 °C for 12 h to afford **3Ca** as a colorless oil in 97% yield (89.8 mg) with 94% ee.

$R_f$  = 0.3 (silica gel, EtOAc:PE = 3:1)

$^1\text{H NMR}$  (400 MHz, Chloroform-*d*)  $\delta$  7.94 (dd,  $J$  = 7.3, 3.7 Hz, 1H), 7.74 (d,  $J$  = 8.2 Hz, 1H), 7.56 (t,  $J$  = 8.9 Hz, 2H), 7.48 – 7.42 (m, 1H), 7.41 – 7.24 (m, 11H), 7.19 (t,  $J$  = 7.7 Hz, 1H), 3.56 (dd,  $J$  = 38.8, 10.5 Hz, 6H), 3.45 – 3.31 (m, 1H), 1.20 (d,  $J$  = 10.1 Hz, 3H).

$^{13}\text{C NMR}$  (101 MHz, Chloroform-*d*)  $\delta$  137.3 (dd,  $J$  = 8.0, 5.6 Hz), 133.7 (d,  $J$  = 2.0 Hz), 131.6 (dd,  $J$  = 17.3, 8.9 Hz), 131.0 (dd,  $J$  = 15.8, 2.5 Hz), 129.4 (d,  $J$  = 57.6 Hz), 129.0 – 128.3 (m, 3C), 127.8 (d,  $J$  = 55.5 Hz), 127.7, 127.7, 125.5 (d,  $J$  = 4.2 Hz), 125.4 (d,  $J$  = 4.1 Hz), 125.1, 124.7, 123.1, 52.7 (dd,  $J$  = 51.3, 7.0 Hz), 9.3 (d,  $J$  = 36.7 Hz).

$^{11}\text{B NMR}$  (128 MHz, Chloroform-*d*)  $\delta$  -25.28.

$^{31}\text{P NMR}$  (162 MHz, Chloroform-*d*)  $\delta$  38.94 (d,  $J$  = 80.9 Hz), 5.17.

HRMS (ESI): calc'd for (M+H)<sup>+</sup> C<sub>26</sub>H<sub>30</sub>BO<sub>3</sub>P<sub>2</sub><sup>+</sup> 463.1758, found 463.1770.

HPLC analysis: DAICEL CHIRALCEL IA-3, hexane/isopropanol = 80/20, 1 mL/min,  $\lambda$  = 254 nm,  $t_R$  (major) = 13.785 min,  $t_R$  (minor) = 10.270 min, 94% ee.

$[\alpha]_D^{25}$ : +80.8 (*c* 0.5, CHCl<sub>3</sub>).

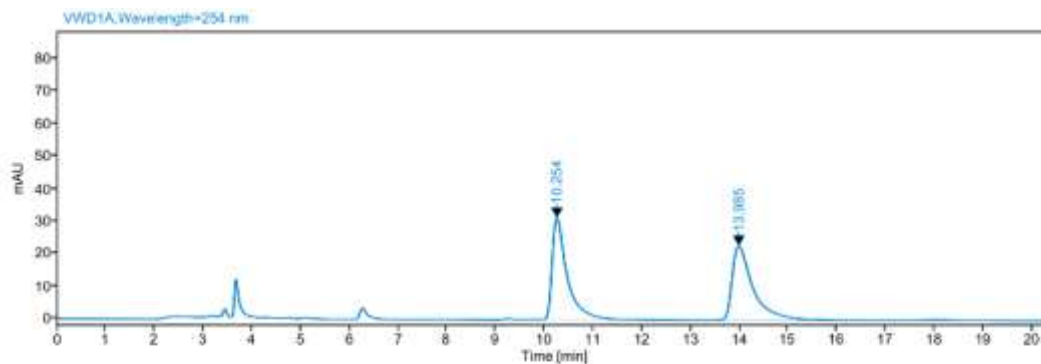

Signal: VWD1A,Wavelength=254 nm

| RT [min] | Type | Width [min] | Area    | Height | Area% | Name |
|----------|------|-------------|---------|--------|-------|------|
| 10.254   | BB   | 3.24        | 677.99  | 31.21  | 49.65 |      |
| 13.985   | BB   | 3.72        | 687.48  | 22.75  | 50.35 |      |
|          |      | Sum         | 1365.47 |        |       |      |



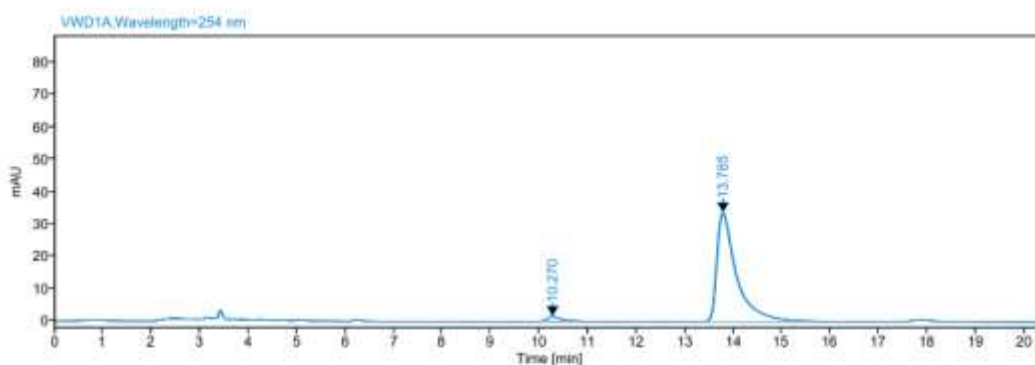

Signal: VWD1A,Wavelength=254 nm

| RT [min] | Type       | Width [min] | Area          | Height | Area% | Name |
|----------|------------|-------------|---------------|--------|-------|------|
| 10.270   | MM m       | 1.61        | 29.92         | 1.49   | 3.05  |      |
| 13.785   | BB         | 3.60        | 950.08        | 33.57  | 96.95 |      |
|          | <b>Sum</b> |             | <b>980.01</b> |        |       |      |

**(S)-dimethyl(((ethyldiphenylphosphane)boryl)(phenyl)methyl)phosphonate(3ab)**

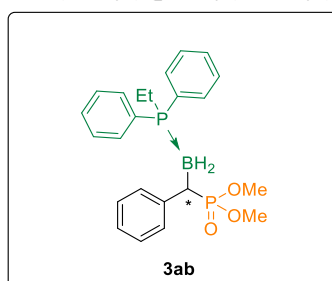

Following the general procedure D, dimethyl(diazo(phenyl)ethyl)phosphonate (0.20 mmol, 1.0 equiv) and ethyldiphenylphosphane borane (0.40 mmol, 2.0 equiv) were employed and stirred at 20 °C for 12 h to afford **3ab** as a colorless oil in 77% yield (65.5 mg) with 91% ee.

$R_f$  = 0.48 (silica gel, EtOAc:PE = 3:1)

$^1\text{H NMR}$  (400 MHz, Chloroform-*d*)  $\delta$  7.51 – 7.37 (m, 8H), 7.36 – 7.30 (m, 2H), 7.13 – 6.98 (m, 5H), 3.57 (dd,  $J$  = 21.1, 10.4 Hz, 6H), 2.39 – 2.23 (m, 2H), 1.99 – 1.83 (m, 1H), 1.45 – 1.29 (m, 1H), 0.79 (dt,  $J$  = 17.2, 7.5 Hz, 3H).

$^{13}\text{C NMR}$  (101 MHz, Chloroform-*d*)  $\delta$  141.4 (dd,  $J$  = 8.8, 4.7 Hz), 132.4 (dd,  $J$  = 34.0, 8.2 Hz), 131.0 (d,  $J$  = 2.1 Hz), 129.3 (d,  $J$  = 7.9 Hz), 128.6 (dd,  $J$  = 18.4, 9.6 Hz), 127.8 (d,  $J$  = 2.9 Hz), 127.5 (t,  $J$  = 54.3 Hz), 125.0 (d,  $J$  = 3.5 Hz), 52.6 (dd,  $J$  = 43.5, 7.0 Hz), 16.0 (d,  $J$  = 34.4 Hz), 6.6.

$^{11}\text{B NMR}$  (128 MHz, Chloroform-*d*)  $\delta$  -27.98.

$^{31}\text{P NMR}$  (162 MHz, Chloroform-*d*)  $\delta$  38.90 (d,  $J$  = 84.3 Hz), 14.17.

**HRMS (ESI):** calc'd for (M+H) $^+$  C<sub>23</sub>H<sub>30</sub>BO<sub>3</sub>P<sub>2</sub> $^+$  427.1758, found 427.1778.

**HPLC analysis:** DAICEL CHIRALCEL AS-H, hexane/isopropanol = 80/20, 1 mL/min,  $\lambda$  = 254 nm,  $t_R$  (major) = 20.252 min,  $t_R$  (minor) = 8.056 min, 91% ee.

$[\alpha]_D^{25}$ : +54.8 (*c* 0.5, CHCl<sub>3</sub>).

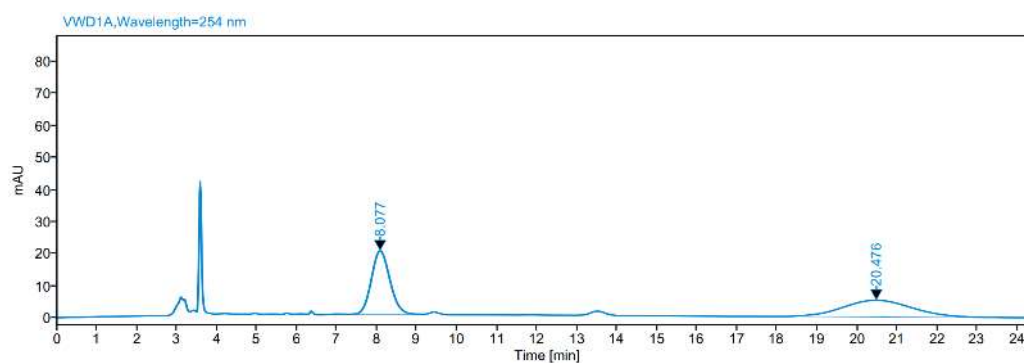

Signal: VWD1A,Wavelength=254 nm

| RT [min] | Type | Width [min] | Area    | Height | Area% | Name |
|----------|------|-------------|---------|--------|-------|------|
| 8.077    | BB   | 1.86        | 636.19  | 19.80  | 50.16 |      |
| 20.476   | BB   | 5.85        | 632.24  | 5.22   | 49.84 |      |
| Sum      |      |             | 1268.43 |        |       |      |

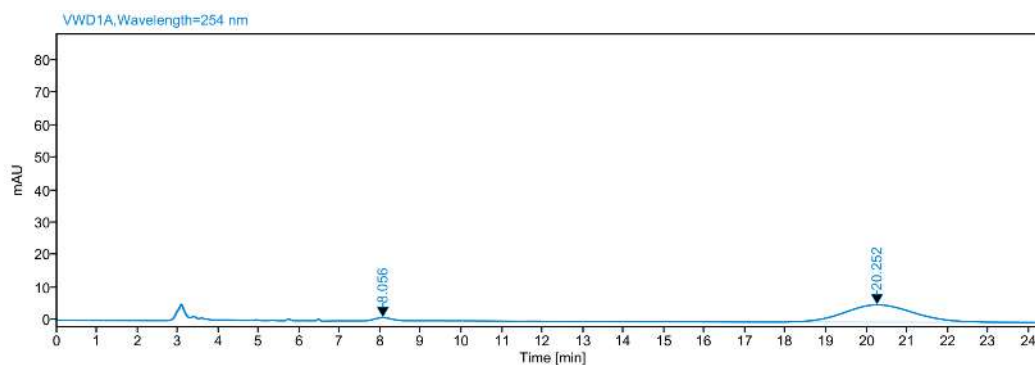

Signal: VWD1A,Wavelength=254 nm

| RT [min] | Type | Width [min] | Area   | Height | Area% | Name |
|----------|------|-------------|--------|--------|-------|------|
| 8.056    | MM m | 1.49        | 29.06  | 0.98   | 4.39  |      |
| 20.252   | MM m | 6.80        | 633.04 | 5.33   | 95.61 |      |
| Sum      |      |             | 662.10 |        |       |      |

**(S)-dimethyl(((isopropyldiphenylphosphane)boryl)(phenyl)methyl)phosphonate(3ac)**

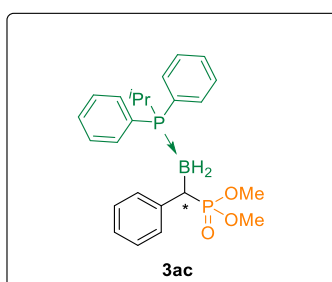

Following the general procedure D, dimethyl(diazo(phenyl)methyl)phosphonate (0.20 mmol, 1.0 equiv) and isopropyldiphenylphosphane borane (0.40 mmol, 2.0 equiv) were employed and stirred at 20 °C for 12 h to afford **3ac** as a colorless oil in 77% yield (68.1 mg) with 80% ee.

$R_f$  = 0.48 (silica gel, EtOAc:PE = 3:1)

**<sup>1</sup>H NMR (400 MHz, Chloroform-*d*)**  $\delta$  7.56 – 7.32 (m, 10H), 7.15 – 7.03 (m, 4H), 7.01 – 6.95 (m, 1H), 3.51 (dd,  $J$  = 21.4, 10.4 Hz, 6H), 2.25 – 2.10 (m, 2H), 0.98 (dd,  $J$  = 14.5, 7.0 Hz, 3H), 0.89 (dd,  $J$  = 15.9, 7.0 Hz, 3H).

**<sup>13</sup>C NMR (101 MHz, Chloroform-*d*)**  $\delta$  139.9 (dd,  $J$  = 8.7, 3.9 Hz), 133.5 (dd,  $J$  = 43.2, 7.8 Hz), 131.0 (dd,  $J$  = 18.0, 2.5 Hz), 129.6 (d,  $J$  = 7.7 Hz), 128.4 (dd,  $J$  = 9.5, 2.8 Hz), 127.7 (d,  $J$  = 2.9 Hz), 125.3 (d,  $J$  = 16.0 Hz), 124.9, 124.8 (d,  $J$  = 10.5 Hz), 52.6 (dd,  $J$  = 44.3, 7.1 Hz), 22.5 (d,  $J$  = 32.2 Hz), 16.8 (d,  $J$  = 2.9 Hz), 16.7.

**<sup>11</sup>B NMR (128 MHz, Chloroform-*d*)**  $\delta$  -26.75.

**<sup>31</sup>P NMR (162 MHz, Chloroform-*d*)**  $\delta$  39.07 (d,  $J$  = 81.2 Hz), 25.28.

**HRMS (ESI):** calc'd for (M+H)<sup>+</sup> C<sub>24</sub>H<sub>32</sub>BO<sub>3</sub>P<sub>2</sub><sup>+</sup> 441.1914, found 441.1934.

**HPLC analysis:** DAICEL CHIRALCEL AS-H, hexane/isopropanol = 85/15, 1 mL/min,  $\lambda$  = 254 nm,

$t_R$  (major) = 24.569min,  $t_R$  (minor) = 9.162 min, 80% ee.

**$[\alpha]_D^{25}$ :** +60.8 ( $c$  0.25, CHCl<sub>3</sub>).

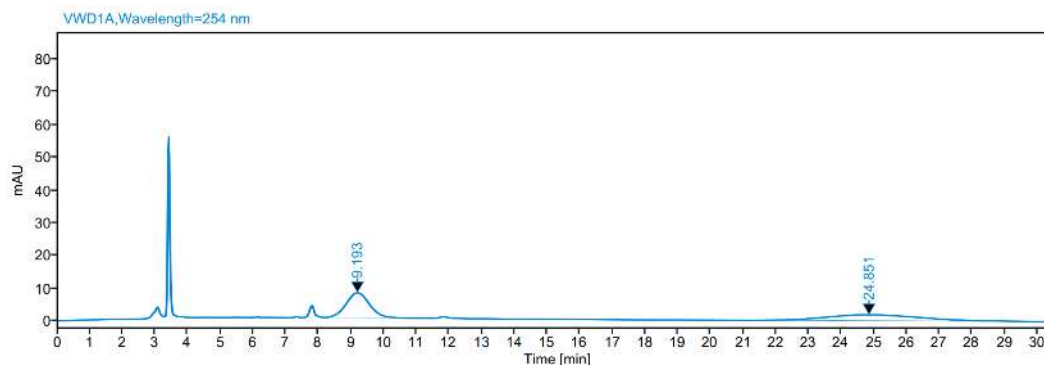

Signal: VWD1A,Wavelength=254 nm

| RT [min]   | Type | Width [min] | Area          | Height | Area% | Name |
|------------|------|-------------|---------------|--------|-------|------|
| 9.193      | MM m | 2.12        | 370.15        | 7.56   | 50.84 |      |
| 24.851     | MM m | 7.91        | 357.98        | 1.80   | 49.16 |      |
| <b>Sum</b> |      |             | <b>728.14</b> |        |       |      |

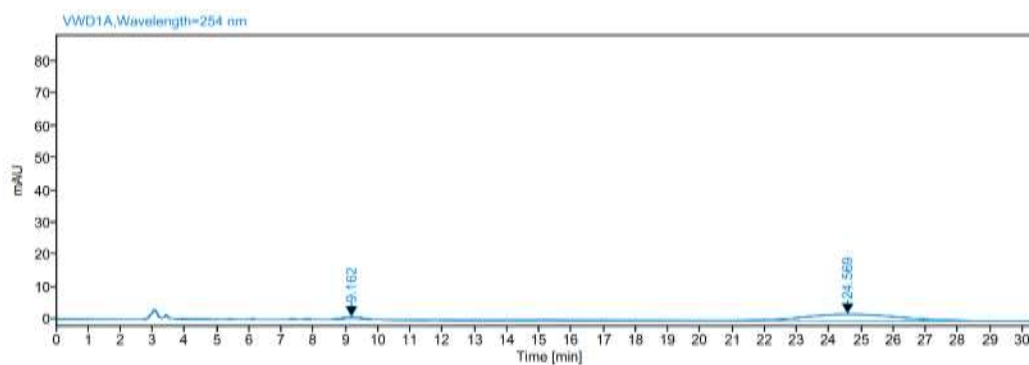

| Signal: VWD1A,Wavelength=254 nm |      |             |        |        |       |      |
|---------------------------------|------|-------------|--------|--------|-------|------|
| RT [min]                        | Type | Width [min] | Area   | Height | Area% | Name |
| 9.162                           | MM m | 2.43        | 45.29  | 0.94   | 9.78  |      |
| 24.569                          | MM m | 10.25       | 417.68 | 2.09   | 90.22 |      |
| Sum                             |      |             | 462.97 |        |       |      |

**(S)-dimethyl(((dimethyl(phenyl)phosphane)boryl)(phenyl)methyl)phosphonate(3ad)**

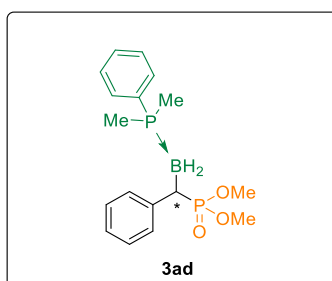

Following the general procedure D, dimethyl (diazophenyl)methyl)phosphonate (0.20 mmol, 1.0 equiv) and dimethyl(phenyl)phosphane borane (0.40 mmol, 2.0 equiv) were employed and stirred at 20 °C for 12 h to afford **3ad** as a colorless oil in 82% yield (57.7 mg) with 95% ee.

$R_f$  = 0.32 (silica gel, EtOAc:PE = 3:1)

$^1\text{H}$  NMR (500 MHz, Chloroform-*d*)  $\delta$  7.52 – 7.38 (m, 5H), 7.21 – 7.16 (m, 2H), 7.12 (t,  $J$  = 7.5 Hz, 2H), 7.06 – 7.00 (m, 1H), 3.59 (dd,  $J$  = 10.3, 8.2 Hz, 6H), 2.55 – 2.43 (m, 1H), 1.29 (d,  $J$  = 10.7 Hz, 3H), 1.17 (d,  $J$  = 10.5 Hz, 3H).

$^{13}\text{C}$  NMR (126 MHz, Chloroform-*d*)  $\delta$  141.6 (t,  $J$  = 7.1 Hz), 131.0, 130.5 (d,  $J$  = 8.6 Hz), 129.2 (d,  $J$  = 7.8 Hz), 129.2 (d,  $J$  = 54.8 Hz), 128.8 (d,  $J$  = 9.7 Hz), 128.0 (d,  $J$  = 2.7 Hz), 125.0 (d,  $J$  = 3.4 Hz), 52.6 (d,  $J$  = 62.8 Hz), 11.5 (d,  $J$  = 39.2 Hz), 9.5 (d,  $J$  = 37.2 Hz).

$^{11}\text{B}$  NMR (202 MHz, Chloroform-*d*)  $\delta$  -26.30 (d,  $J$  = 95.9 Hz).

$^{31}\text{P}$  NMR (160 MHz, Chloroform-*d*)  $\delta$  39.27 (d,  $J$  = 77.6 Hz), -0.42.

HRMS (ESI): calc'd for (M+H)<sup>+</sup> C<sub>17</sub>H<sub>26</sub>BO<sub>3</sub>P<sub>2</sub><sup>+</sup> 351.1445, found 351.1457

HPLC analysis: DAICEL CHIRALCEL IA-3, hexane/isopropanol = 85/15, 1 mL/min,  $\lambda$  = 254 nm,

$t_R$  (major) = 14.190min,  $t_R$  (minor) = 11.937 min, 95% ee.

$[\alpha]_D^{25}$ : +46.2 (*c* 0.5, CHCl<sub>3</sub>).

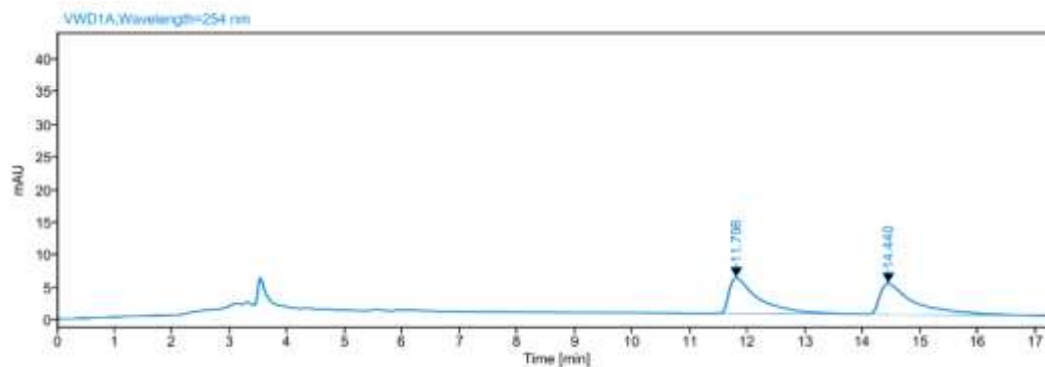

Signal: VWD1A, Wavelength=254 nm

| RT [min] | Type | Width [min] | Area   | Height | Area% | Name |
|----------|------|-------------|--------|--------|-------|------|
| 11.798   | BB   | 2.68        | 197.37 | 5.48   | 49.85 |      |
| 14.440   | BB   | 3.22        | 198.54 | 4.69   | 50.15 |      |
|          |      | Sum         | 395.90 |        |       |      |

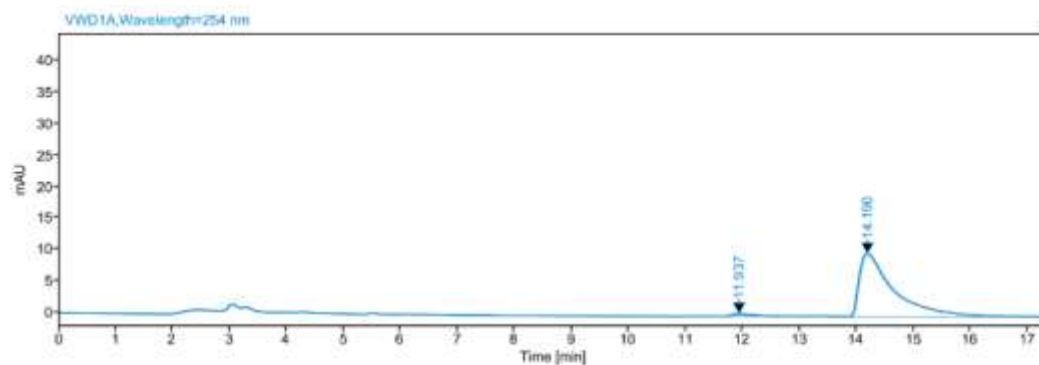

Signal: VWD1A, Wavelength=254 nm

| RT [min] | Type | Width [min] | Area   | Height | Area% | Name |
|----------|------|-------------|--------|--------|-------|------|
| 11.937   | MM m | 1.78        | 10.80  | 0.42   | 2.51  |      |
| 14.190   | BB   | 3.47        | 419.69 | 9.98   | 97.49 |      |
|          |      | Sum         | 430.50 |        |       |      |

### (S)-dimethyl(((diethyl(phenyl)phosphane)boryl)(phenyl)methyl)phosphonate(3ae)

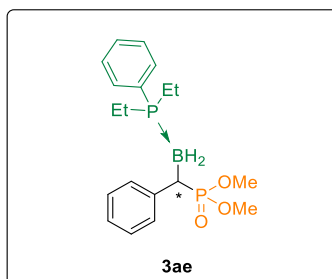

Following the general procedure D, dimethyl (diazophenyl)methylphosphonate (0.20 mmol, 1.0 equiv) and diethyl(phenyl)phosphane borane (0.40 mmol, 2.0 equiv) were employed and stirred at 20 °C for 12 h to afford **3ae** as a colorless oil in 64% yield (48.4 mg) with 92% ee.

$R_f = 0.22$  (silica gel, EtOAc:PE = 3:1)

$^1\text{H NMR}$  (500 MHz, Chloroform-*d*)  $\delta$  7.52 – 7.38 (m, 5H), 7.21 – 7.17 (m, 2H), 7.12 (t,  $J = 7.4$  Hz, 2H), 7.06 – 7.01 (m, 1H), 3.60 (dd,  $J = 17.5, 10.5$  Hz, 6H), 2.49 – 2.37 (m, 1H), 1.78 – 1.64 (m, 2H), 1.56 – 1.45 (m, 1H), 1.43 – 1.32 (m, 1H), 0.95 – 0.87 (m, 3H), 0.87 – 0.78 (m, 3H).

$^{13}\text{C NMR}$  (126 MHz, Chloroform-*d*)  $\delta$  141.9 (dd,  $J = 41.1, 8.2, 5.1$  Hz), 131.7 (d,  $J = 7.4$  Hz), 131.0 (d,  $J = 2.5$  Hz), 129.2 (d,  $J = 7.9$  Hz), 128.7 (d,  $J = 9.1$  Hz), 127.9 (d,  $J = 2.7$  Hz), 126.0 (d,  $J = 51.6$  Hz), 125.0 (d,  $J = 3.4$  Hz), 52.7 (dd,  $J = 62.9, 6.8$  Hz), 15.8 (d,  $J = 35.7$  Hz), 14.0 (d,  $J = 34.4$  Hz), 6.5 (d,  $J = 2.4$  Hz), 6.4 (d,  $J = 3.6$  Hz).

$^{11}\text{B NMR}$  (128 MHz, Chloroform-*d*)  $\delta$  -28.58.

$^{31}\text{P NMR}$  (202 MHz, Chloroform-*d*)  $\delta$  39.57 (d,  $J = 77.7$  Hz), 14.88.

**HRMS (ESI):** calc'd for  $(\text{M}+\text{H})^+ \text{C}_{19}\text{H}_{30}\text{BO}_3\text{P}_2^+$  379.1763, found 379.1755.

**HPLC analysis:** DAICEL CHIRALCEL AD-H, hexane/isopropanol = 80/20, 1 mL/min,  $\lambda = 254$  nm,  $t_R$  (major) = 6.715min,  $t_R$  (minor) = 6.190 min, 92% ee.

$[\alpha]_D^{25}$ : +102.0 (*c* 0.1,  $\text{CHCl}_3$ ).

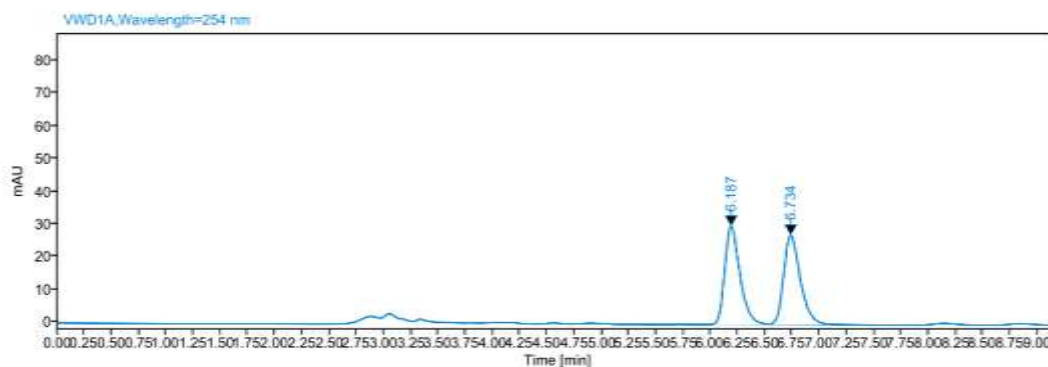

| Signal: VWD1A, Wavelength=254 nm |      |             |        |        |       |      |
|----------------------------------|------|-------------|--------|--------|-------|------|
| RT [min]                         | Type | Width [min] | Area   | Height | Area% | Name |
| 6.187                            | BV   | 0.55        | 292.34 | 30.03  | 49.96 |      |
| 6.734                            | VB   | 1.06        | 292.84 | 27.31  | 50.04 |      |
|                                  |      | Sum         | 585.18 |        |       |      |

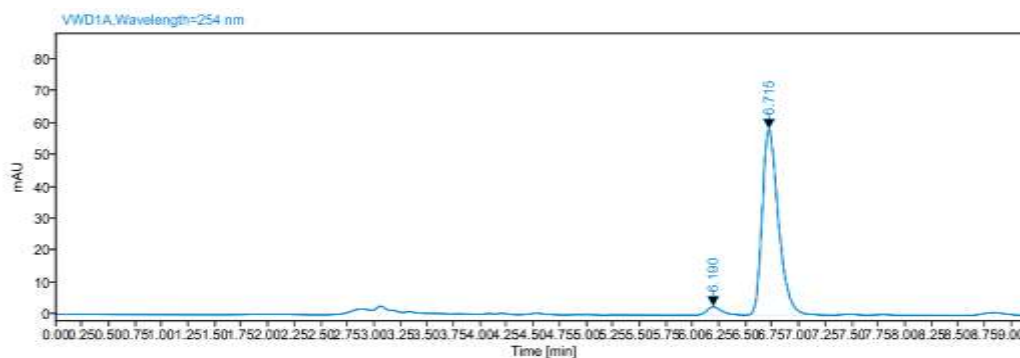

Signal: VWD1A, Wavelength=254 nm

| RT [min] | Type | Width [min] | Area   | Height | Area% | Name |
|----------|------|-------------|--------|--------|-------|------|
| 6.190    | BV   | 0.48        | 24.65  | 2.59   | 3.83  |      |
| 6.715    | VB   | 0.82        | 618.35 | 58.28  | 96.17 |      |
| Sum      |      |             | 642.99 |        |       |      |

**(S)-dimethyl(((dicyclohexyl(phenyl)phosphane)boryl)(phenyl)methyl)phosphonate(3af)**

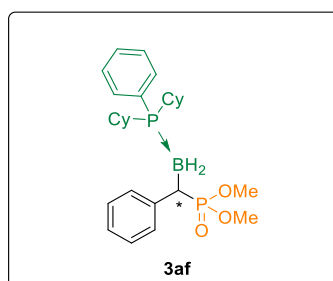

Following the general procedure D, dimethyl (diazo(phenyl)methyl)phosphonate (0.20 mmol, 1.0 equiv) and dicyclohexyl(phenyl)phosphane borane (0.40 mmol, 2.0 equiv) were employed and stirred at 20 °C for 12 h to afford **3af** as a colorless oil in 48% yield (46.2 mg) with 56% ee.

$R_f$  = 0.61 (silica gel, EtOAc:PE = 3:1).

$^1\text{H NMR}$  (400 MHz, Chloroform-*d*)  $\delta$  7.62 – 7.53 (m, 2H), 7.47 – 7.32 (m, 5H), 7.17 (t,  $J$  = 7.5 Hz, 2H), 7.10 – 7.01 (m, 1H), 3.61 (dd,  $J$  = 47.0, 10.4 Hz, 6H), 2.72 – 2.55 (m, 1H), 2.16 – 2.04 (m, 1H), 1.86 – 1.44 (m, 11H), 1.30 – 1.03 (m, 7H), 0.91 (d,  $J$  = 12.5 Hz, 2H), 0.79 – 0.65 (m, 1H).

$^{13}\text{C NMR}$  (101 MHz, Chloroform-*d*)  $\delta$  142.1 (d,  $J$  = 7.8 Hz), 133.3 (d,  $J$  = 6.6 Hz), 130.8 (d,  $J$  = 2.5 Hz), 130.0 (d,  $J$  = 7.6 Hz), 128.3 (d,  $J$  = 9.0 Hz), 127.8 (d,  $J$  = 3.2 Hz), 124.9 (d,  $J$  = 3.9 Hz), 124.0 (d,  $J$  = 49.0 Hz), 52.8 (dd,  $J$  = 49.6, 7.1 Hz), 30.9 (dd,  $J$  = 30.9, 20.4 Hz), 27.2 – 26.1 (m, 8C), 25.7 (d,  $J$  = 8.4 Hz).

$^{31}\text{P NMR}$  (162 MHz, Chloroform-*d*)  $\delta$  39.12 (d,  $J$  = 78.9 Hz), 16.91.

$^{11}\text{B NMR}$  (128 MHz, Chloroform-*d*)  $\delta$  -29.53.

**HRMS (ESI):** calc'd for  $(\text{M}+\text{H})^+$   $\text{C}_{27}\text{H}_{42}\text{BO}_3\text{P}_2^+$  487.2697, found 487.2695.

HPLC analysis: DAICEL CHIRALCEL IA-3, hexane/isopropanol = 80/20, 1 mL/min,  $\lambda = 254$  nm,

$t_R$  (major) = 15.159min,  $t_R$  (minor) = 13.182 min, 56% ee.

$[\alpha]_D^{25}$ : +8.6 (c 0.5, CHCl<sub>3</sub>).

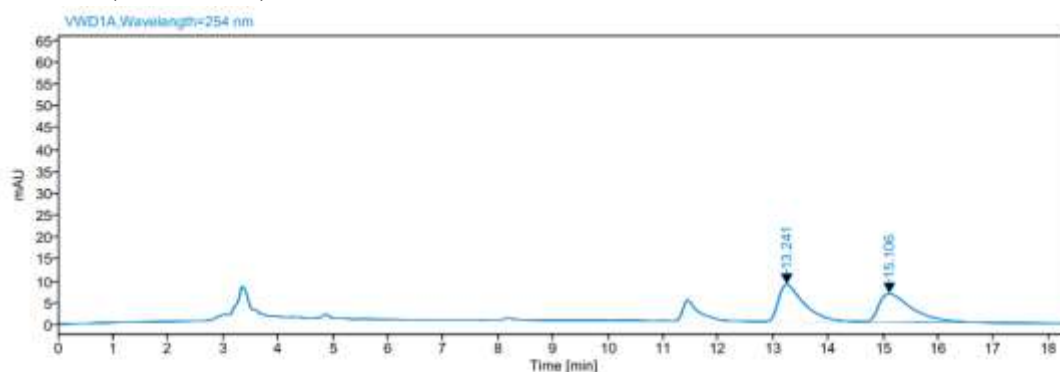

Signal: VWD1A, Wavelength=254 nm

| RT [min] | Type | Width [min] | Area   | Height | Area% | Name |
|----------|------|-------------|--------|--------|-------|------|
| 13.241   | BB   | 1.83        | 272.84 | 8.45   | 50.19 |      |
| 15.106   | BB   | 2.82        | 270.79 | 6.46   | 49.81 |      |
| Sum      |      |             | 543.63 |        |       |      |

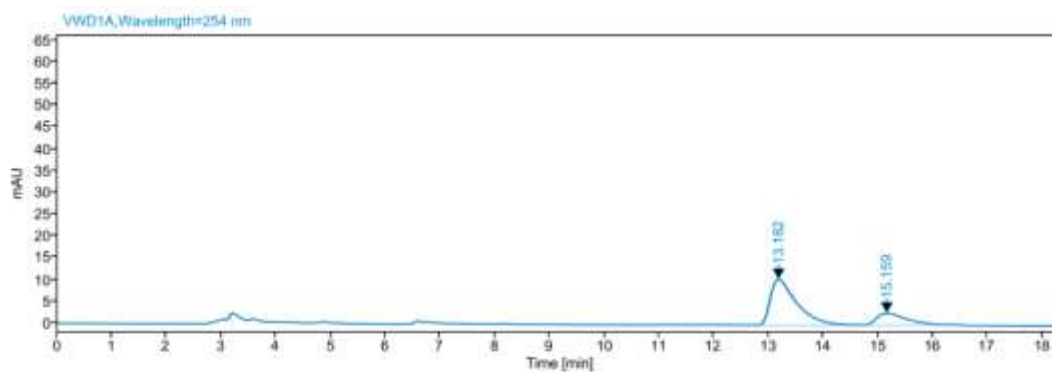

Signal: VWD1A, Wavelength=254 nm

| RT [min] | Type | Width [min] | Area   | Height | Area% | Name |
|----------|------|-------------|--------|--------|-------|------|
| 13.182   | BB   | 1.95        | 350.67 | 10.52  | 77.93 |      |
| 15.159   | BB   | 1.51        | 99.32  | 2.72   | 22.07 |      |
| Sum      |      |             | 449.99 |        |       |      |

(S)-dimethyl(((trimethylphosphane)boryl)([1,1'-biphenyl]-4-yl)methyl)phosphonate(3lg)

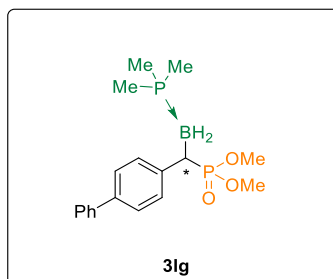

Following the general procedure D, dimethyl ([1,1'-biphenyl]-4-yl(diazo)methyl)phosphonate (0.20 mmol, 1.0 equiv) and trimethylphosphane borane (0.40 mmol, 2.0 equiv) were employed and stirred



at 20 °C for 12 h to afford **3lg** as a colorless oil in 62% yield (44.9 mg) with 94% ee.

$R_f$  = 0.15 (silica gel, EtOAc:PE = 3:1)

$^1\text{H NMR}$  (400 MHz, Chloroform-*d*)  $\delta$  7.61 – 7.53 (m, 2H), 7.51 – 7.44 (m, 2H), 7.44 – 7.36 (m, 4H), 7.32 – 7.27 (m, 1H), 3.67 (dd,  $J$  = 10.5, 2.8 Hz, 6H), 2.71 – 2.53 (m, 1H), 1.12 (d,  $J$  = 10.8 Hz, 9H).

$^{13}\text{C NMR}$  (101 MHz, Chloroform-*d*)  $\delta$  141.2 (t,  $J$  = 8.4 Hz), 141.0, 137.8 (d,  $J$  = 3.5 Hz), 129.5 (d,  $J$  = 7.8 Hz), 128.6, 126.8 (d,  $J$  = 2.6 Hz), 126.8, 126.7, 52.7 (dd,  $J$  = 53.9, 7.0 Hz), 10.9 (d,  $J$  = 37.8 Hz).

$^{11}\text{B NMR}$  (128 MHz, Chloroform-*d*)  $\delta$  -25.14 (d,  $J$  = 83.7 Hz).

$^{31}\text{P NMR}$  (162 MHz, Chloroform-*d*)  $\delta$  38.68 (d,  $J$  = 68.3 Hz), -5.94.

**HRMS (ESI):** calc'd for (M+H)<sup>+</sup> C<sub>18</sub>H<sub>28</sub>BO<sub>3</sub>P<sub>2</sub><sup>+</sup> 365.1601, found 365.1601.

**HPLC analysis:** DAICEL CHIRALCEL ID-3, hexane/isopropanol = 80/20, 1 mL/min,  $\lambda$  = 254 nm,

$t_R$  (major) = 36.678 min,  $t_R$  (minor) = 26.971 min, 94% ee.

$[\alpha]_D^{25}$ : +36.8 (*c* 0.5, CHCl<sub>3</sub>).

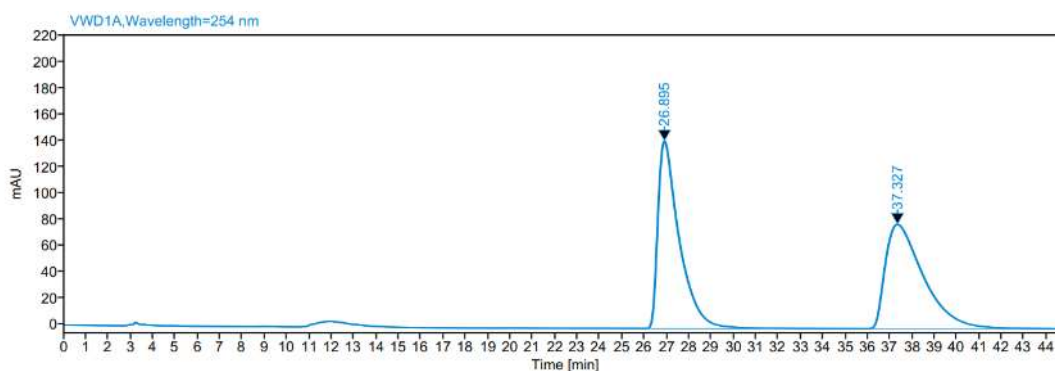

Signal: VWD1A,Wavelength=254 nm

| RT [min] | Type | Width [min] | Area            | Height | Area% | Name |
|----------|------|-------------|-----------------|--------|-------|------|
| 26.895   | BB   | 7.52        | 9493.18         | 142.67 | 50.07 |      |
| 37.327   | BB   | 9.08        | 9467.34         | 79.54  | 49.93 |      |
|          |      | <b>Sum</b>  | <b>18960.52</b> |        |       |      |

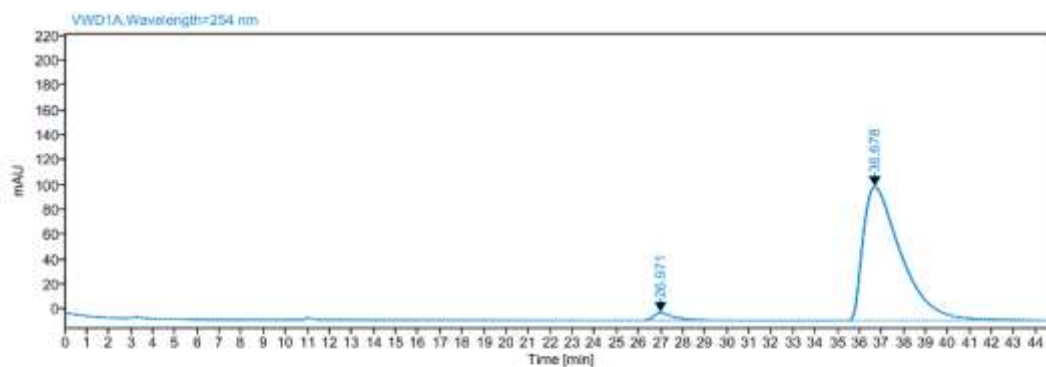

Signal: VWD1A,Wavelength=254 nm

| RT [min] | Type | Width [min] | Area     | Height | Area% | Name |
|----------|------|-------------|----------|--------|-------|------|
| 26.971   | BB   | 4.09        | 378.97   | 6.04   | 2.88  |      |
| 36.678   | BB   | 11.06       | 12796.93 | 107.25 | 97.12 |      |
|          | Sum  |             | 13175.90 |        |       |      |

**(S)-dimethyl(((tributylphosphane)boryl)([1,1'-biphenyl]-4-yl)methyl)phosphonate(3lh)**

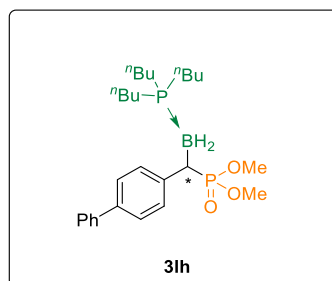

Following the general procedure D, dimethyl ([1,1'-biphenyl]-4-yl)(diazo)methyl)phosphonate (0.20 mmol, 1.0 equiv) and tributylphosphane borane (0.40 mmol, 2.0 equiv) were employed and stirred at 20 °C for 12 h to afford **3lh** as a colorless oil in 82% yield (80.0 mg) with 93% ee.

$R_f$  = 0.72 (silica gel, EtOAc:PE = 3:1)

$^1\text{H NMR}$  (500 MHz, Chloroform-*d*)  $\delta$  7.56 – 7.51 (m, 2H), 7.44 (d,  $J$  = 8.0 Hz, 2H), 7.42 – 7.37 (m, 4H), 7.30 – 7.26 (m, 1H), 3.66 (dd,  $J$  = 14.2, 10.5 Hz, 6H), 2.59 – 2.48 (m, 1H), 1.45 – 1.36 (m, 3H), 1.32 – 1.21 (m, 15H), 0.84 (t,  $J$  = 7.0 Hz, 9H).

$^{13}\text{C NMR}$  (126 MHz, Chloroform-*d*)  $\delta$  141.6 (dd,  $J$  = 8.7, 5.2 Hz), 141.1, 137.8 (d,  $J$  = 3.6 Hz), 129.5 (d,  $J$  = 7.8 Hz), 128.5, 126.7, 52.7 (dd,  $J$  = 52.5, 7.0 Hz), 24.3 (d,  $J$  = 3.2 Hz), 24.2 (d,  $J$  = 6.6 Hz), 20.6 (d,  $J$  = 33.3 Hz), 13.4.

$^{11}\text{B NMR}$  (128 MHz, Chloroform-*d*)  $\delta$  -28.05.

$^{31}\text{P NMR}$  (202 MHz, Chloroform-*d*)  $\delta$  39.44 (d,  $J$  = 75.8 Hz), 9.29.

**HRMS (ESI):** calc'd for (M+H)<sup>+</sup> C<sub>27</sub>H<sub>46</sub>BO<sub>3</sub>P<sub>2</sub><sup>+</sup> 491.3010, found 491.3010.

**HPLC analysis:** DAICEL CHIRALCEL AD-H, hexane/isopropanol = 90/10, 1 mL/min,  $\lambda$  = 254

nm,  $t_R$  (major) = 5.987 min,  $t_R$  (minor) = 5.549 min, 93% ee.

$[\alpha]_D^{25}$ : +45.0 ( $c$  0.5,  $\text{CHCl}_3$ ).

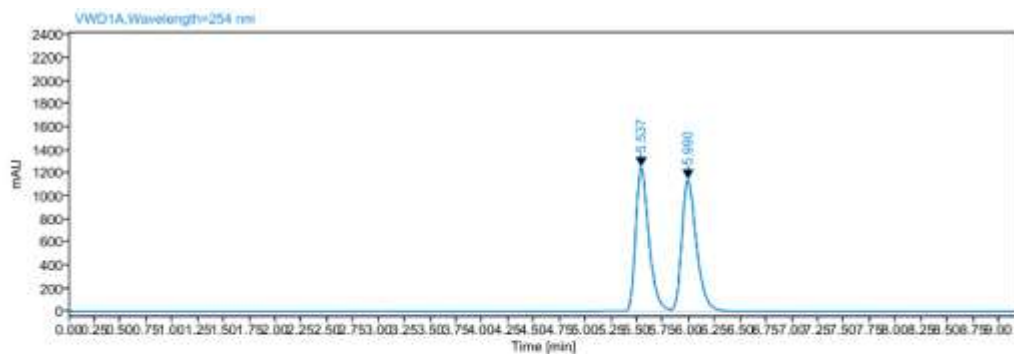

Signal: VWD1A, Wavelength=254 nm

| RT [min] | Type | Width [min] | Area            | Height  | Area% | Name |
|----------|------|-------------|-----------------|---------|-------|------|
| 5.537    | VV   | 0.45        | 11187.92        | 1251.36 | 49.50 |      |
| 5.990    | VV   | 0.72        | 11414.42        | 1144.41 | 50.50 |      |
|          |      | <b>Sum</b>  | <b>22602.34</b> |         |       |      |

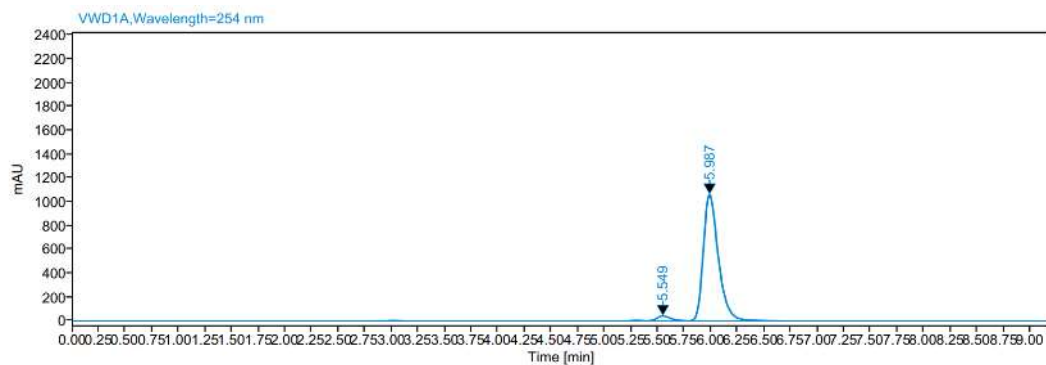

Signal: VWD1A, Wavelength=254 nm

| RT [min] | Type | Width [min] | Area            | Height  | Area% | Name |
|----------|------|-------------|-----------------|---------|-------|------|
| 5.549    | VV   | 0.38        | 373.78          | 42.34   | 3.45  |      |
| 5.987    | VB   | 1.86        | 10463.83        | 1062.27 | 96.55 |      |
|          |      | <b>Sum</b>  | <b>10837.60</b> |         |       |      |

### (S)-dimethyl(((trimethylphosphite)boryl)([1,1'-biphenyl]-4-yl)methyl)phosphonate(**3li**)

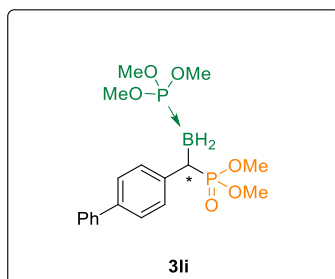

Following the general procedure D, dimethyl([1,1'-biphenyl]-4-yl(diazo)methyl)phosphonate (0.20 mmol, 1.0 equiv) and trimethylphosphite borane (0.40 mmol, 2.0 equiv) were employed and stirred at 20 °C for 12 h to afford **3li** as a white solid in 71% yield (58.4 mg) with 93% ee.

mp = 71.9 – 72.5 °C

R<sub>f</sub> = 0.10 (silica gel, EtOAc)

<sup>1</sup>H NMR (500 MHz, Chloroform-*d*) δ 7.59 – 7.55 (m, 2H), 7.47 (d, *J* = 7.9 Hz, 2H), 7.43 – 7.37 (m, 4H), 7.32 – 7.27 (m, 1H), 3.66 (dd, *J* = 33.9, 10.3 Hz, 6H), 3.53 (d, *J* = 10.6 Hz, 9H), 2.67 – 2.51 (m, 1H).

<sup>13</sup>C NMR (101 MHz, Chloroform-*d*) δ 141.2 (dd, *J* = 8.2, 6.0 Hz), 141.0, 137.5 (d, *J* = 3.4 Hz), 129.5 (d, *J* = 8.0 Hz), 128.6, 126.7, 126.7, 126.5 (d, *J* = 2.6 Hz), 53.1 (d, *J* = 5.0 Hz), 53.0 (d, *J* = 6.8 Hz), 52.4 (d, *J* = 6.9 Hz).

<sup>11</sup>B NMR (160 MHz, Chloroform-*d*) δ -32.52 (d, *J* = 105.6 Hz).

<sup>31</sup>P NMR (202 MHz, Chloroform-*d*) δ 106.12, 39.16 (d, *J* = 101.0 Hz).

HRMS (ESI): calc'd for (M+H)<sup>+</sup> C<sub>18</sub>H<sub>28</sub>BO<sub>6</sub>P<sub>2</sub> + 413.1449, found 413.1448.

HPLC analysis: DAICEL CHIRALCEL AD-H, hexane/isopropanol = 70/30, 1 mL/min, λ = 254

nm, t<sub>R</sub> (major) = 6.109 min, t<sub>R</sub> (minor) = 5.149 min, 93% ee.

[α]<sub>D</sub><sup>25</sup>: +67.2 (c 0.5, CHCl<sub>3</sub>).

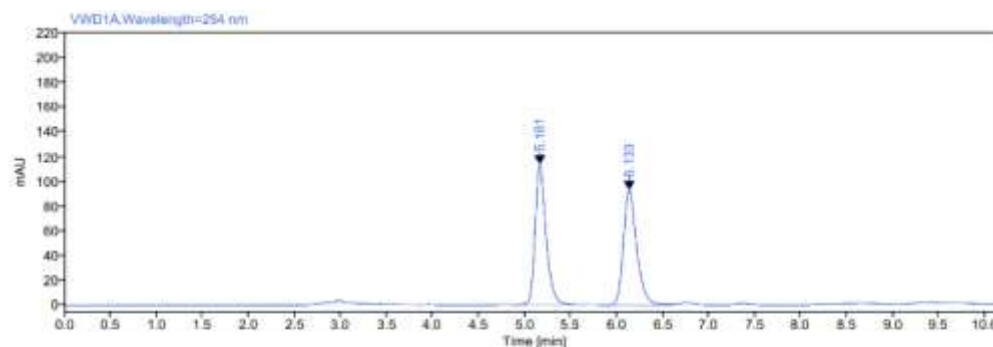

| Signal: VWD1A, Wavelength=254 nm |      |             |         |        |       |      |
|----------------------------------|------|-------------|---------|--------|-------|------|
| RT [min]                         | Type | Width [min] | Area    | Height | Area% | Name |
| 5.161                            | VB   | 0.75        | 932.21  | 112.77 | 50.04 |      |
| 6.133                            | BV   | 0.71        | 930.84  | 92.24  | 49.96 |      |
| Sum                              |      |             | 1863.04 |        |       |      |

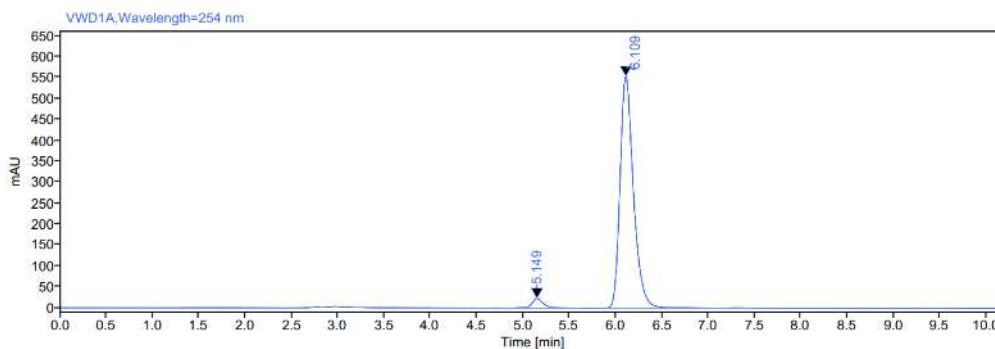

Signal: VWD1A,Wavelength=254 nm

| RT [min] | Type | Width [min] | Area    | Height | Area% | Name |
|----------|------|-------------|---------|--------|-------|------|
| 5.149    | BB   | 0.89        | 193.37  | 22.94  | 3.35  |      |
| 6.109    | BB   | 1.29        | 5576.40 | 553.78 | 96.65 |      |
| Sum      |      |             | 5769.78 |        |       |      |

**(S)-diethyl(((methyl)diphenylphosphane)boryl)(phenyl)methylphosphonate(5aa)**

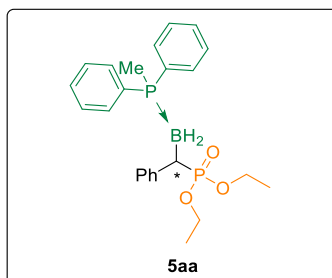

Following the general procedure D, diethyl (diazo(phenyl)methyl)phosphonate (0.20 mmol, 1.0 equiv) and methyl diphenylphosphane borane (0.40 mmol, 2.0 equiv) were employed and stirred at 20 °C for 12 h to afford **5aa** as a white solid in 77% yield (67.8 mg) with 92% ee.

**mp:** 112.2 – 113.3 °C

**R<sub>f</sub>** = 0.56 (silica gel, EtOAc:PE = 3:1)

**<sup>1</sup>H NMR (500 MHz, Chloroform-*d*)** δ 7.53 – 7.37 (m, 8H), 7.32 (t, *J* = 7.5 Hz, 2H), 7.15 – 7.05 (m, 4H), 7.00 (t, *J* = 7.2 Hz, 1H), 4.04 – 3.80 (m, 4H), 2.48 – 2.33 (m, 1H), 1.30 (d, *J* = 10.2 Hz, 3H), 1.17 (t, *J* = 6.9 Hz, 3H), 1.11 (t, *J* = 7.0 Hz, 3H).

**<sup>13</sup>C NMR (101 MHz, Chloroform-*d*)** δ 141.8 (dd, *J* = 8.4, 5.6 Hz), 131.8 (dd, *J* = 20.9, 8.8 Hz), 131.0 (dd, *J* = 21.6, 2.5 Hz), 130.1, 129.5 (d, *J* = 7.8 Hz), 128.7 (dd, *J* = 22.7, 9.9 Hz), 127.9 (d, *J* = 54.8 Hz), 127.8 (d, *J* = 2.8 Hz), 124.8 (d, *J* = 3.4 Hz), 61.4 (dd, *J* = 61.0, 6.9 Hz), 16.3 (t, *J* = 5.7 Hz), 9.3 (d, *J* = 36.6 Hz).

**<sup>11</sup>B NMR (160 MHz, Chloroform-*d*)** δ -26.75.

**<sup>31</sup>P NMR (202 MHz, Chloroform-*d*)** δ 36.86 (d, *J* = 82.3 Hz), 6.44.

**HRMS (ESI):** calc'd for (M+H)<sup>+</sup> C<sub>24</sub>H<sub>32</sub>BO<sub>3</sub>P<sub>2</sub><sup>+</sup> 441.1914, found 441.1926.

**HPLC analysis:** DAICEL CHIRALCEL AD-H, hexane/isopropanol = 70/30, 1 mL/min,  $\lambda = 254$

nm,  $t_R$  (major) = 7.087 min,  $t_R$  (minor) = 5.908 min, 92% ee.

$[\alpha]_D^{25}$ : +29.8 (c 0.5,  $\text{CHCl}_3$ ).

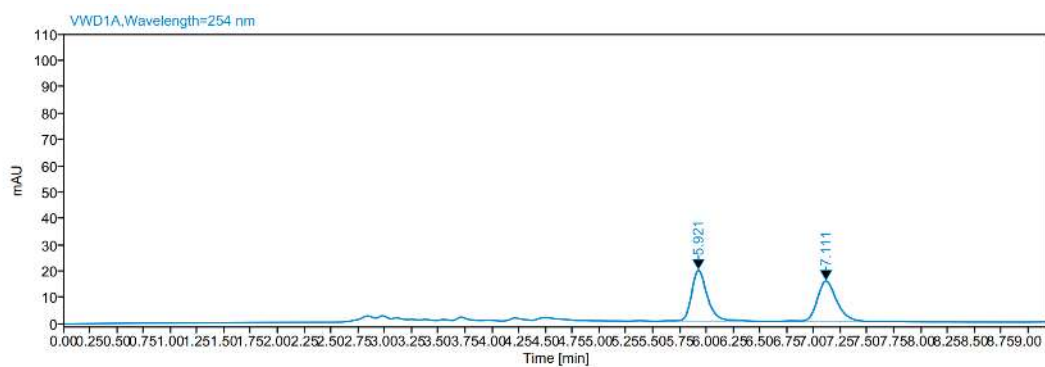

Signal: VWD1A, Wavelength=254 nm

| RT [min] | Type       | Width [min] | Area          | Height | Area% | Name |
|----------|------------|-------------|---------------|--------|-------|------|
| 5.921    | BB         | 1.09        | 200.41        | 19.43  | 50.96 |      |
| 7.111    | BB         | 0.94        | 192.88        | 15.35  | 49.04 |      |
|          | <b>Sum</b> |             | <b>393.29</b> |        |       |      |

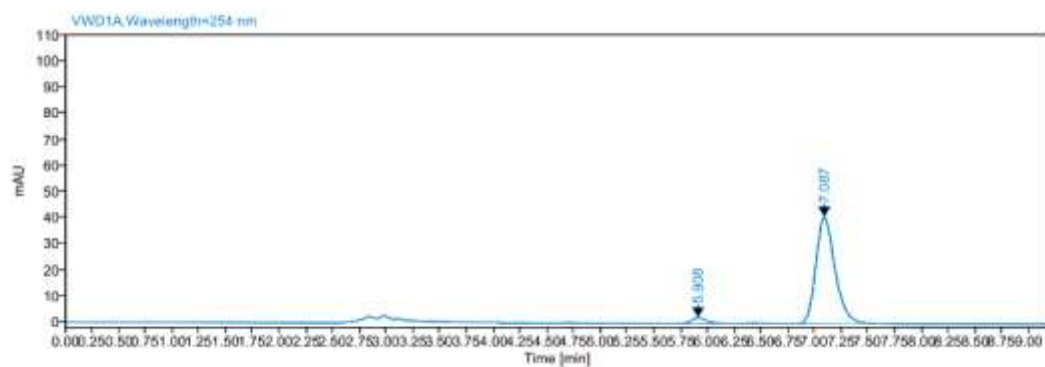

Signal: VWD1A, Wavelength=254 nm

| RT [min] | Type       | Width [min] | Area          | Height | Area% | Name |
|----------|------------|-------------|---------------|--------|-------|------|
| 5.908    | BB         | 0.59        | 21.62         | 2.17   | 4.07  |      |
| 7.087    | BB         | 1.59        | 510.07        | 40.76  | 95.93 |      |
|          | <b>Sum</b> |             | <b>531.69</b> |        |       |      |

**(S)-diisopropyl(((methylphenylphosphane)boryl)(phenyl)methyl)phosphonate(5ba)**

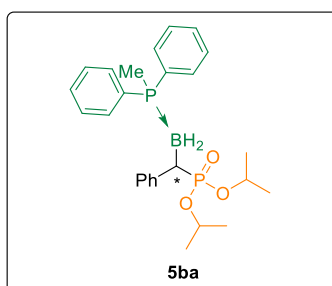

Following the general procedure D, diisopropyl(diazo(phenyl)methyl)phosphonate (0.20 mmol, 1.0

equiv) and methyldiphenylphosphane borane (0.40 mmol, 2.0 equiv) were employed and stirred at 20 °C for 12 h to afford **5ba** as a yellow oil in 94% yield (88.4 mg) with 90% ee.

$R_f$  = 0.67 (silica gel, EtOAc:PE = 3:1)

$^1\text{H NMR}$  (400 MHz, Chloroform-*d*)  $\delta$  7.51 – 7.36 (m, 8H), 7.35 – 7.28 (m, 2H), 7.15 – 7.02 (m, 4H), 6.98 (dd,  $J$  = 8.3, 6.1 Hz, 1H), 4.68 – 4.42 (m, 2H), 2.33 (m, 1H), 1.29 (d,  $J$  = 10.2 Hz, 3H), 1.23 – 1.15 (m, 9H), 0.89 (d,  $J$  = 6.2 Hz, 3H).

$^{13}\text{C NMR}$  (101 MHz, Chloroform-*d*)  $\delta$  142.5 (dd,  $J$  = 8.3, 4.9 Hz), 131.8 (dd,  $J$  = 20.3, 8.9 Hz), 131.0 (dd,  $J$  = 20.5, 2.5 Hz), 130.0 (d,  $J$  = 58.9 Hz), 129.6 (d,  $J$  = 7.9 Hz), 128.7 (dd,  $J$  = 21.8, 9.9 Hz), 128.1 (d,  $J$  = 54.4 Hz), 127.6 (d,  $J$  = 2.7 Hz), 124.6 (d,  $J$  = 3.4 Hz), 69.3 (dd,  $J$  = 64.5, 7.3 Hz), 24.2 (dd,  $J$  = 23.4, 3.0 Hz), 23.6 (dd,  $J$  = 64.6, 5.7 Hz), 9.3 (d,  $J$  = 36.3 Hz).

$^{11}\text{B NMR}$  (128 MHz, Chloroform-*d*)  $\delta$  -25.90.

$^{31}\text{P NMR}$  (162 MHz, Chloroform-*d*)  $\delta$  34.57 (d,  $J$  = 85.4 Hz), 6.20.

**HRMS (ESI):** calc'd for (M+H)<sup>+</sup> C<sub>26</sub>H<sub>36</sub>BO<sub>3</sub>P<sub>2</sub><sup>+</sup> 469.2227, found 469.2227.

**HPLC analysis:** DAICEL CHIRALCEL IA-3, hexane/isopropanol = 90/10, 1 mL/min,  $\lambda$  = 254 nm,

$t_R$  (major) = 17.076 min,  $t_R$  (minor) = 14.861 min, 90% ee.

$[\alpha]_D^{25}$ : +49.0 (c 0.5, CHCl<sub>3</sub>).

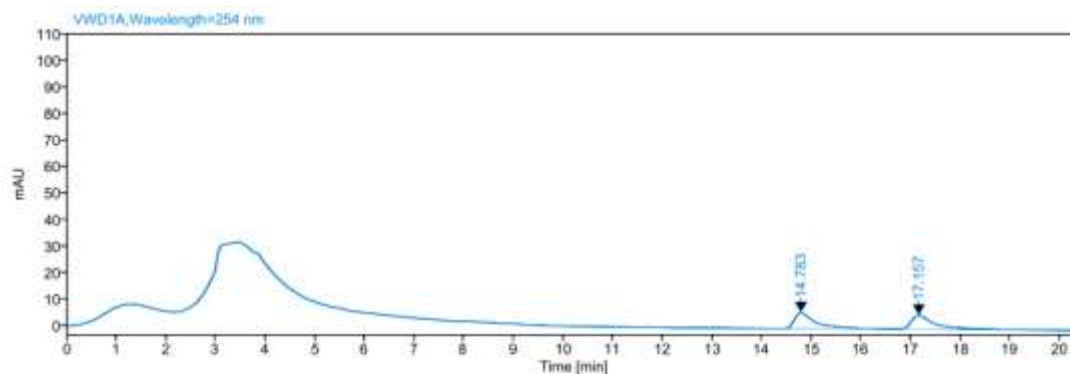

| Signal: VWD1A, Wavelength=254 nm |      |             |        |        |       |      |
|----------------------------------|------|-------------|--------|--------|-------|------|
| RT [min]                         | Type | Width [min] | Area   | Height | Area% | Name |
| 14.783                           | BB   | 2.35        | 184.37 | 5.97   | 50.68 |      |
| 17.157                           | BB   | 2.58        | 179.44 | 5.21   | 49.32 |      |
|                                  |      | Sum         | 363.80 |        |       |      |

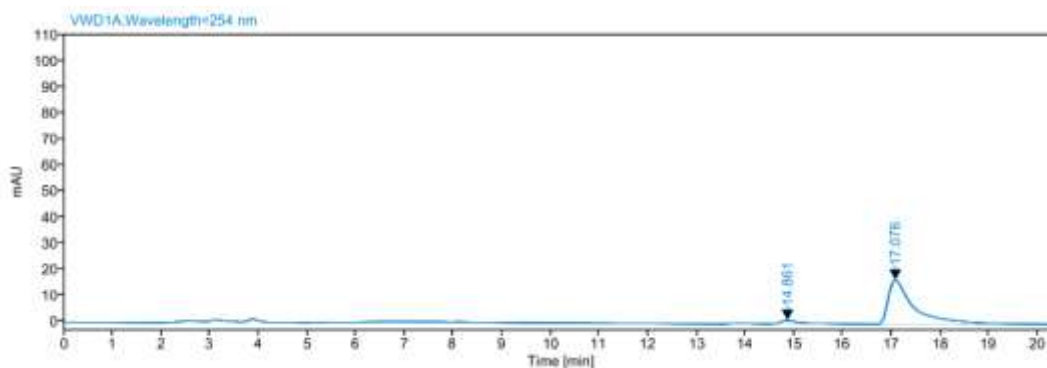

| Signal: VWD1A,Wavelength=254 nm |      |             |        |        |       |      |
|---------------------------------|------|-------------|--------|--------|-------|------|
| RT [min]                        | Type | Width [min] | Area   | Height | Area% | Name |
| 14.861                          | MM m | 1.18        | 32.92  | 1.33   | 4.93  |      |
| 17.076                          | BB   | 3.71        | 634.45 | 16.90  | 95.07 |      |
| Sum                             |      |             | 667.36 |        |       |      |

**(S)-dihexyl(((methylphenylphosphane)boryl)(phenyl)methyl)phosphonate(5ca)**

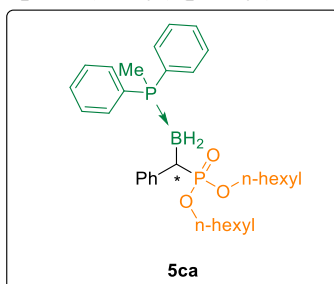

Following the general procedure D, dihexyl(diazo(phenyl)methyl)phosphonate (0.20 mmol, 1.0 equiv) and methylphenylphosphane borane (0.40 mmol, 2.0 equiv) were employed and stirred at 20 °C for 12 h to afford **5ca** as a yellow oil in 91% yield (100.6 mg) with 92% ee.

$R_f$  = 0.86 (silica gel, EtOAc:PE = 3:1)

$^1\text{H}$  NMR (400 MHz, Chloroform-*d*)  $\delta$  7.51 – 7.36 (m, 8H), 7.34 – 7.28 (m, 2H), 7.15 – 7.04 (m, 4H), 7.03 – 6.95 (m, 1H), 3.95 – 3.74 (m, 4H), 2.49 – 2.33 (m, 1H), 1.56 – 1.40 (m, 4H), 1.31 (d,  $J$  = 10.2 Hz, 3H), 1.27 – 1.14 (m, 12H), 0.83 (t,  $J$  = 6.7 Hz, 6H).

$^{13}\text{C}$  NMR (101 MHz, Chloroform-*d*)  $\delta$  141.9 (dd,  $J$  = 8.5, 5.3 Hz), 131.8 (dd,  $J$  = 19.3, 8.9 Hz), 131.0 (dd,  $J$  = 19.9, 2.5 Hz), 129.8 (d,  $J$  = 57.6 Hz), 129.5 (d,  $J$  = 7.7 Hz), 128.7 (dd,  $J$  = 22.1, 9.9 Hz), 128.0 (d,  $J$  = 54.8 Hz), 127.7 (d,  $J$  = 2.8 Hz), 124.8 (d,  $J$  = 3.5 Hz), 65.5 (dd,  $J$  = 58.7, 7.2 Hz), 31.3, 30.5 (d,  $J$  = 6.3 Hz), 25.1 (d,  $J$  = 2.6 Hz), 22.4 (d,  $J$  = 1.7 Hz), 13.9, 9.3 (d,  $J$  = 36.6 Hz).

$^{31}\text{P}$  NMR (162 MHz, Chloroform-*d*)  $\delta$  35.94 (d,  $J$  = 84.0 Hz), 5.84.

$^{11}\text{B}$  NMR (128 MHz, Chloroform-*d*)  $\delta$  -25.97.

HRMS (ESI): calc'd for (M+H) $^+$  C<sub>32</sub>H<sub>48</sub>BO<sub>3</sub>P<sub>2</sub> $^+$  553.3166, found 553.3166.

HPLC analysis: DAICEL CHIRALCEL IA-3, hexane/isopropanol = 85/15, 1 mL/min,  $\lambda$  = 254 nm,



$t_R$  (major) = 12.220 min,  $t_R$  (minor) = 10.736 min, 92% ee.

$[\alpha]_D^{25}$ : +36.4 ( $c$  0.5,  $\text{CHCl}_3$ ).

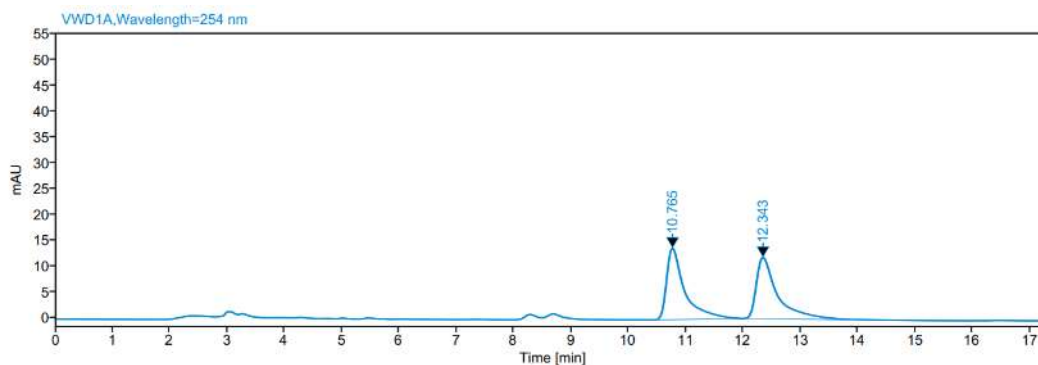

Signal: VWD1A, Wavelength=254 nm

| RT [min] | Type       | Width [min] | Area          | Height | Area% | Name |
|----------|------------|-------------|---------------|--------|-------|------|
| 10.765   | BB         | 1.58        | 303.63        | 13.81  | 49.81 |      |
| 12.343   | BB         | 2.54        | 305.89        | 11.84  | 50.19 |      |
|          | <b>Sum</b> |             | <b>609.53</b> |        |       |      |

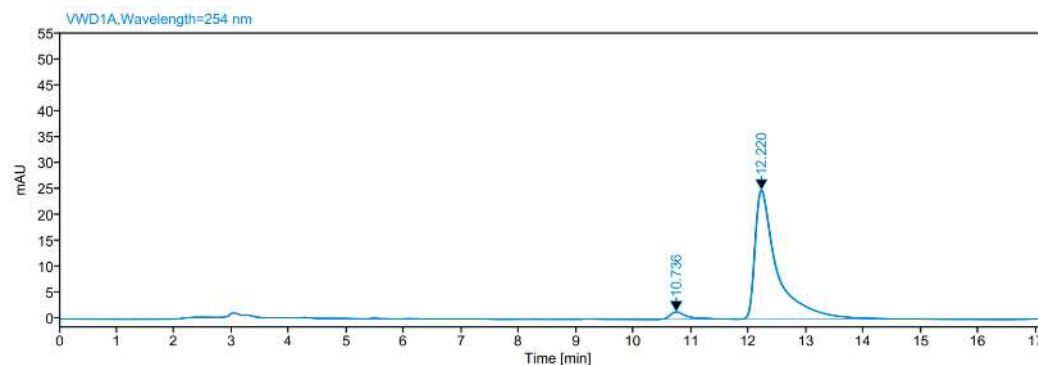

Signal: VWD1A, Wavelength=254 nm

| RT [min] | Type       | Width [min] | Area          | Height | Area% | Name |
|----------|------------|-------------|---------------|--------|-------|------|
| 10.736   | MM m       | 1.04        | 28.13         | 1.40   | 4.03  |      |
| 12.220   | BB         | 3.21        | 669.54        | 24.86  | 95.97 |      |
|          | <b>Sum</b> |             | <b>697.67</b> |        |       |      |

### 1.5 Further synthetic transformation

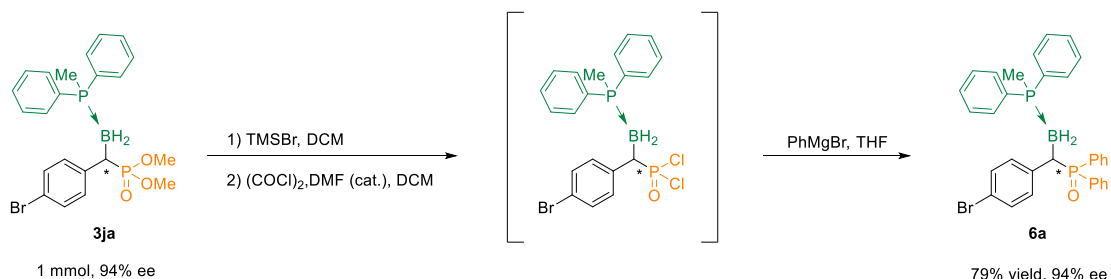

#### (S)-(((methylphenylphosphane)boryl)(4-bromophenyl)methyl)diphenylphosphine oxide (6a)

An oven-dried 25 mL vial with a magnetic stir bar was charged with (S)-dimethyl((methylphenylphosphane-boryl)(4-bromophenyl)methyl)phosphonate (**3ja**, 491.1 mg,

1.0 mmol, 1.0 equiv) and capped under argon. DCM (10 mL) was added via syringe and the mixture was stirred for 1 min. TMSBr (0.4 mL, 3.0 mmol, 3.0 equiv) was added dropwise under r.t., and the mixture was stirred for 30 min under r.t.

Volatiles were removed under reduced pressure. The crude residue was redissolved in DCM (10 mL) and DMF (50  $\mu$ L) was added, followed by (COCl)<sub>2</sub> (0.35 mL, 4.0 mmol, 4.0 equiv) under 0 °C. The mixture was warmed to r.t. and stirred for 2 h.

The mixture was concentrated under reduced pressure and THF (10 mL) was added. Then, PhMgBr (6.0 mL, 6.0 mmol, 6.0 equiv, 1.0 mol in THF) were added dropwise under -78 °C. After the addition is completed, the mixture was warmed to r.t. and stirred overnight.

Aqueous NH<sub>4</sub>Cl (10 mL) was added and the mixture was extracted with EtOAc (5 mL  $\times$  3). The organic layers were combined, washed with brine (5.0 mL), dried over Na<sub>2</sub>SO<sub>4</sub>, and concentrated under reduced pressure. The crude product was purified by flash column chromatography to afford **6a** as a white solid in 79% yield (462.7 mg) with 94% ee.<sup>10</sup>

**mp:** 220.1 – 221.1 °C

**R<sub>f</sub>** = 0.31 (silica gel, EtOAc:PE = 3:1)

**<sup>1</sup>H NMR (500 MHz, Chloroform-*d*)**  $\delta$  7.86 – 7.77 (m, 2H), 7.54 (t, *J* = 7.4 Hz, 1H), 7.46 – 7.38 (m, 8H), 7.36 – 7.31 (m, 4H), 7.30 – 7.26 (m, 2H), 7.20 (t, *J* = 7.2 Hz, 1H), 7.13 (td, *J* = 7.6, 2.6 Hz, 2H), 7.05 (d, *J* = 8.1 Hz, 2H), 6.96 (d, *J* = 6.4 Hz, 2H), 2.84 – 2.72 (m, 1H), 1.30 (d, *J* = 10.1 Hz, 3H).

**<sup>13</sup>C NMR (126 MHz, Chloroform-*d*)**  $\delta$  140.8 (dd, *J* = 6.9, 3.1 Hz), 134.9 (d, *J* = 92.5 Hz), 134.2 (d, *J* = 96.4 Hz), 131.8 (d, *J* = 9.0 Hz), 131.6 (d, *J* = 7.8 Hz), 131.4 (d, *J* = 8.1 Hz), 131.2 (d, *J* = 37.8 Hz), 130.8 (d, *J* = 8.4 Hz), 130.7, 130.4 (d, *J* = 54.6 Hz), 129.4 (d, *J* = 58.1 Hz), 128.8 (dd, *J* = 32.3, 10.0 Hz), 127.7 (dd, *J* = 35.1, 11.2 Hz), 127.4 (d, *J* = 54.4 Hz), 118.4 (d, *J* = 3.8 Hz), 9.5 (d, *J* = 36.9 Hz).

**<sup>11</sup>B NMR (160 MHz, Chloroform-*d*)**  $\delta$  -26.84.

**<sup>31</sup>P NMR (162 MHz, Chloroform-*d*)**  $\delta$  36.42 (d, *J* = 74.8 Hz), 7.11.

**HRMS (ESI):** calc'd for (M+H)<sup>+</sup> C<sub>32</sub>H<sub>31</sub>BBrOP<sub>2</sub><sup>+</sup> 583.1121, found 583.1127.

**HPLC analysis:** DAICEL CHIRALCEL AD-H, hexane/isopropanol = 60/40, 1 mL/min,  $\lambda$  = 254 nm, *t<sub>R</sub>* (major) = 14.894 min, *t<sub>R</sub>* (minor) = 13.333 min, 94% ee.

**[ $\alpha$ ]<sub>D</sub><sup>25</sup>:** -20.8 (*c* 0.5, CHCl<sub>3</sub>).

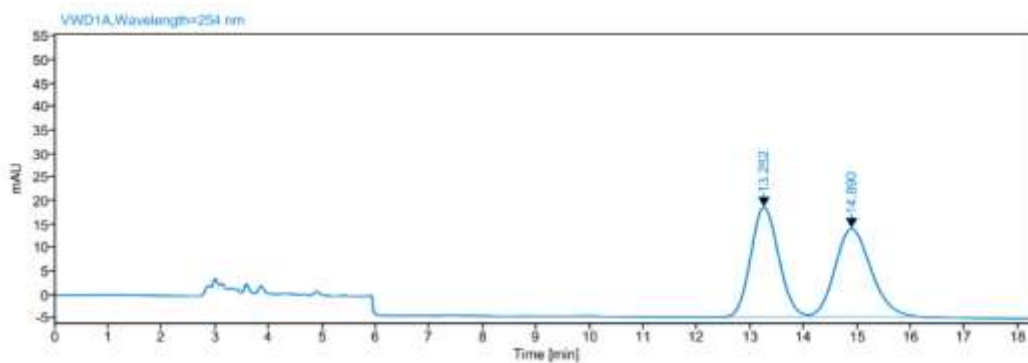

Signal: VWD1A,Wavelength=254 nm

| RT [min] | Type | Width [min] | Area    | Height | Area% | Name |
|----------|------|-------------|---------|--------|-------|------|
| 13.252   | BM m | 1.65        | 849.15  | 23.33  | 49.11 |      |
| 14.890   | MM m | 2.09        | 880.07  | 18.79  | 50.89 |      |
| Sum      |      |             | 1729.22 |        |       |      |

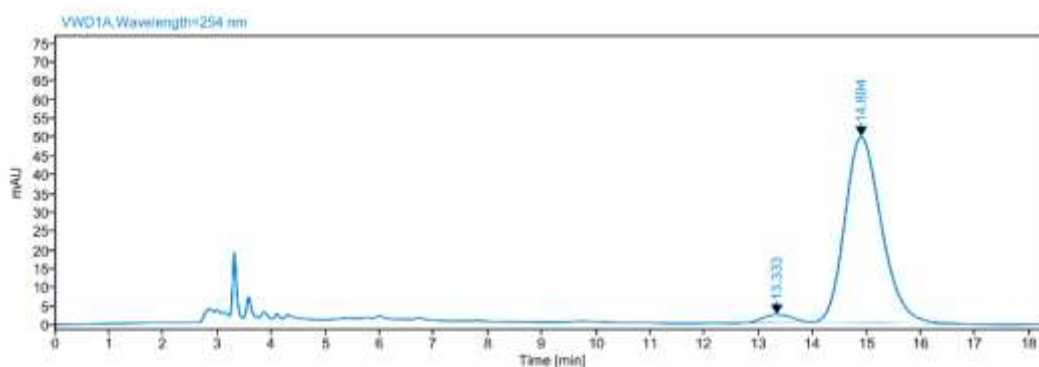

Signal: VWD1A,Wavelength=254 nm

| RT [min] | Type | Width [min] | Area    | Height | Area% | Name |
|----------|------|-------------|---------|--------|-------|------|
| 13.333   | BB   | 1.35        | 77.51   | 2.01   | 3.23  |      |
| 14.894   | BB   | 3.43        | 2321.87 | 49.43  | 96.77 |      |
| Sum      |      |             | 2399.38 |        |       |      |

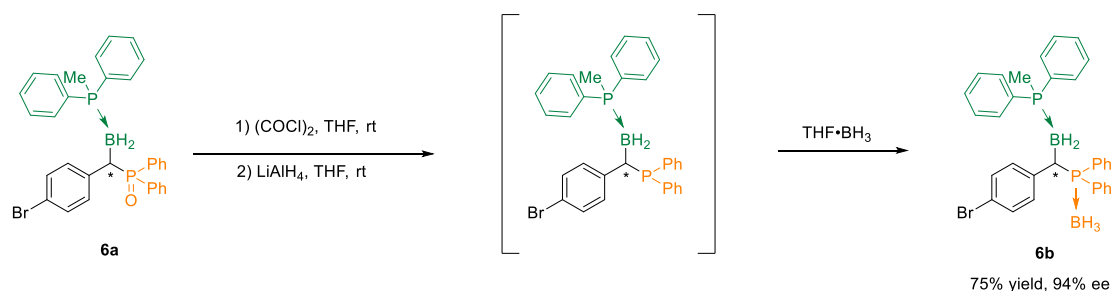

**(S)-(((methylphenylphosphane)boryl)(4-bromophenyl)methyl)diphenylphosphane-borane (6b)**

Under argon, a mixture of **6a** (58.3 mg, 0.10 mmol) in DCM (1.0 mL), oxalyl chloride (20.0  $\mu\text{L}$ , 0.23 mmol, 2.3 equiv) was added dropwise at 0  $^\circ\text{C}$ , and then stirred to room temperature for 0.5 h. then the reaction mixture was evaporated to dryness in vacuo. To a solution of mixture in THF (1.0 mL) was added  $\text{LiAlH}_4$  (0.1 mL, 0.25 mmol, 2.5 equiv, 2.5 mol/L in THF) at 0  $^\circ\text{C}$ , and then the

stirred mixture to room temperature for 12 h.

$\text{BH}_3 \cdot \text{THF}$  (0.20 mL, 0.20 mmol, 2.0 equiv, 1 mol/L in THF) was then added dropwise to the obtained mixture at 0 °C and stirred at the same temperature for 3 h. Then, aqueous  $\text{NaHCO}_3$  (5 mL) was slowly added and the mixture was extracted with EtOAc (3 mL $\times$ 3). The organic layers were combined, washed with brine (5 mL), dried over  $\text{Na}_2\text{SO}_4$ , and concentrated under reduced pressure. The crude product was purified by flash column chromatography to afford **6b** as a colorless oil in 75% yield (43.6 mg) with 94% ee.<sup>11</sup>

$R_f$  = 0.10 (silica gel, EtOAc:PE = 1:10)

**$^1\text{H}$  NMR (400 MHz, Chloroform-*d*)**  $\delta$  7.79 (t,  $J$  = 8.8 Hz, 2H), 7.56 (t,  $J$  = 7.5 Hz, 1H), 7.50 – 7.27 (m, 14H), 7.23 (d,  $J$  = 7.1 Hz, 1H), 7.16 (d,  $J$  = 7.5 Hz, 2H), 7.08 (d,  $J$  = 8.0 Hz, 2H), 6.89 (d,  $J$  = 8.0 Hz, 2H), 2.85 – 2.71 (m, 1H), 1.26 (d,  $J$  = 9.7 Hz, 3H).

**$^{13}\text{C}$  NMR (101 MHz, Chloroform-*d*)**  $\delta$  140.9, 133.6 (d,  $J$  = 8.1 Hz), 132.3 (d,  $J$  = 5.7 Hz), 132.2 (d,  $J$  = 8.1 Hz), 131.8 (dd,  $J$  = 12.3, 9.0 Hz), 131.3 (dd,  $J$  = 26.9, 2.5 Hz), 130.5 (d,  $J$  = 2.9 Hz), 129.9, 129.7 (d,  $J$  = 2.2 Hz), 129.4 (d,  $J$  = 58.1 Hz), 128.9 (dd,  $J$  = 20.6, 10.0 Hz), 127.8 (dd,  $J$  = 27.3, 9.4 Hz), 127.4, 118.9 (d,  $J$  = 4.1 Hz), 9.5 (d,  $J$  = 36.3 Hz).

**$^{11}\text{B}$  NMR (160 MHz, Chloroform-*d*)**  $\delta$  -26.72, -40.49.

**$^{31}\text{P}$  NMR (202 MHz, Chloroform-*d*)**  $\delta$  26.75, 7.38.

**HRMS (ESI):** calc'd for (M-H) $^-$   $\text{C}_{32}\text{H}_{32}\text{B}_2\text{BrP}_2$  579.1354, found 579.1351.

**HPLC analysis:** DAICEL CHIRALCEL AD-H, hexane/isopropanol = 90/10, 1 mL/min,  $\lambda$  = 254 nm,  $t_R$  (major) = 13.199 min,  $t_R$  (minor) = 9.667 min, 94% ee.

**$[\alpha]_D^{25}$ :** -46.4 ( $c$  0.5,  $\text{CHCl}_3$ ).

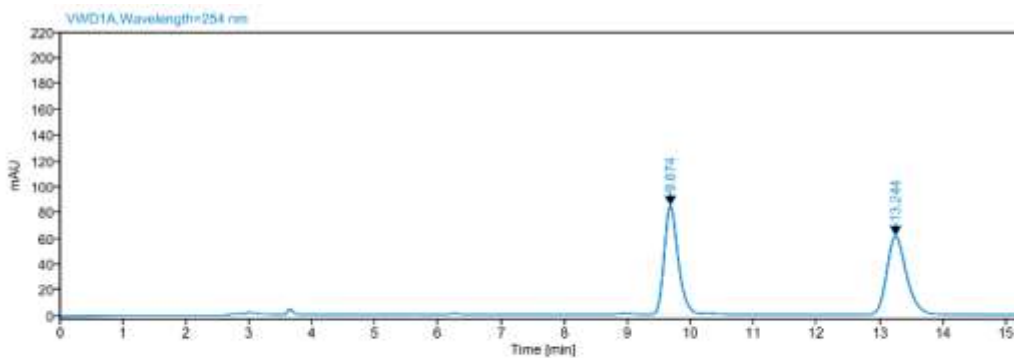

Signal: VWD1A, Wavelength=254 nm

| RT [min] | Type       | Width [min] | Area           | Height | Area% | Name |
|----------|------------|-------------|----------------|--------|-------|------|
| 9.674    | BV         | 0.86        | 1296.34        | 84.14  | 49.52 |      |
| 13.244   | BB         | 2.31        | 1321.61        | 60.71  | 50.48 |      |
|          | <b>Sum</b> |             | <b>2617.95</b> |        |       |      |

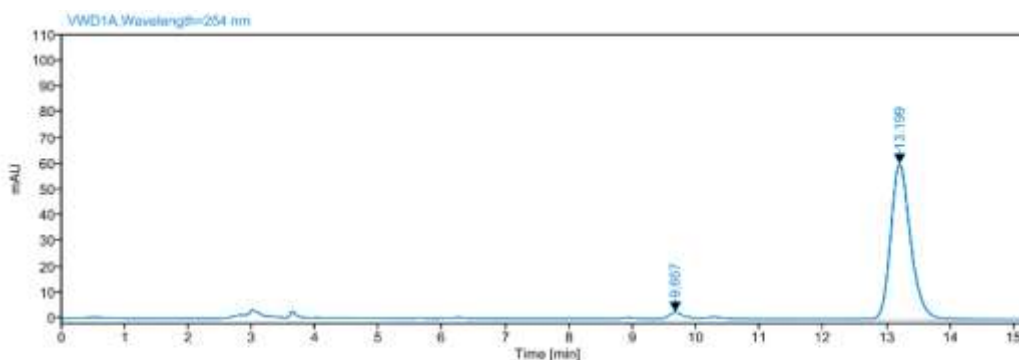

Signal: VWD1A, Wavelength=254 nm

| RT [min] | Type       | Width [min] | Area           | Height | Area% | Name |
|----------|------------|-------------|----------------|--------|-------|------|
| 9.667    | BM m       | 0.68        | 40.37          | 2.49   | 3.02  |      |
| 13.199   | BB         | 1.94        | 1295.13        | 60.12  | 96.98 |      |
|          | <b>Sum</b> |             | <b>1335.50</b> |        |       |      |

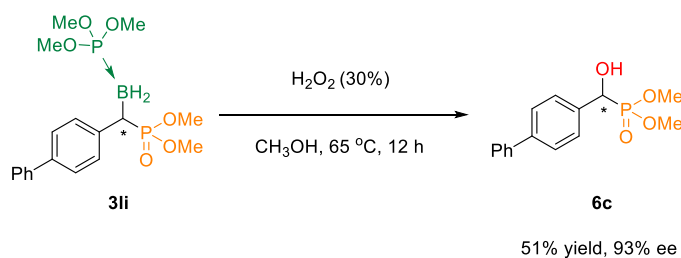

### (R)-dimethyl(1,1'-biphenyl-4-yl(hydroxy)methyl)phosphonate (**6c**)

Under argon, to a solution of **3li** (41.2 mg, 0.10 mmol, 1.0 equiv) in 0.50 mL MeOH, 0.25 mL 30% H<sub>2</sub>O<sub>2</sub> was added one portion. The resulting mixture was heated to 65 °C for 12 h. After cooling to room temperature. The aqueous layer was extracted with EtOAc (3 x 5 mL). The combined organic extract was washed with brine, then dried over anhydrous Na<sub>2</sub>SO<sub>4</sub>, filtered, and concentrated

to give crude product. The crude product was purified by silica gel column chromatography to afford **6c** as a white solid (14.8 mg, 51% yield, 93% ee).<sup>12</sup>

**mp** = 120.1 – 121.8 °C

**R<sub>f</sub>** = 0.22 (silica gel, EtOAc:PE = 1:1)

**<sup>1</sup>H NMR (400 MHz, Chloroform-*d*)** δ 7.66 – 7.53 (m, 6H), 7.44 (t, *J* = 7.5 Hz, 2H), 7.35 (t, *J* = 7.3 Hz, 1H), 5.11 (d, *J* = 11.0 Hz, 1H), 3.79 – 3.60 (m, 7H).

**<sup>13</sup>C NMR (101 MHz, Chloroform-*d*)** δ 141.2, 140.5, 135.1 (d, *J* = 2.6 Hz), 128.8, 127.5, 127.4, 127.2 (d, *J* = 2.5 Hz), 127.1, 70.5 (d, *J* = 159.4 Hz), 53.8 (dd, *J* = 12.8, 7.3 Hz).

**<sup>31</sup>P NMR (162 MHz, Chloroform-*d*)** δ 23.41.

**HRMS (ESI):** calc'd for (M+H)<sup>+</sup> C<sub>15</sub>H<sub>18</sub>O<sub>4</sub>P<sup>+</sup> 293.0937, found 293.0933.

**HPLC analysis:** DAICEL CHIRALCEL AD-H, hexane/isopropanol = 85/15, 1 mL/min, λ = 254 nm, t<sub>R</sub> (major) = 8.237 min, t<sub>R</sub> (minor) = 7.704 min, 93% ee.

**[α]<sub>D</sub><sup>25</sup>:** +16.8 (c 0.5, CHCl<sub>3</sub>).

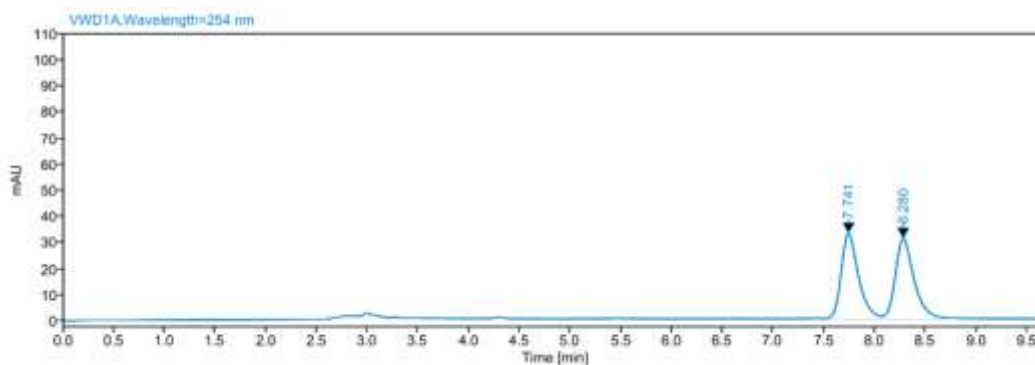

Signal: VWD1A,Wavelength=254 nm

| RT [min] | Type | Width [min] | Area          | Height | Area% | Name |
|----------|------|-------------|---------------|--------|-------|------|
| 7.741    | BV   | 0.85        | 385.33        | 32.70  | 49.32 |      |
| 8.280    | VB   | 1.52        | 395.90        | 30.68  | 50.68 |      |
|          |      | <b>Sum</b>  | <b>781.23</b> |        |       |      |

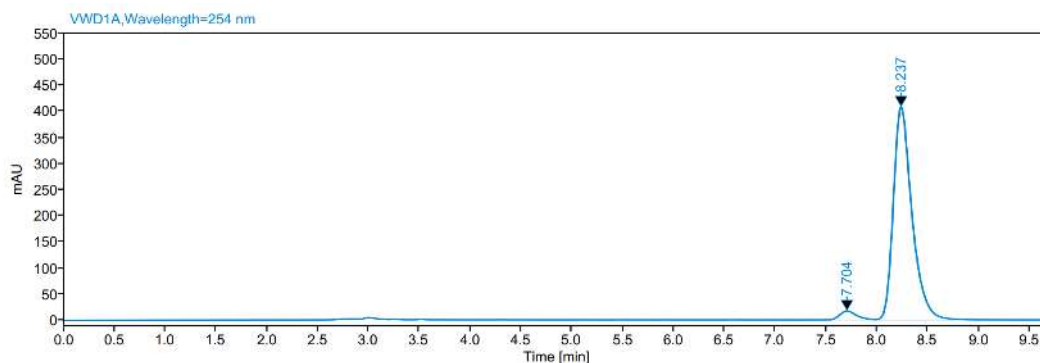

Signal: VWD1A,Wavelength=254 nm

| RT [min] | Type | Width [min] | Area    | Height | Area% | Name |
|----------|------|-------------|---------|--------|-------|------|
| 7.704    | MM m | 0.56        | 199.12  | 17.19  | 3.68  |      |
| 8.237    | MB m | 2.01        | 5216.70 | 408.34 | 96.32 |      |
| Sum      |      |             | 5415.82 |        |       |      |

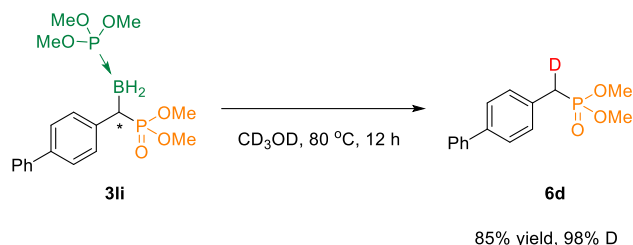

### dimethyl ([1,1'-biphenyl]-4-ylmethyl-d)phosphonate(6d)

Under agron, to a solution of **3li** (41.2 mg, 0.1 mmol, 1.0 equiv) in 1 mL CD<sub>3</sub>OD, the resulting mixture was heated to 80 °C for 12 h. After cooling to room temperature, concentrated to give crude product. The crude product was purified by silica gel column chromatography to afford **6d** as a white solid (23.6 mg, 85% yield, 98% D).

mp = 65.6 – 66.9 °C

R<sub>f</sub> = 0.30 (silica gel, EtOAc:PE = 1:1)

<sup>1</sup>H NMR (400 MHz, Chloroform-*d*) δ 7.61 – 7.53 (m, 4H), 7.43 (t, *J* = 7.6 Hz, 2H), 7.39 – 7.31 (m, 3H), 3.70 (d, *J* = 10.8 Hz, 6H), 3.20 (d, *J* = 21.7 Hz, 1H).

<sup>13</sup>C NMR (101 MHz, Chloroform-*d*) δ 140.6 (d, *J* = 1.6 Hz), 139.9 (d, *J* = 3.9 Hz), 130.2 (d, *J* = 9.4 Hz), 130.1 (d, *J* = 6.6 Hz), 128.7, 127.3 (d, *J* = 3.1 Hz), 127.3, 127.0, 52.9 (d, *J* = 6.9 Hz).

<sup>31</sup>P NMR (162 MHz, Chloroform-*d*) δ 28.86.

HRMS (ESI): calc'd for (M+H)<sup>+</sup> C<sub>15</sub>H<sub>17</sub>DO<sub>3</sub>P<sup>+</sup> 278.1051, found 278.1051.

## 1.6 Mechanism Study of the B-H bond insertion reaction

### (A) Deuterium labeling experiment

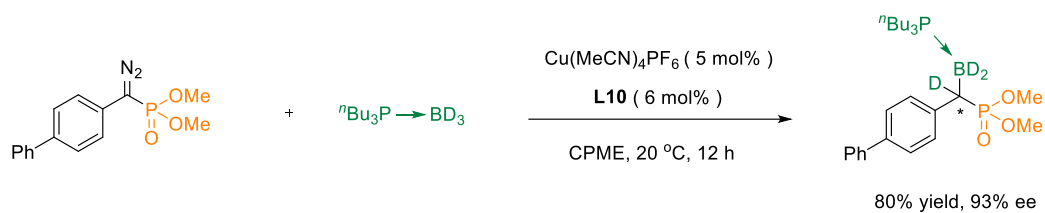

In air, a 25 mL schlenk tube was charged with  $\text{Cu}(\text{MeCN})_4\text{PF}_6$  (5 mol%), **L10** (6 mol%). The tube was evacuated and filled with argon for three cycles. Then, 2 mL of CPME, dimethyl ([1,1'-biphenyl]-4-yl(diazo)methyl)phosphonate (0.20 mmol, 1.0 equiv) and tributylphosphane borane-*d*<sub>3</sub> (0.4 mmol, 2.0 equiv) was added under argon. The reaction was allowed to stir at 20 °C for 12 hours. Upon completion, proper amount of silica gel was added to the reaction mixture. After removal of the solvent, the crude reaction mixture was purified on silica gel (petroleum ether and ethyl acetate) to afford the desired products as a colorless oil in 80% yield (78.6 mg) with 93% ee.

#### (B) Procedure for One-Pot competition KIE experiment

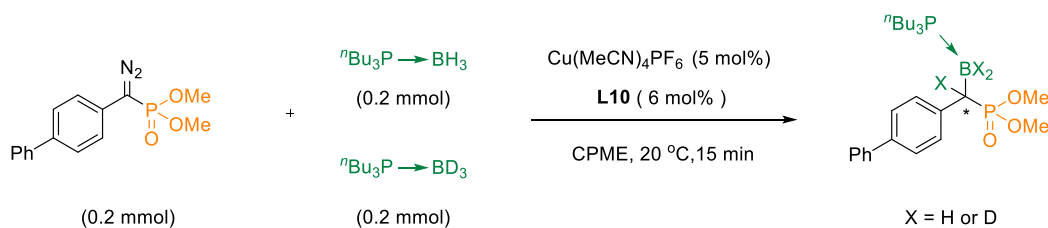

In air, a 25 mL schlenk tube was charged with  $\text{Cu}(\text{MeCN})_4\text{PF}_6$  (5 mol%), **L10** (6 mol%). The tube was evacuated and filled with argon for three cycles. Then, 2 mL of CPME, dimethyl ([1,1'-biphenyl]-4-yl(diazo)methyl)phosphonate (0.20 mmol, 1.0 equiv), tributylphosphane borane (0.20 mmol, 1.0 equiv) and tributylphosphane borane-*d*<sub>3</sub> (0.20 mmol, 1.0 equiv) was added under argon. The reaction was allowed to stir at 20 °C for 15 minutes. Upon completion, proper amount of silica gel was added to the reaction mixture. After removal of the solvent, the crude reaction mixture was purified on silica gel (petroleum ether and ethyl acetate) to afford **31h** and **31h-*d*<sub>3</sub>** as the mixture of colorless oil (50.1 mg). KIE was determined by <sup>1</sup>H NMR.



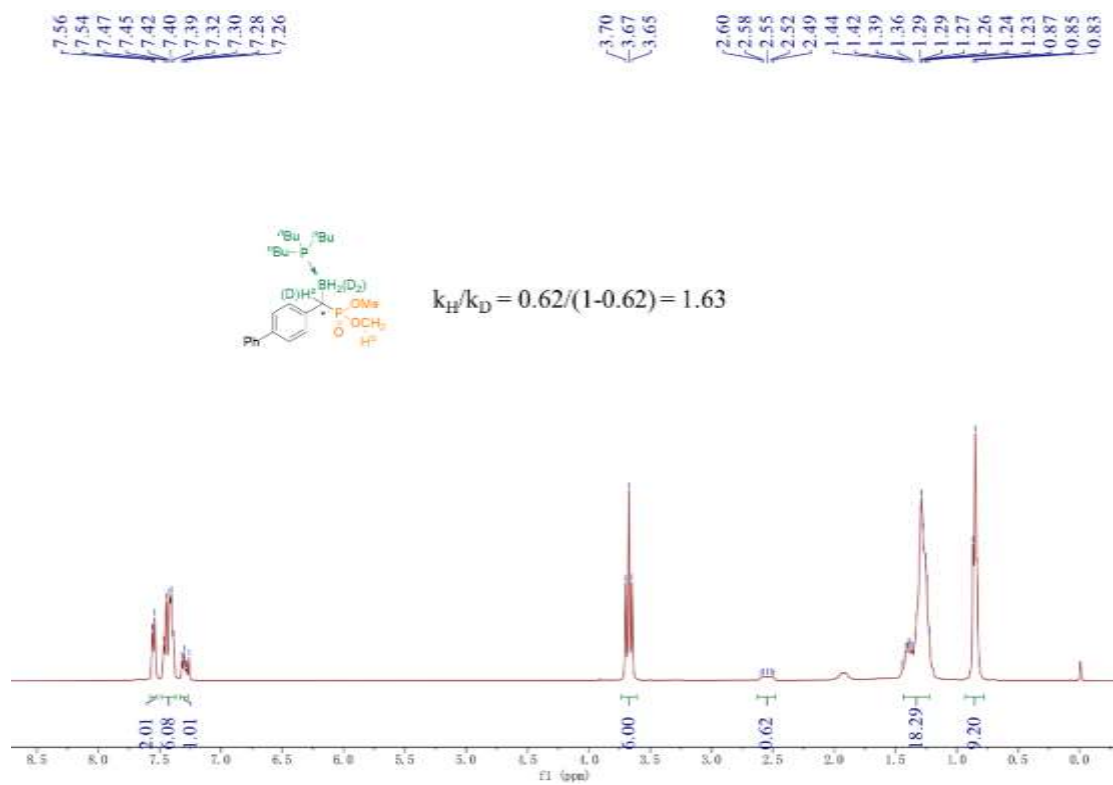

### 1.7 Crystal structure of compound **3aa**

For **3aa**: the data was collected by using molybdenum (Mo) irradiation source at room temperature. The crystal sample of **3aa** was recrystallized from a mixture of DCM and PE.

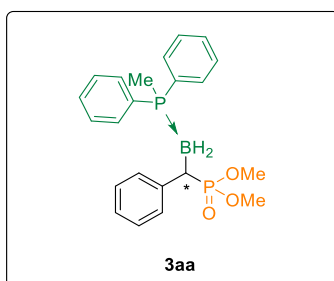

CCDC 2312601

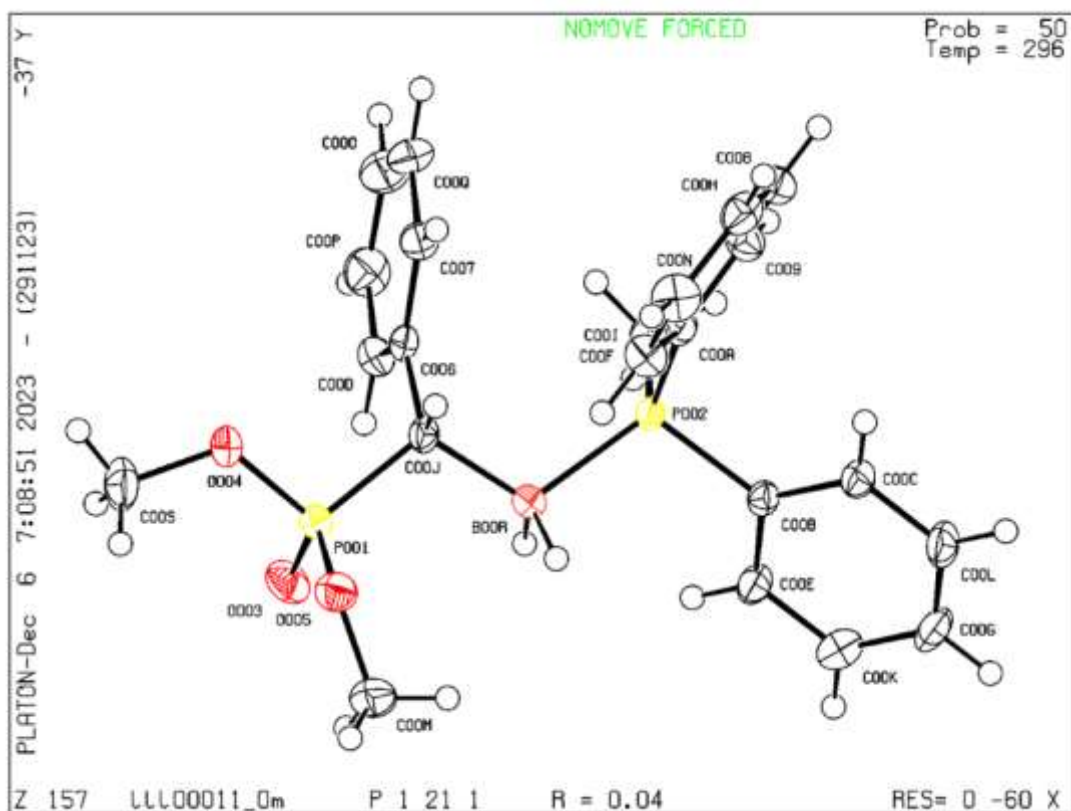

**Table 1 Crystal data and structure refinement for LLL00011\_0m.**

|                                    |                                                                |
|------------------------------------|----------------------------------------------------------------|
| Identification code                | LLL00011_0m                                                    |
| Empirical formula                  | C <sub>22</sub> H <sub>27</sub> BO <sub>3</sub> P <sub>2</sub> |
| Formula weight                     | 412.18                                                         |
| Temperature/K                      | 296.15                                                         |
| Crystal system                     | monoclinic                                                     |
| Space group                        | P2 <sub>1</sub>                                                |
| a/Å                                | 10.778(2)                                                      |
| b/Å                                | 9.8031(17)                                                     |
| c/Å                                | 11.594(3)                                                      |
| α/°                                | 90                                                             |
| β/°                                | 117.183(7)                                                     |
| γ/°                                | 90                                                             |
| Volume/Å <sup>3</sup>              | 1089.8(4)                                                      |
| Z                                  | 2                                                              |
| ρ <sub>calc</sub> /cm <sup>3</sup> | 1.256                                                          |
| μ/mm <sup>-1</sup>                 | 0.219                                                          |
| F(000)                             | 436.0                                                          |

|                                             |                                                               |
|---------------------------------------------|---------------------------------------------------------------|
| Crystal size/mm <sup>3</sup>                | 0.15 × 0.12 × 0.014                                           |
| Radiation                                   | MoK $\alpha$ ( $\lambda$ = 0.71073)                           |
| 2 $\Theta$ range for data collection/°      | 3.95 to 63.78                                                 |
| Index ranges                                | -13 ≤ h ≤ 15, -14 ≤ k ≤ 12, -15 ≤ l ≤ 16                      |
| Reflections collected                       | 20561                                                         |
| Independent reflections                     | 5636 [R <sub>int</sub> = 0.0487, R <sub>sigma</sub> = 0.0560] |
| Data/restraints/parameters                  | 5636/1/264                                                    |
| Goodness-of-fit on F <sup>2</sup>           | 1.072                                                         |
| Final R indexes [I ≥ 2 $\sigma$ (I)]        | R <sub>1</sub> = 0.0358, wR <sub>2</sub> = 0.0809             |
| Final R indexes [all data]                  | R <sub>1</sub> = 0.0572, wR <sub>2</sub> = 0.1021             |
| Largest diff. peak/hole / e Å <sup>-3</sup> | 0.34/-0.41                                                    |
| Flack parameter                             | -0.01(3)                                                      |

## 2. References

- (1) Ye, F.; Wang, C.; Zhang, Y.; Wang, J. *Angew. Chem. Int. Ed.* **2014**, *53*, 11625-11628.
- (2) Zhou, Y.; Ye, F.; Zhou, Q.; Zhang, Y.; Wang, J. *Org. Lett.* **2016**, *18*, 2024-2027.
- (3) Zhou, Y.; Zhang, Y.; Wang, J. *Org. Biomol. Chem.* **2016**, *14*, 10444-10453.
- (4) Sun, S.; Wei, Y.; Xu, J. *Org. Lett.* **2022**, *24*, 6024-6030.
- (5) Busacca, C. A.; Raju, R.; Grinberg, N.; Haddad, N.; James-Jones, P.; Lee, H.; Lorenz, J. C.; Saha, A.; Senanayake, C. H. *J. Org. Chem.* **2008**, *73*, 1524-1531.
- (6) Woźnicki, P.; Korzeniowska, E.; Stankevič, M. *J. Org. Chem.* **2017**, *82*, 10271- 10296.
- (7) Wang, C.; Ge, Q.; Xu, C.; Xing, Z.; Xiong, J.; Zheng, Y.; Duan, W. L. *Org. Lett.* **2023**, *25*, 1583-1588.
- (8) Lloyd-Jones, G. C.; Taylor, N. P. *Chem. - Eur. J.* **2015**, *21*, 5423-5428.
- (9) Paul, S.; Roy, S.; Monfregola, L.; Shang, S.; Shoemaker, R.; Caruthers, M. H. *J. Am. Chem. Soc.* **2015**, *137*, 3253-3264.
- (10) Lei, Z.; Zhang, W.; Wu, J. *ACS Catal.* **2023**, *13*, 16105-16113.
- (11) Wei, X.-H.; Bai, C.-Y.; Wang, A.-J.; Feng, Q.-L.; Zhao, L.-B.; Zhang, P.; Li, Z.-H.; Su, Q.; Wang, Y.-B. *Org. Lett.* **2021**, *23*, 7100-7105.
- (12) Pang, Y.; He, Q.; Li, Z. Q.; Yang, J. M.; Yu, J. H.; Zhu, S. F.; Zhou, Q. L. *J. Am. Chem. Soc.* **2018**, *140*, 10663-10668.

### 3. NMR spectra

#### Diethyl ((diazophenyl)methyl)phosphonate (1a)

<sup>1</sup>H NMR (400 MHz, Chloroform-*d*)

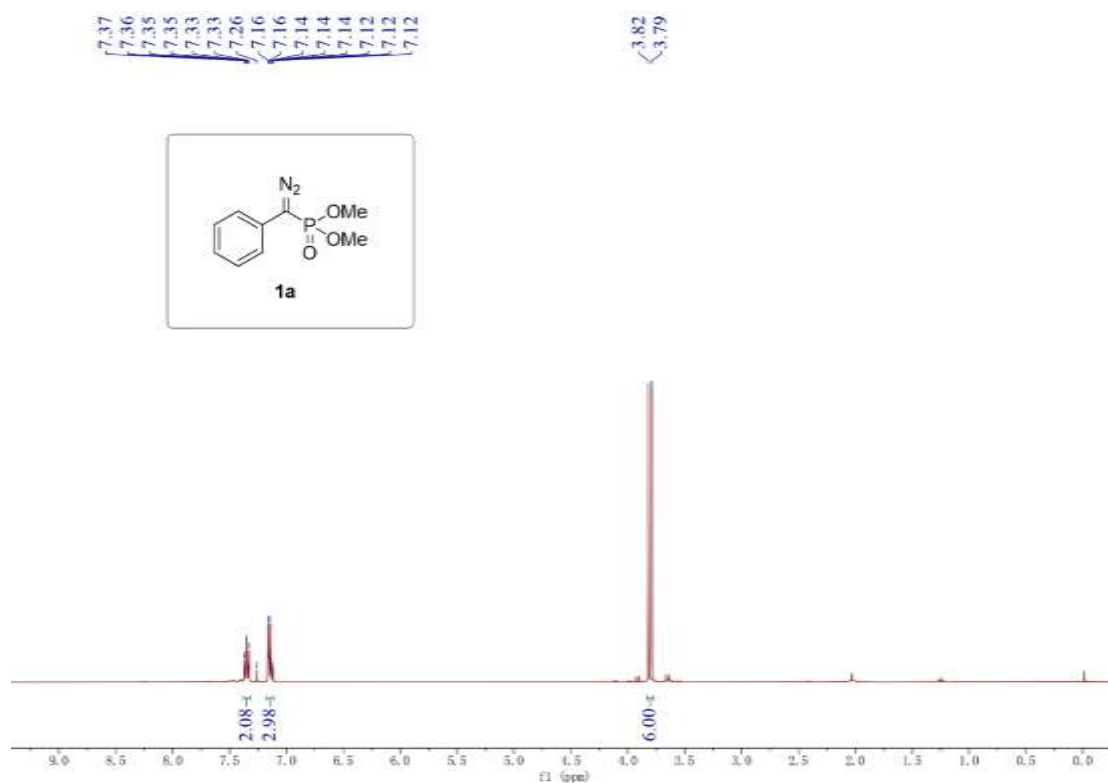

#### Dimethyl ((4-chlorophenyl)(diazomethyl)phosphonate (1b)

<sup>1</sup>H NMR (500 MHz, Chloroform-*d*)

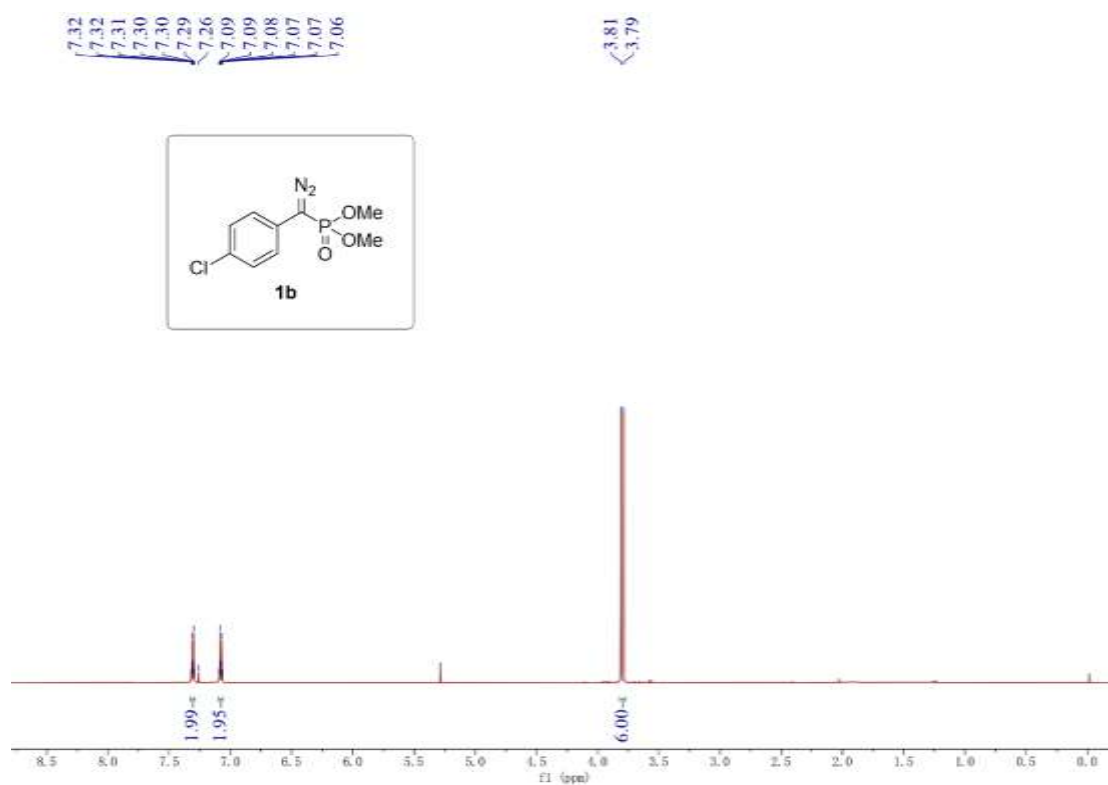

**Dimethyl (diazo(4-(hydroxymethyl)phenyl)methyl)phosphonate (1c)**

**<sup>1</sup>H NMR (500 MHz, Chloroform-*d*)**

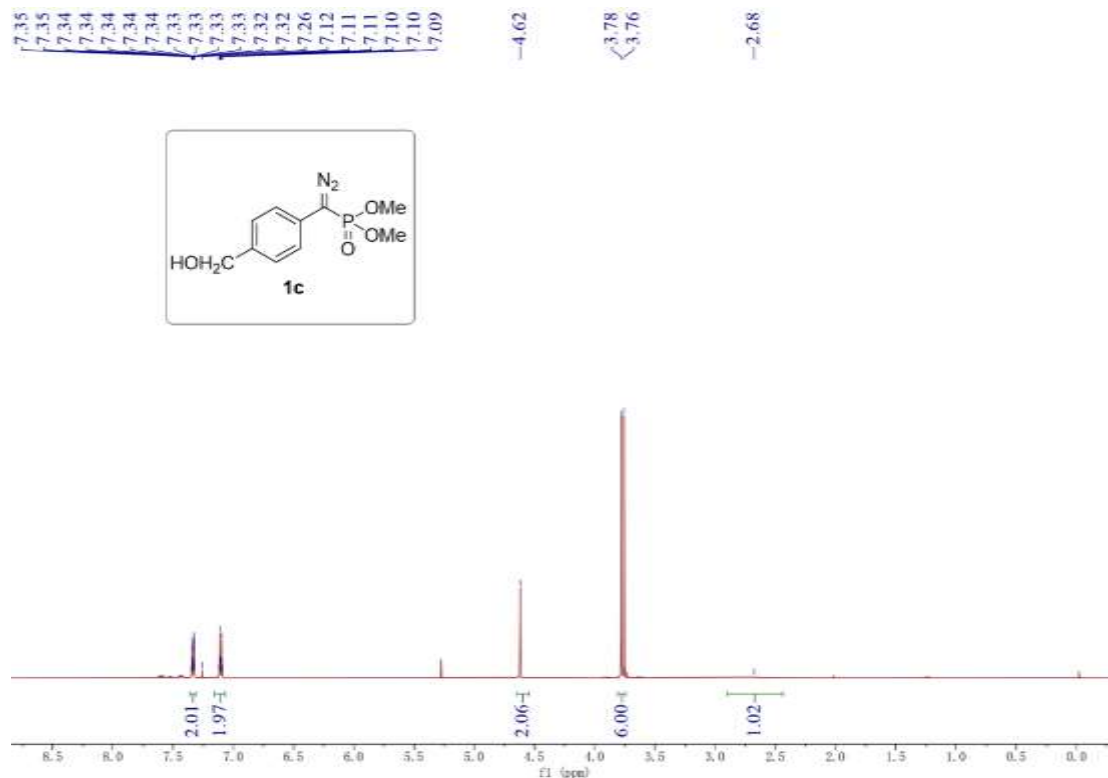

**Dimethyl (diazo(4-methoxyphenyl)methyl)phosphonate (1d)**

**<sup>1</sup>H NMR (500 MHz, Chloroform-*d*)**

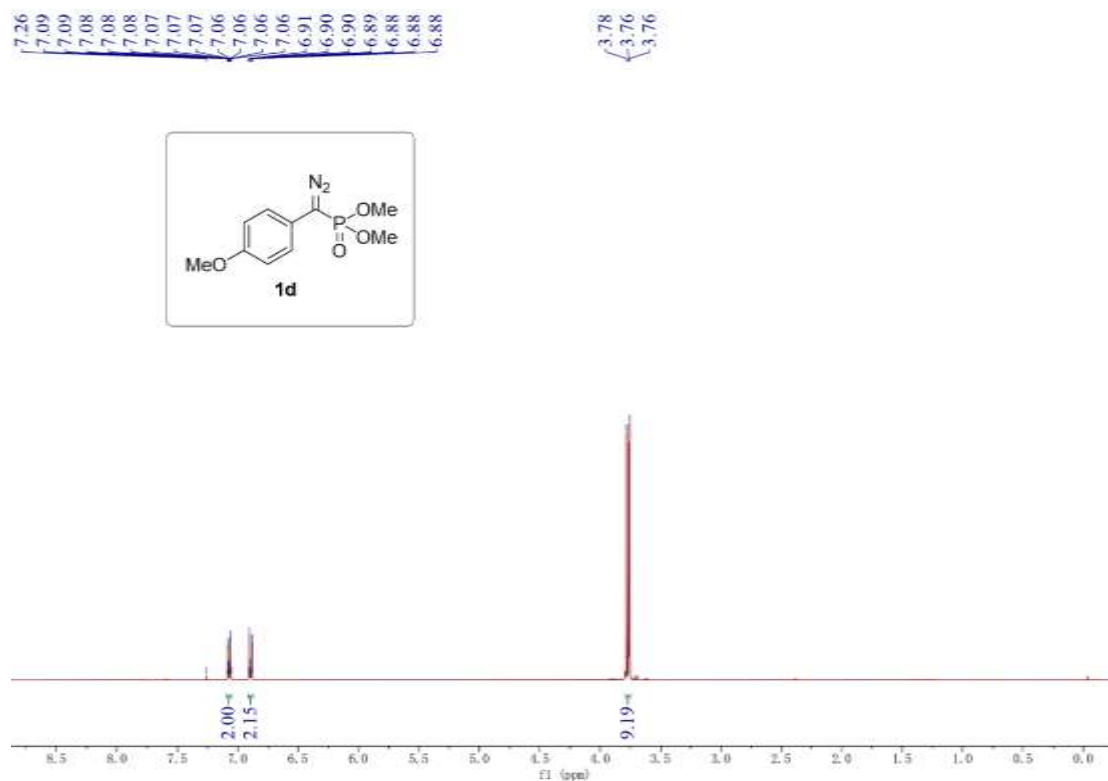

### Dimethyl (diazo(p-tolyl)methyl)phosphonate (1e)

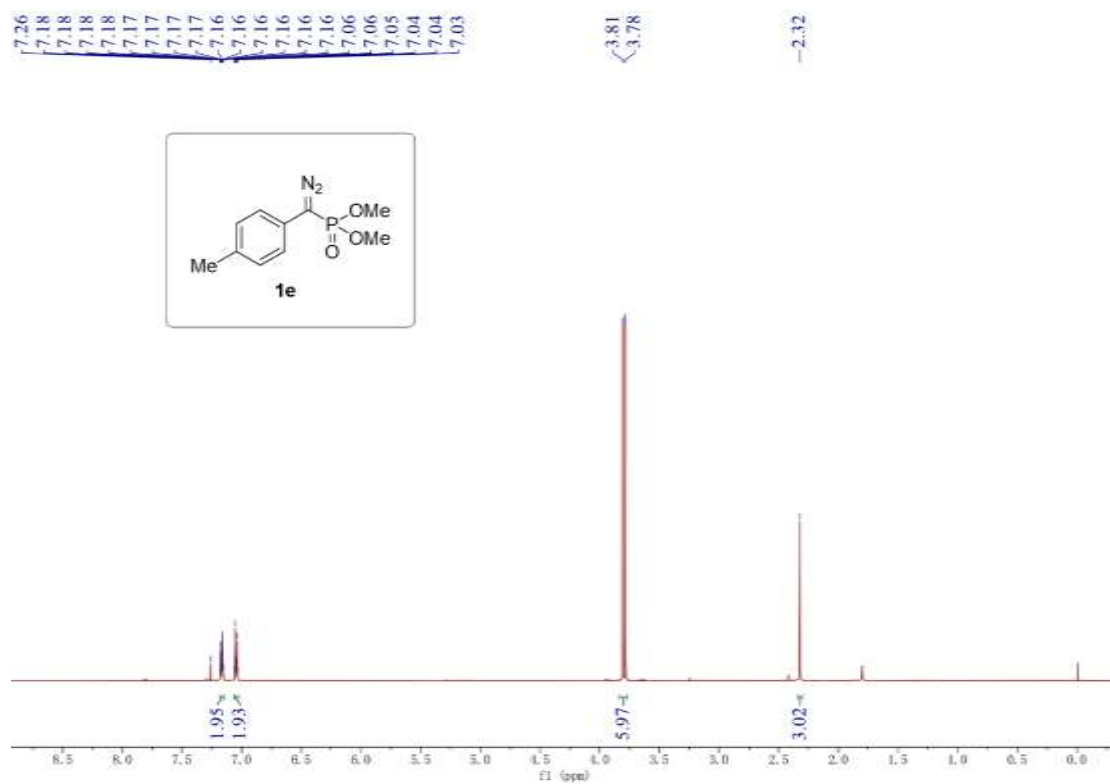

### Dimethyl (diazo(4-(methylthio)phenyl)methyl)phosphonate (1f)

<sup>1</sup>H NMR (500 MHz, Chloroform-*d*)

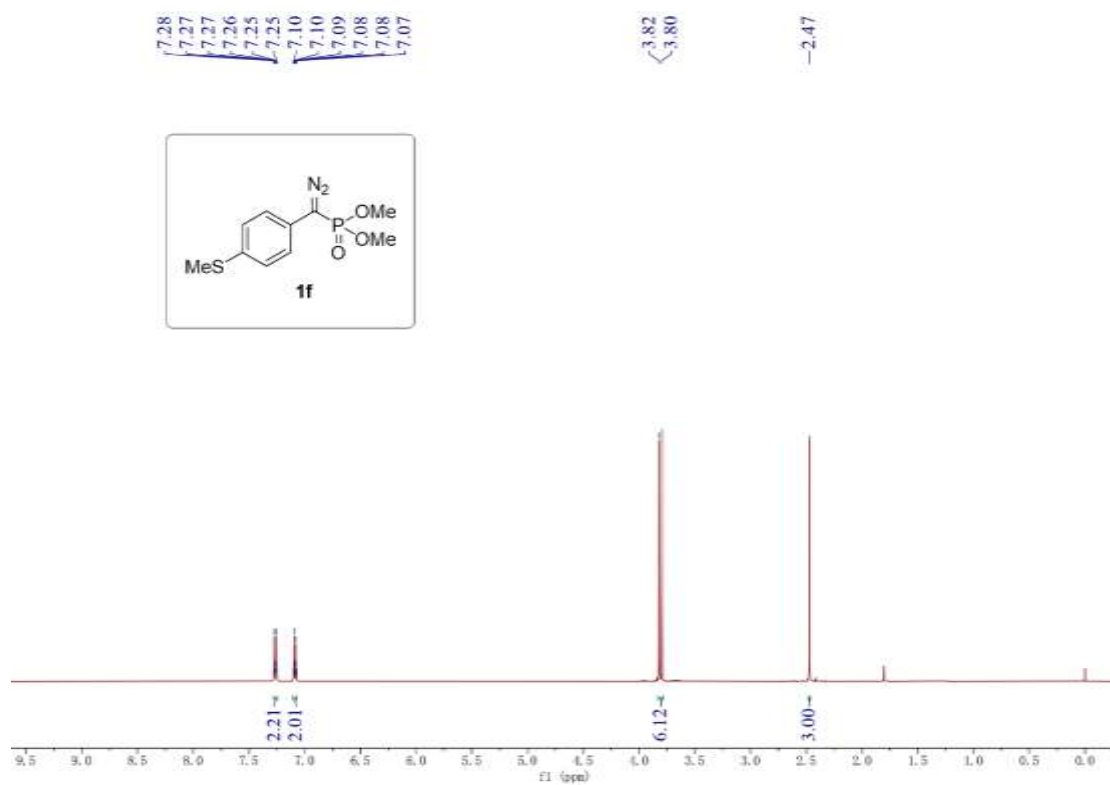

**<sup>13</sup>C NMR (126 MHz, Chloroform-*d*)**

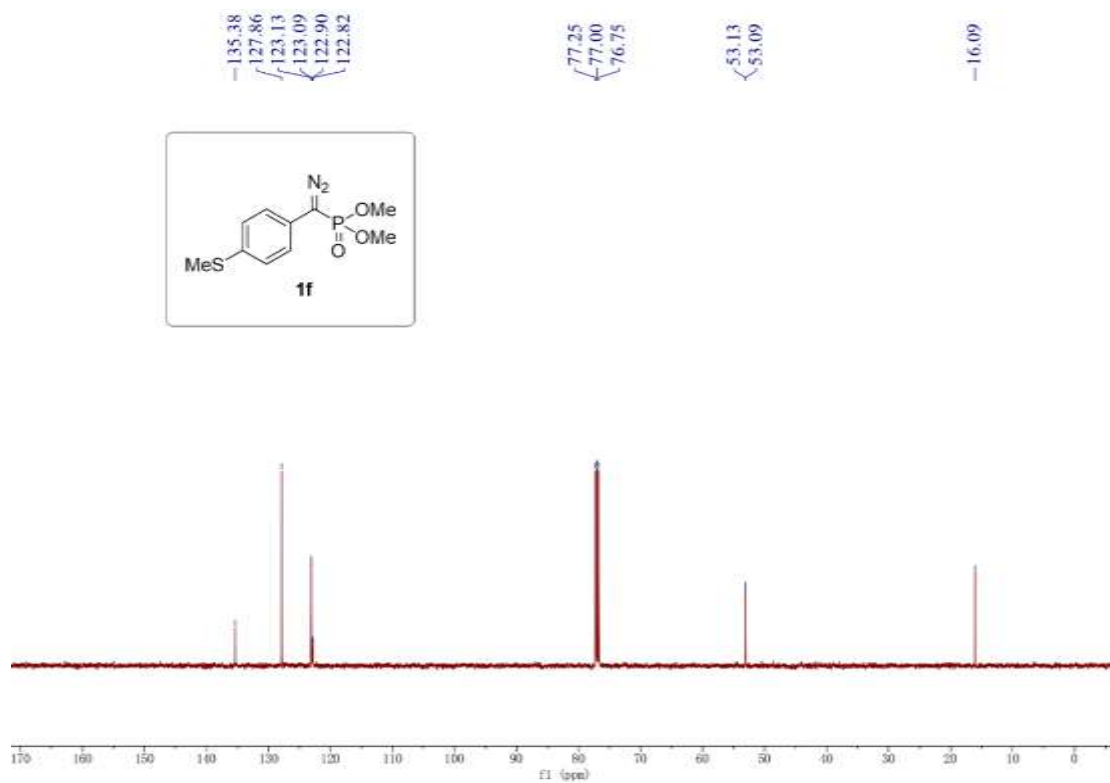

**<sup>31</sup>P NMR (202 MHz, Chloroform-*d*)**

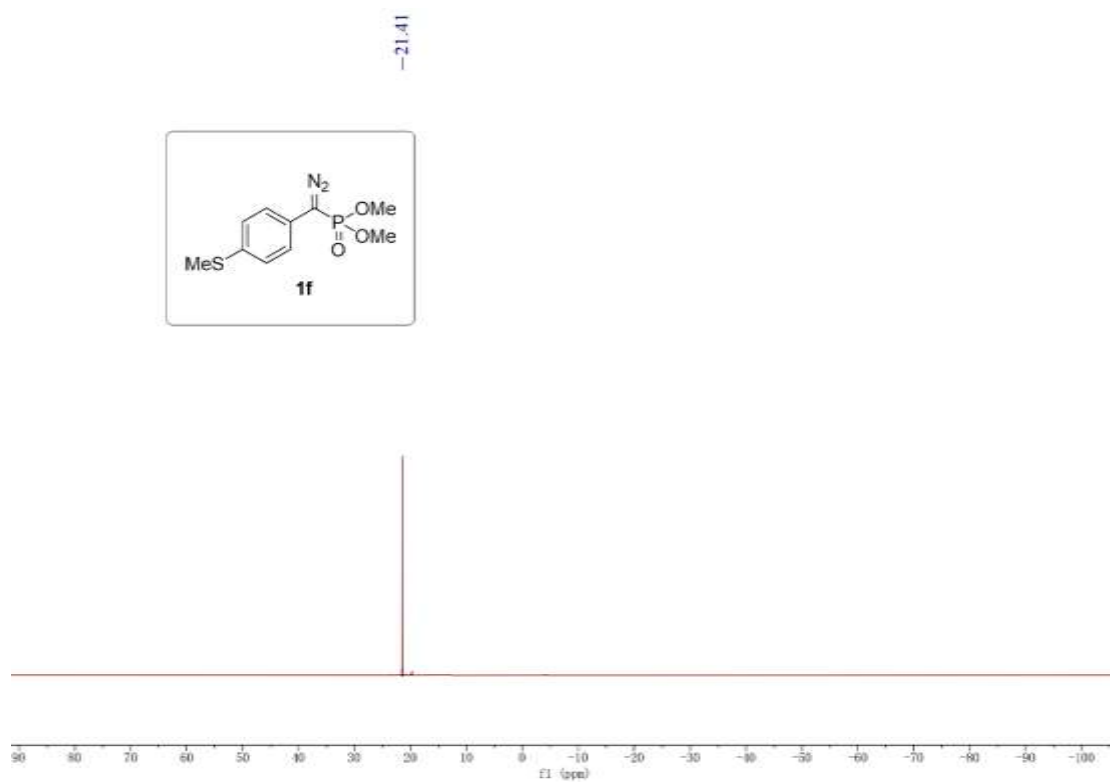

### Dimethyl (diazo(4-nitrophenyl)methyl)phosphonate (**1g**)

<sup>1</sup>H NMR (500 MHz, Chloroform-*d*)

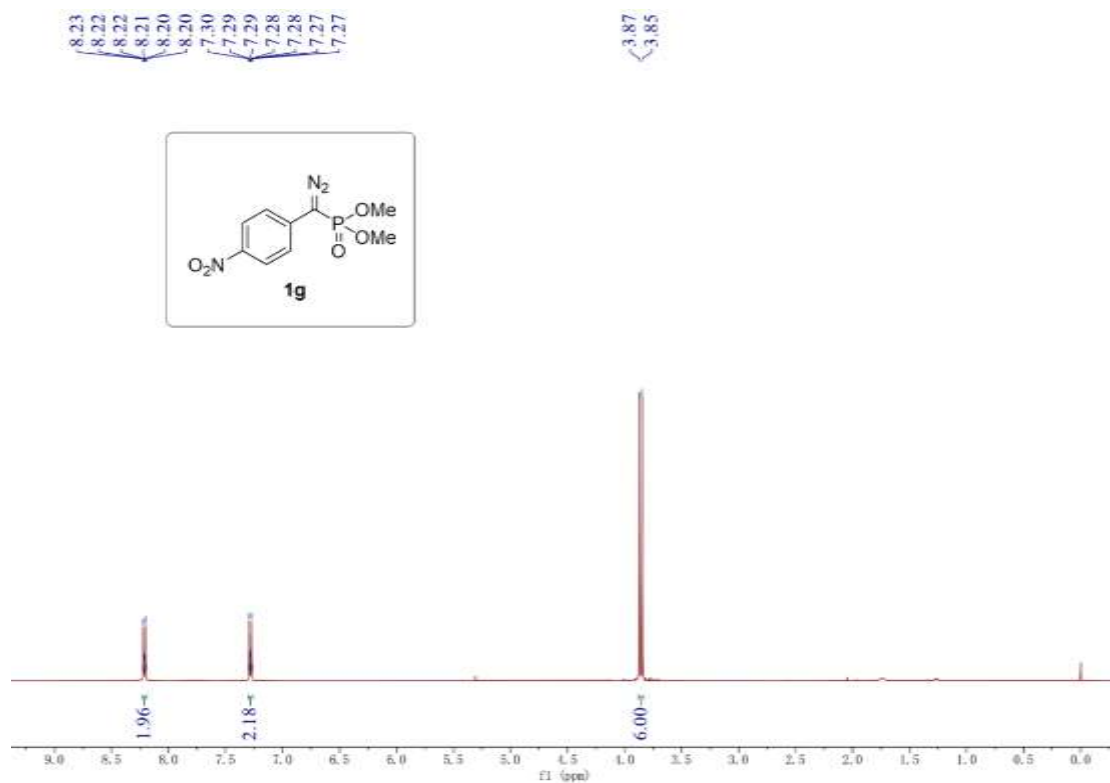

### Methyl-4-(diazo(dimethoxyphosphoryl)methyl)benzoate (**1h**)

<sup>1</sup>H NMR (500 MHz, Chloroform-*d*)

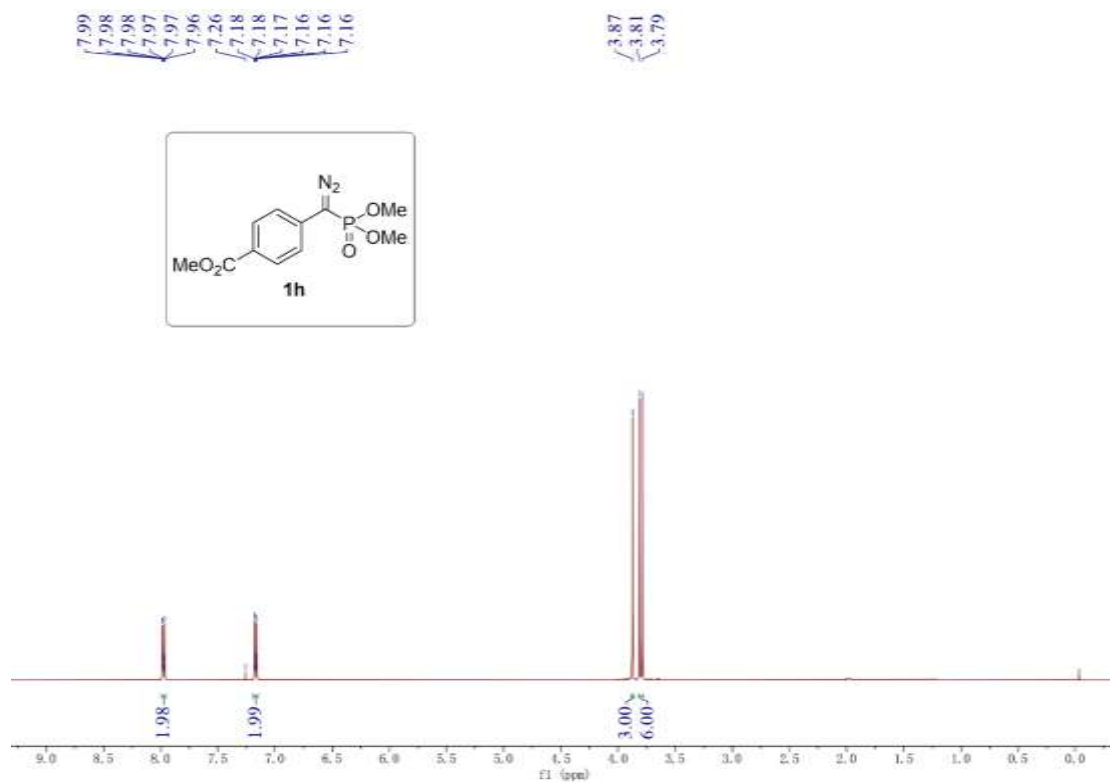



**Dimethyl (diazo(4-fluorophenyl)methyl)phosphonate (1i)**

**<sup>1</sup>H NMR (500 MHz, Chloroform-*d*)**

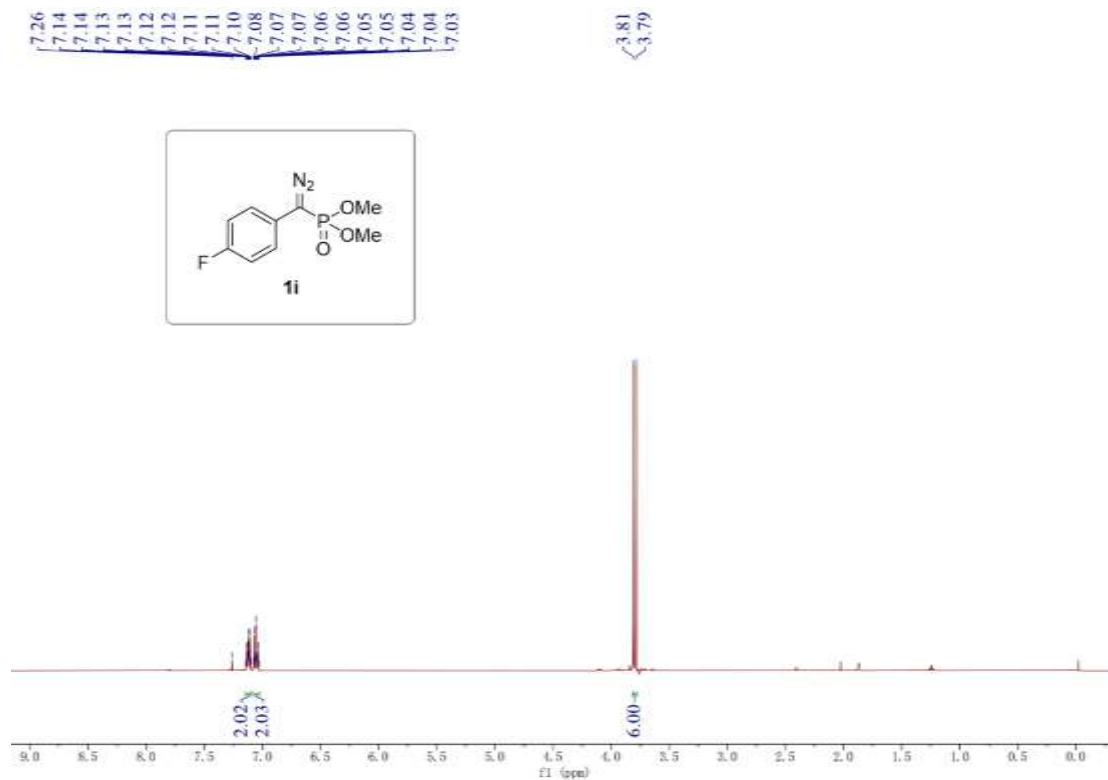

**Dimethyl ((4-bromophenyl)(diazo)methyl)phosphonate (1j)**

**<sup>1</sup>H NMR (500 MHz, Chloroform-*d*)**

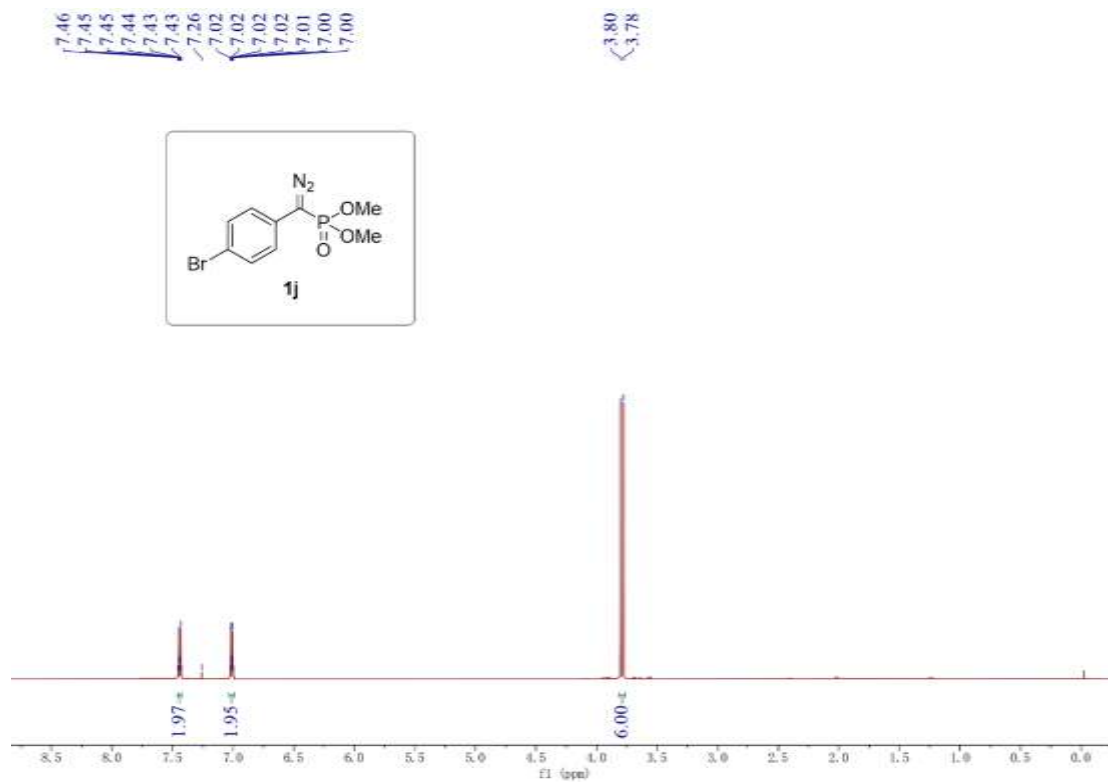

Dimethyl (diazo(4-(trifluoromethyl)phenyl)methyl)phosphonate (**1k**)

<sup>1</sup>H NMR (400 MHz, Chloroform-*d*)

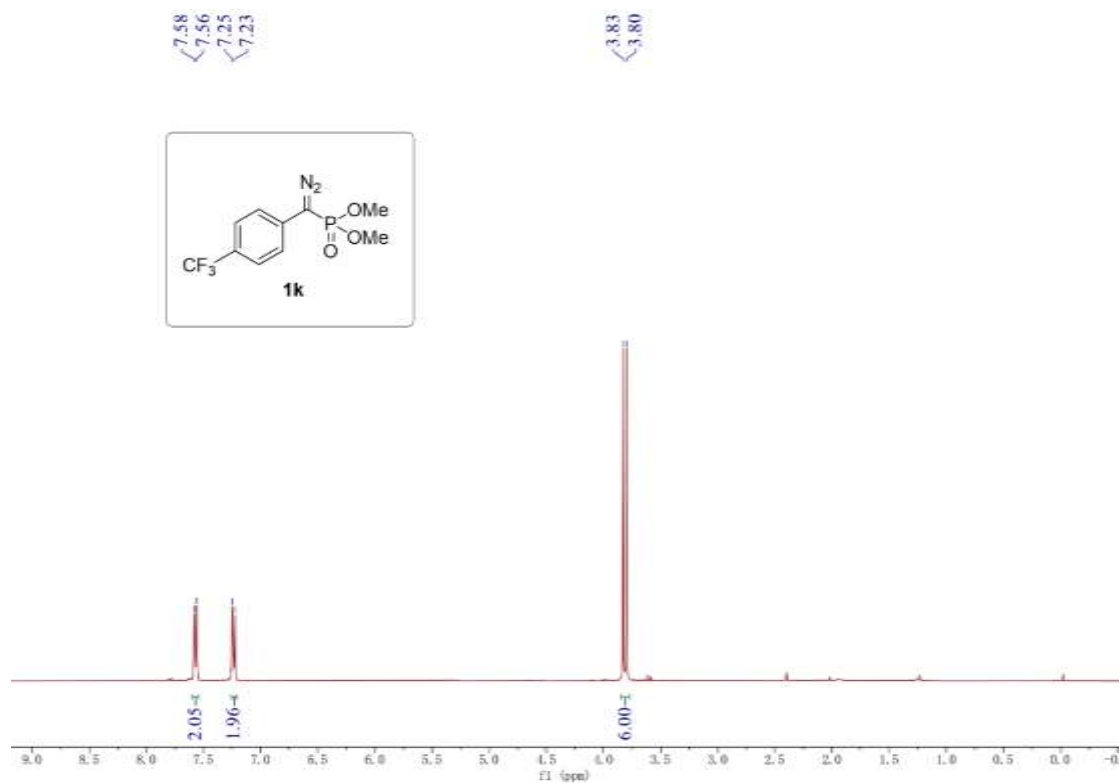

<sup>13</sup>C NMR (101 MHz, Chloroform-*d*)

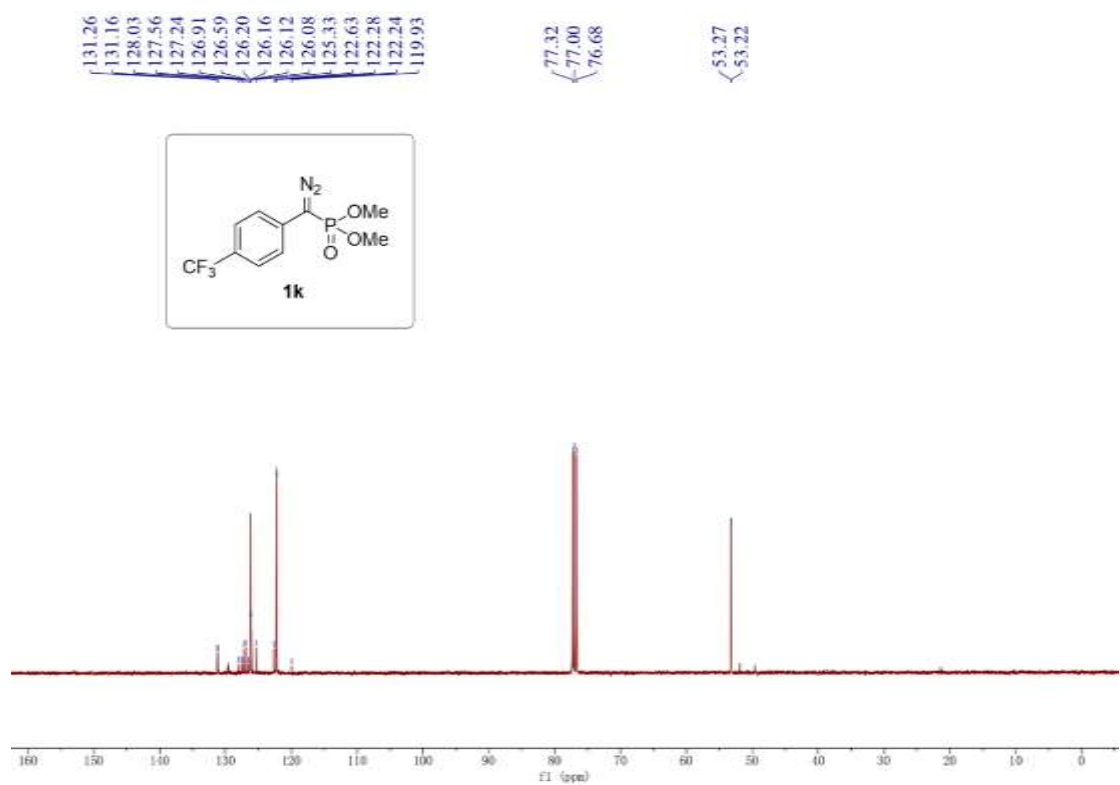

**<sup>31</sup>P NMR (162 MHz, Chloroform-*d*)**

-19.19

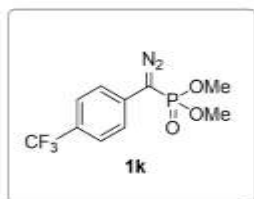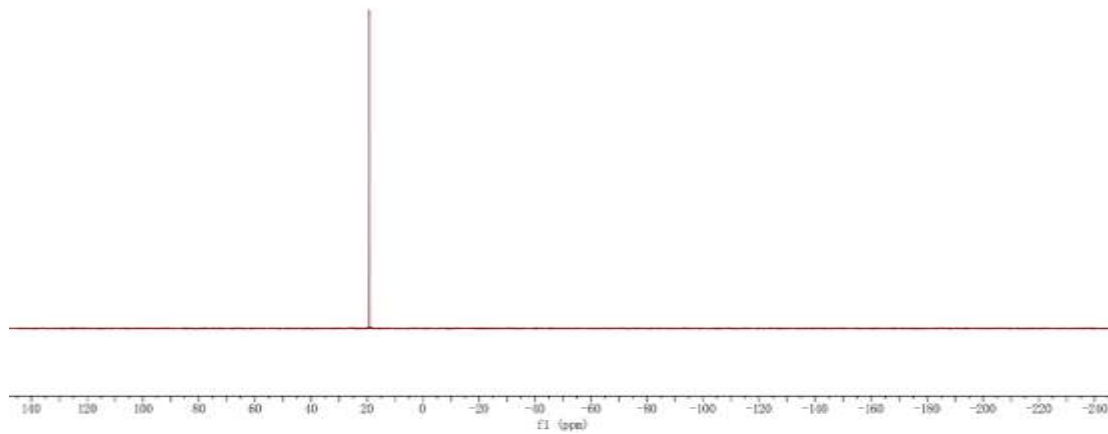

**<sup>19</sup>F NMR (376 MHz, Chloroform-*d*)**

-62.48

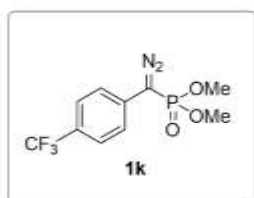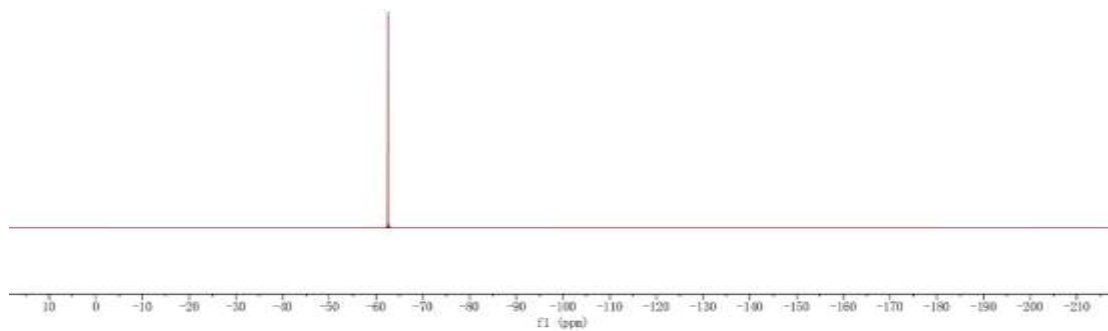

**Dimethyl ([1,1'-biphenyl]-4-yl(diazo)methyl)phosphonate (1l)**

**<sup>1</sup>H NMR (500 MHz, Chloroform-*d*)**

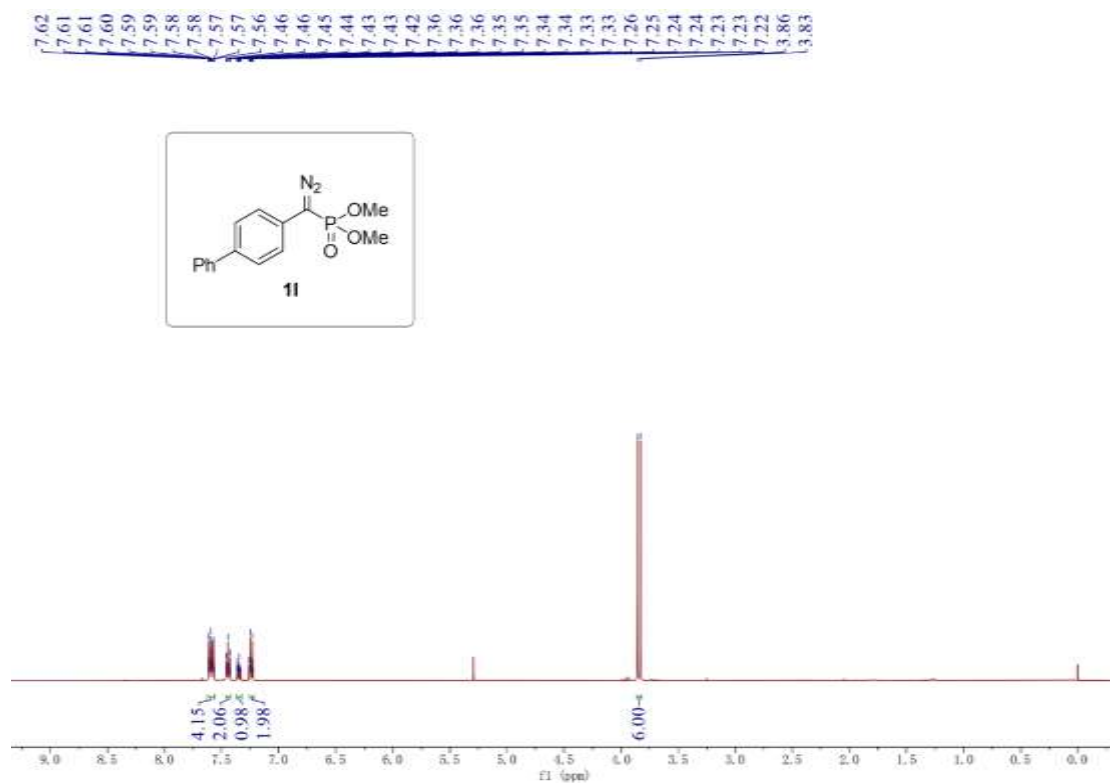

**Dimethyl ((4-(benzyloxy)phenyl)(diazo)methyl)phosphonate (1m)**

**<sup>1</sup>H NMR (400 MHz, Chloroform-*d*)**

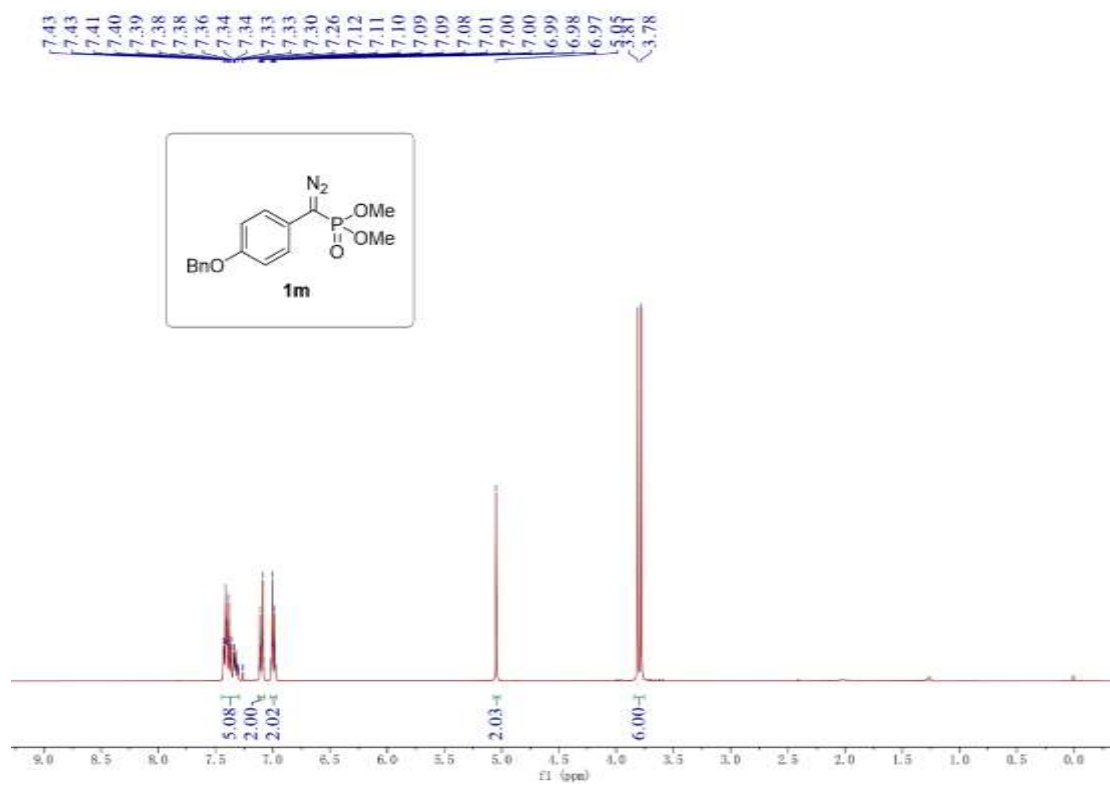

**<sup>13</sup>C NMR (101 MHz, Chloroform-*d*)**

156.81, 136.66, 128.51, 127.93, 127.32, 124.32, 124.28, 117.77, 117.68, 115.97, 77.32, 77.00, 76.68, 70.05, 53.01, 52.96

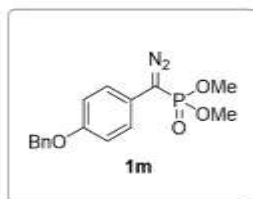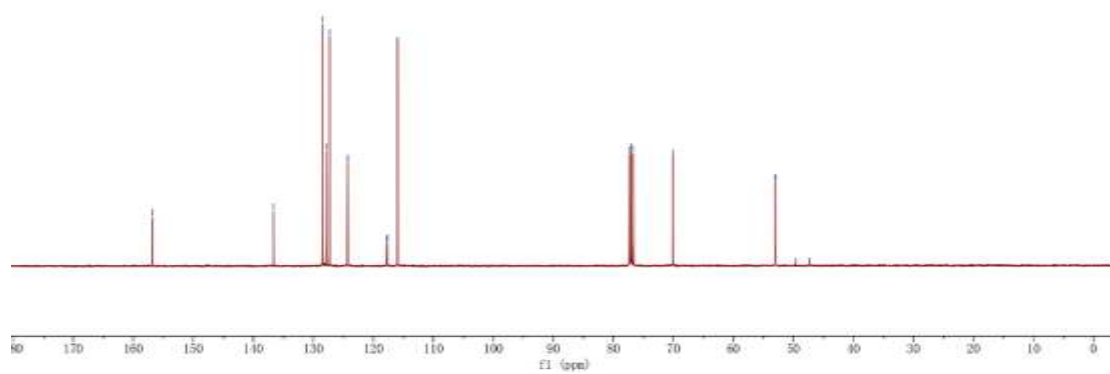

**<sup>31</sup>P NMR (162 MHz, Chloroform-*d*)**

21.57

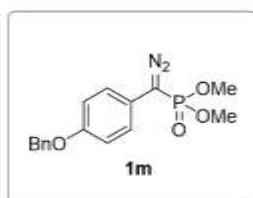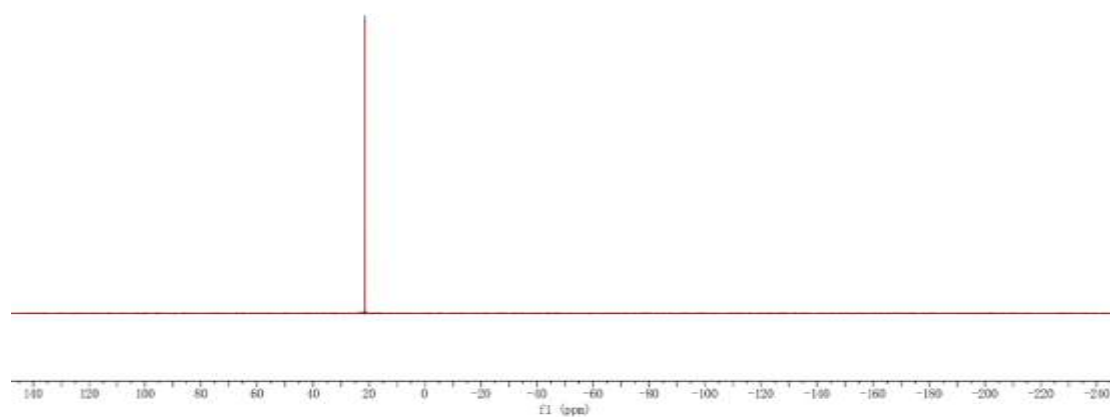

**Dimethyl ((4-cyanophenyl)(diazo)methyl)phosphonate (1n)**

**<sup>1</sup>H NMR (500 MHz, Chloroform-*d*)**

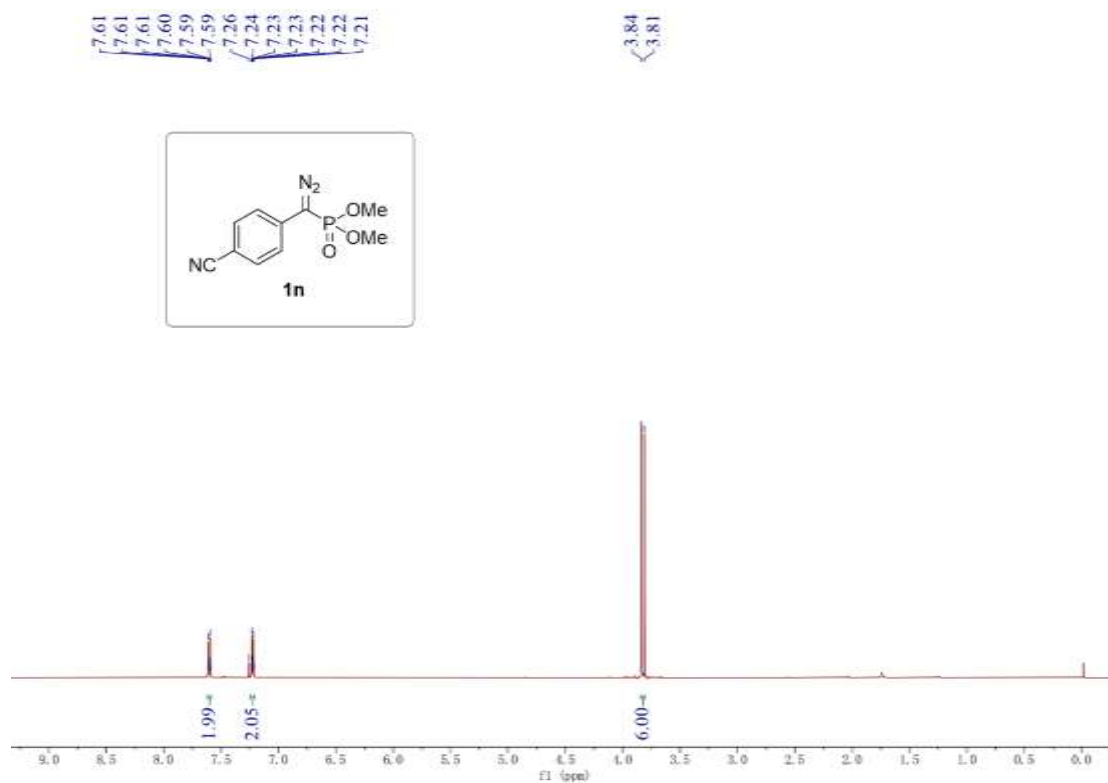

**Dimethyl (diazo(3-methoxyphenyl)methyl)phosphonate (1o)**

**<sup>1</sup>H NMR (500 MHz, Chloroform-*d*)**

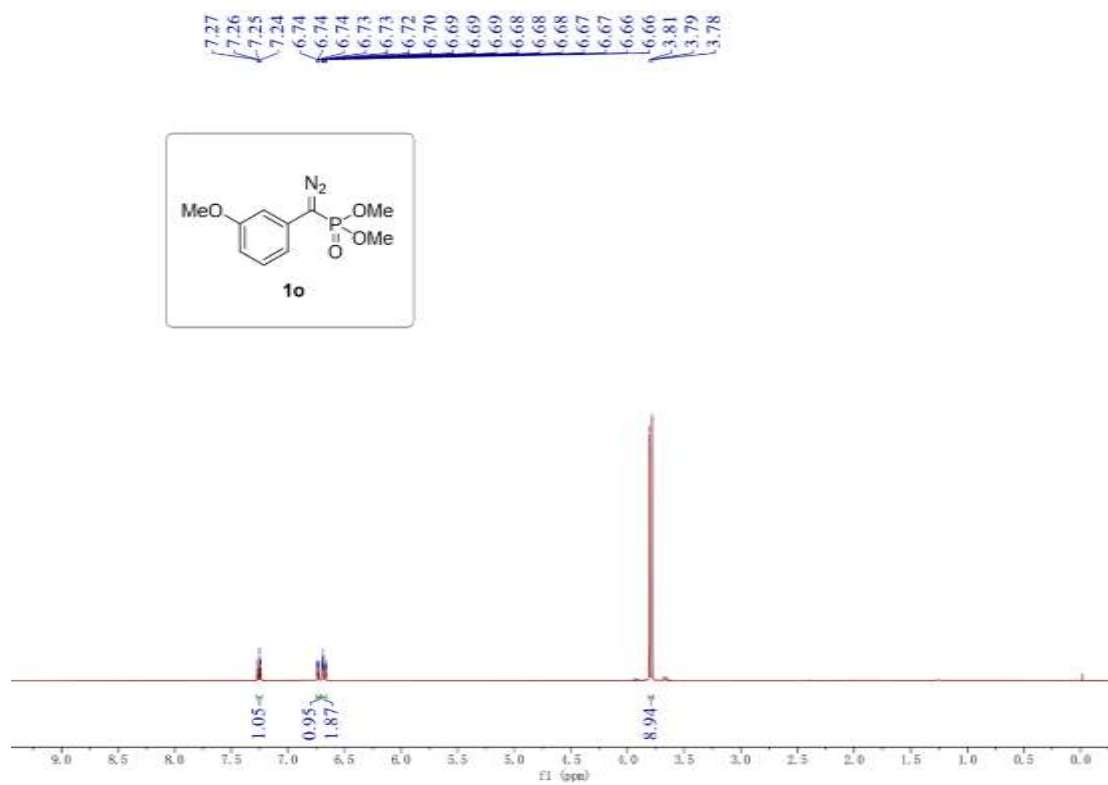

### Methyl 3-(diazo(dimethoxyphosphoryl)methyl)benzoate (1p)

<sup>1</sup>H NMR (500 MHz, Chloroform-*d*)

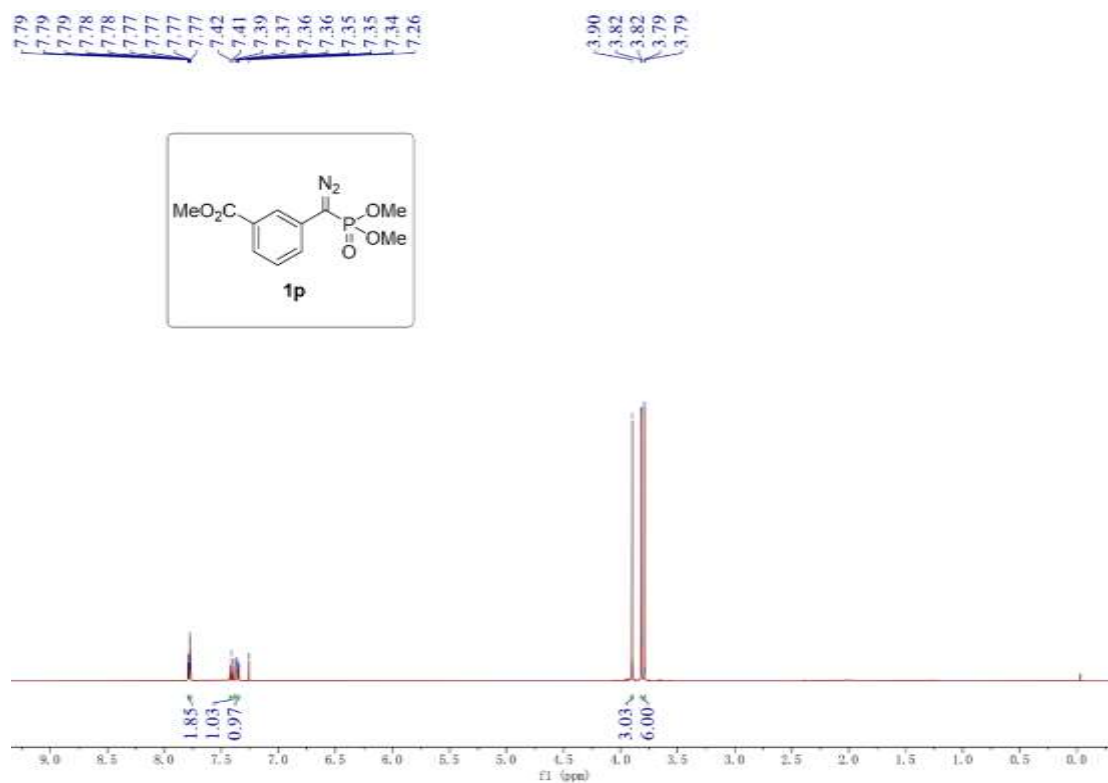

<sup>13</sup>C NMR (101 MHz, Chloroform-*d*)

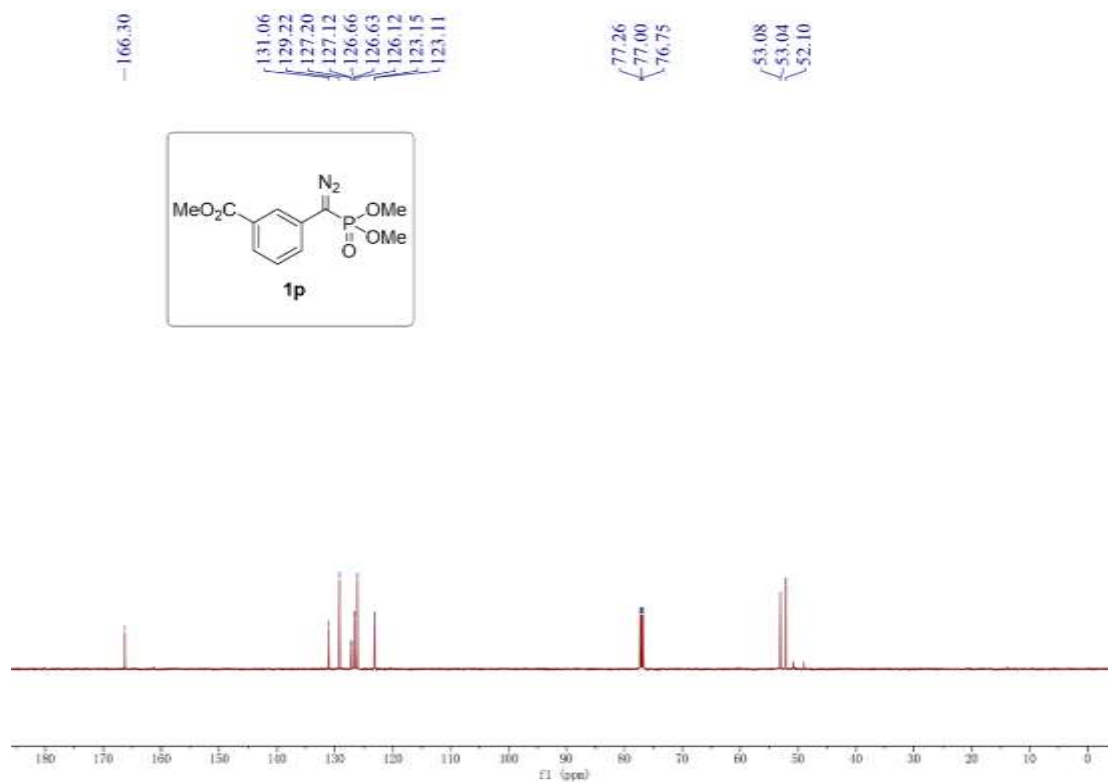

**<sup>31</sup>P NMR (202 MHz, Chloroform-*d*)**

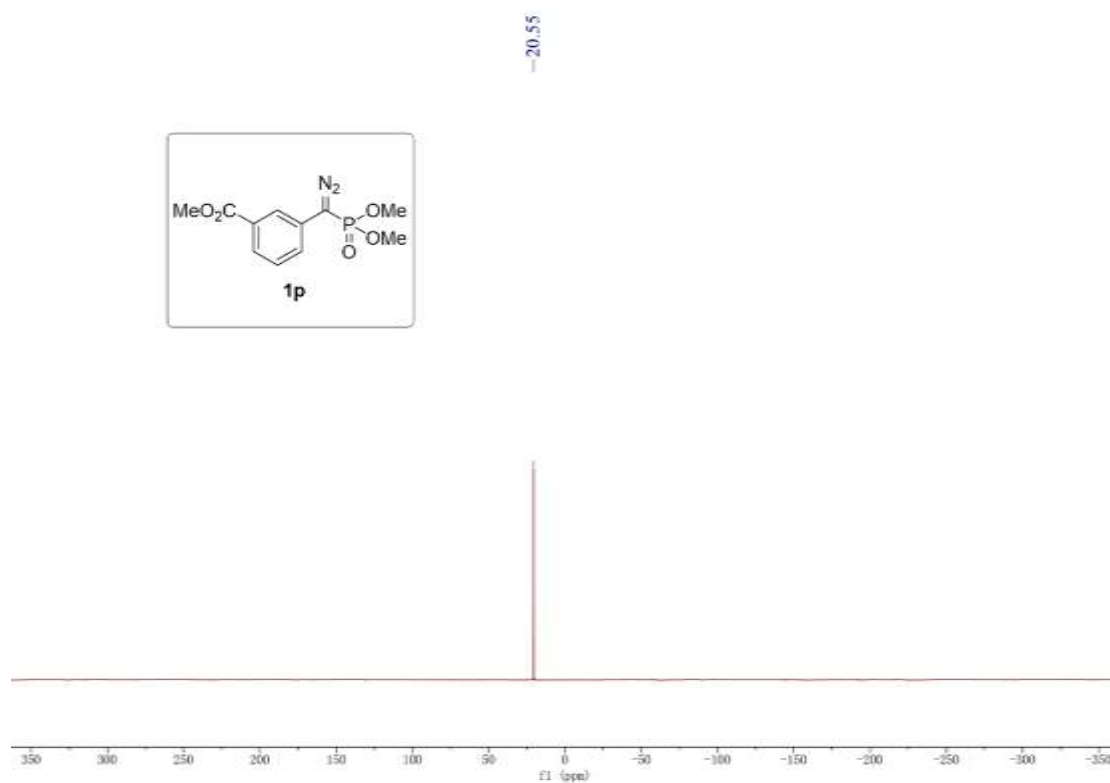

**Dimethyl (diazo(3-iodophenyl)methyl)phosphonate (1q)**

**<sup>1</sup>H NMR (400 MHz, Chloroform-*d*)**

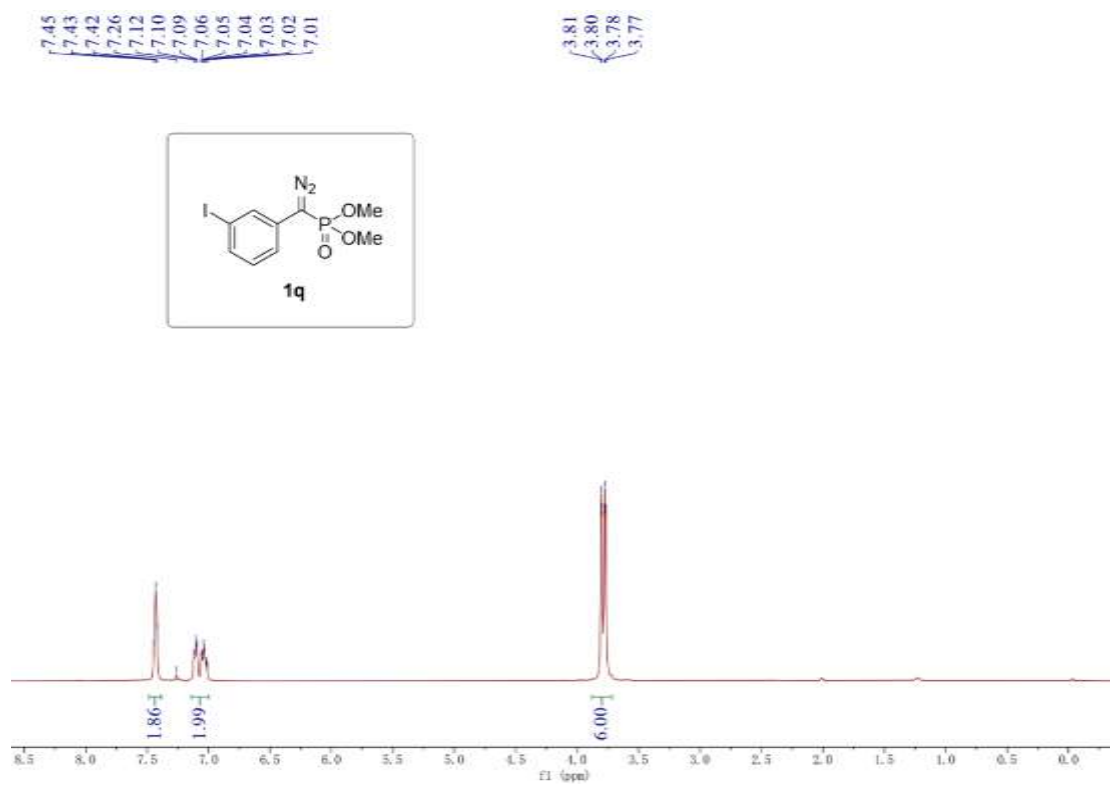



**$^{13}\text{C}$  NMR (101 MHz, Chloroform-*d*)**

134.12  
130.85  
130.80  
130.65  
128.93  
128.83  
121.68  
121.64

-95.05

77.33  
77.00  
76.69

53.20  
53.15

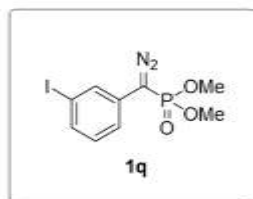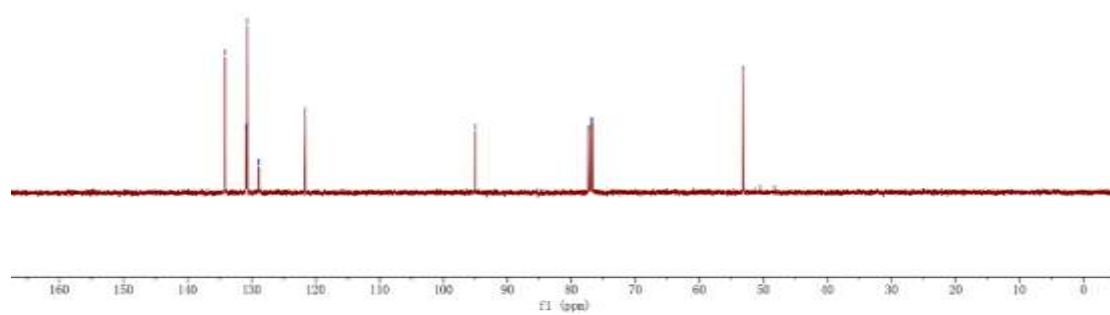

**$^{31}\text{P}$  NMR (162 MHz, Chloroform-*d*)**

19.65

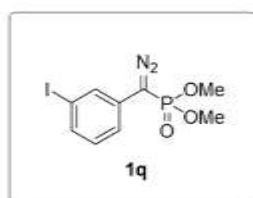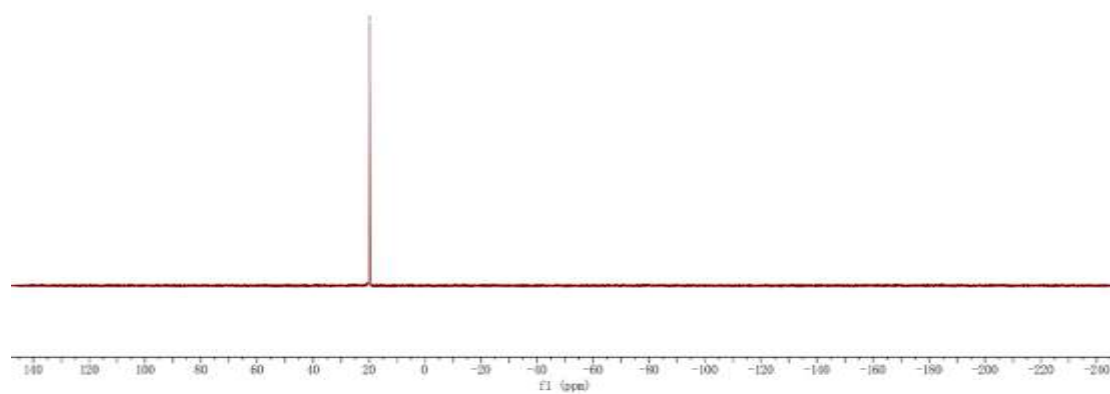

**Dimethyl (diazo(2-fluorophenyl)methyl)phosphonate (1r)**

**<sup>1</sup>H NMR (500 MHz, Chloroform-*d*)**

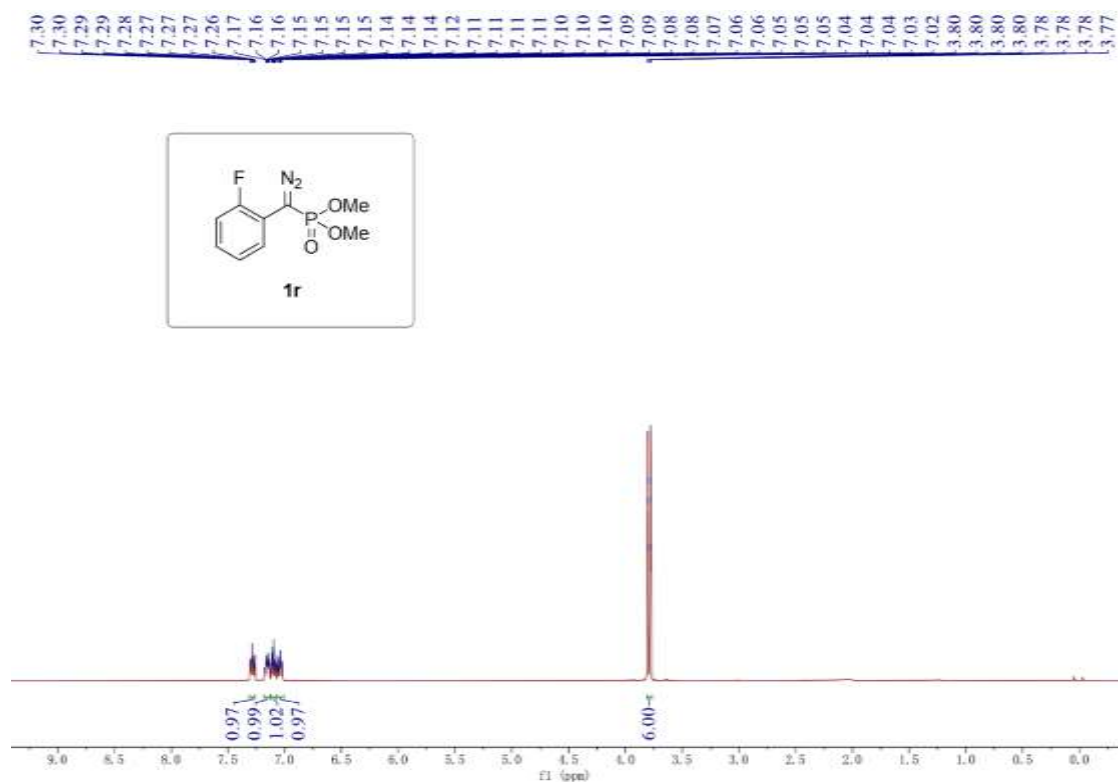

**Dimethyl ((3-chloro-4-fluorophenyl)(diazo)methyl)phosphonate (1s)**

**<sup>1</sup>H NMR (400 MHz, Chloroform-*d*)**

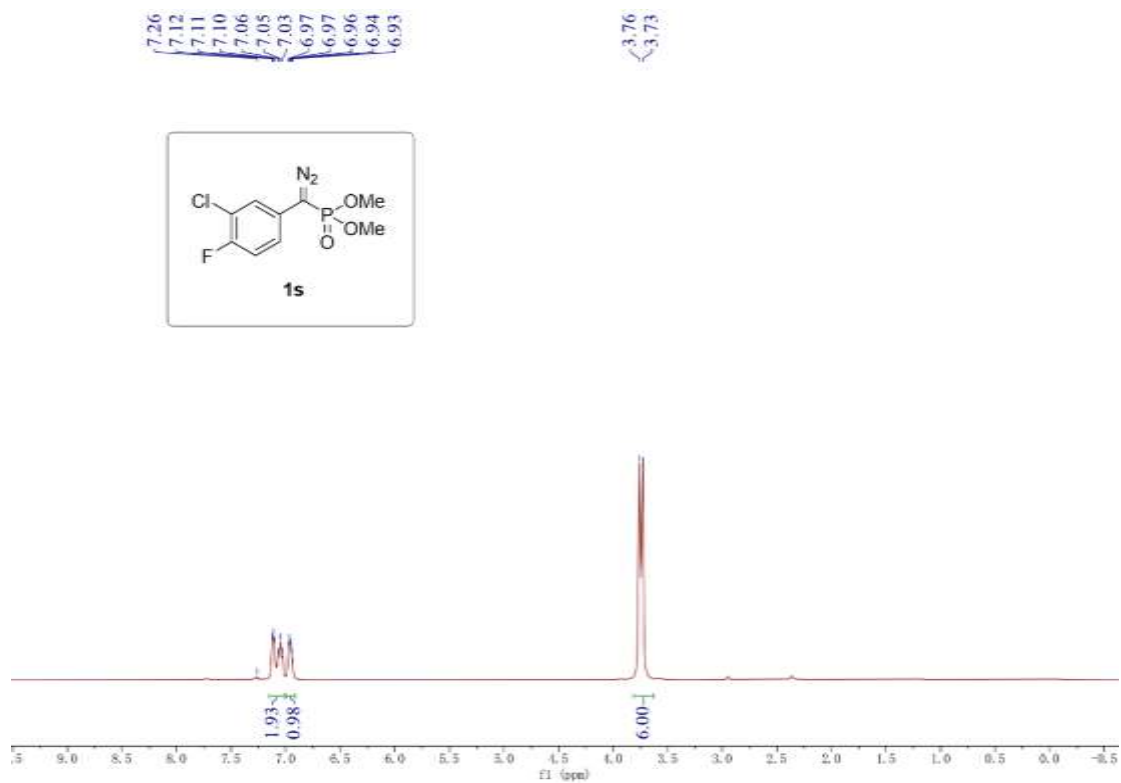

**<sup>13</sup>C NMR (101 MHz, Chloroform-*d*)**

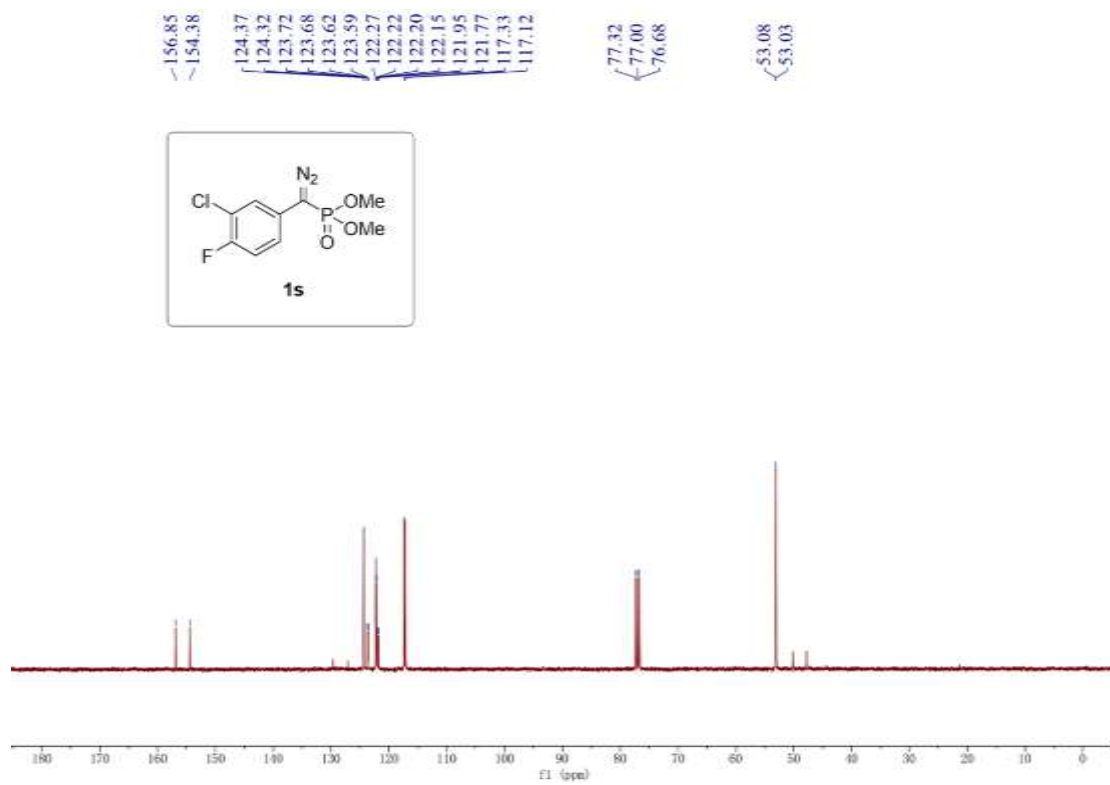

**<sup>31</sup>P NMR (162 MHz, Chloroform-*d*)**

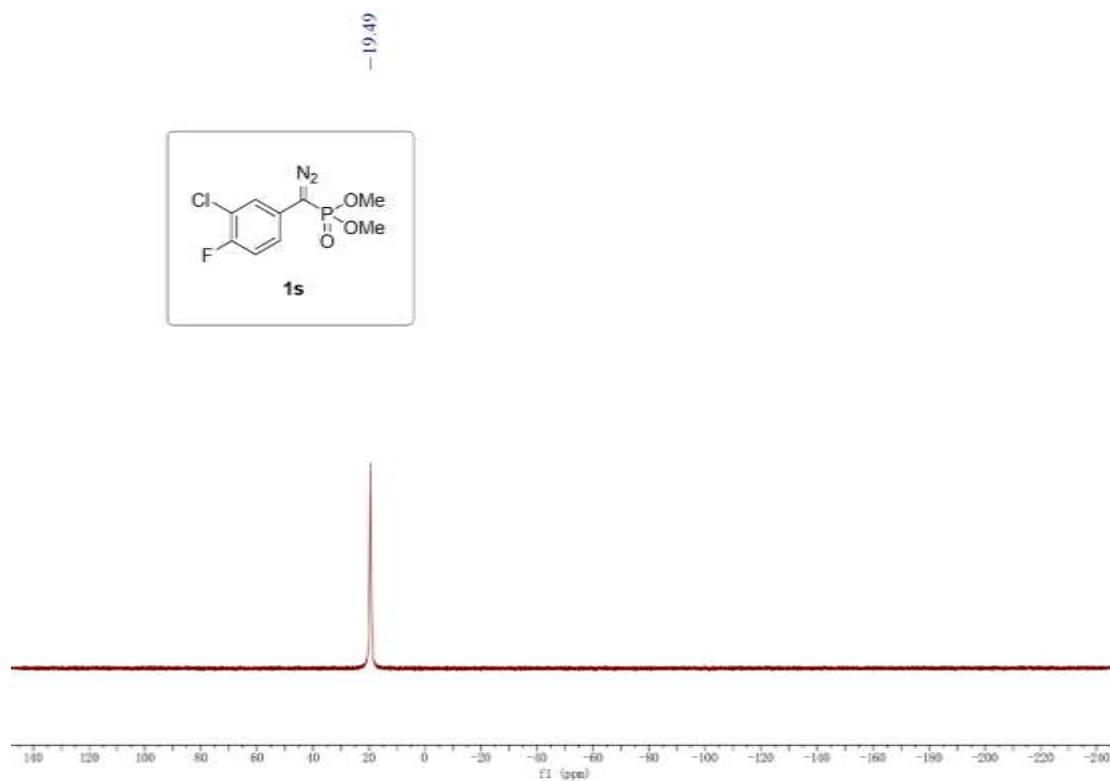

**<sup>19</sup>F NMR (376 MHz, Chloroform-*d*)**

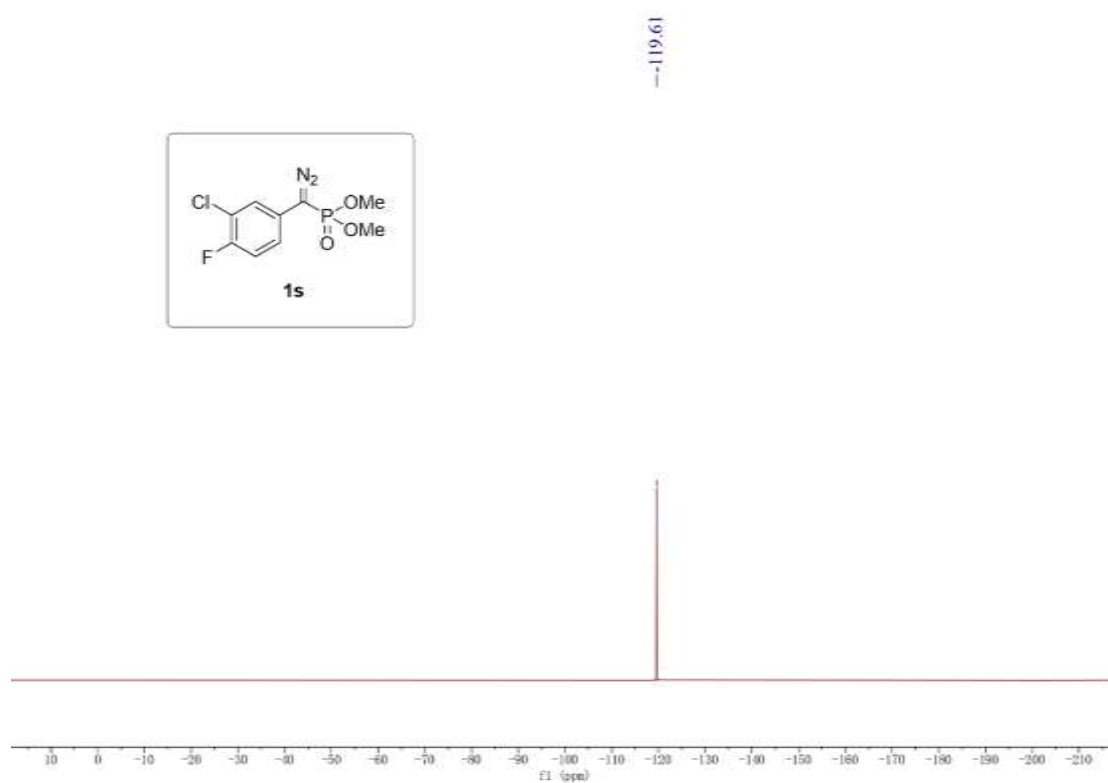

**Dimethyl (diazo(4-methyl-3-nitrophenyl)methyl)phosphonate (1t)**

**<sup>1</sup>H NMR (400 MHz, Chloroform-*d*)**

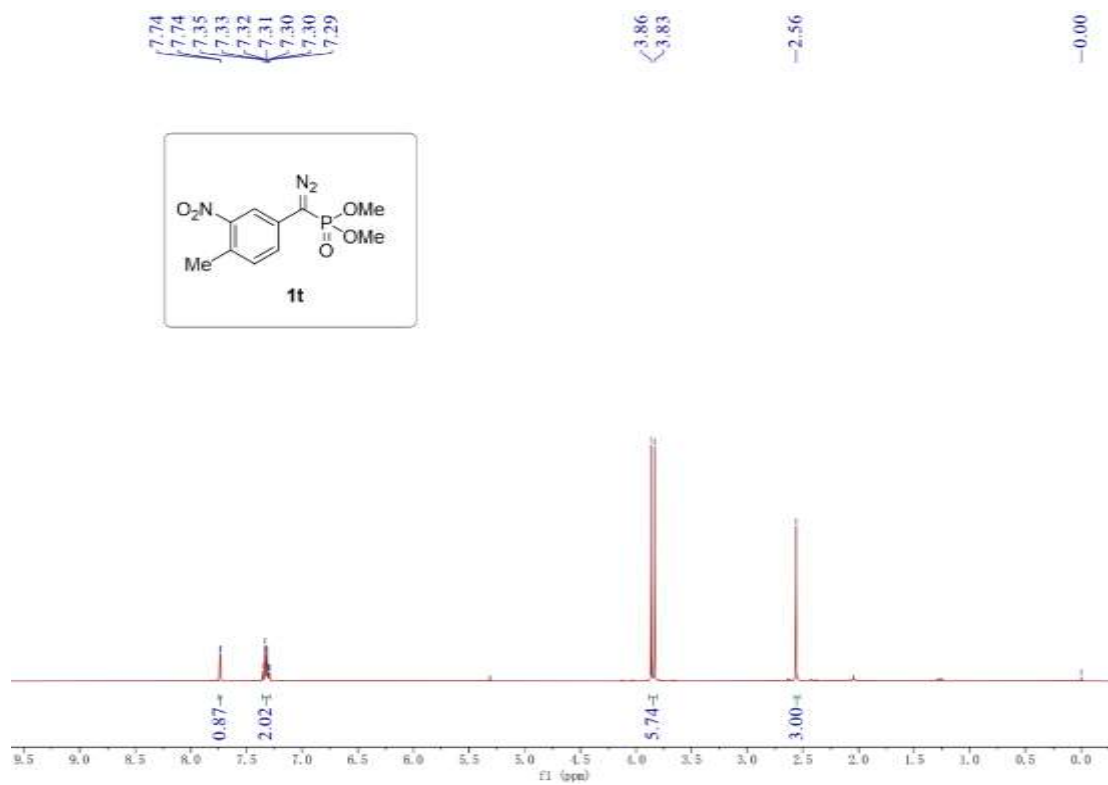

<sup>13</sup>C NMR (101 MHz, Chloroform-*d*)

149.77  
133.61  
129.95  
126.57  
126.52  
126.49  
126.39  
118.16  
118.12

77.32  
77.00  
76.68

53.34  
53.29

19.76

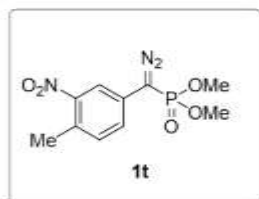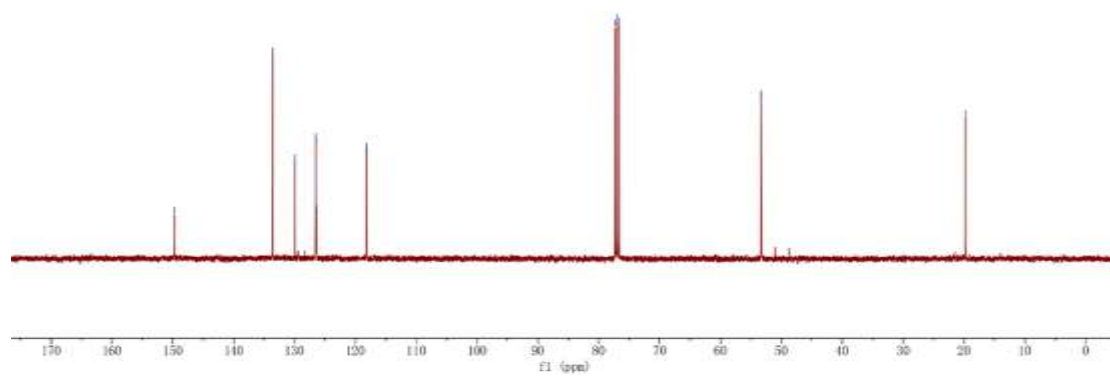

<sup>31</sup>P NMR (162 MHz, Chloroform-*d*)

19.00

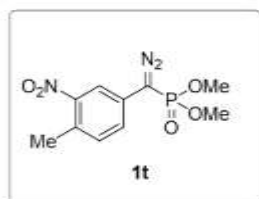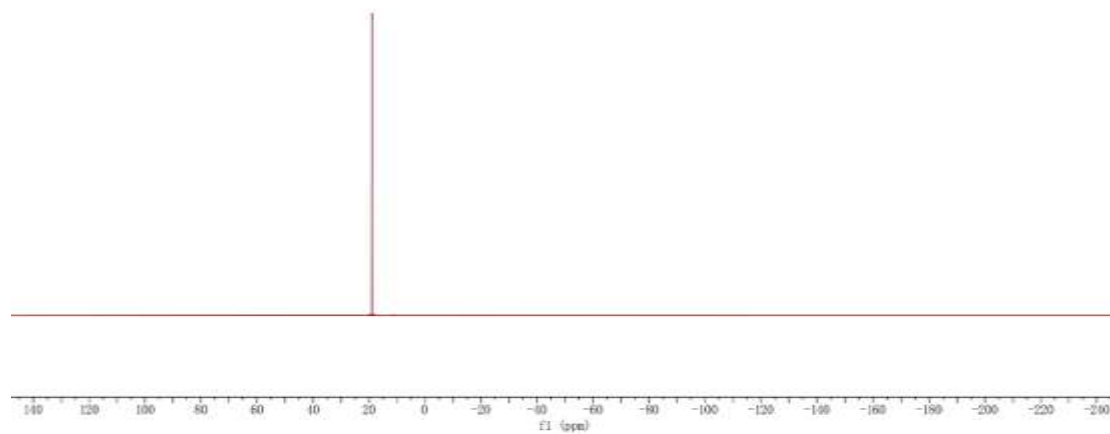

### Dimethyl (diazo(3,5-dimethoxyphenyl)methyl)phosphonate (**1u**)

<sup>1</sup>H NMR (500 MHz, Chloroform-*d*)

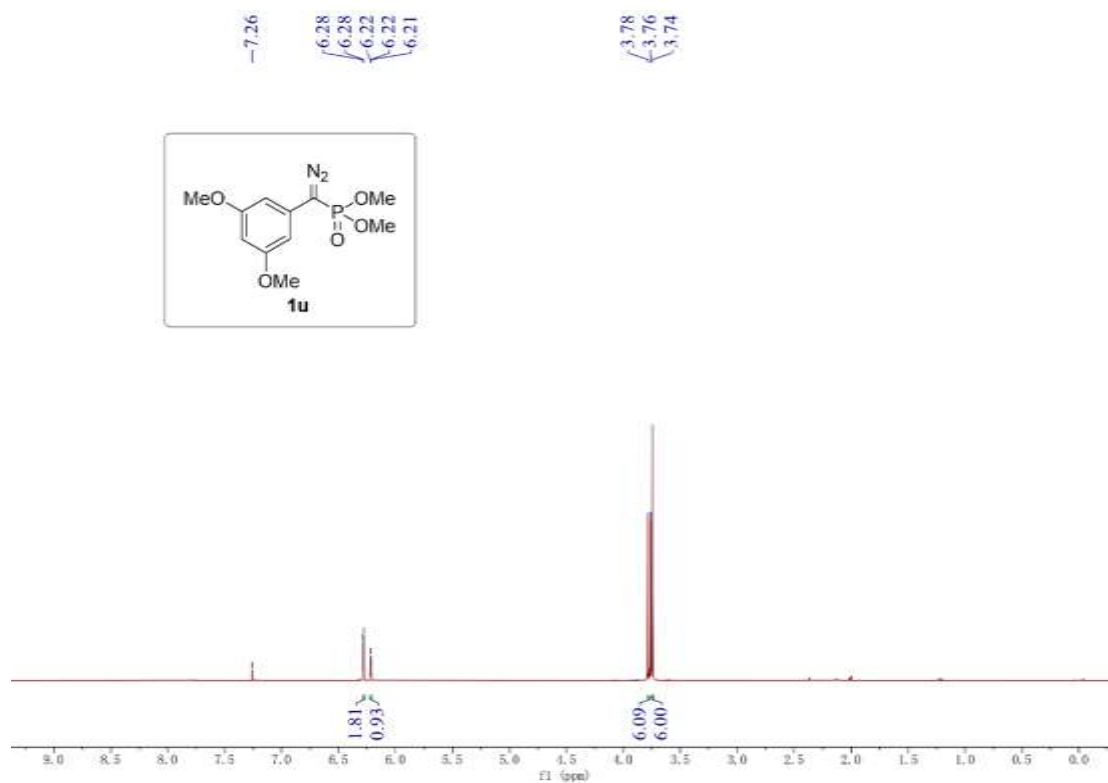

<sup>13</sup>C NMR (101 MHz, Chloroform-*d*)

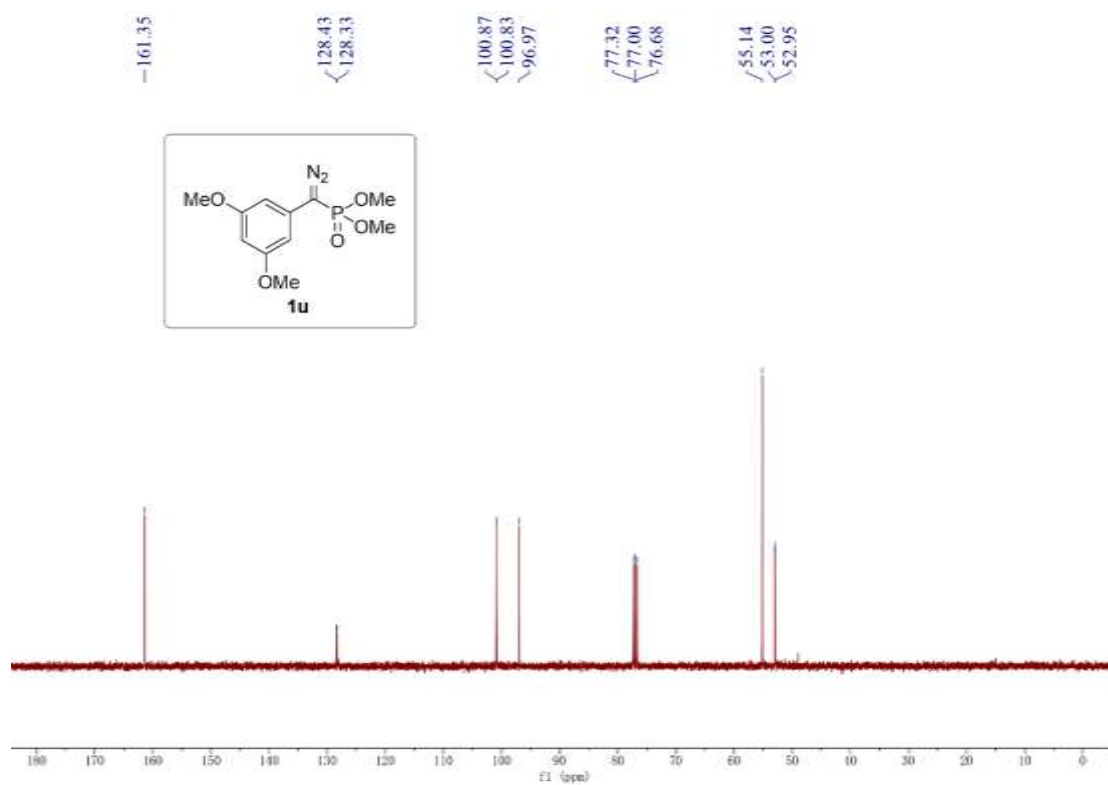

**<sup>31</sup>P NMR (162 MHz, Chloroform-*d*)**

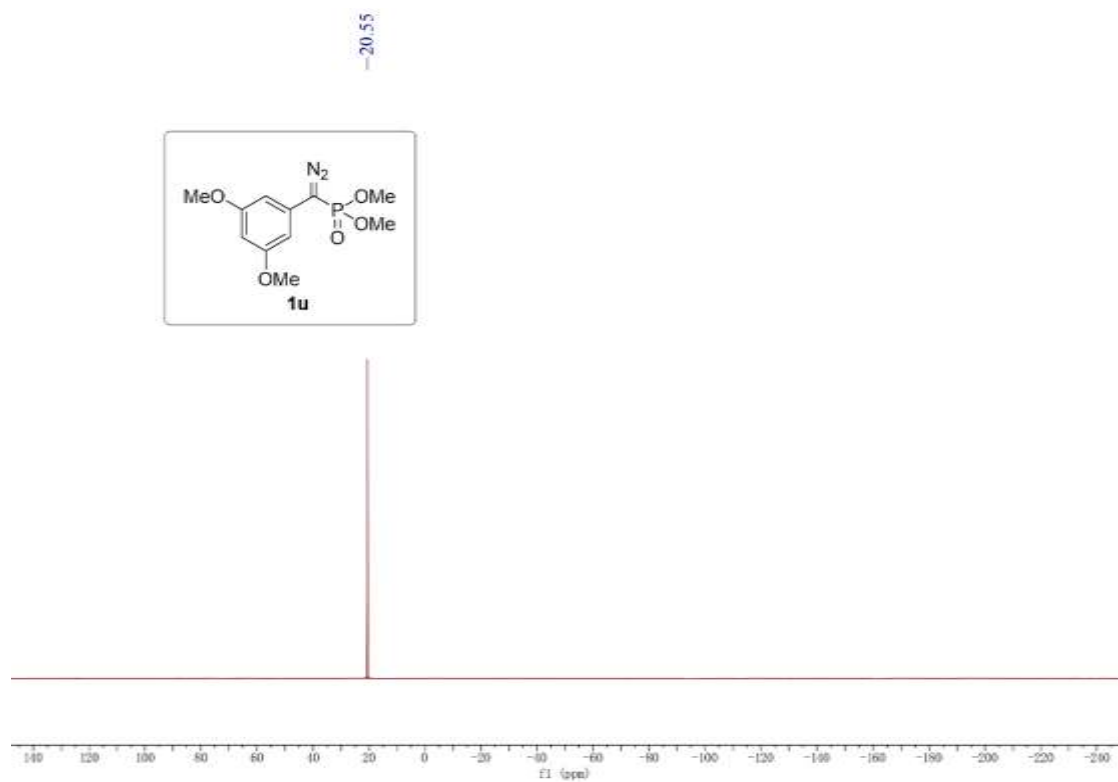

**Dimethyl (diazo(9H-fluoren-2-yl)methyl)phosphonate (1v)**

**<sup>1</sup>H NMR (500 MHz, Chloroform-*d*)**

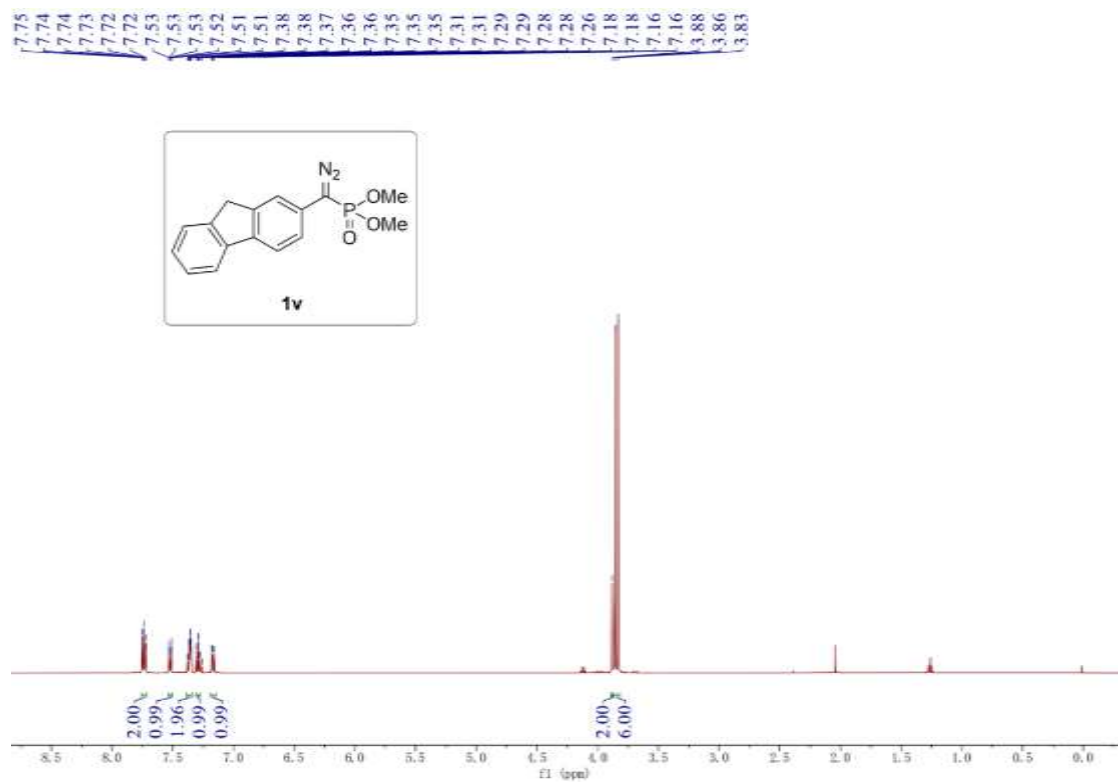

**$^{13}\text{C}$  NMR (126 MHz, Chloroform-*d*)**

144.50  
142.76  
140.94  
139.33  
126.75  
126.65  
124.90  
124.10  
124.03  
121.33  
121.29  
120.61  
119.58  
119.22  
119.18

77.25  
77.00  
76.75

53.10  
53.06

36.80

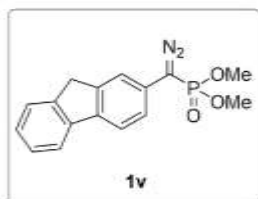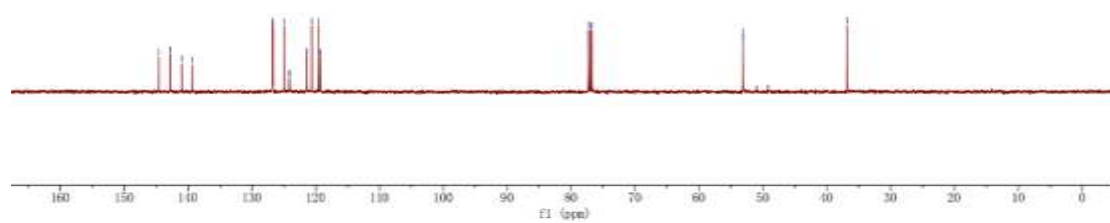

**$^{31}\text{P}$  NMR (202 MHz, Chloroform-*d*)**

-21.84

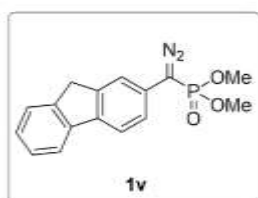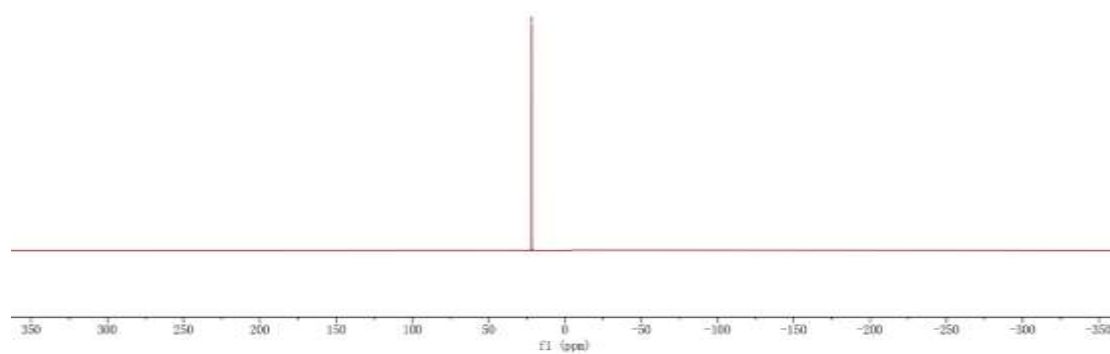



### Dimethyl (diazo(1H-indol-5-yl)methyl)phosphonate (1w)

<sup>1</sup>H NMR (400 MHz, Chloroform-*d*)

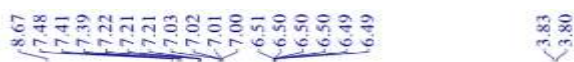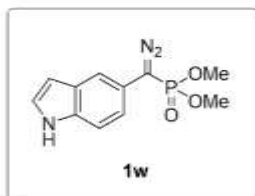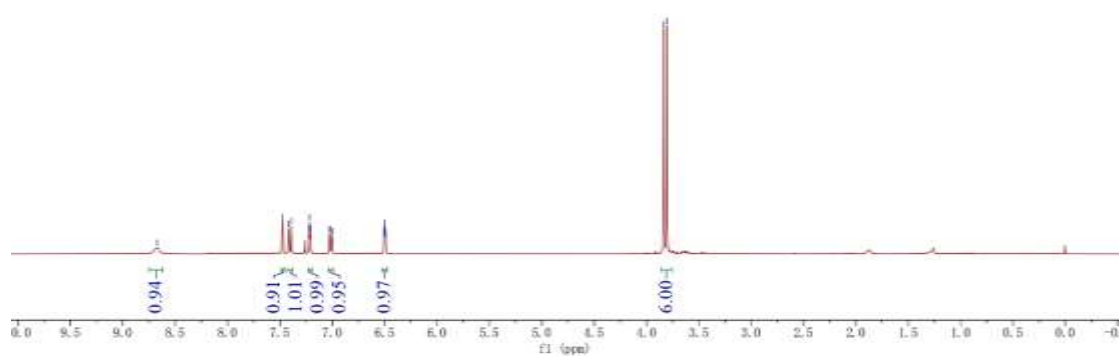

<sup>13</sup>C NMR (101 MHz, Chloroform-*d*)

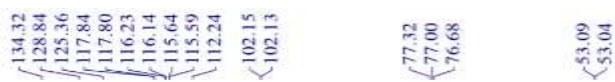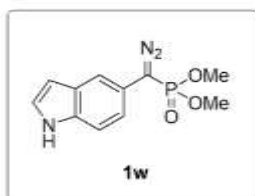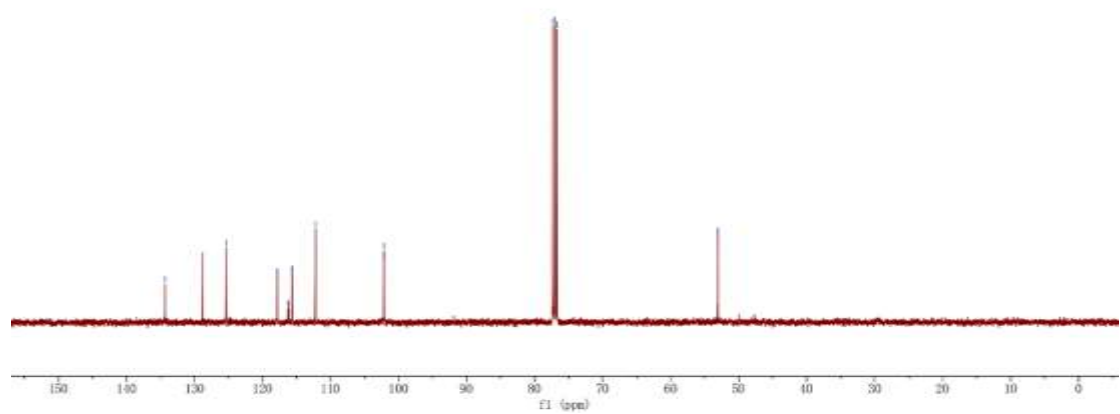

**<sup>31</sup>P NMR (162 MHz, Chloroform-*d*)**

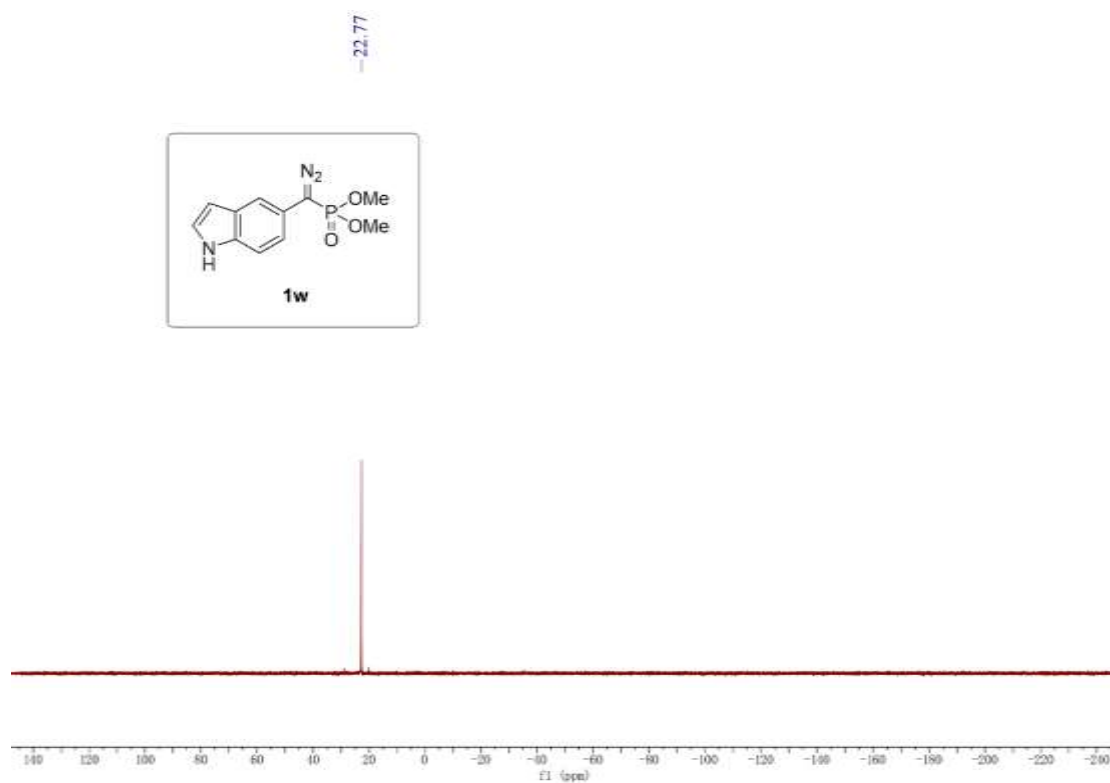

**Dimethyl (benzo[d][1,3]dioxol-5-yl(diazo)methyl)phosphonate (1x)**

**<sup>1</sup>H NMR (400 MHz, Chloroform-*d*)**

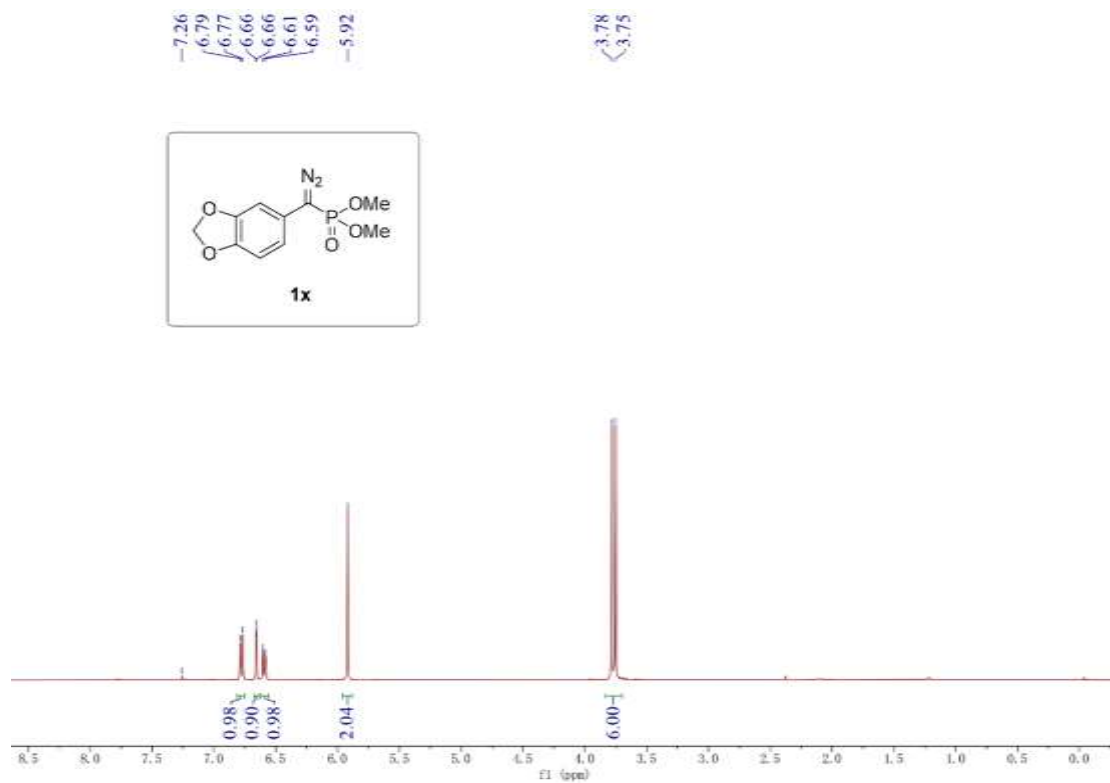

**$^{13}\text{C}$  NMR (101 MHz, Chloroform-*d*)**

148.59  
145.68

119.17  
119.07  
116.34  
116.29  
109.11  
103.98  
103.93  
101.19

77.32  
77.00  
76.68

53.03  
52.98

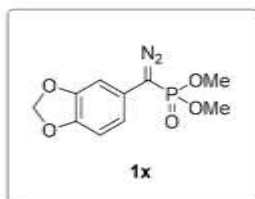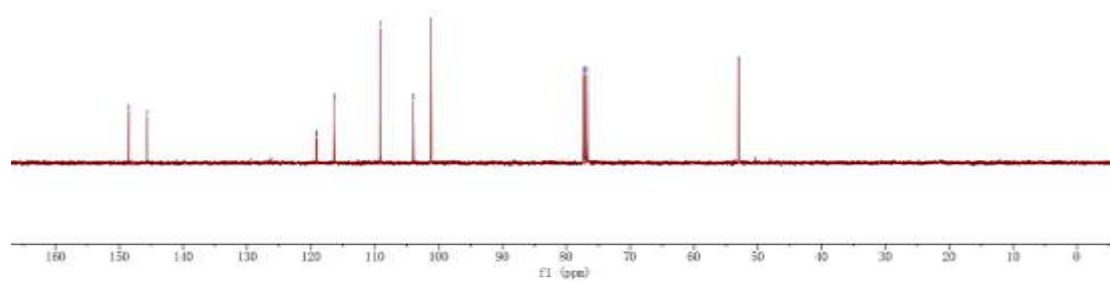

**$^{31}\text{P}$  NMR (162 MHz, Chloroform-*d*)**

21.17

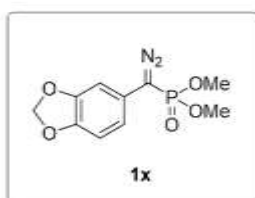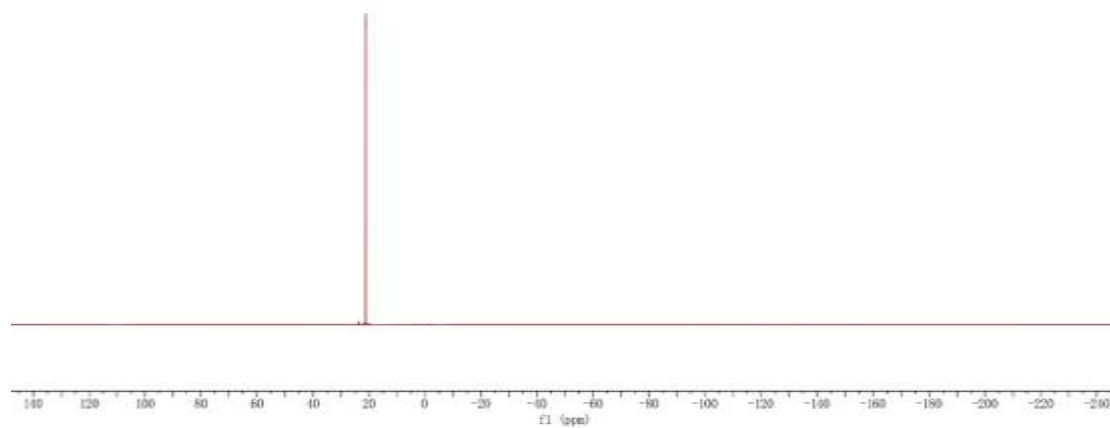

**Dimethyl (diazo(dibenzo[b,d]furan-1-yl)methyl)phosphonate (1y)**

**<sup>1</sup>H NMR (400 MHz, Chloroform-*d*)**

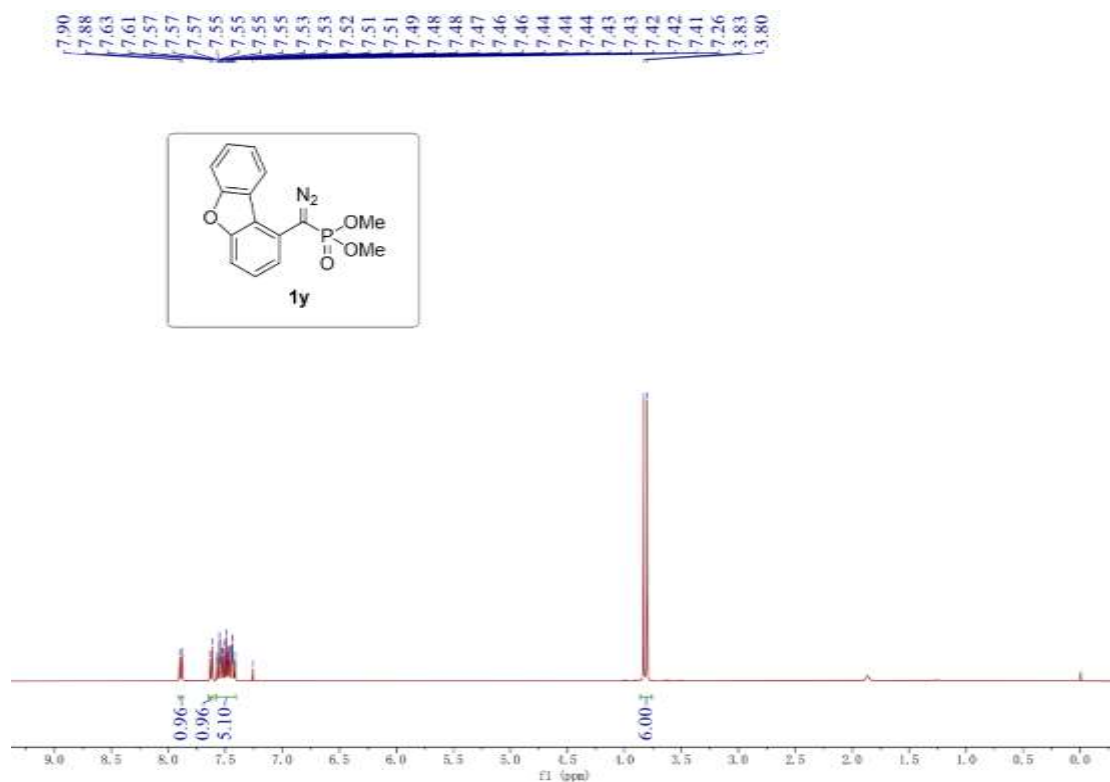

**<sup>13</sup>C NMR (101 MHz, Chloroform-*d*)**

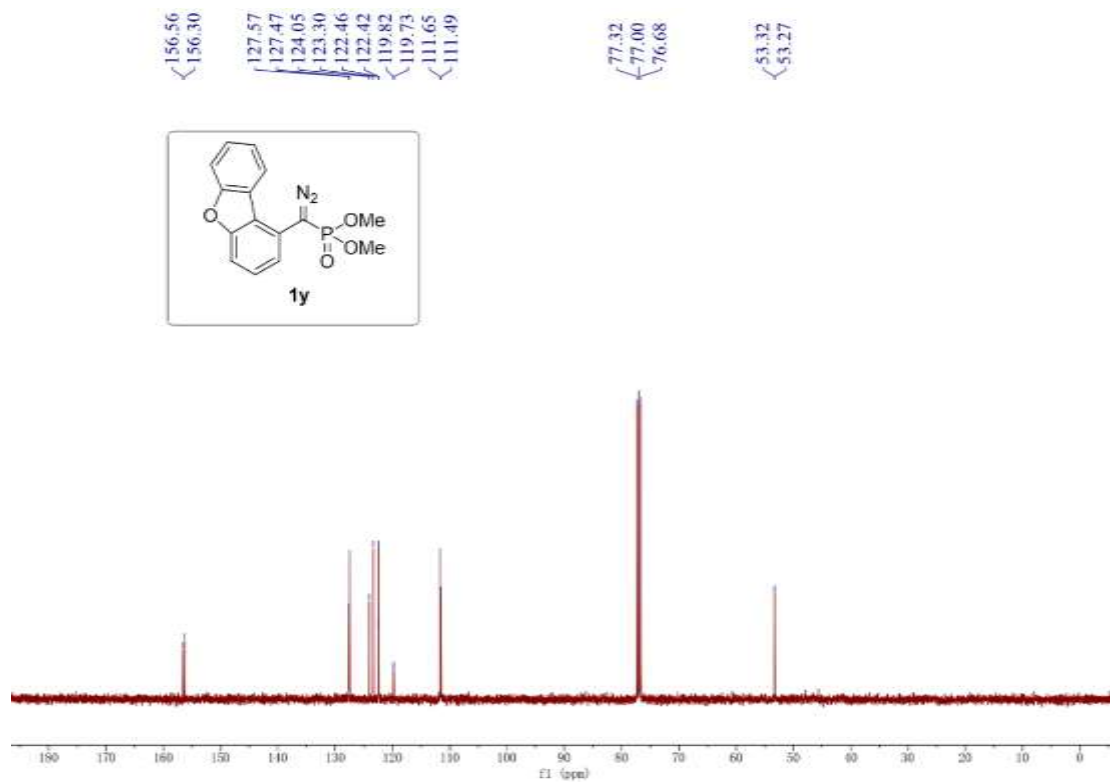

**<sup>31</sup>P NMR (162 MHz, Chloroform-*d*)**

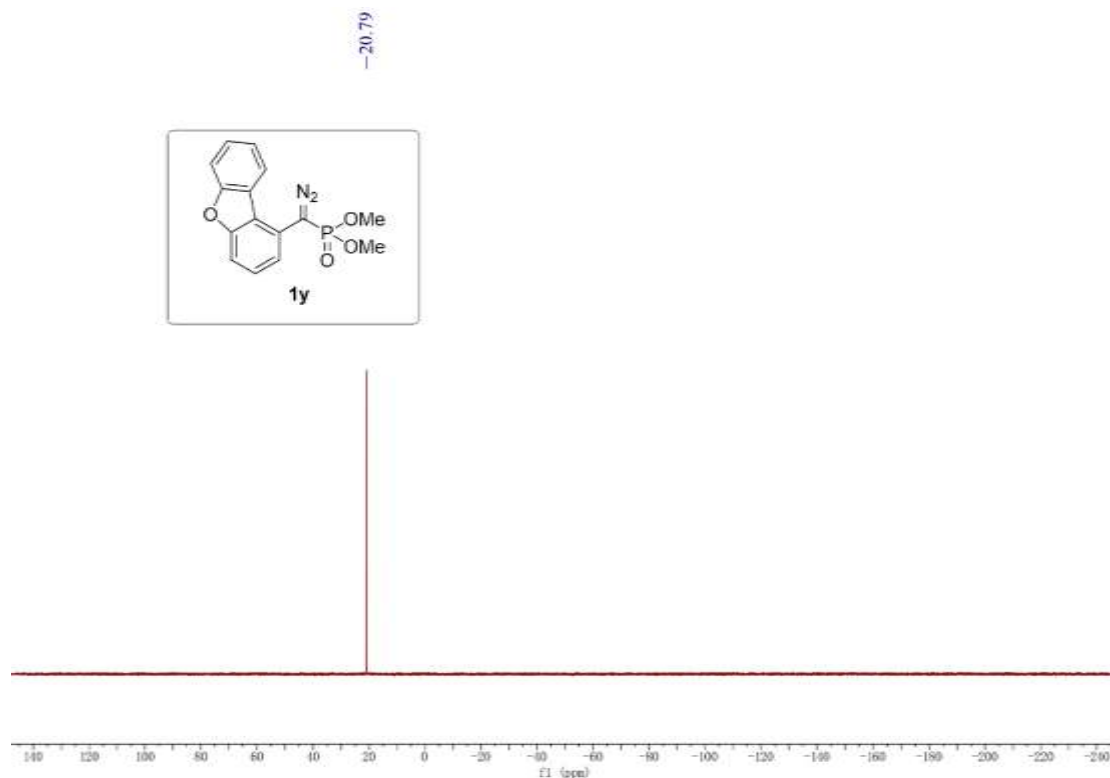

**Dimethyl (diazo(dibenzo[b,d]thiophen-4-yl)methyl)phosphonate (1z)**

**<sup>1</sup>H NMR (400 MHz, Chloroform-*d*)**

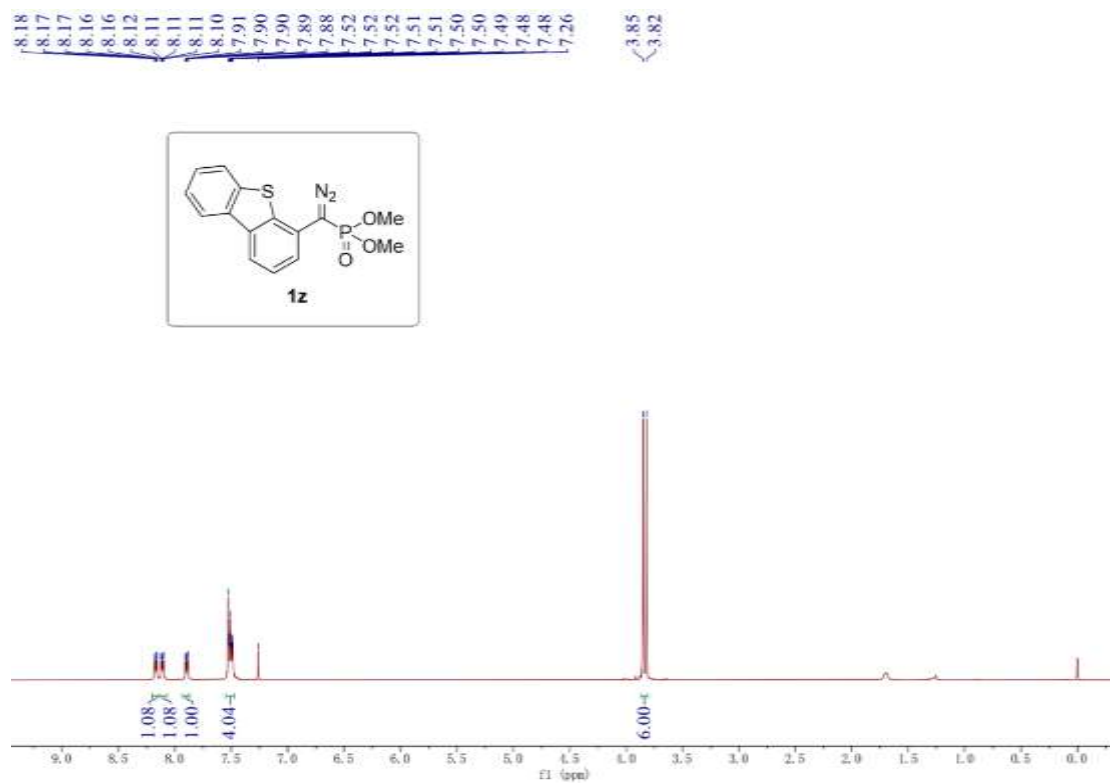

**<sup>13</sup>C NMR (101 MHz, Chloroform-*d*)**

138.65  
138.34  
138.28  
136.78  
135.50  
127.26  
126.69  
125.49  
124.79  
122.79  
121.84  
121.03  
120.07  
119.97

77.32  
77.00  
76.68

53.38  
53.32

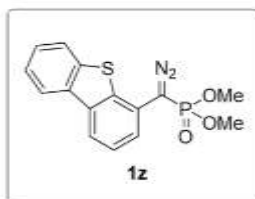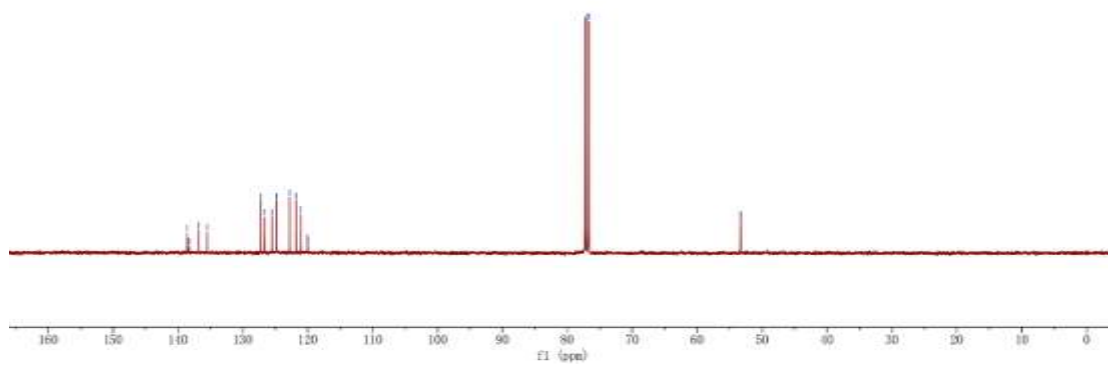

**<sup>31</sup>P NMR (162 MHz, Chloroform-*d*)**

20.89

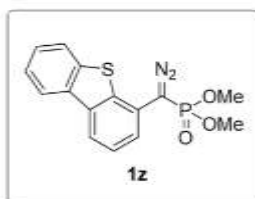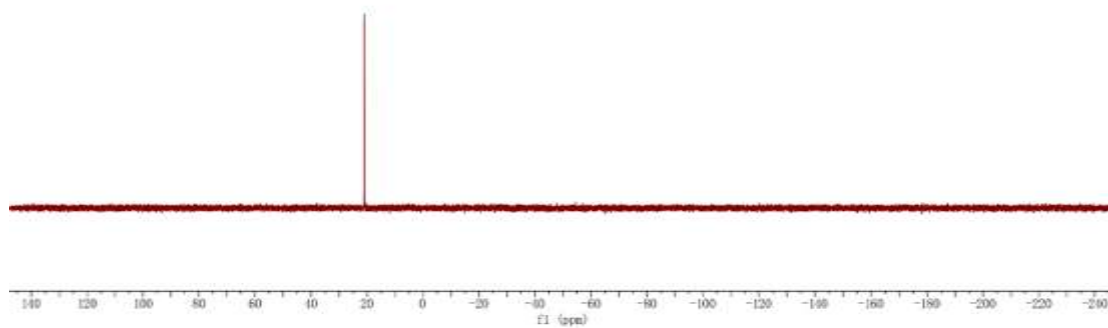

### Dimethyl (diazo(phenanthren-9-yl)methyl)phosphonate (1A)

<sup>1</sup>H NMR (400 MHz, Chloroform-*d*)

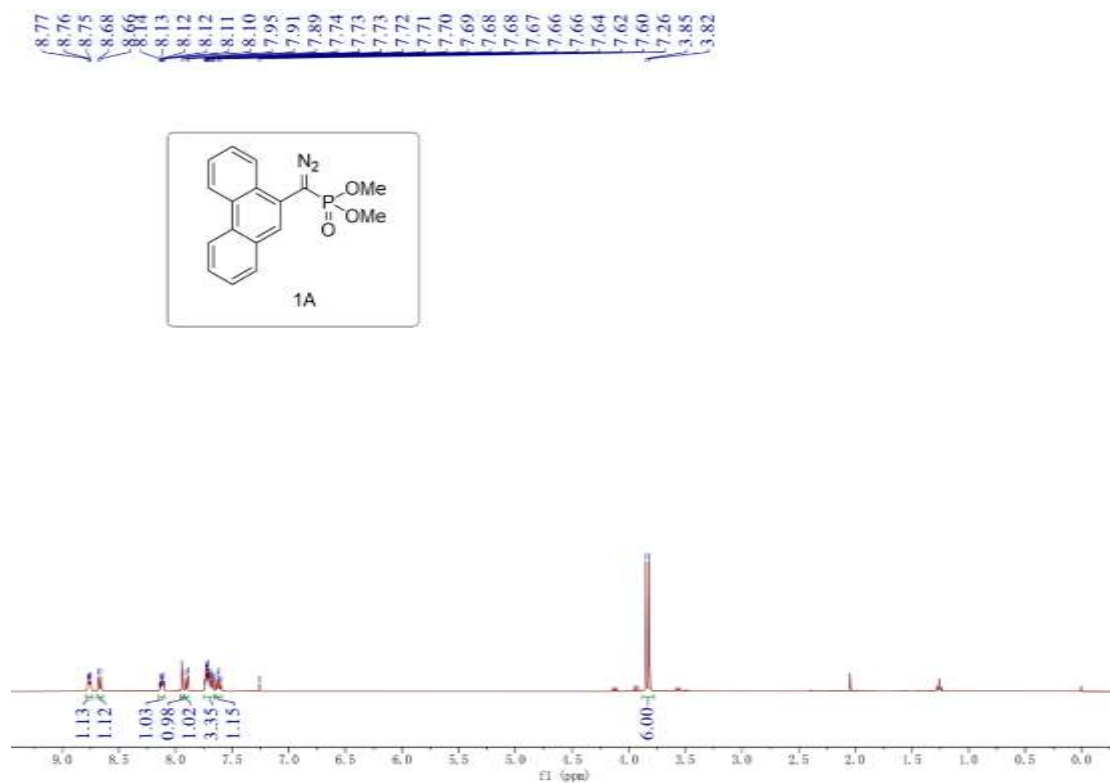

<sup>13</sup>C NMR (101 MHz, Chloroform-*d*)

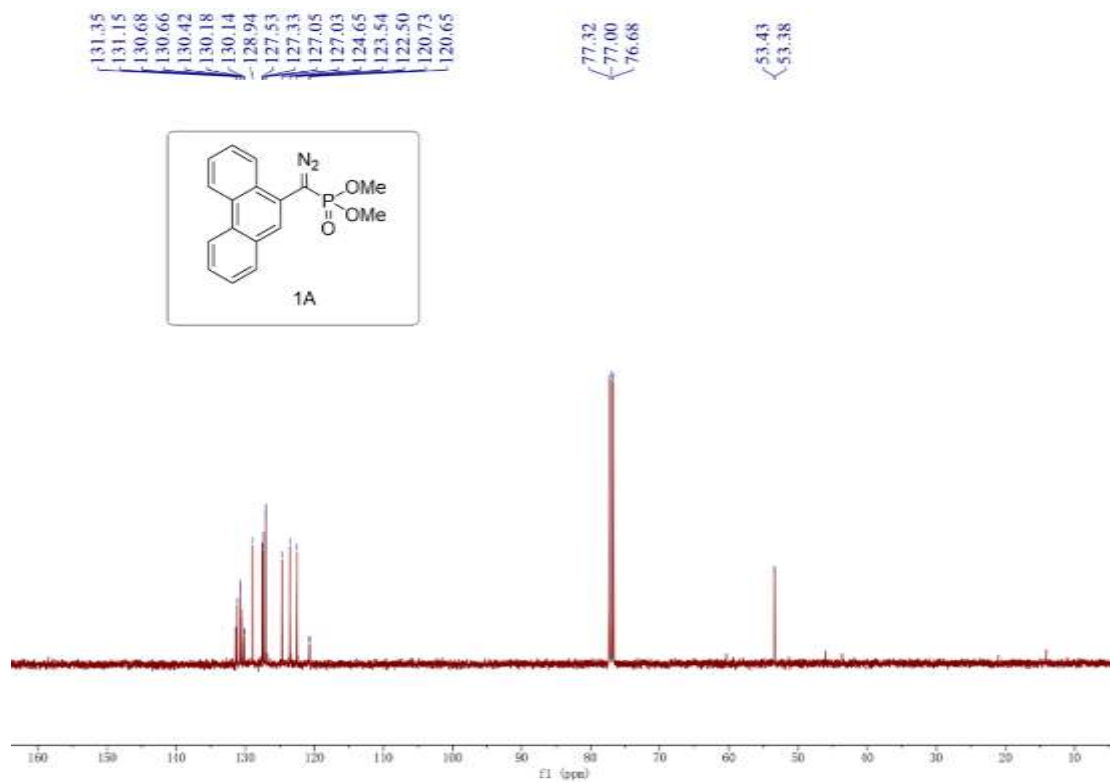

**<sup>31</sup>P NMR (202 MHz, Chloroform-*d*)**

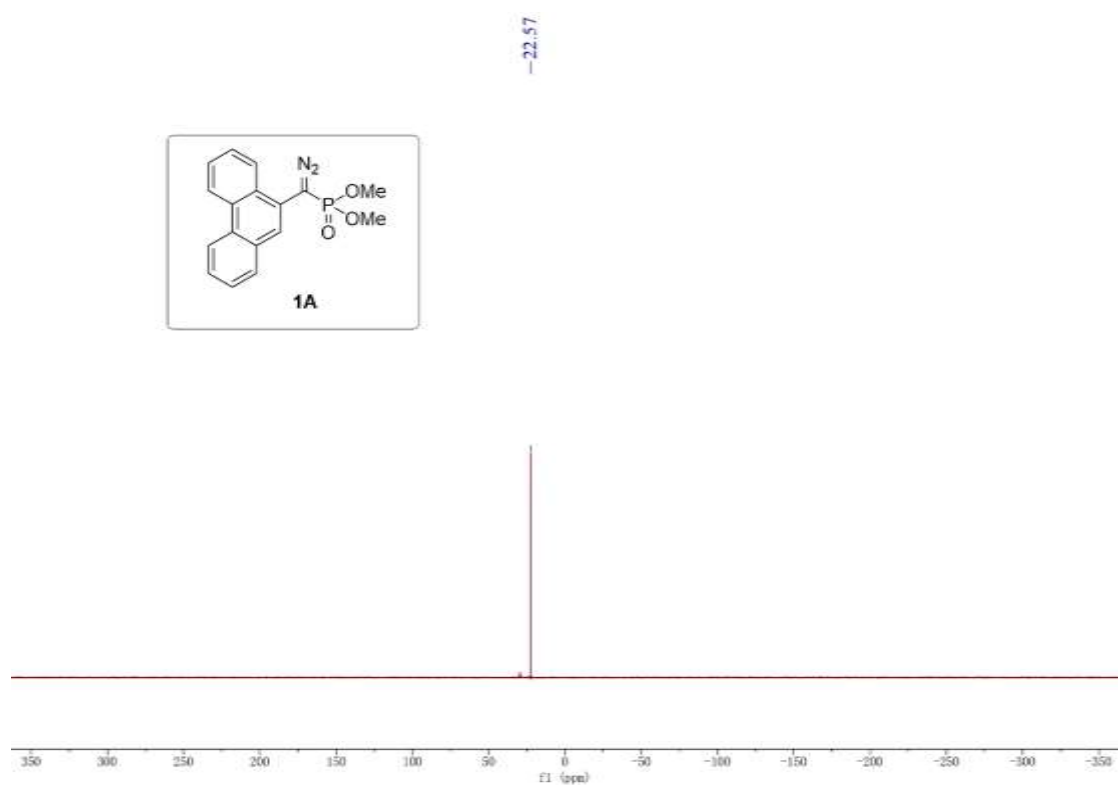

**Dimethyl (diazo(naphthalen-2-yl)methyl)phosphonate (1B)**

**<sup>1</sup>H NMR (400 MHz, Chloroform-*d*)**

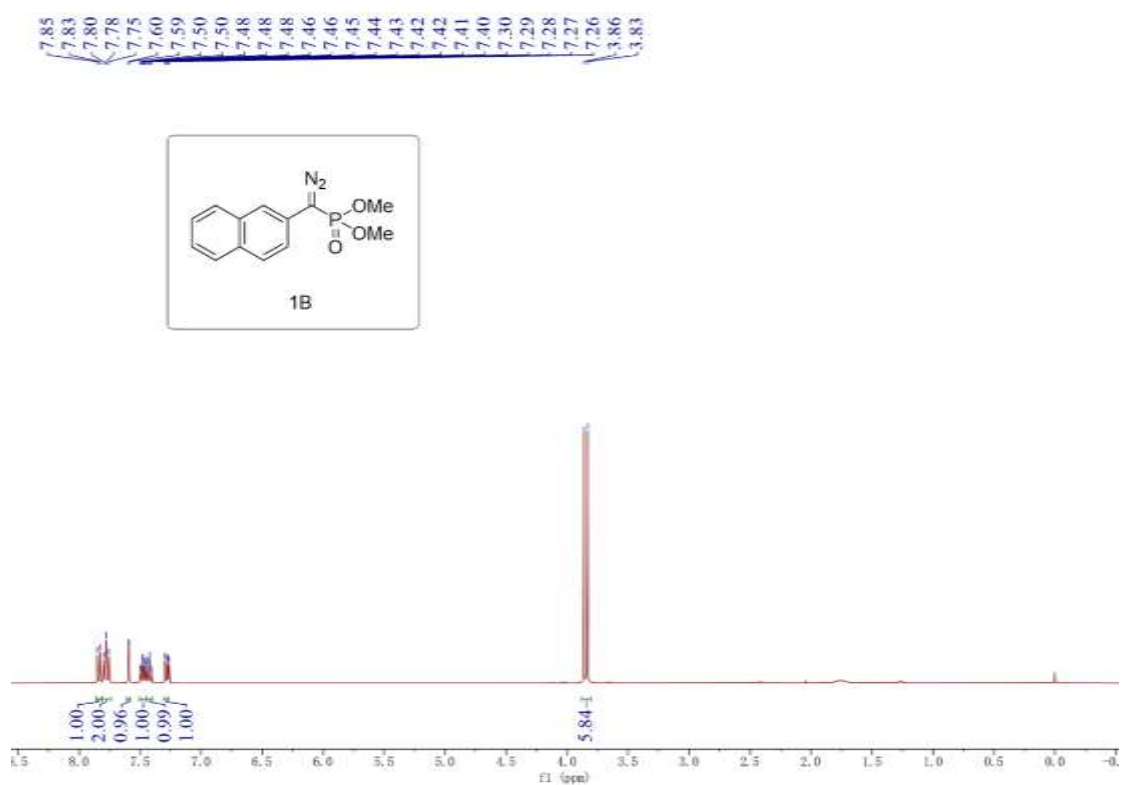



**$^{13}\text{C}$  NMR (101 MHz, Chloroform-*d*)**

133.70  
131.11  
129.10  
127.59  
127.16  
126.71  
125.50  
123.49  
123.40  
120.90  
120.85  
120.61  
120.57

77.32  
77.00  
76.68

53.12  
53.07

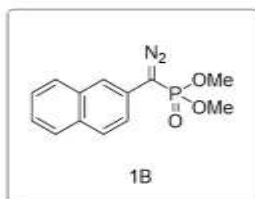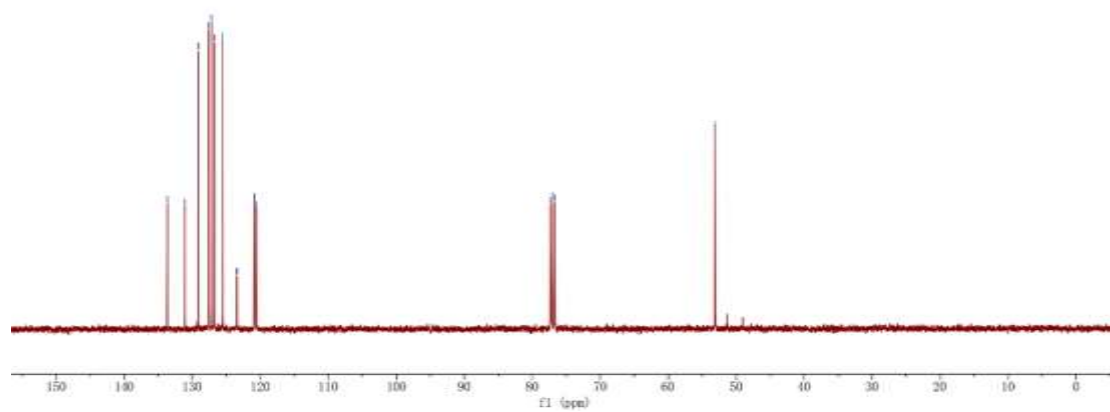

**$^{31}\text{P}$  NMR (162 MHz, Chloroform-*d*)**

20.90

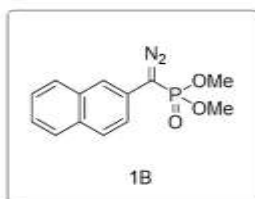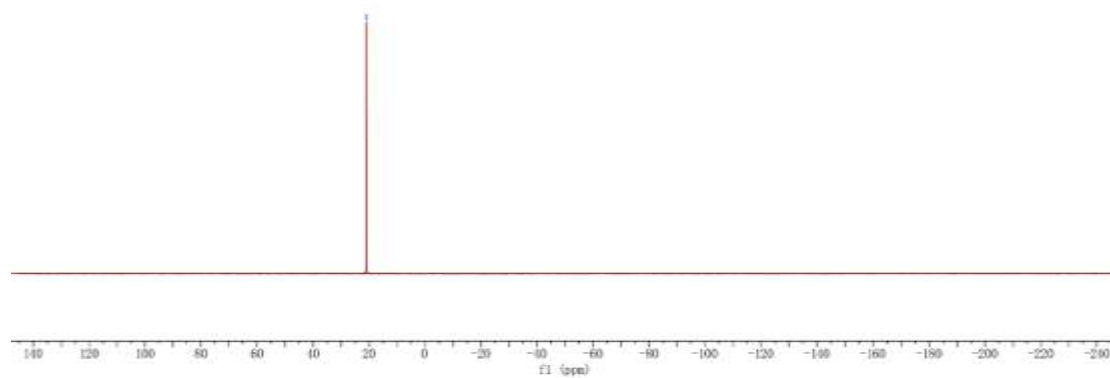

### Dimethyl (diazo(naphthalen-1-yl)methyl)phosphonate (1C)

<sup>1</sup>H NMR (500 MHz, Chloroform-*d*)

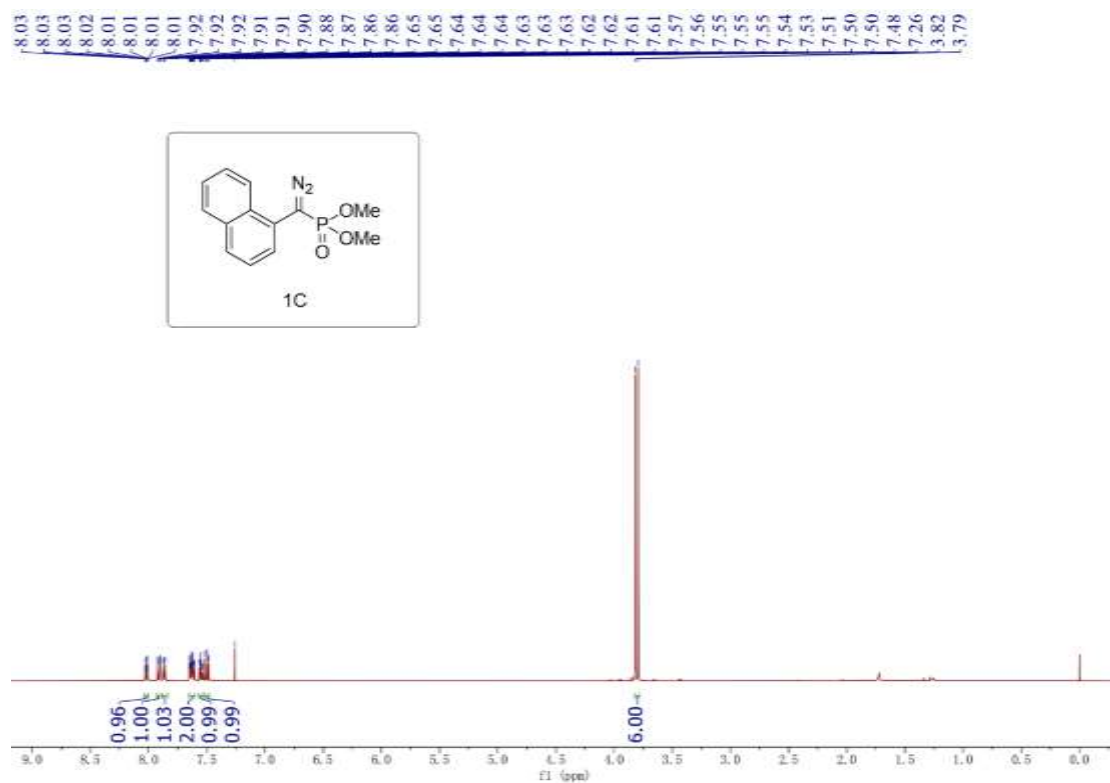

### Diethyl (diazo(phenyl)methyl)phosphonate (4a)

<sup>1</sup>H NMR (500 MHz, Chloroform-*d*)

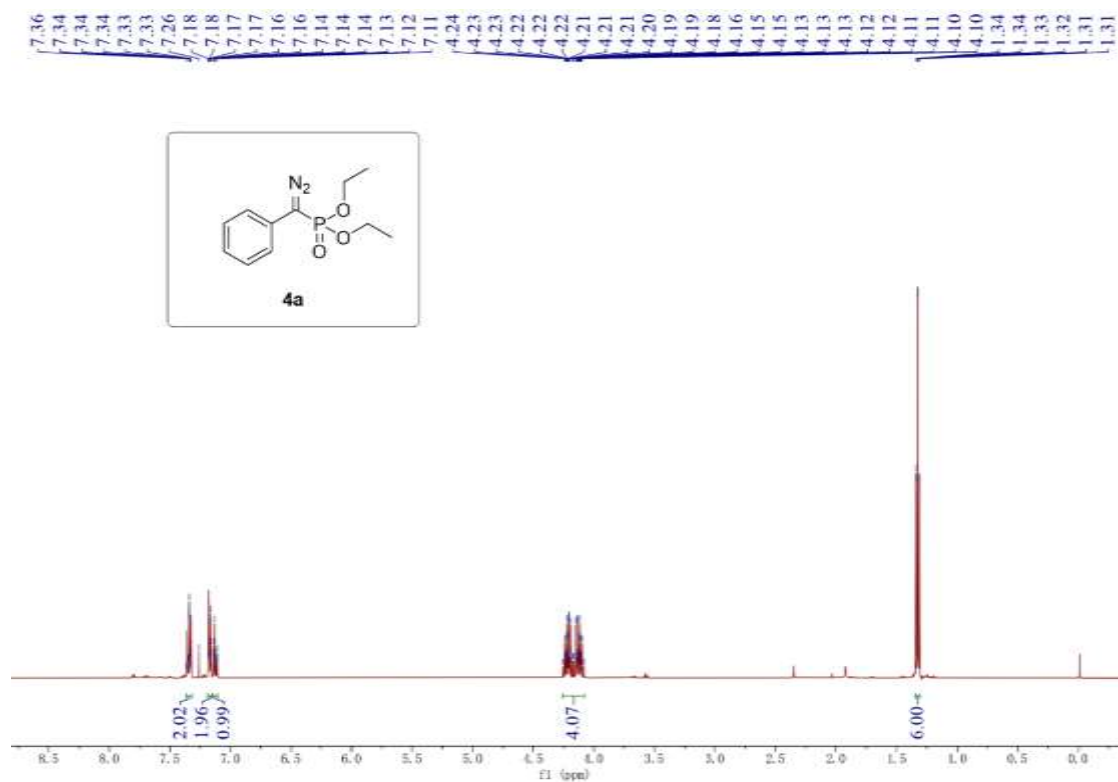

### Diisopropyl (diazo(phenyl)methyl)phosphonate (4b)

<sup>1</sup>H NMR (500 MHz, Chloroform-*d*)

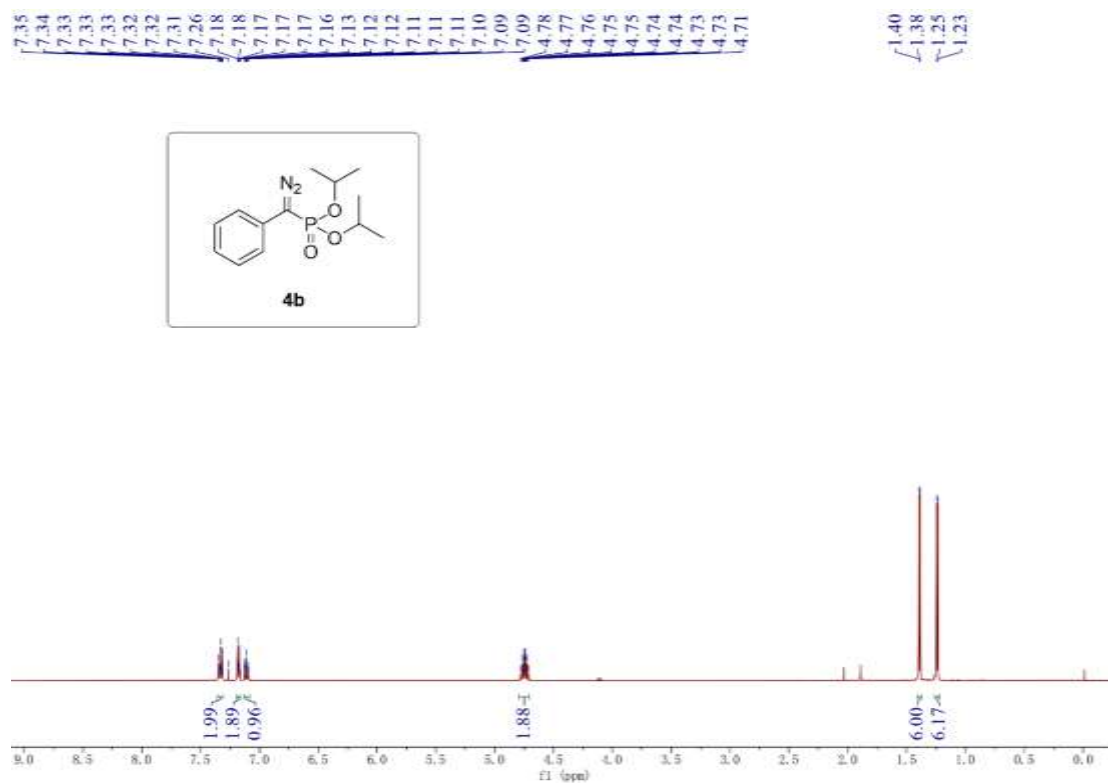

### Dihexyl (diazo(phenyl)methyl)phosphonate (4c)

<sup>1</sup>H NMR (500 MHz, Chloroform-*d*)

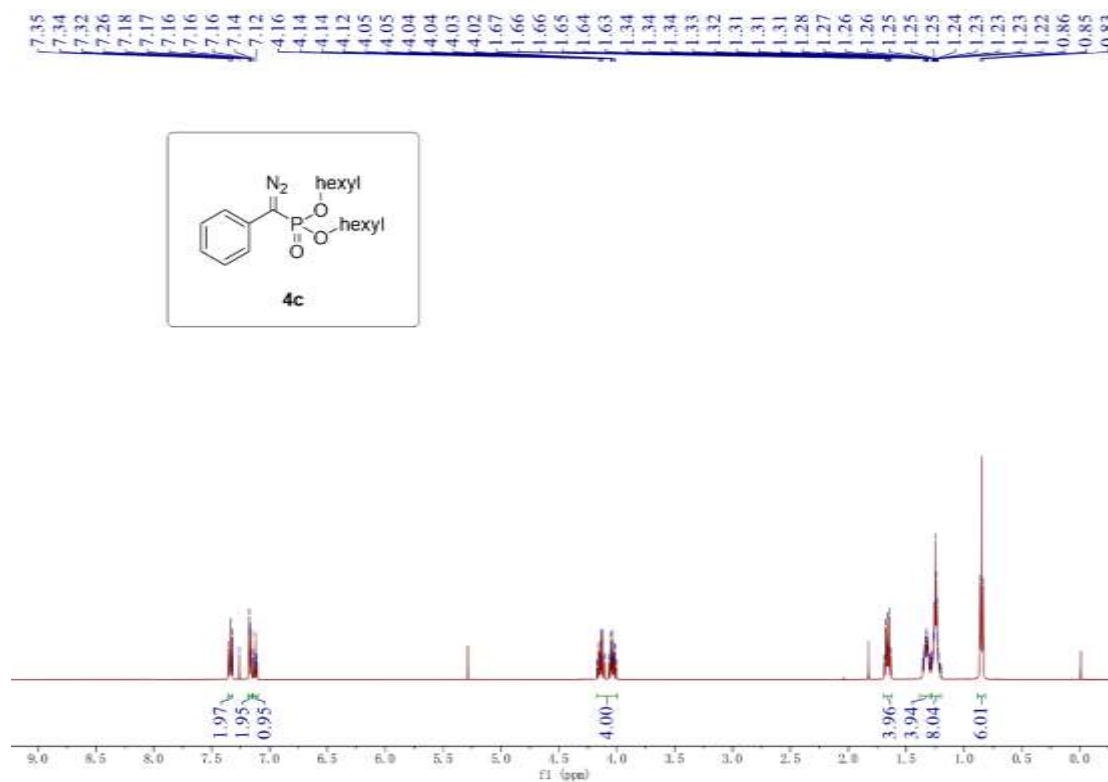

**<sup>13</sup>C NMR (126 MHz, Chloroform-*d*)**

129.13  
126.75  
126.68  
125.03  
122.64  
122.60

77.25  
77.00  
76.75  
66.83  
66.78

31.18  
30.15  
30.10  
25.09  
22.43  
13.89

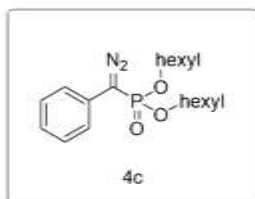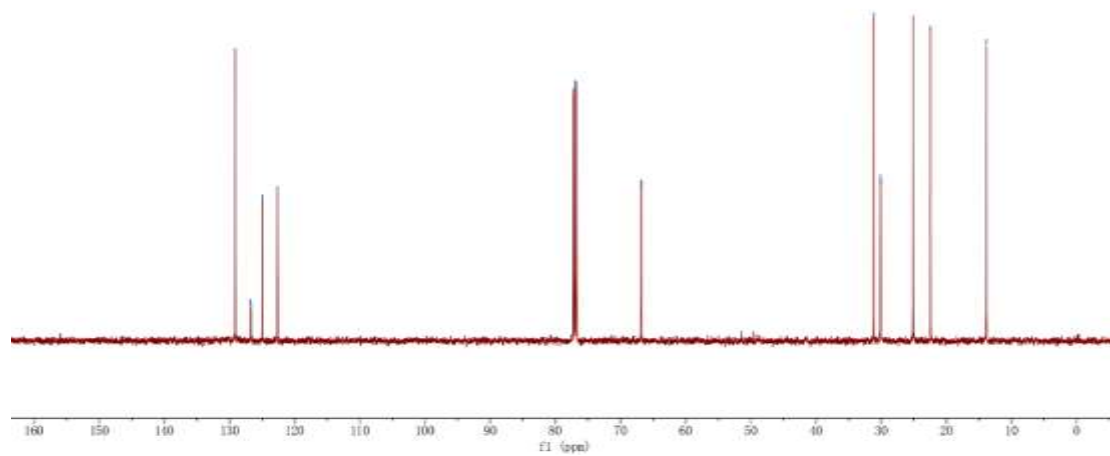

**<sup>31</sup>P NMR (202 MHz, Chloroform-*d*)**

-18.11

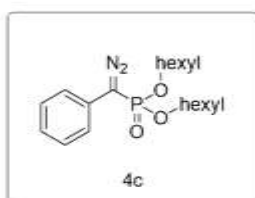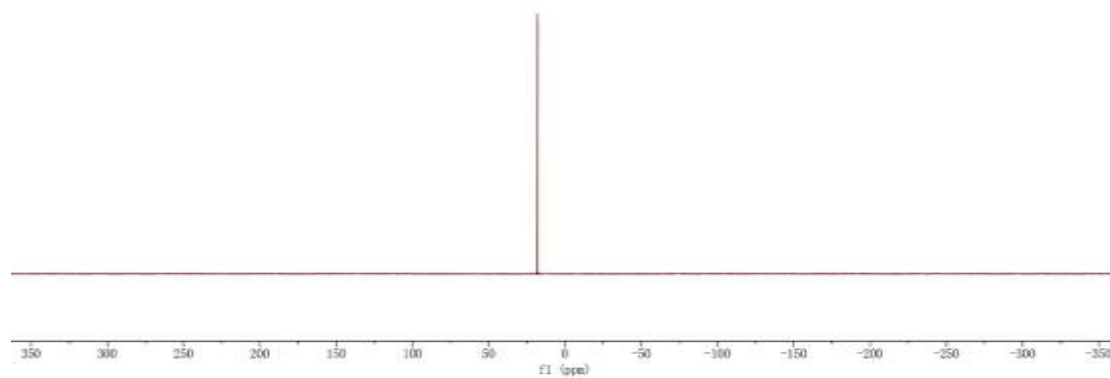

### Methyldiphenylphosphane borane (2a)

<sup>1</sup>H NMR (500 MHz, Chloroform-*d*)

7.69  
7.68  
7.68  
7.67  
7.67  
7.66  
7.65  
7.65  
7.50  
7.50  
7.49  
7.49  
7.48  
7.48  
7.47  
7.47  
7.47  
7.46  
7.46  
7.45  
7.44  
7.44  
7.43  
7.42  
7.42  
7.26

1.88  
1.86  
-1.31  
-1.13  
-0.93  
-0.76

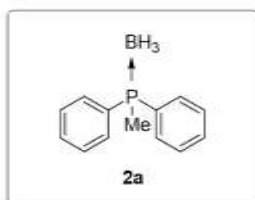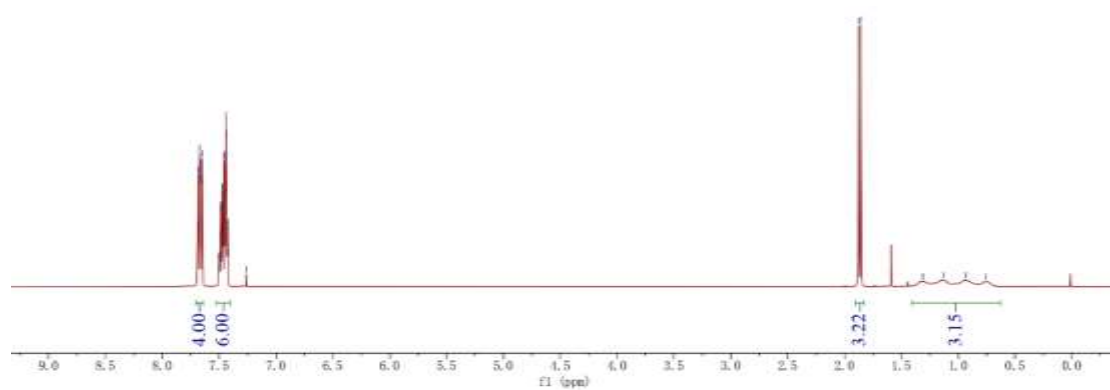

### Ethyldiphenylphosphane borane (2b)

<sup>1</sup>H NMR (400 MHz, Chloroform-*d*)

7.70  
7.70  
7.68  
7.68  
7.67  
7.67  
7.66  
7.65  
7.50  
7.50  
7.49  
7.48  
7.48  
7.47  
7.47  
7.46  
7.46  
7.45  
7.45  
7.44  
7.43  
7.43  
7.42  
7.42  
7.41  
7.26

2.29  
2.27  
2.26  
2.25  
2.24  
2.23  
2.22  
2.20  
1.34  
1.19  
1.17  
1.15  
1.13  
1.10  
0.86  
0.65

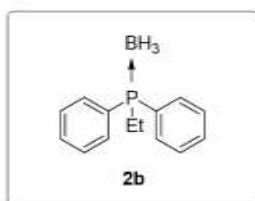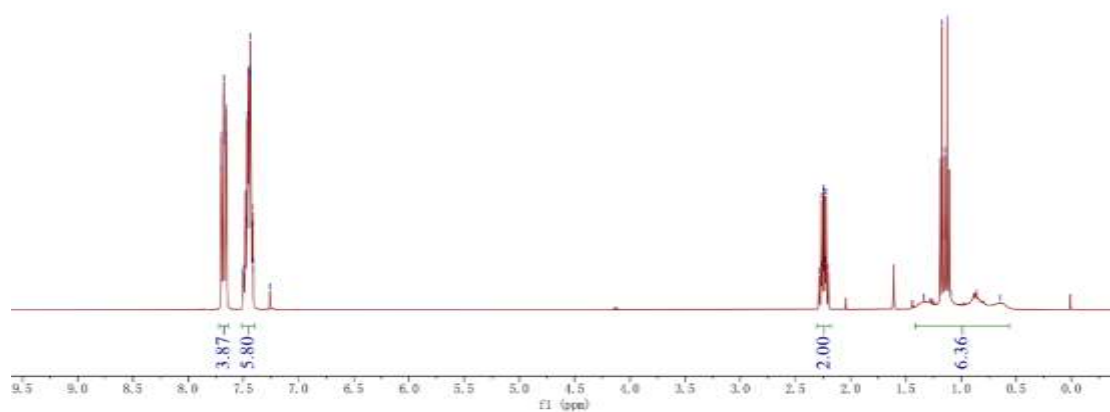

### Isopropyldiphenylphosphane borane (2c)

<sup>1</sup>H NMR (400 MHz, Chloroform-*d*)

7.78, 7.78, 7.77, 7.77, 7.76, 7.76, 7.75, 7.75, 7.74, 7.74, 7.73, 7.73, 7.49, 7.49, 7.49, 7.47, 7.47, 7.47, 7.46, 7.46, 7.46, 7.45, 7.45, 7.44, 7.44, 7.43, 7.42, 7.42, 7.41, 7.41, 7.26, 7.26, 2.79, 2.78, 2.78, 2.76, 2.74, 2.72, 2.70, 2.69, 2.67, 2.65, 1.28, 1.19, 1.18, 1.15, 1.14, 1.09, 0.81, 0.60

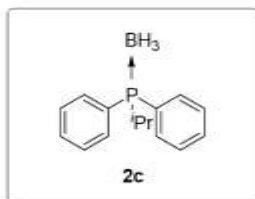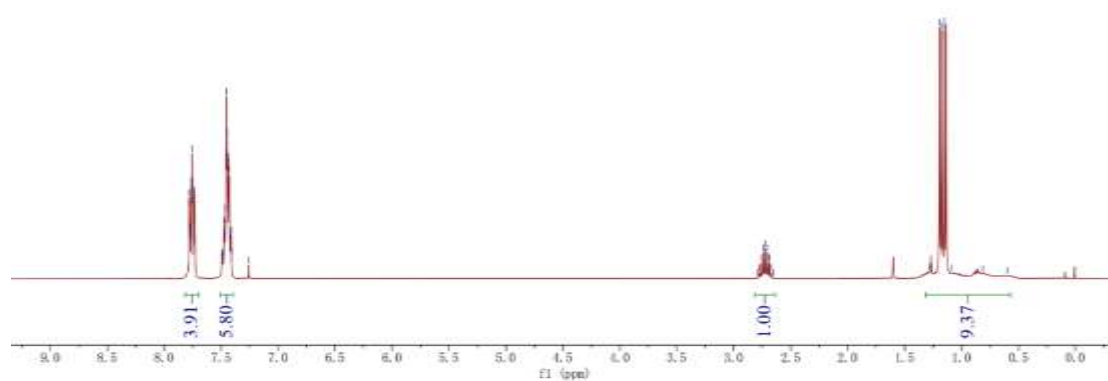

### Dimethyl(phenyl)phosphane borane (2d)

<sup>1</sup>H NMR (500 MHz, Chloroform-*d*)

7.75, 7.74, 7.74, 7.74, 7.73, 7.73, 7.72, 7.72, 7.72, 7.71, 7.71, 7.70, 7.70, 7.51, 7.51, 7.51, 7.50, 7.50, 7.49, 7.49, 7.49, 7.48, 7.48, 7.48, 7.48, 7.47, 7.47, 7.47, 7.46, 7.46, 7.46, 7.46, 7.45, 7.45, 7.45, 7.44, 7.44, 7.26, 1.57, 1.55, 1.08, 1.04, 0.89, 0.85, 0.69, 0.66, 0.50, 0.47

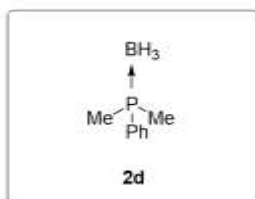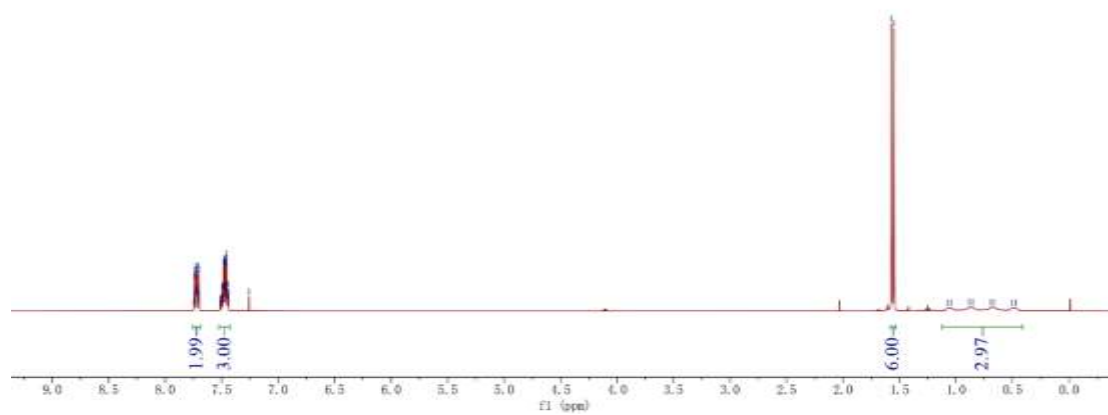

### Diethyl(phenyl)phosphane borane (2e)

<sup>1</sup>H NMR (500 MHz, Chloroform-*d*)

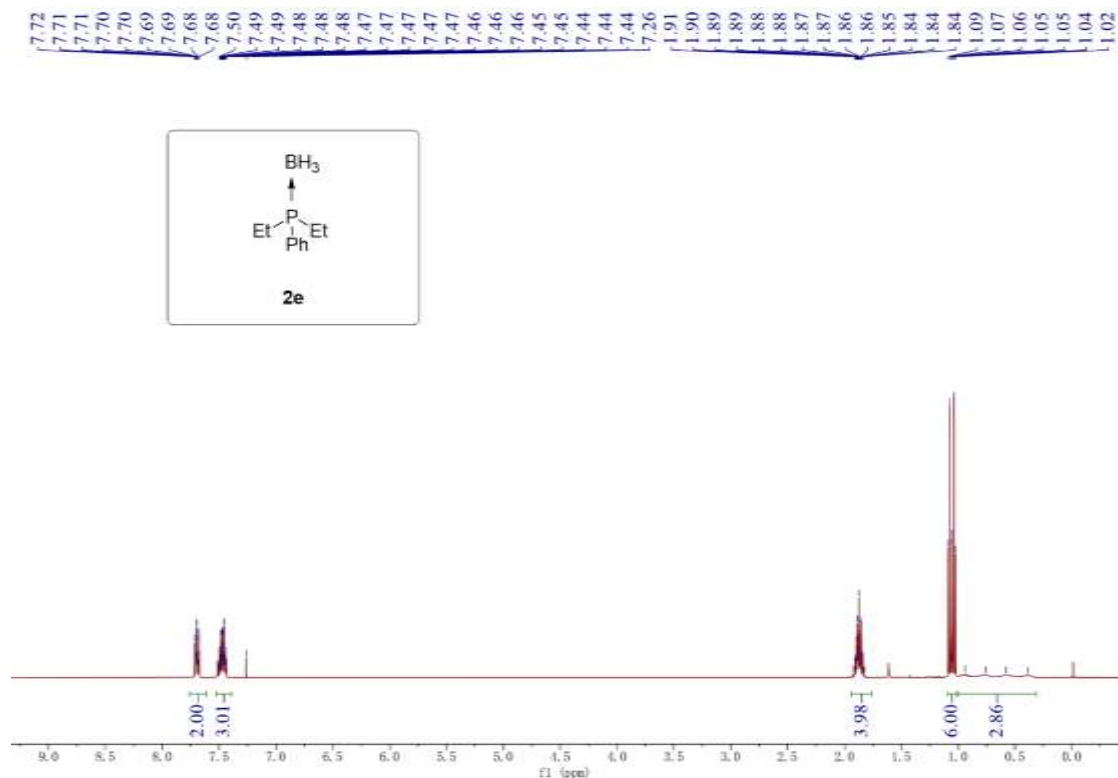

### Dicyclohexyl(phenyl)phosphane borane (2f)

<sup>1</sup>H NMR (400 MHz, Chloroform-*d*)

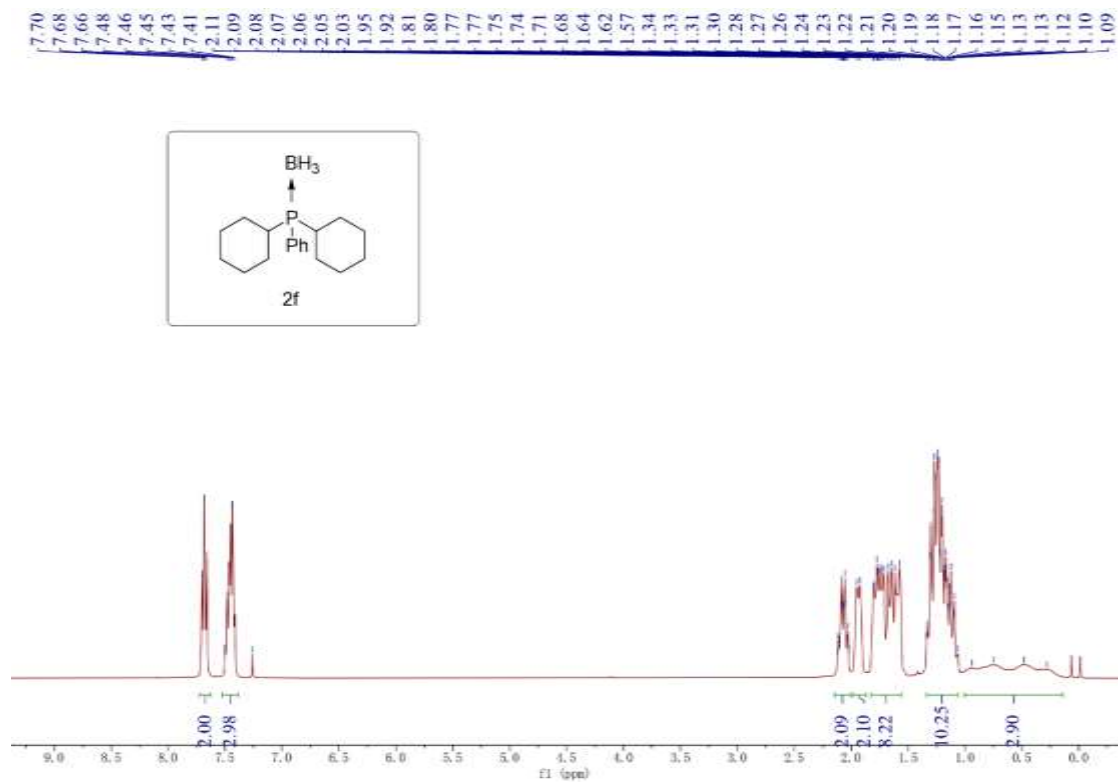

**Trimethylphosphane borane (2g)**

**<sup>1</sup>H NMR (500 MHz, Chloroform-*d*)**

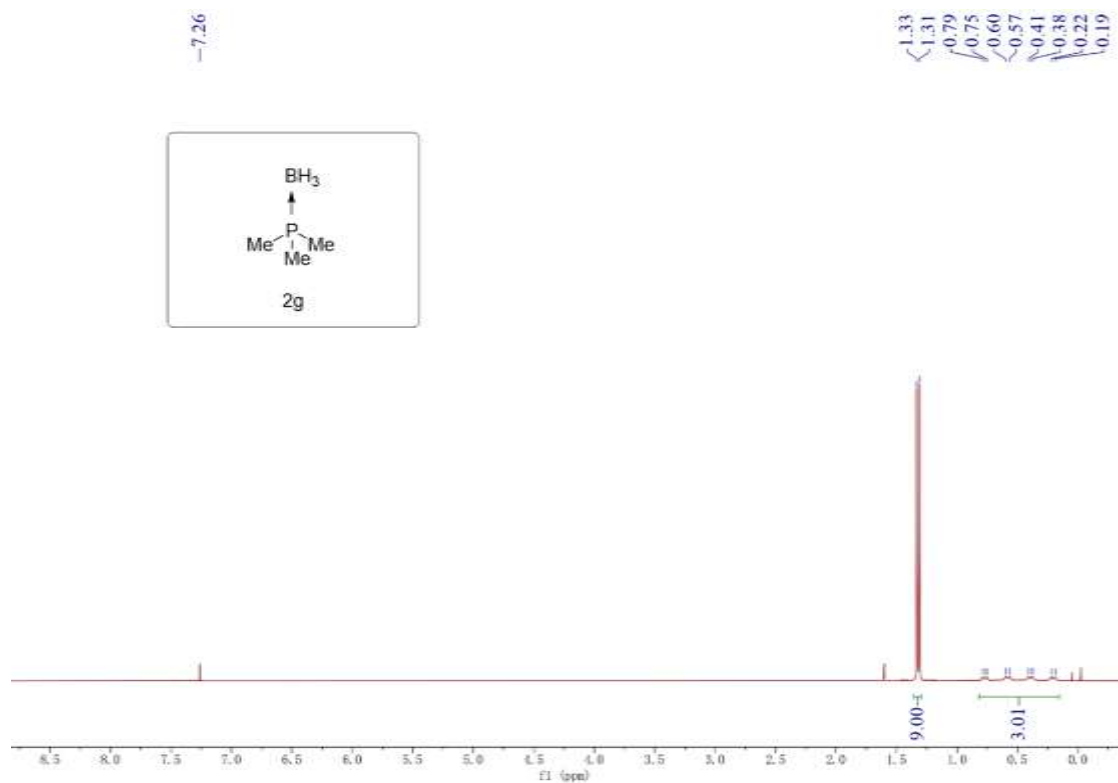

**Tributylphosphane borane (2h)**

**<sup>1</sup>H NMR (500 MHz, Chloroform-*d*)**

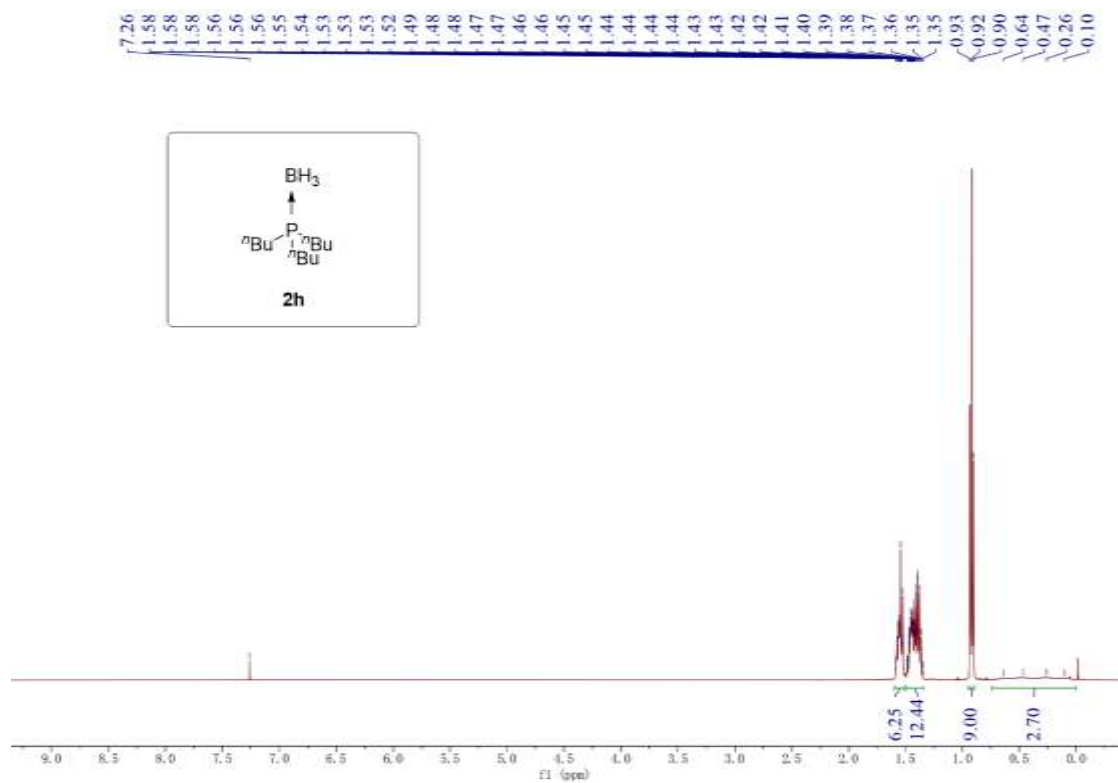



### Trimethylphosphite borane (2i)

<sup>1</sup>H NMR (500 MHz, Chloroform-*d*)

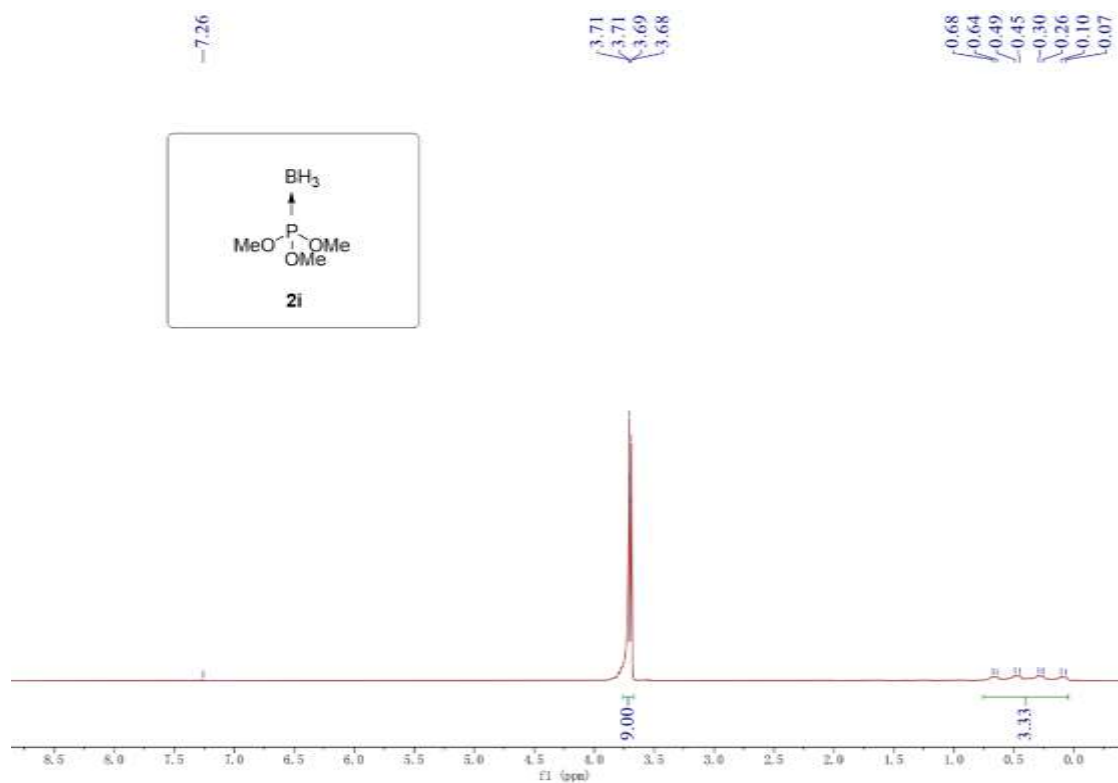

### (S)-dimethyl(((methylphenylphosphane)boryl)(phenyl)methyl)phosphonate(3aa)

<sup>1</sup>H NMR (500 MHz, Chloroform-*d*)

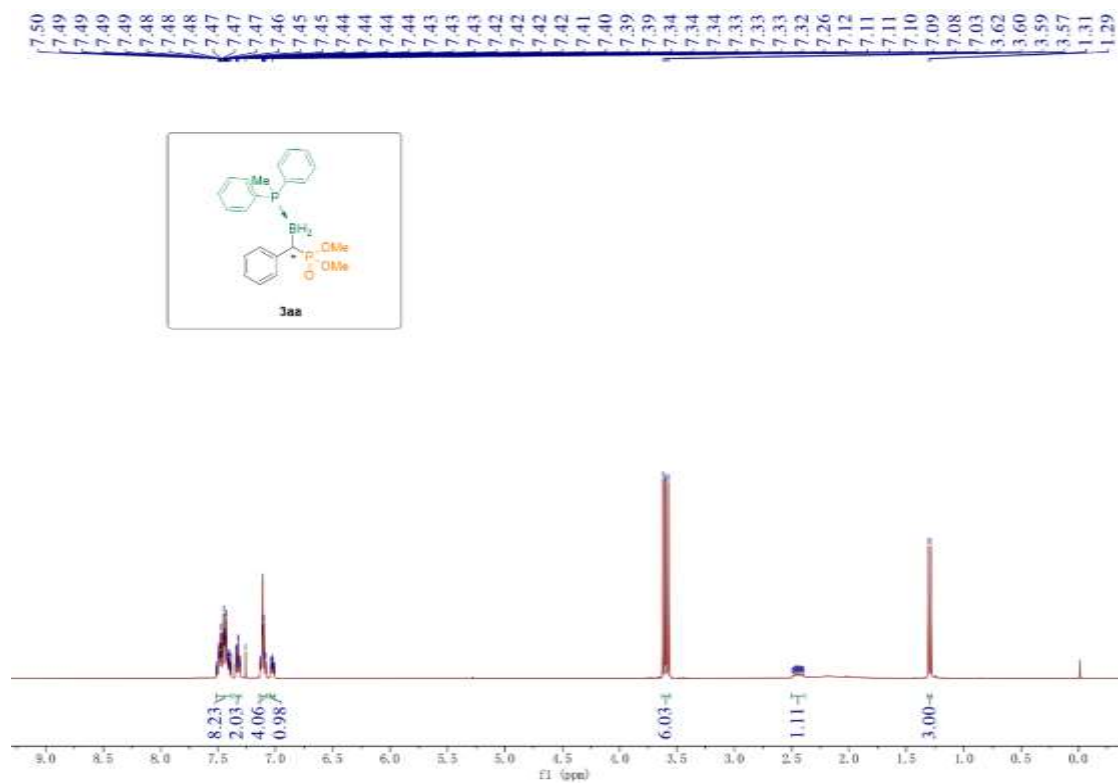

**<sup>13</sup>C NMR (126 MHz, Chloroform-*d*)**

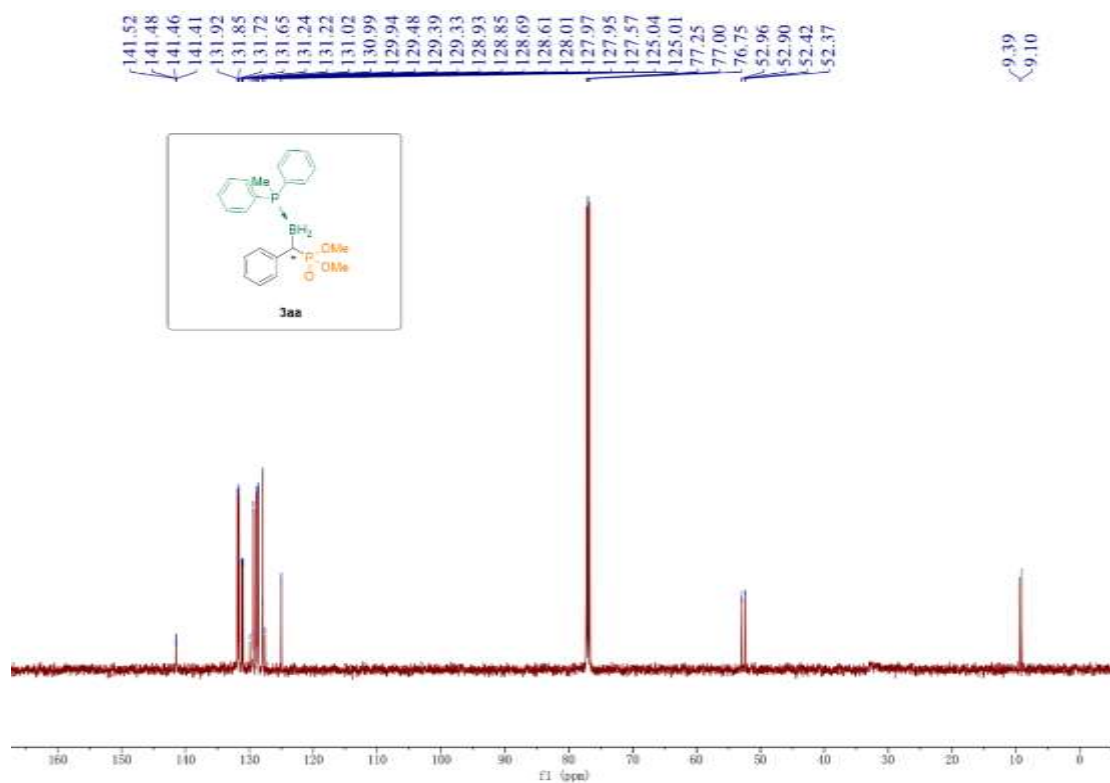

**<sup>11</sup>B NMR (160 MHz, Chloroform-*d*)**

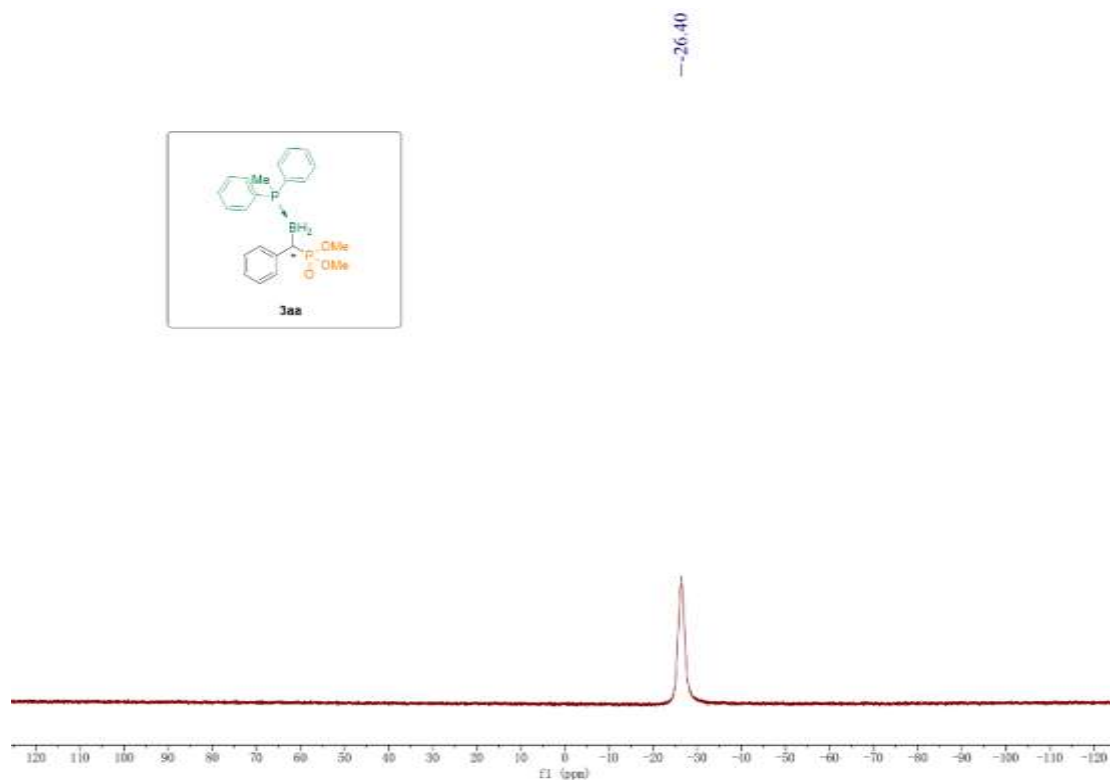

**<sup>31</sup>P NMR (202 MHz, Chloroform-*d*)**

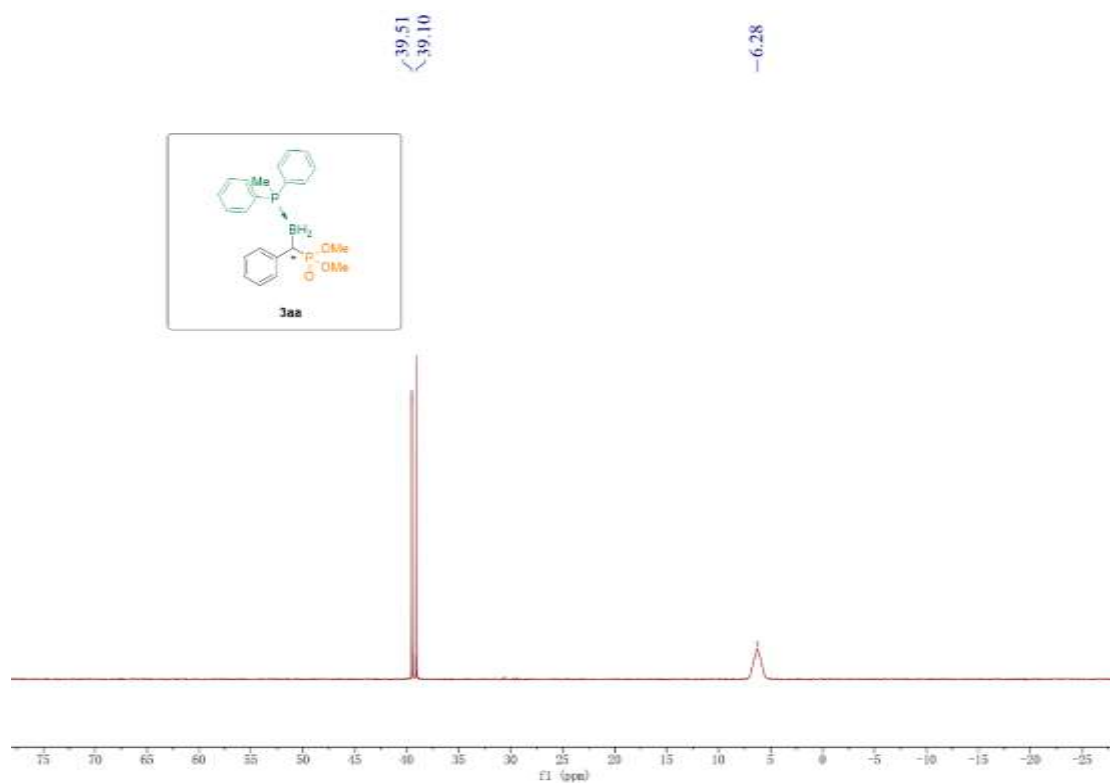

**(S)-dimethyl(((methylphenylphosphane)boryl)(4-chlorophenyl)methyl)phosphonate(3ba)**

**<sup>1</sup>H NMR (500 MHz, Chloroform-*d*)**

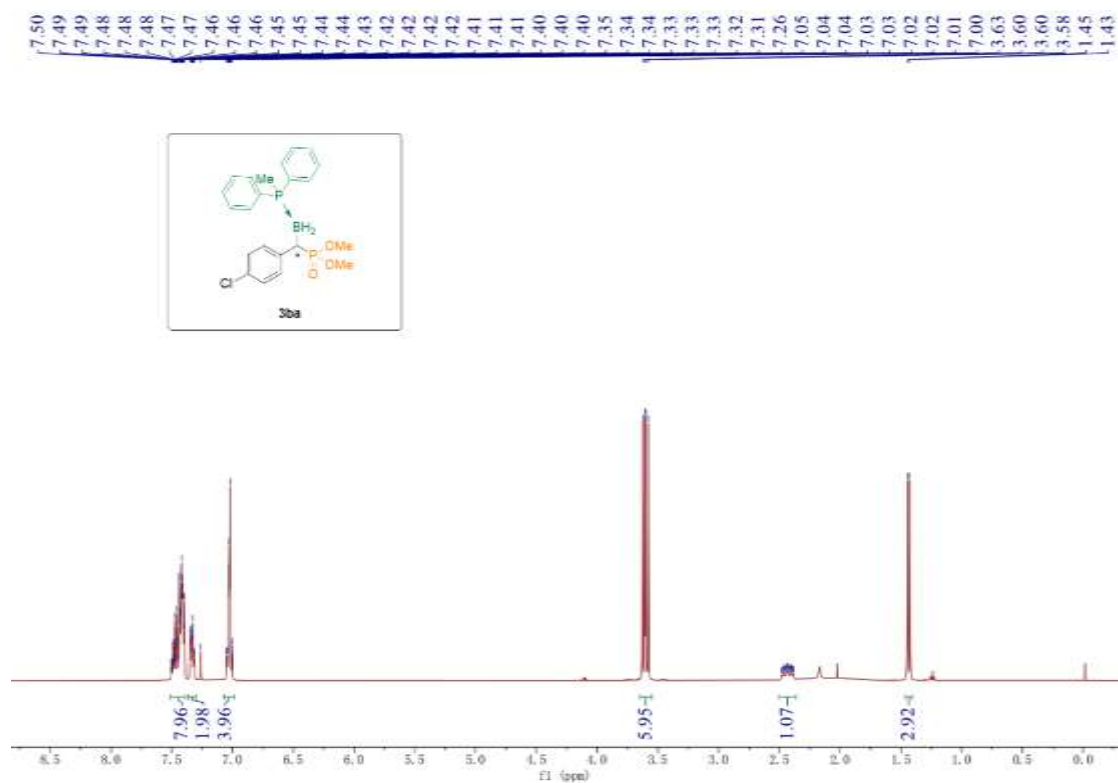

**<sup>13</sup>C NMR (126 MHz, Chloroform-*d*)**

140.23  
140.18  
140.16  
140.12  
131.85  
131.78  
131.66  
131.59  
131.29  
131.27  
131.07  
131.05  
130.64  
130.58  
130.55  
130.51  
129.36  
128.95  
128.90  
128.87  
128.75  
128.67  
128.00  
127.95  
127.93  
127.56  
77.25  
77.00  
76.75  
52.99  
52.93  
52.50  
52.44

9.64  
9.35

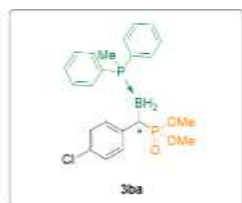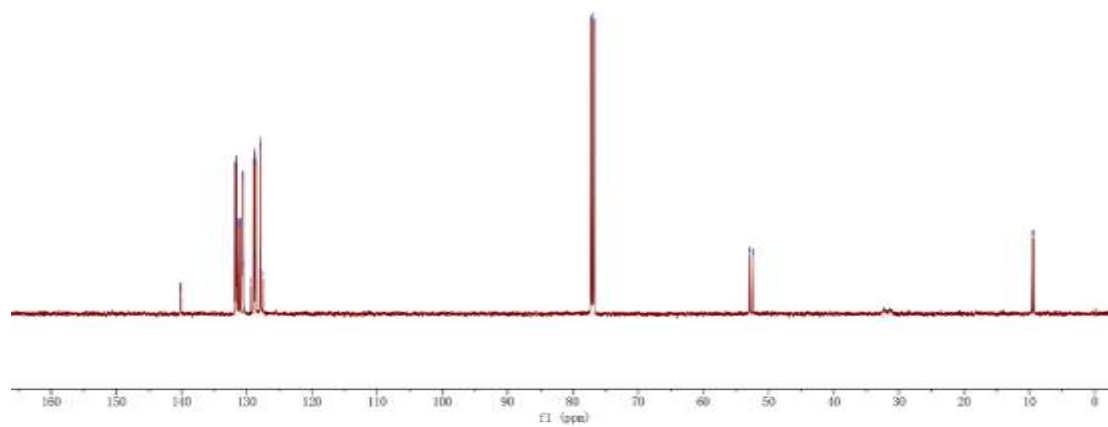

**<sup>11</sup>B NMR (160 MHz, Chloroform-*d*)**

-26.85

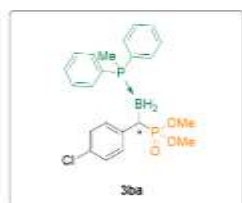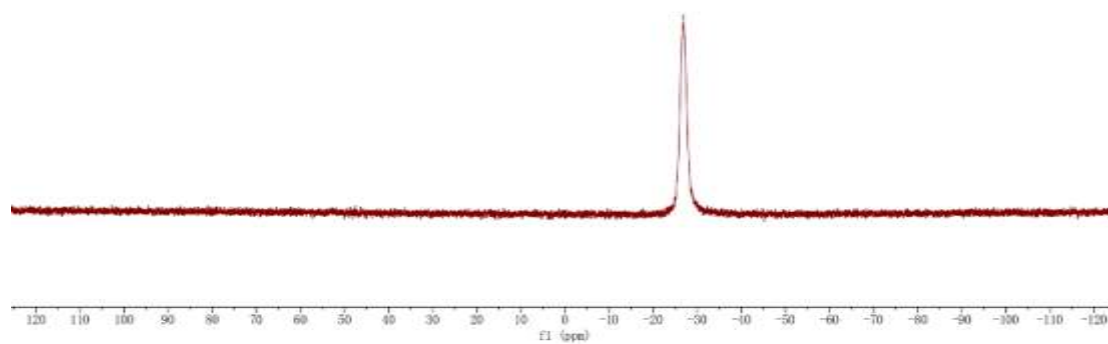

**<sup>31</sup>P NMR (202 MHz, Chloroform-*d*)**

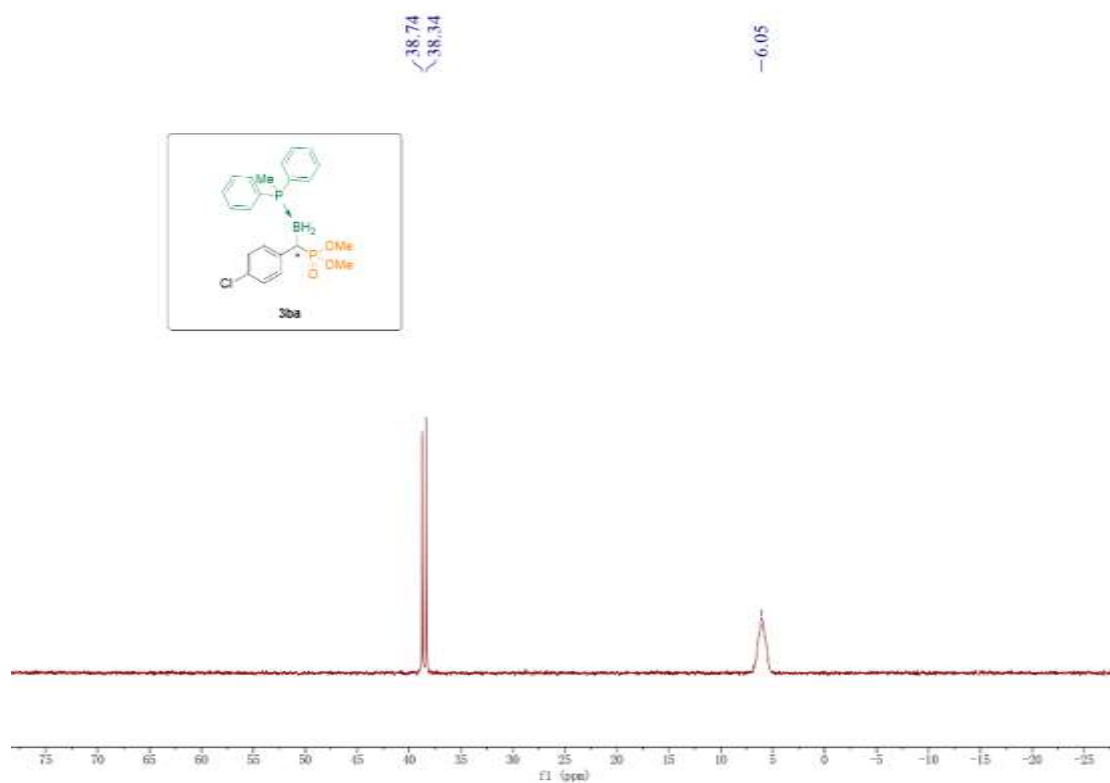

**(S)-dimethyl(((methylphenylphosphane)boryl)(4-(hydroxymethyl)phenyl)methyl)phosphonate(3ca)**

**<sup>1</sup>H NMR (400 MHz, Chloroform-*d*)**

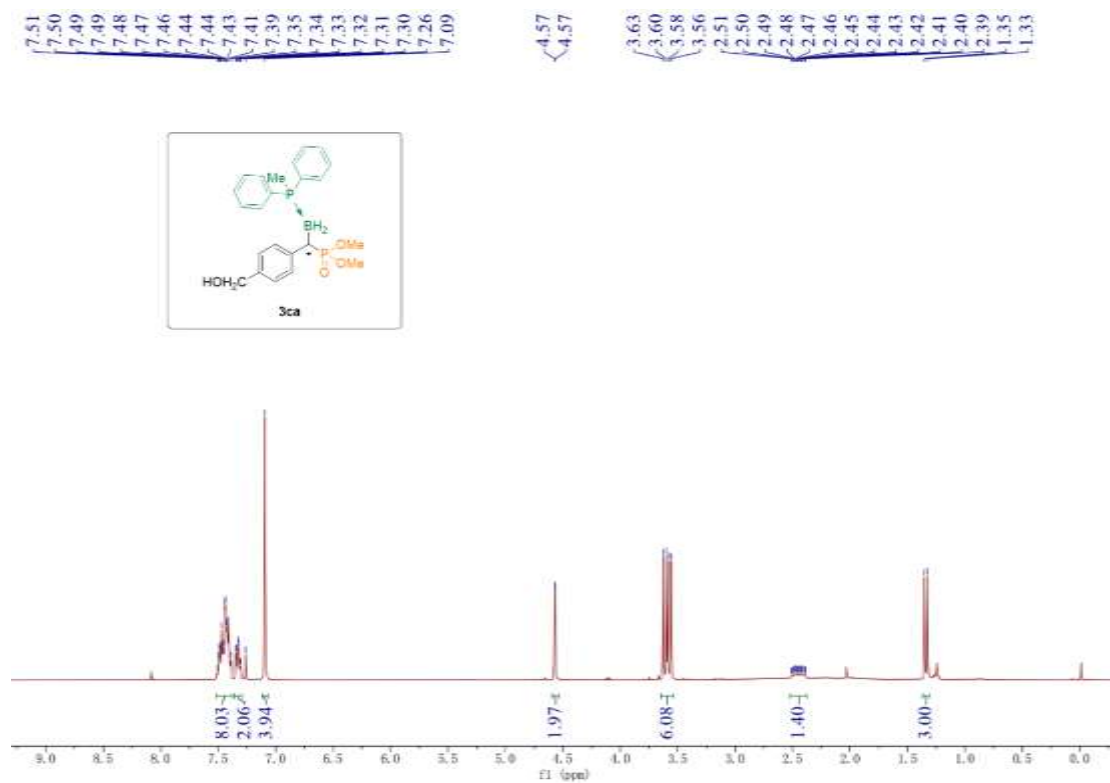

**$^{13}\text{C}$  NMR (126 MHz, Chloroform-*d*)**

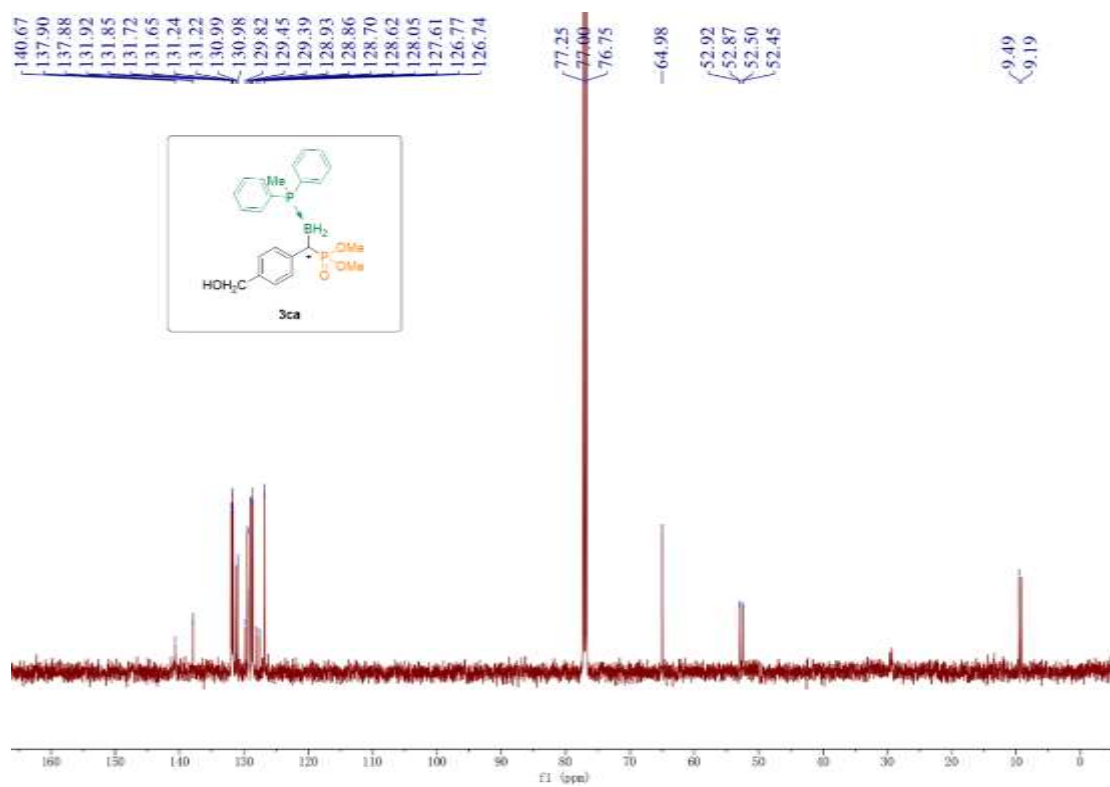

**$^{11}\text{B}$  NMR (128 MHz, Chloroform-*d*)**

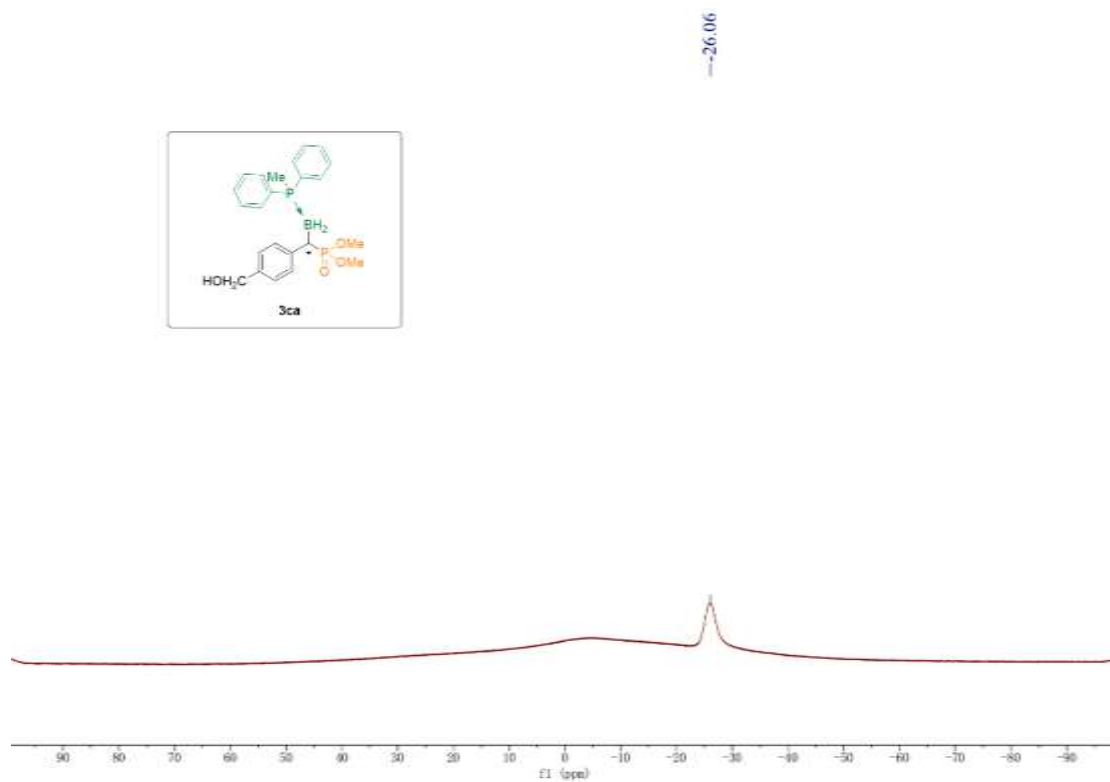

**<sup>31</sup>P NMR (162 MHz, Chloroform-*d*)**

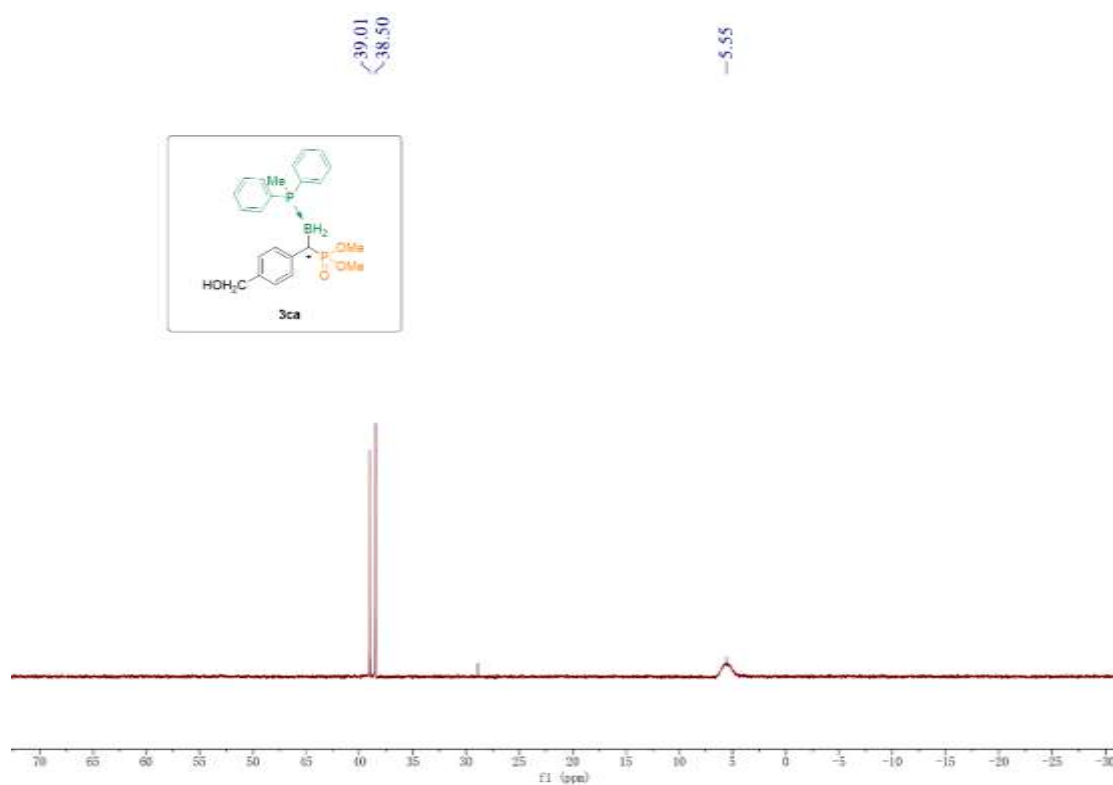

**(S)-dimethyl(((methyl)phenylphosphane)boryl)(4-methoxyphenyl)methyl)phosphonate(3da)**

**<sup>1</sup>H NMR (400 MHz, Chloroform-*d*)**

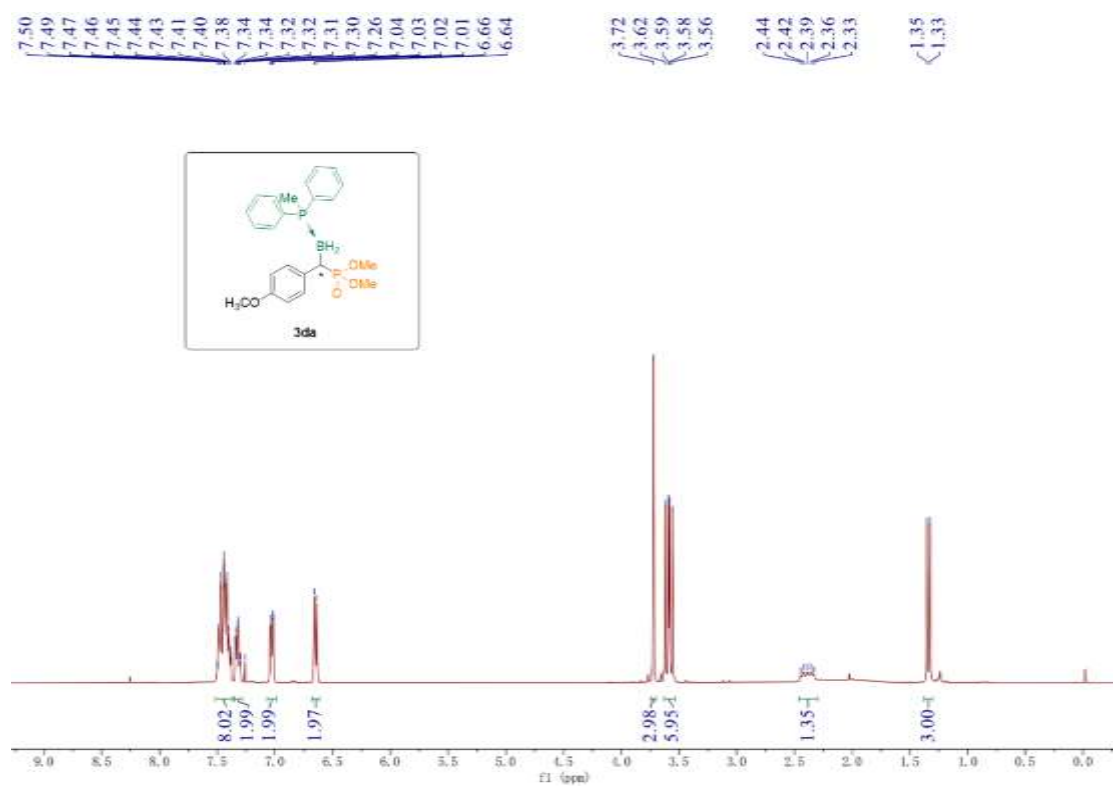

**$^{13}\text{C}$  NMR (101 MHz, Chloroform-*d*)**

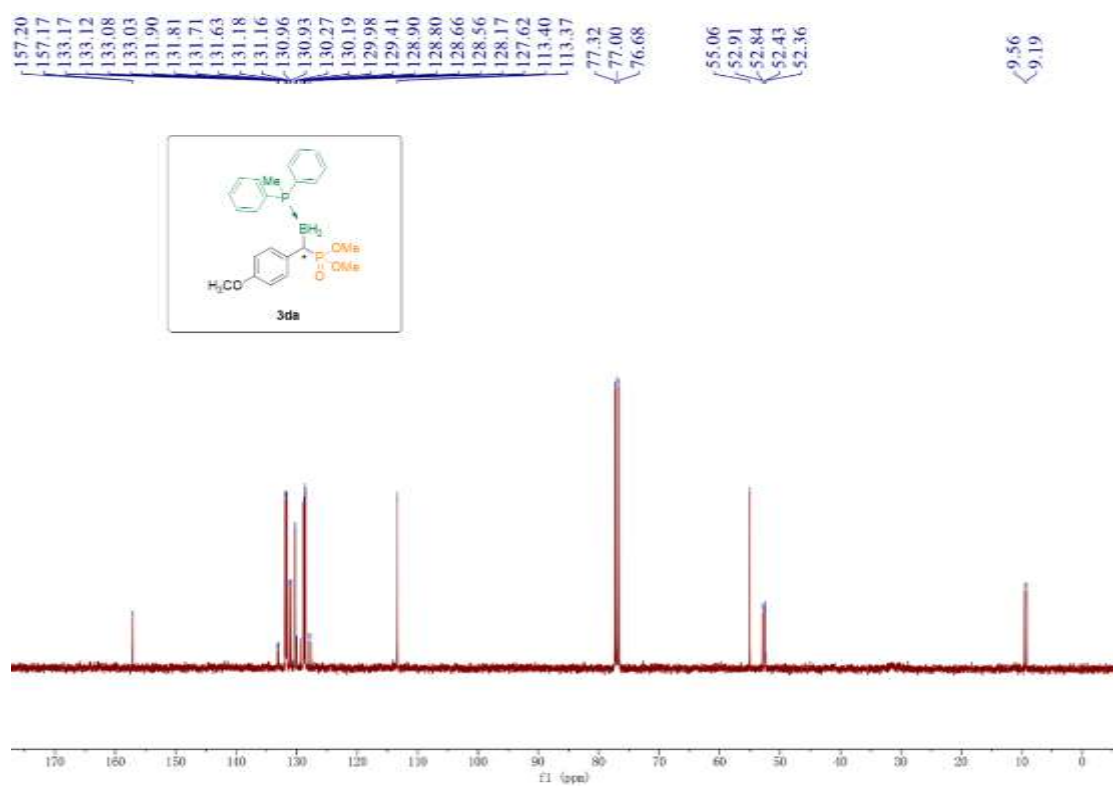

**$^{11}\text{B}$  NMR (128 MHz, Chloroform-*d*)**

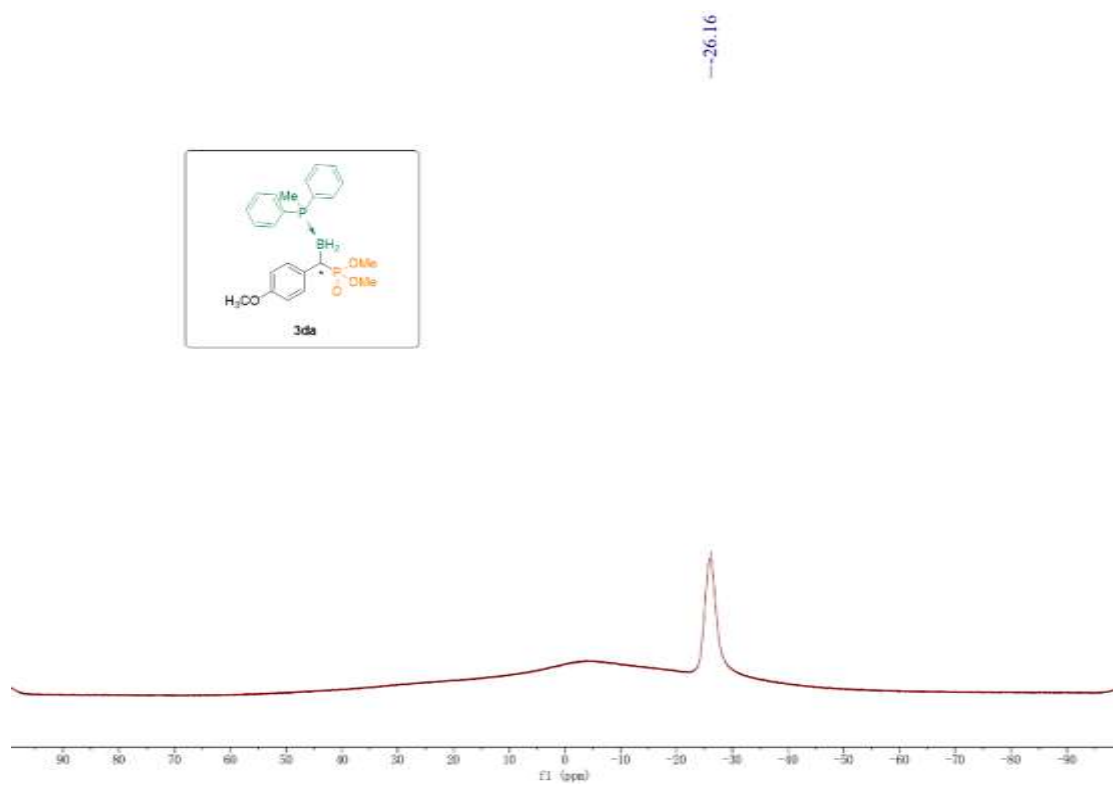



**<sup>31</sup>P NMR (162 MHz, Chloroform-*d*)**

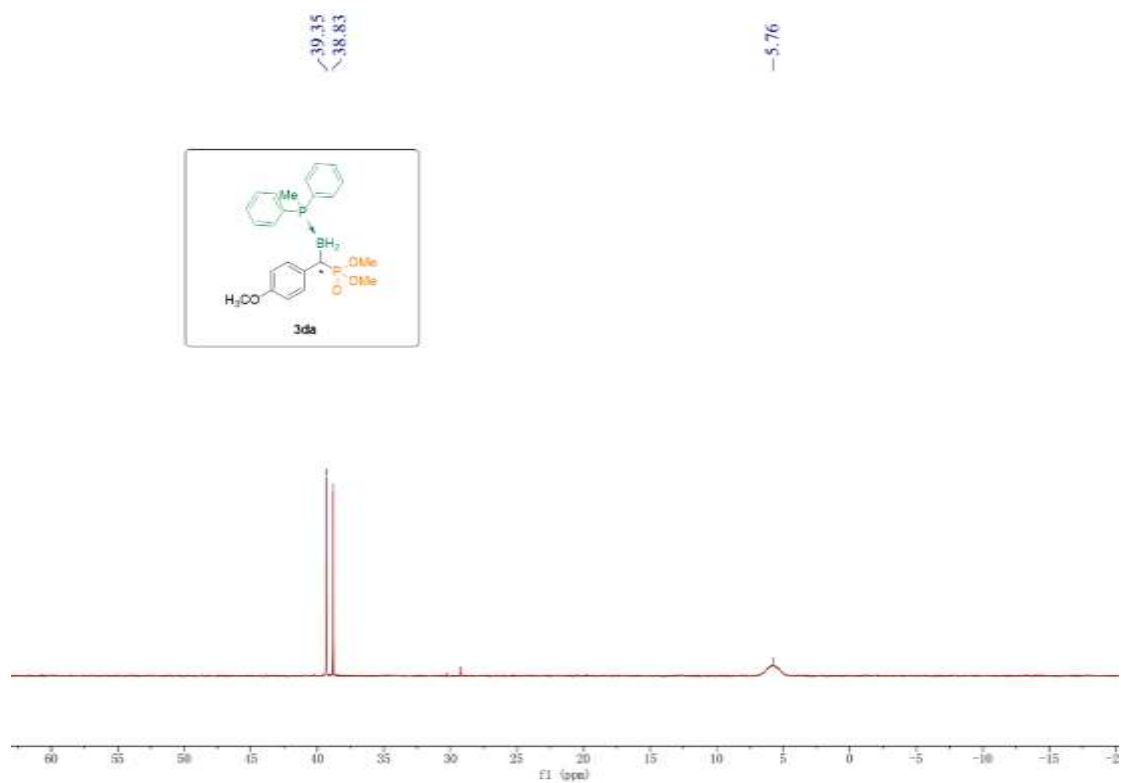

**(S)-dimethyl(((methyl)phenylphosphane)boryl)(p-tolyl)methylphosphonate(3ea)**

**<sup>1</sup>H NMR (500 MHz, Chloroform-*d*)**

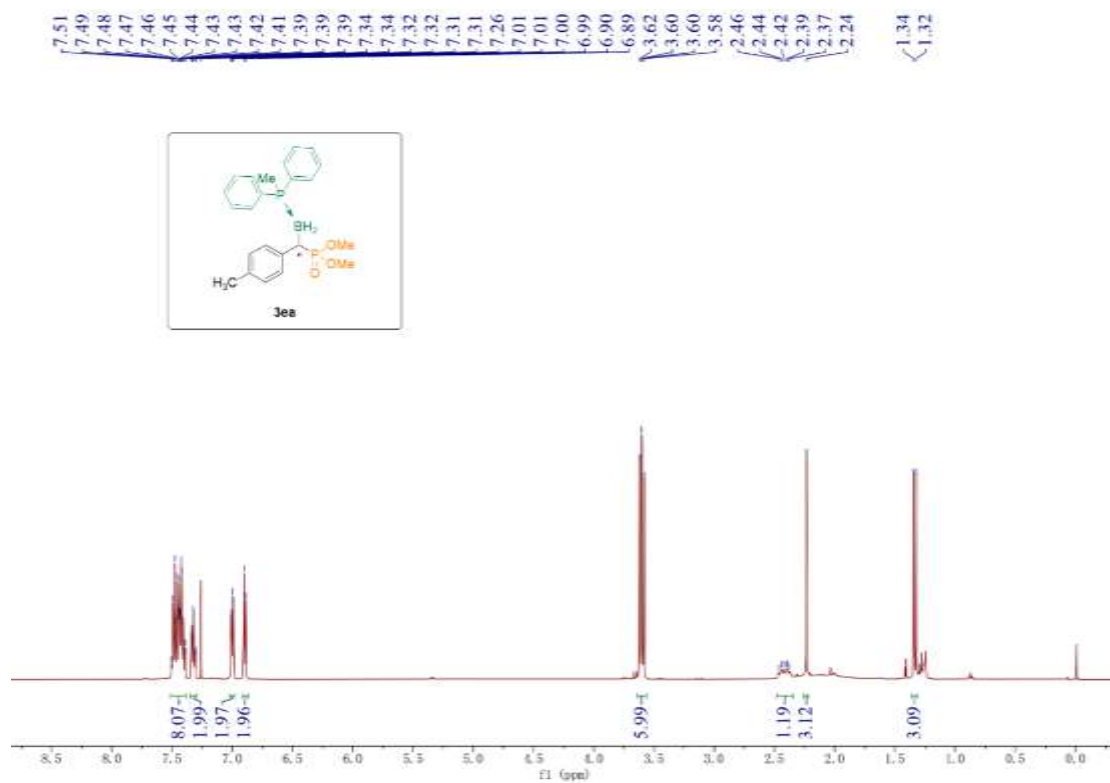

**<sup>13</sup>C NMR (126 MHz, Chloroform-*d*)**

138.20  
138.15  
138.13  
138.09  
134.32  
134.29  
131.95  
131.88  
131.74  
131.67  
131.15  
130.90  
129.99  
129.53  
129.23  
129.17  
128.89  
128.81  
128.66  
128.58  
128.19  
127.75

77.25  
77.00  
76.75

52.93  
52.88  
52.41  
52.36

-20.92

9.45  
9.16

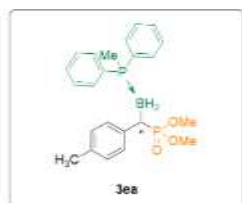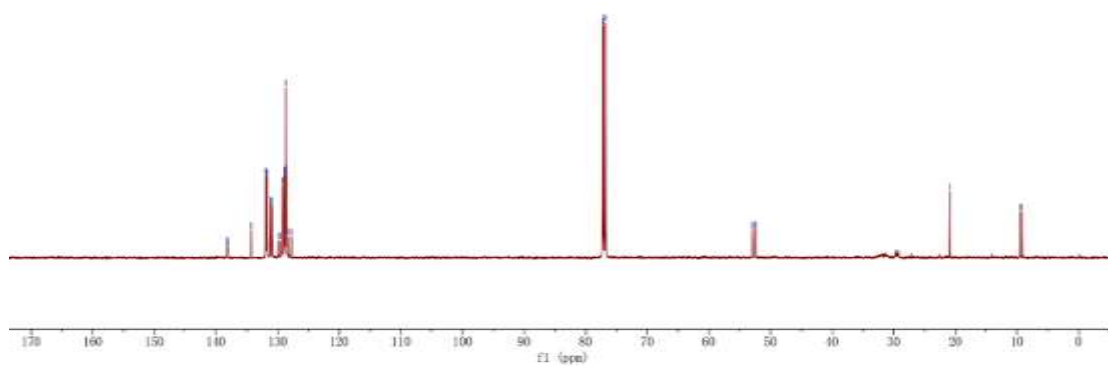

**<sup>11</sup>B NMR (128 MHz, Chloroform-*d*)**

-26.02

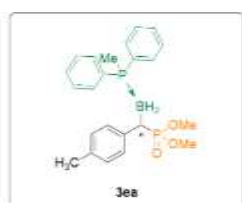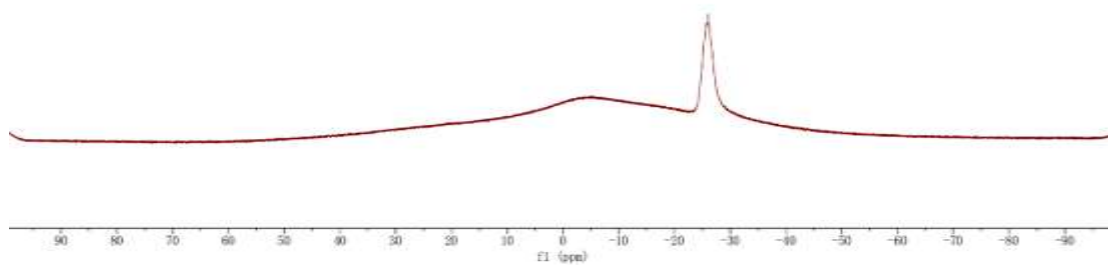

**<sup>31</sup>P NMR (202 MHz, Chloroform-*d*)**

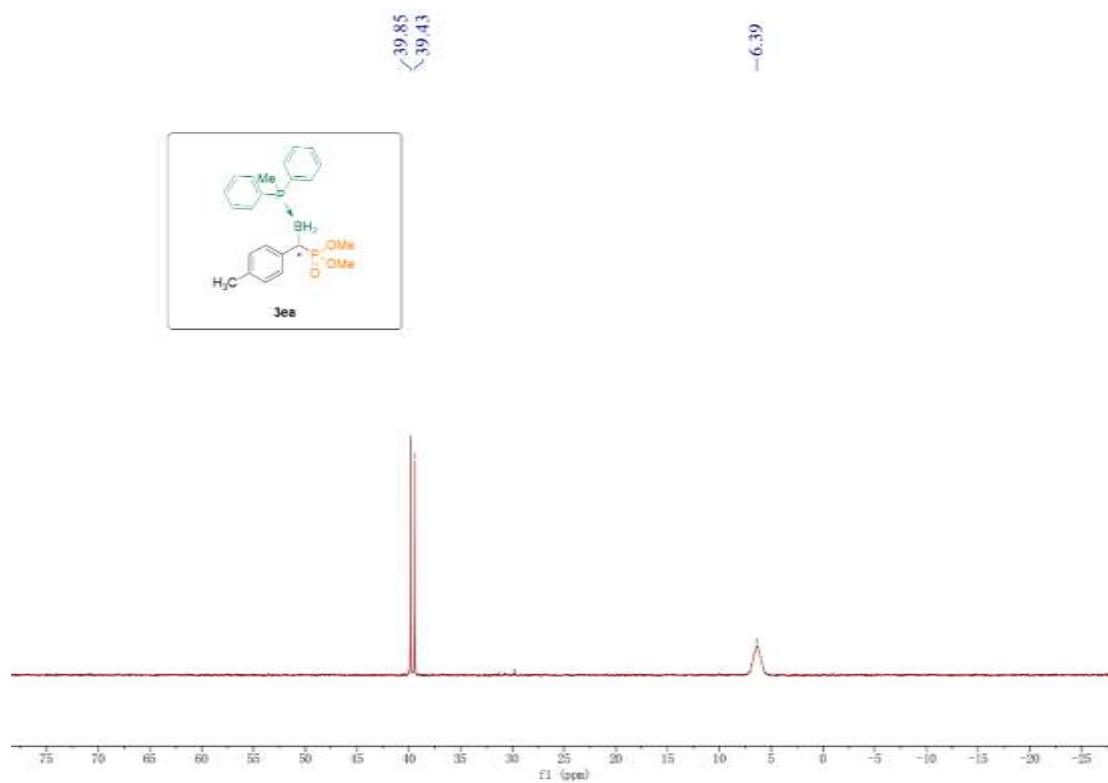

**(S)-dimethyl(((methylthio)diphenylphosphane)boryl)(4-(methylthio)methyl)phosphonate(3fa)**

**<sup>1</sup>H NMR (400 MHz, Chloroform-*d*)**

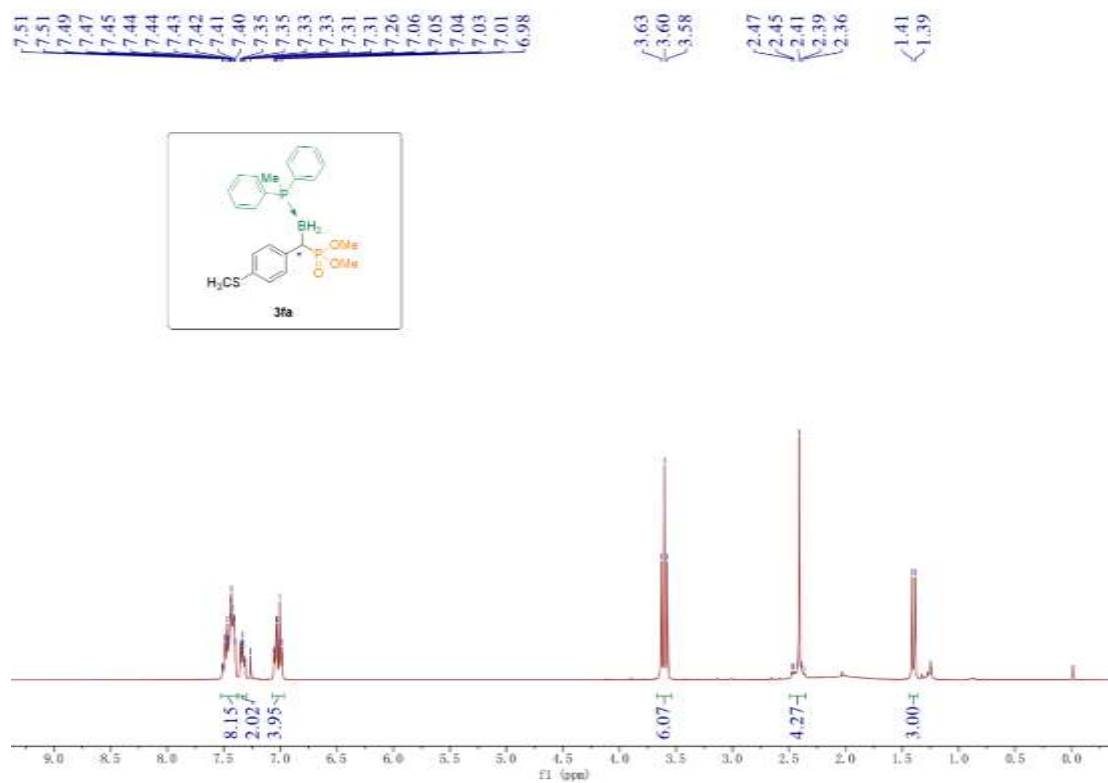

**<sup>13</sup>C NMR (101 MHz, Chloroform-*d*)**

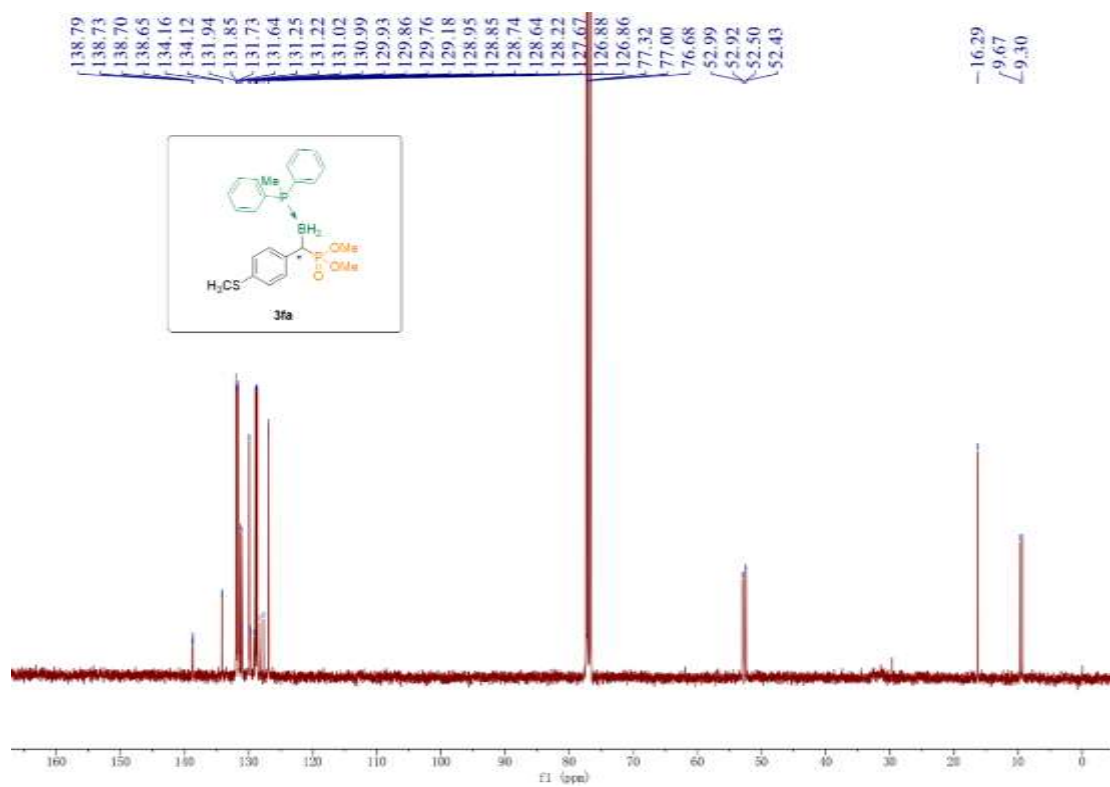

**<sup>11</sup>B NMR (128 MHz, Chloroform-*d*)**

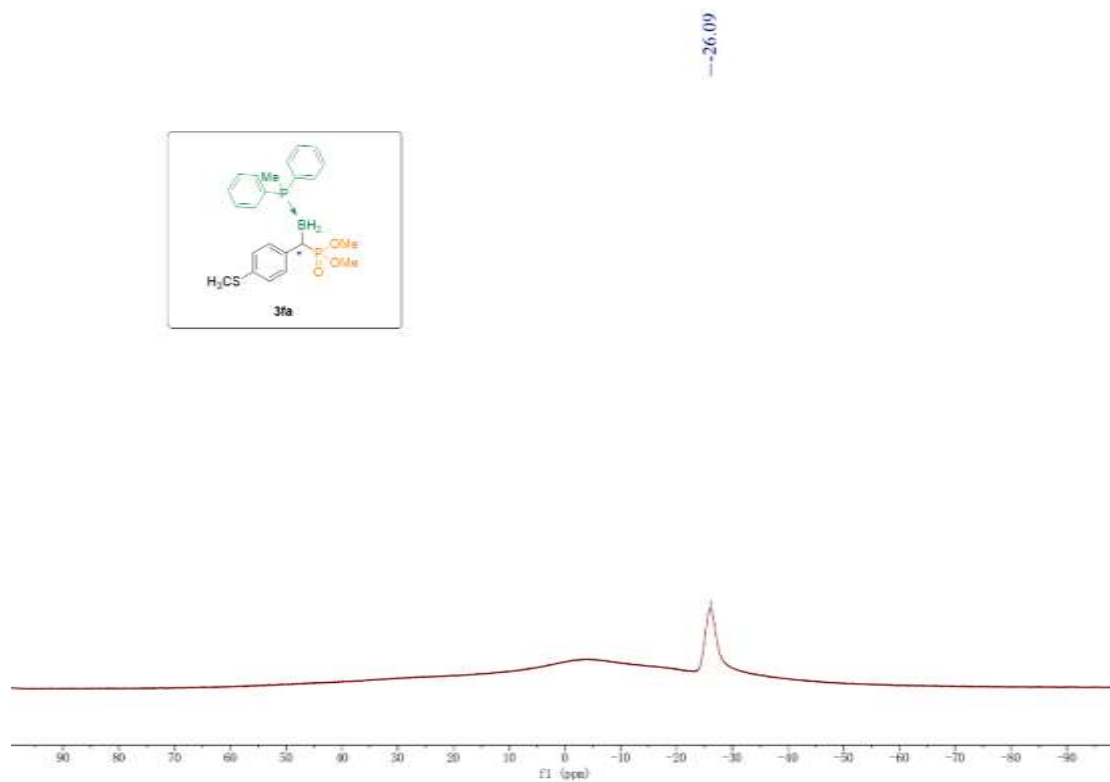

<sup>31</sup>P NMR (162 MHz, Chloroform-*d*)

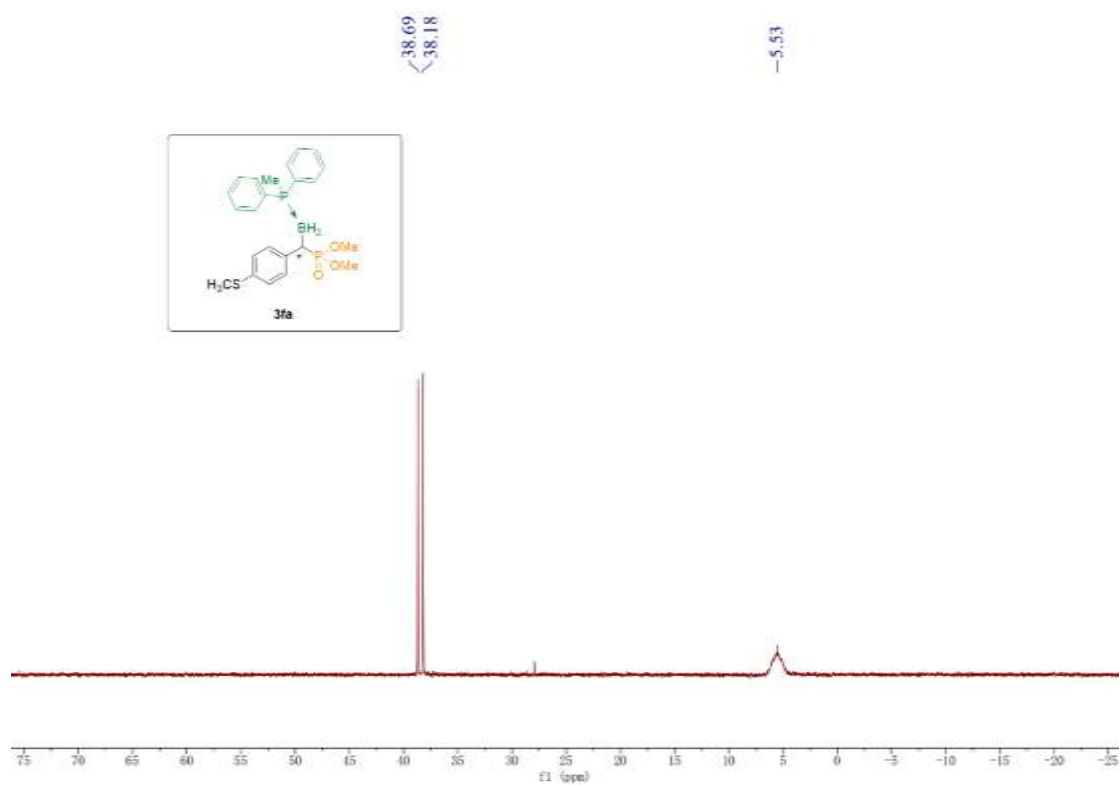

(S)-dimethyl(((methylphenylphosphane)boryl)(4-nitrophenyl)methyl)phosphonate(3ga)

<sup>1</sup>H NMR (500 MHz, Chloroform-*d*)

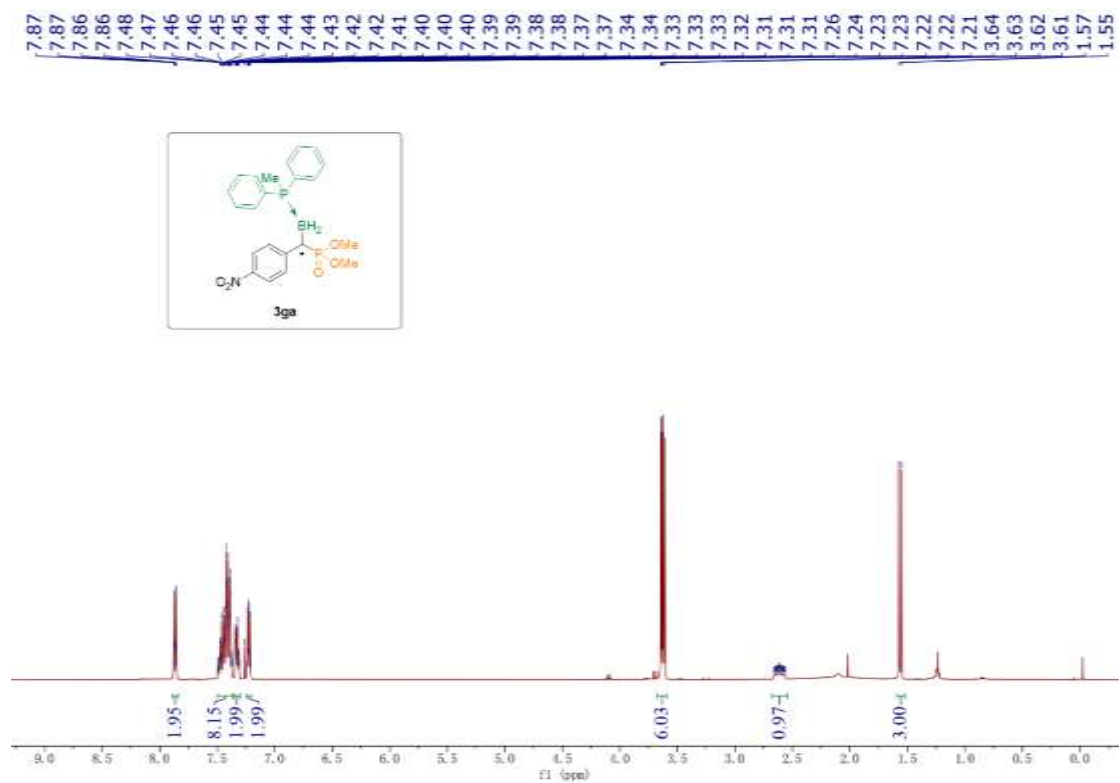

**<sup>13</sup>C NMR (126 MHz, Chloroform-*d*)**

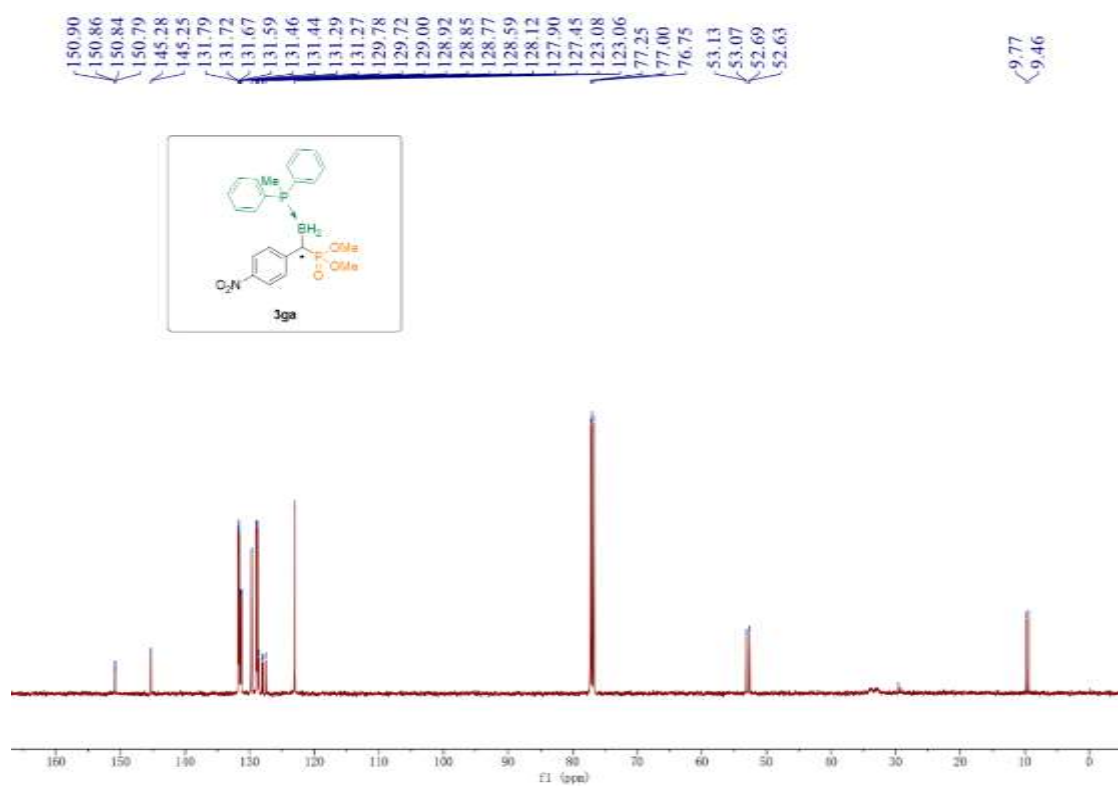

**<sup>11</sup>B NMR (160 MHz, Chloroform-*d*)**

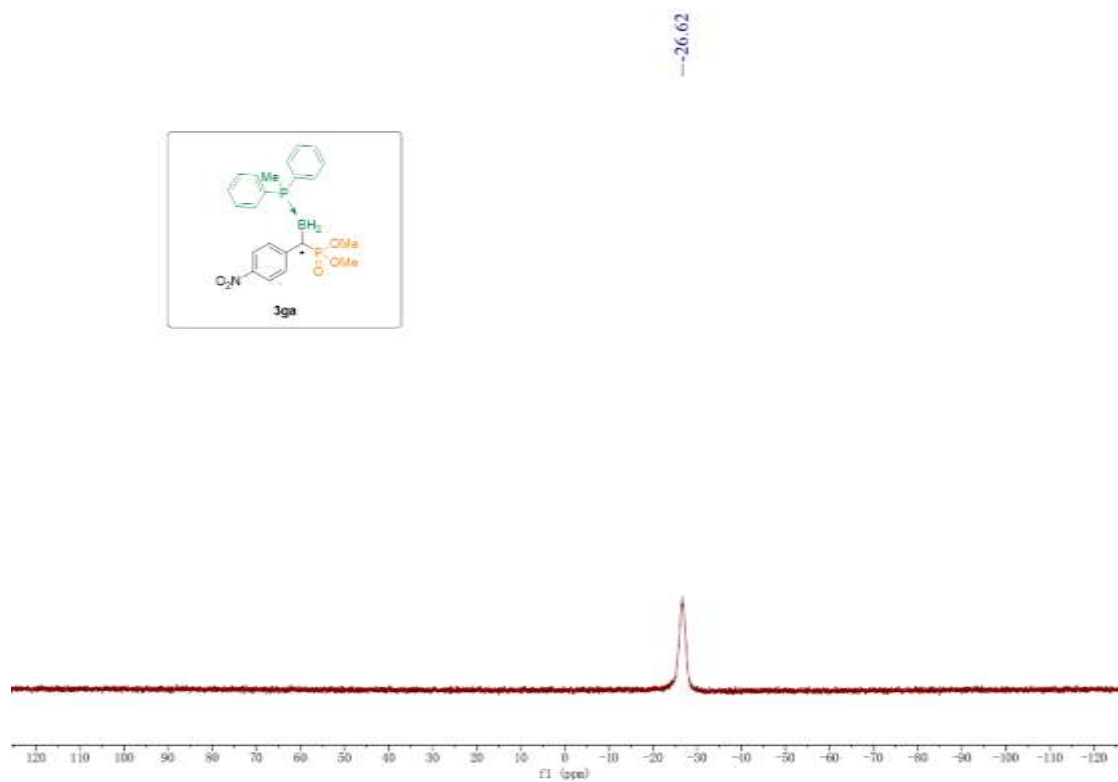

<sup>31</sup>P NMR (202 MHz, Chloroform-*d*)

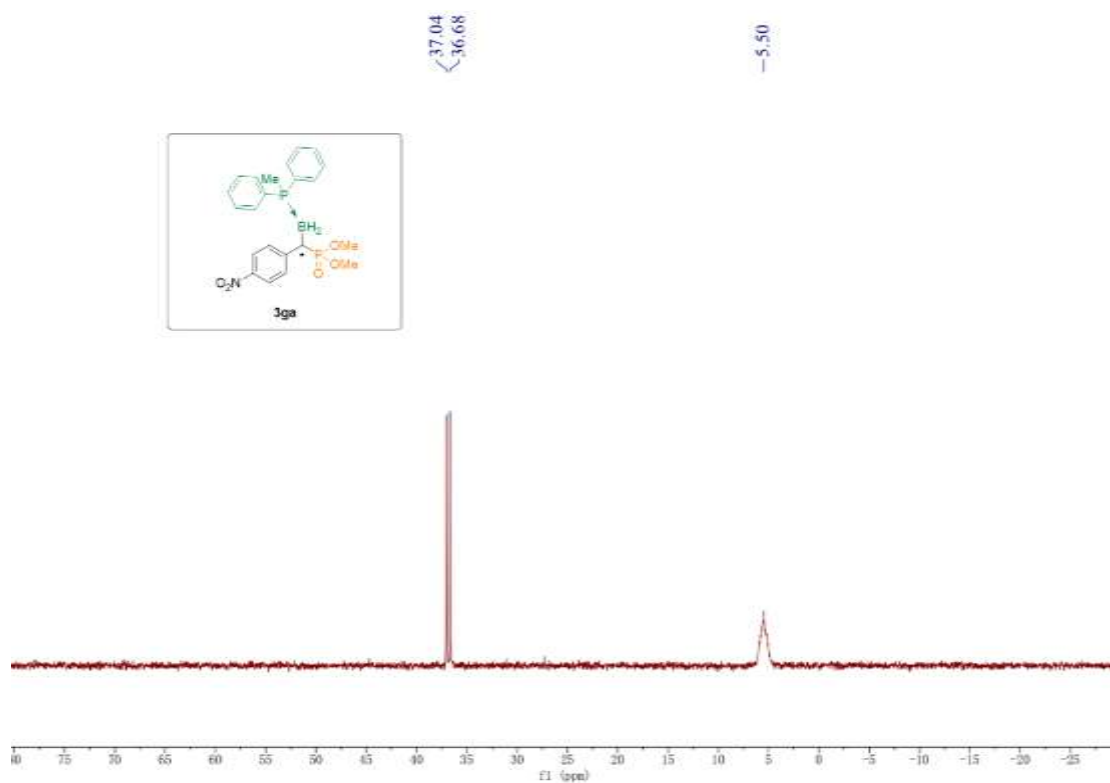

(*S*)-methyl-4-(((methyl-diphenylphosphane)boryl)(dimethoxyphosphoryl)methyl)benzoate (**3ha**)  
<sup>1</sup>H NMR (500 MHz, Chloroform-*d*)

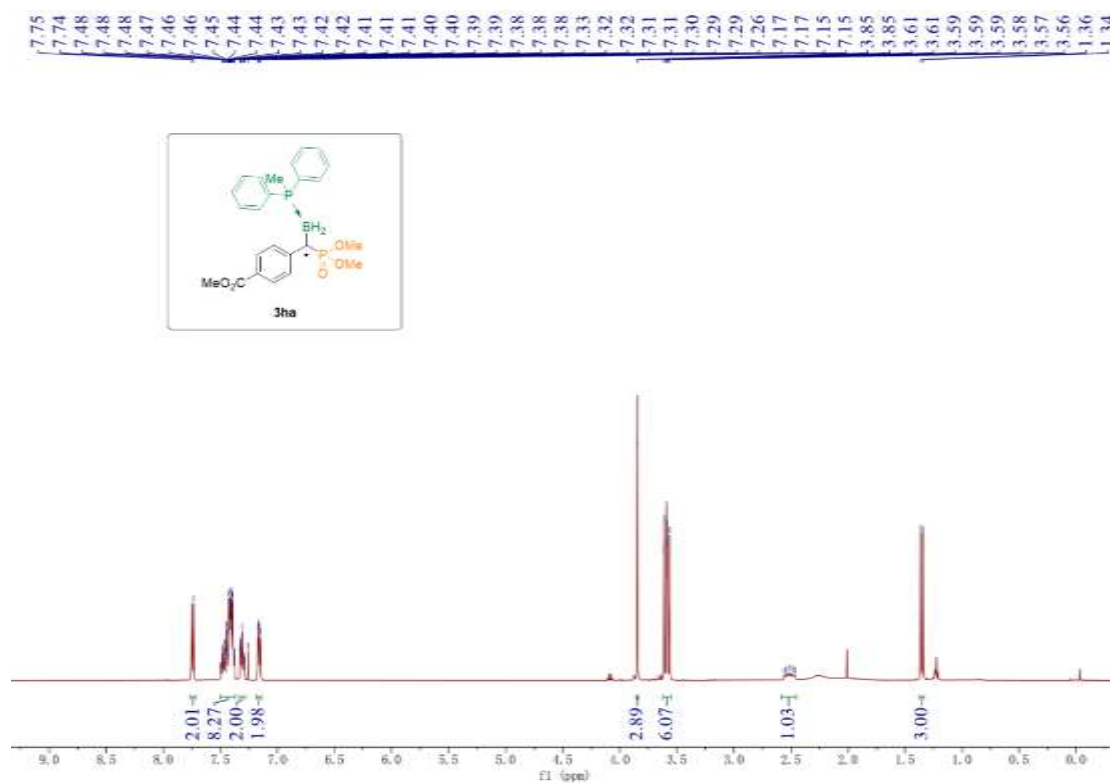

**$^{13}\text{C}$  NMR (126 MHz, Chloroform-*d*)**

167.16  
147.87  
147.83  
147.81  
147.76  
131.82  
131.74  
131.63  
131.56  
131.35  
131.33  
131.12  
131.10  
129.24  
129.18  
128.97  
128.89  
128.73  
128.65  
127.72  
127.27  
126.74  
126.72  
77.25  
77.00  
76.75  
53.03  
52.97  
52.52  
52.46  
51.77  
9.54  
9.24

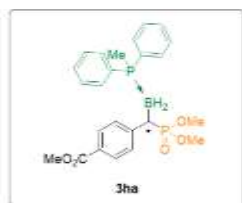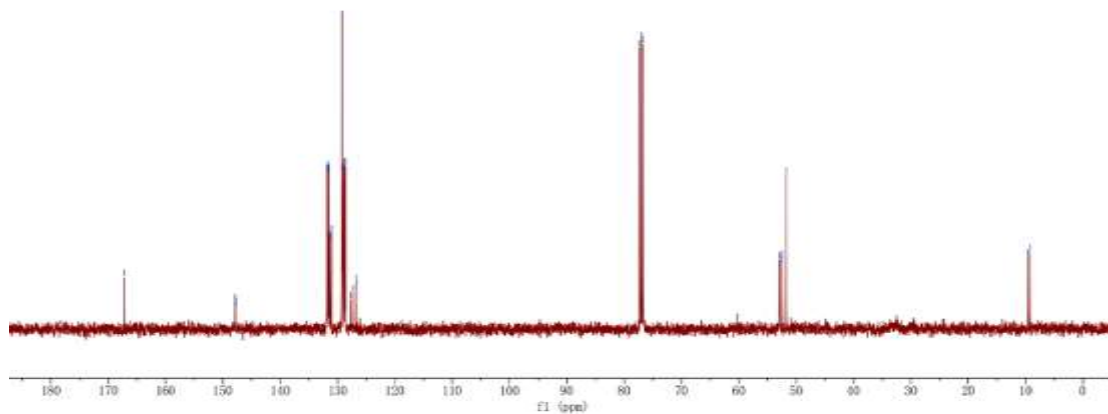

**$^{11}\text{B}$  NMR (160 MHz, Chloroform-*d*)**

-26.79

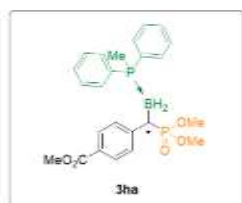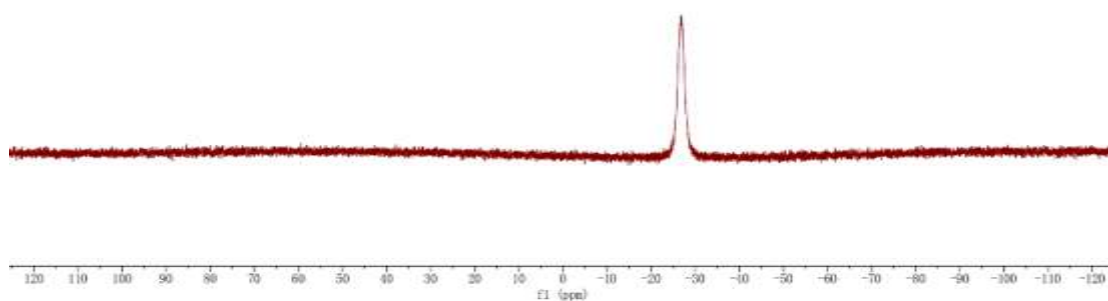



**<sup>31</sup>P NMR (202 MHz, Chloroform-*d*)**

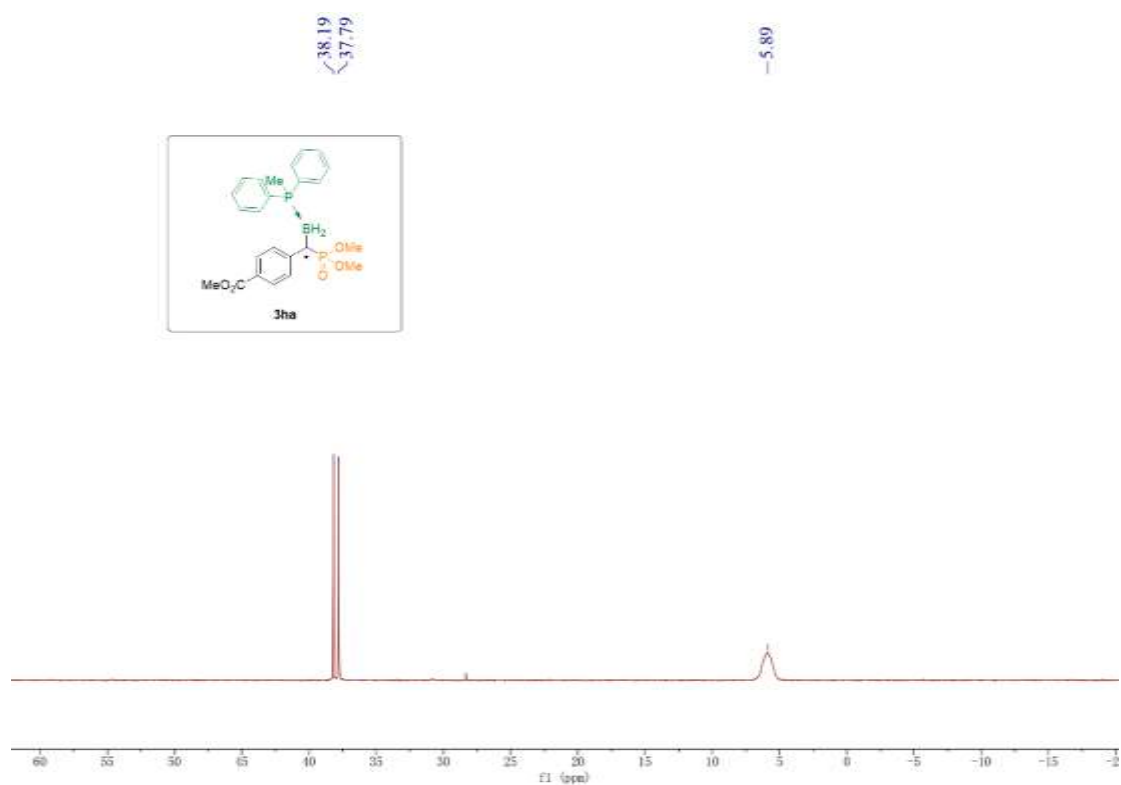

**(S)-dimethyl(((methylphenylphosphane)boryl)(4-fluorophenyl)methyl)phosphonate(**3ia**)**

**<sup>1</sup>H NMR (400 MHz, Chloroform-*d*)**

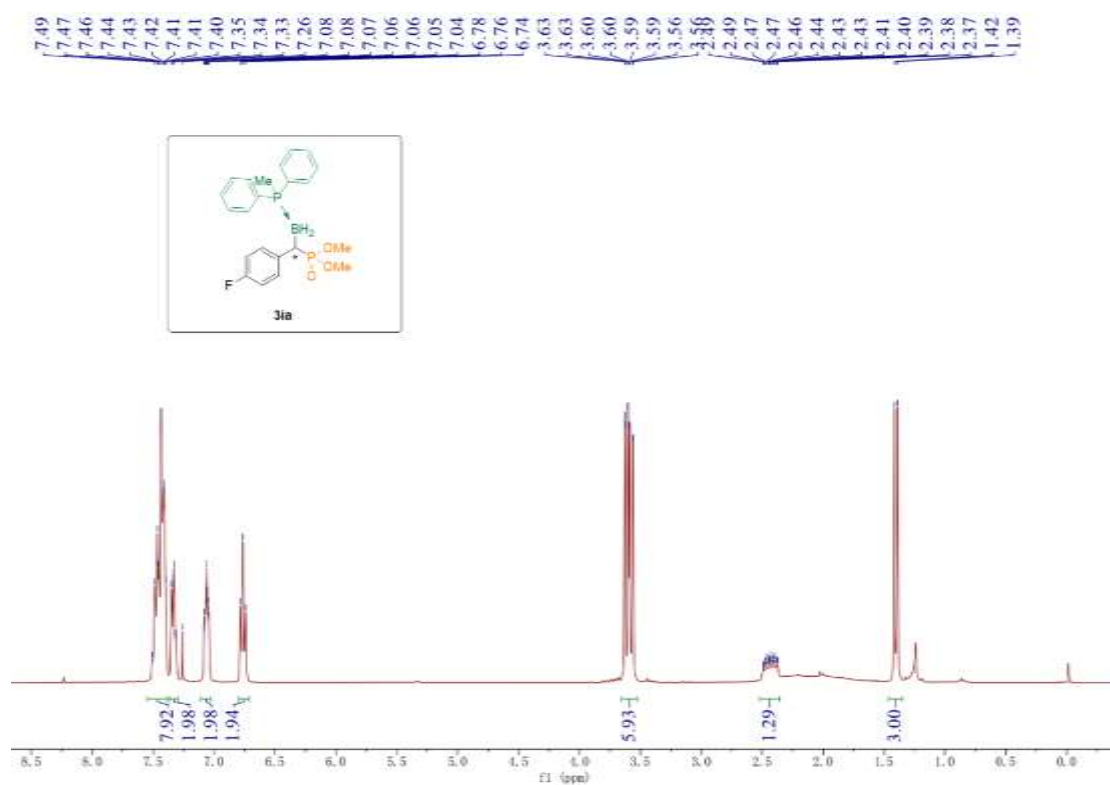

**<sup>13</sup>C NMR (101 MHz, Chloroform-*d*)**

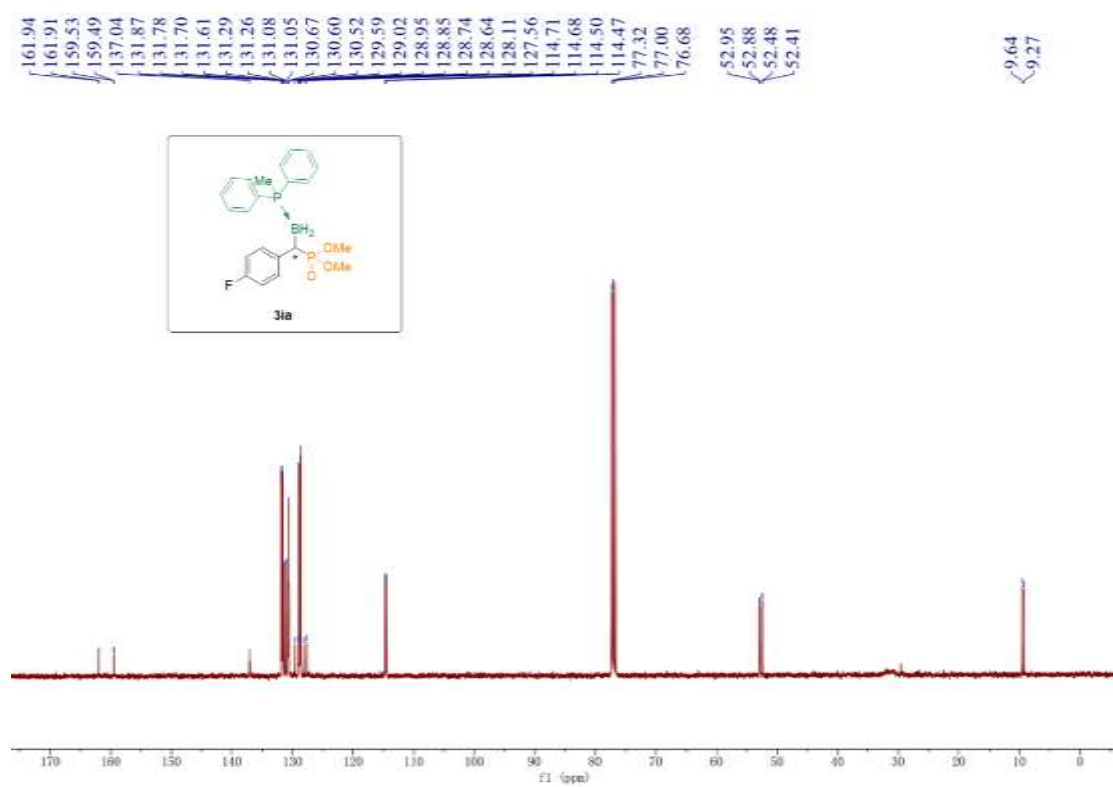

**<sup>11</sup>B NMR (128 MHz, Chloroform-*d*)**

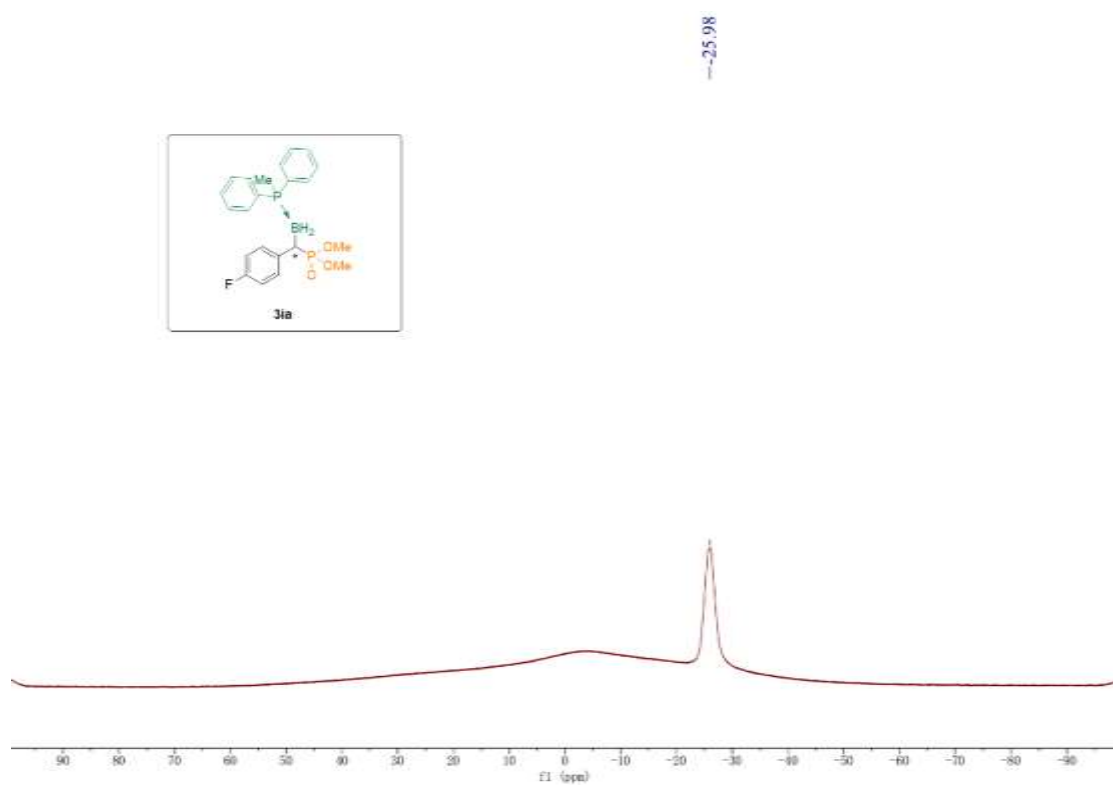

**$^{31}\text{P}$  NMR (162 MHz, Chloroform-*d*)**

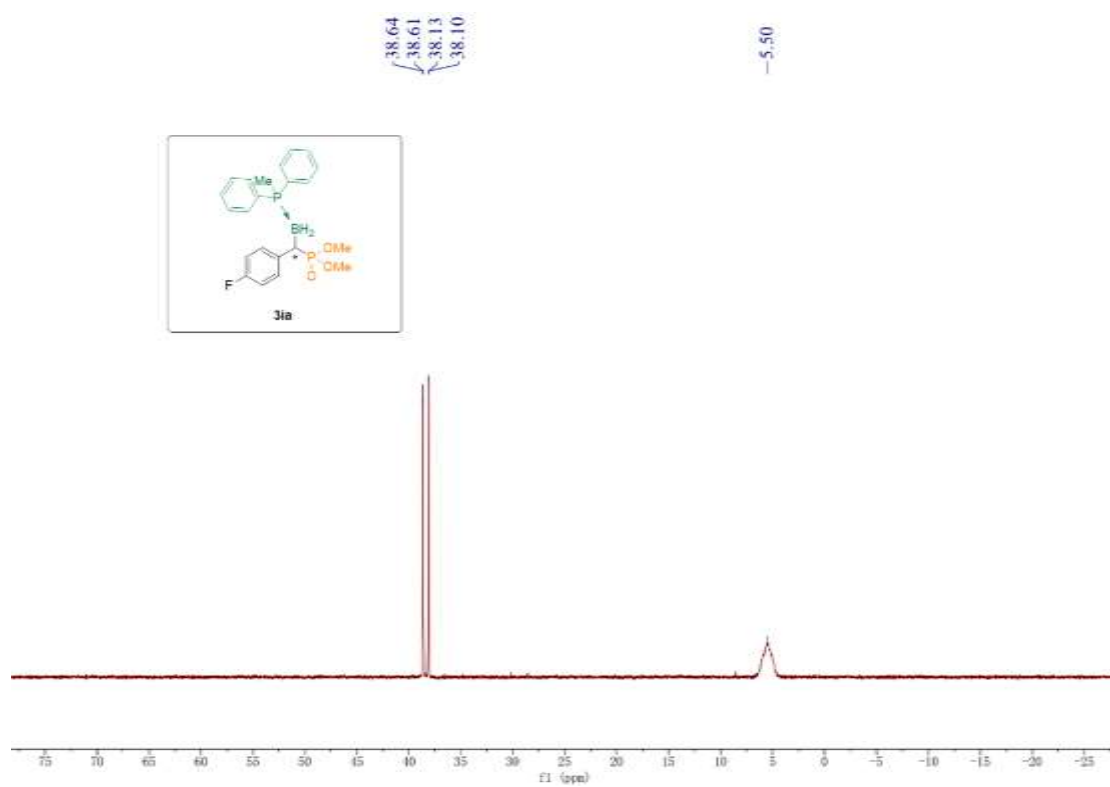

**$^{19}\text{F}$  NMR (376 MHz, Chloroform-*d*)**

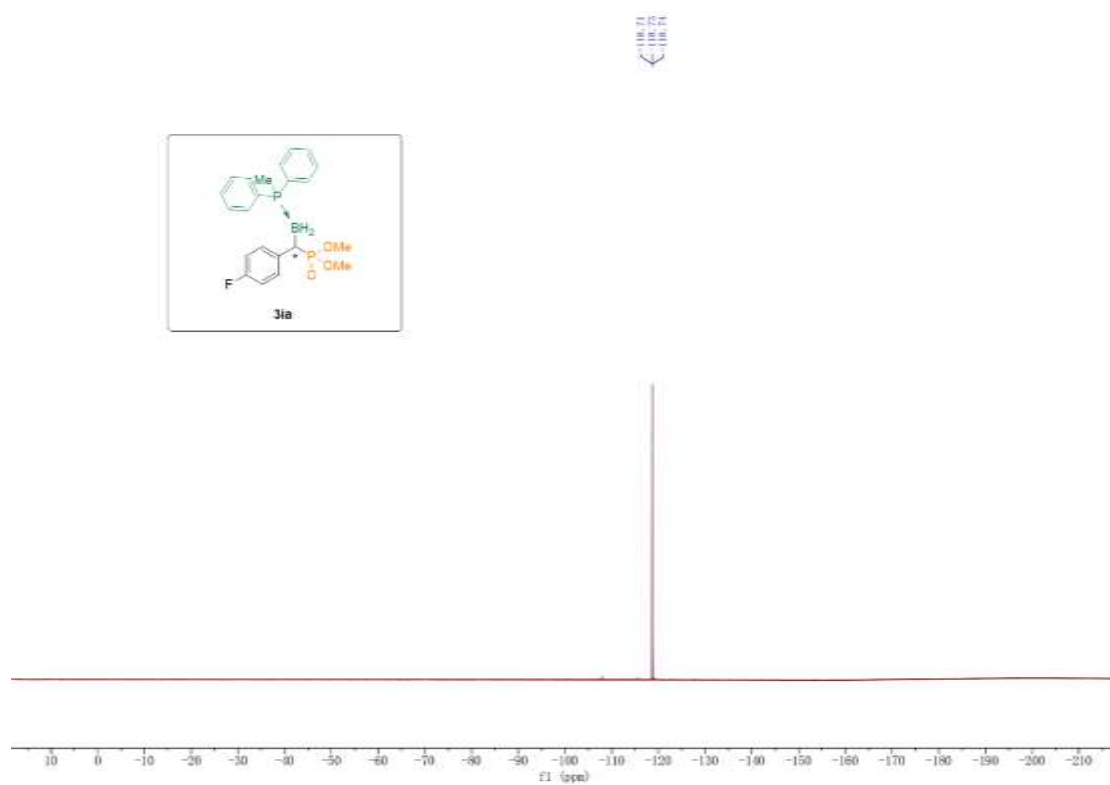

**(S)-dimethyl(((methylphenylphosphane)boryl)(4-bromophenyl)methyl)phosphonate(3ja)**

**<sup>1</sup>H NMR (500 MHz, Chloroform-*d*)**

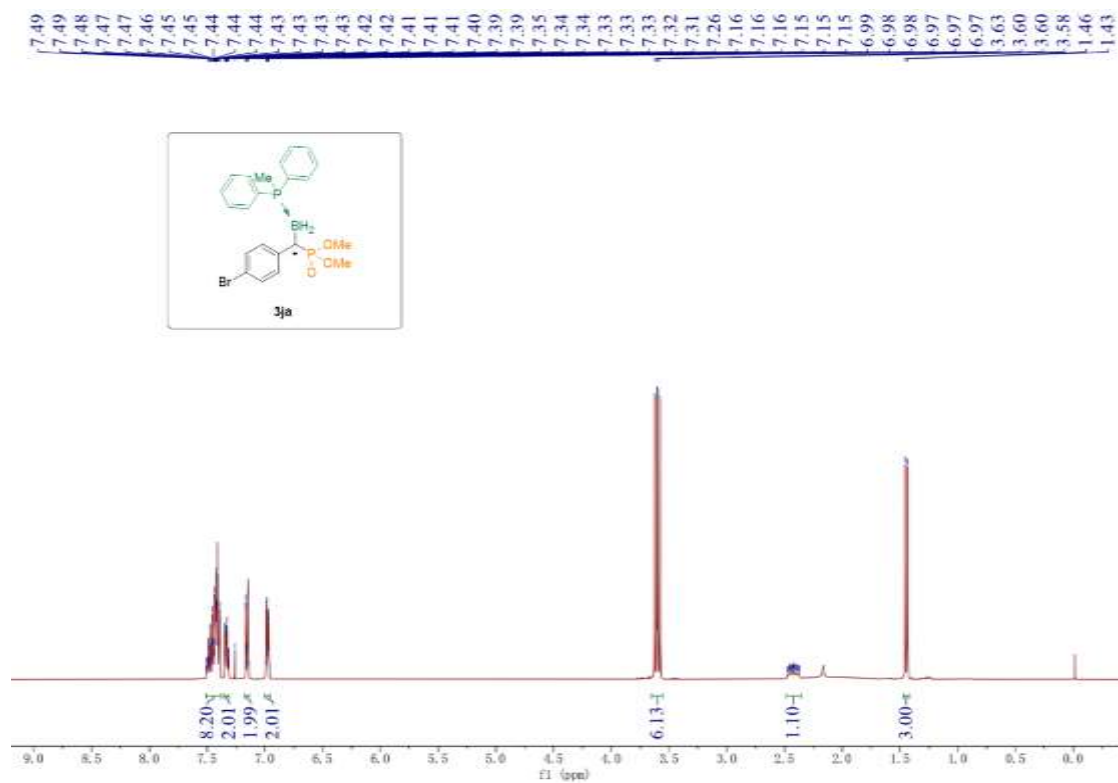

**<sup>13</sup>C NMR (126 MHz, Chloroform-*d*)**

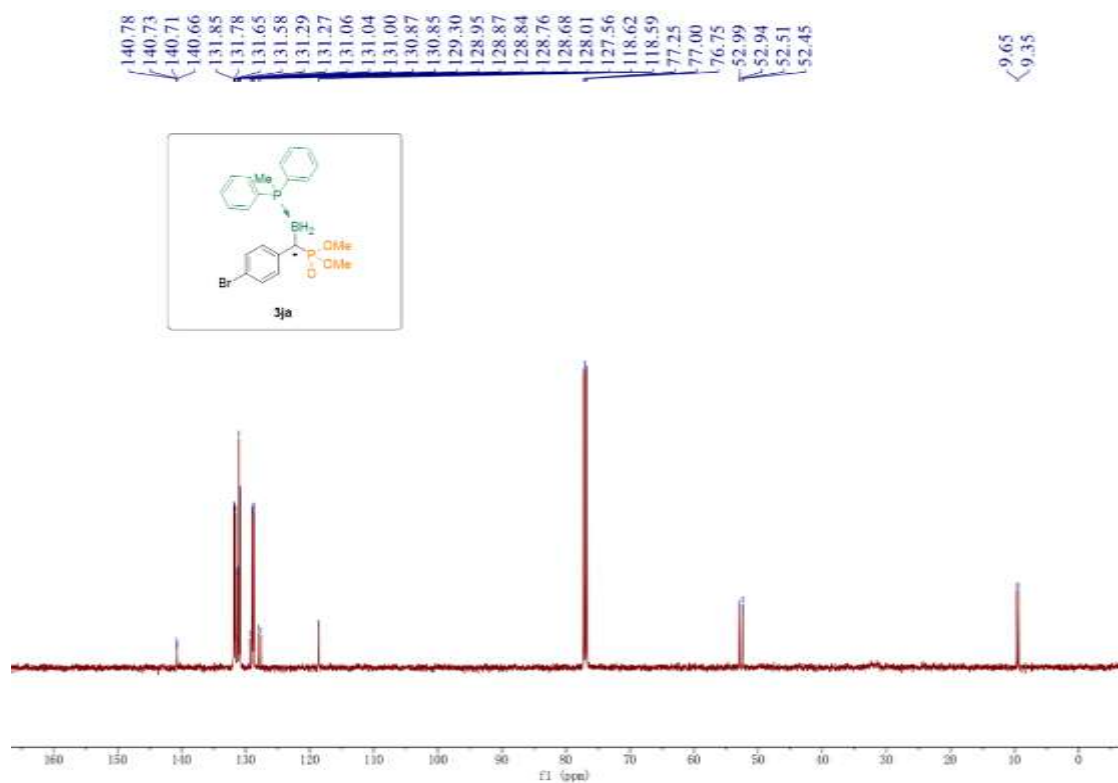

**$^{11}\text{B}$  NMR (160 MHz, Chloroform-*d*)**

-26.68

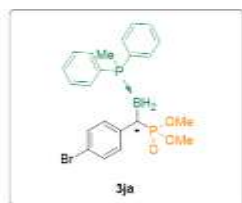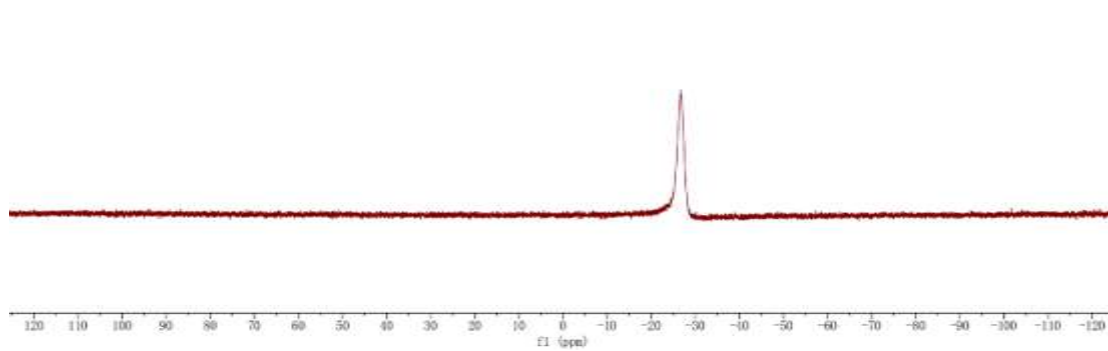

**$^{31}\text{P}$  NMR (202 MHz, Chloroform-*d*)**

38.52  
38.13

-5.98

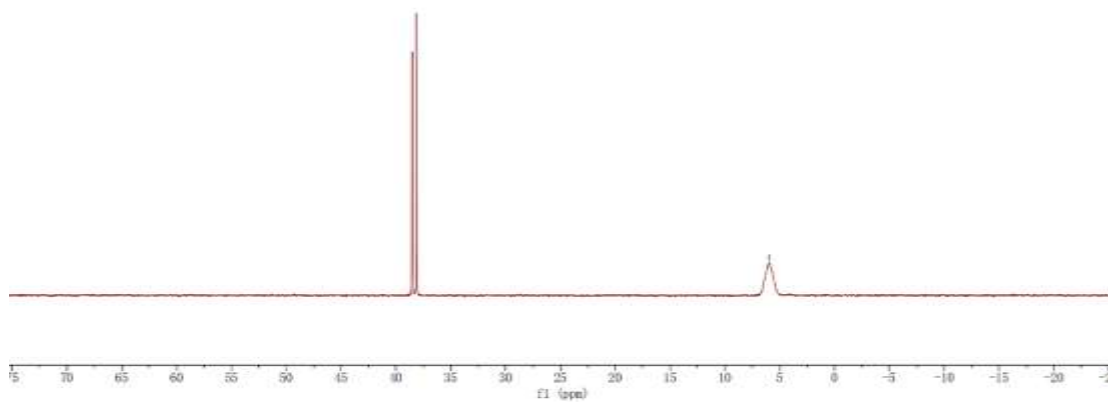

**(S)-dimethyl(((methylphenylphosphane)boryl)( 4-(trifluoromethyl)phenyl)methyl)  
phosphonate(3ka)**

**<sup>1</sup>H NMR (400 MHz, Chloroform-*d*)**

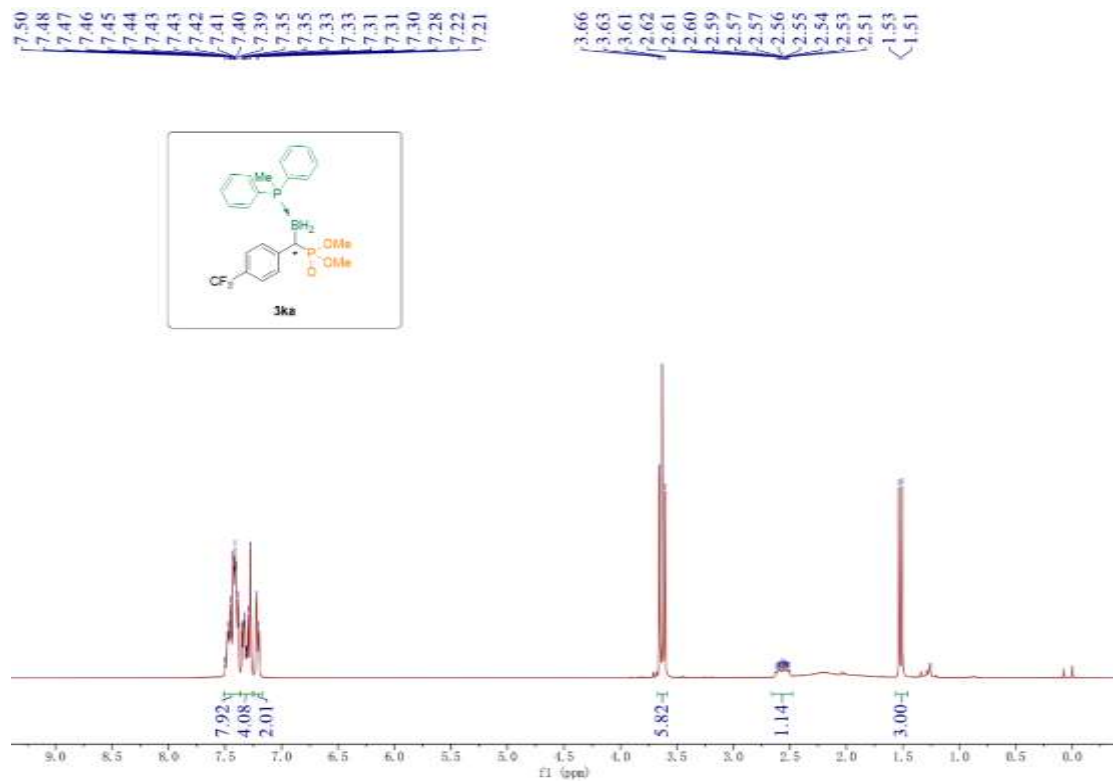

**<sup>13</sup>C NMR (101 MHz, Chloroform-*d*)**

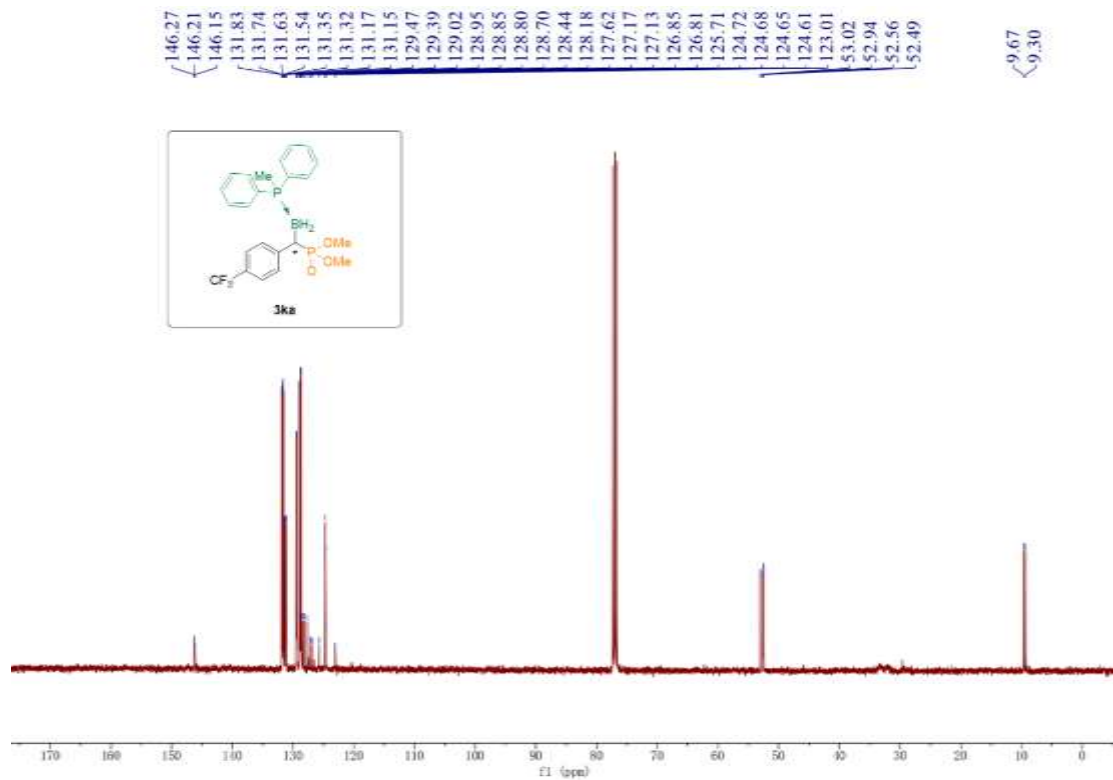

**$^{11}\text{B}$  NMR (128 MHz, Chloroform-*d*)**

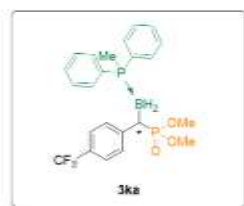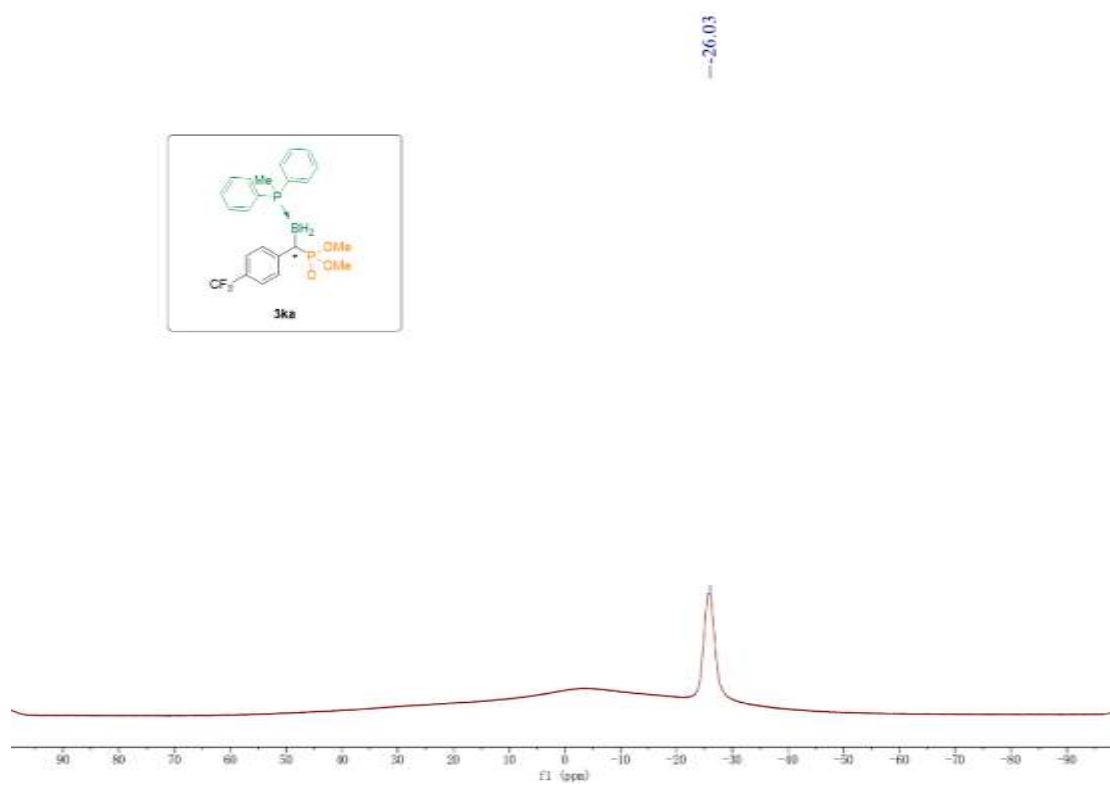

**$^{31}\text{P}$  NMR (162 MHz, Chloroform-*d*)**

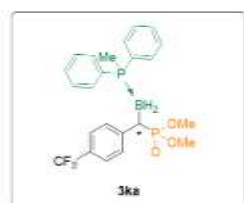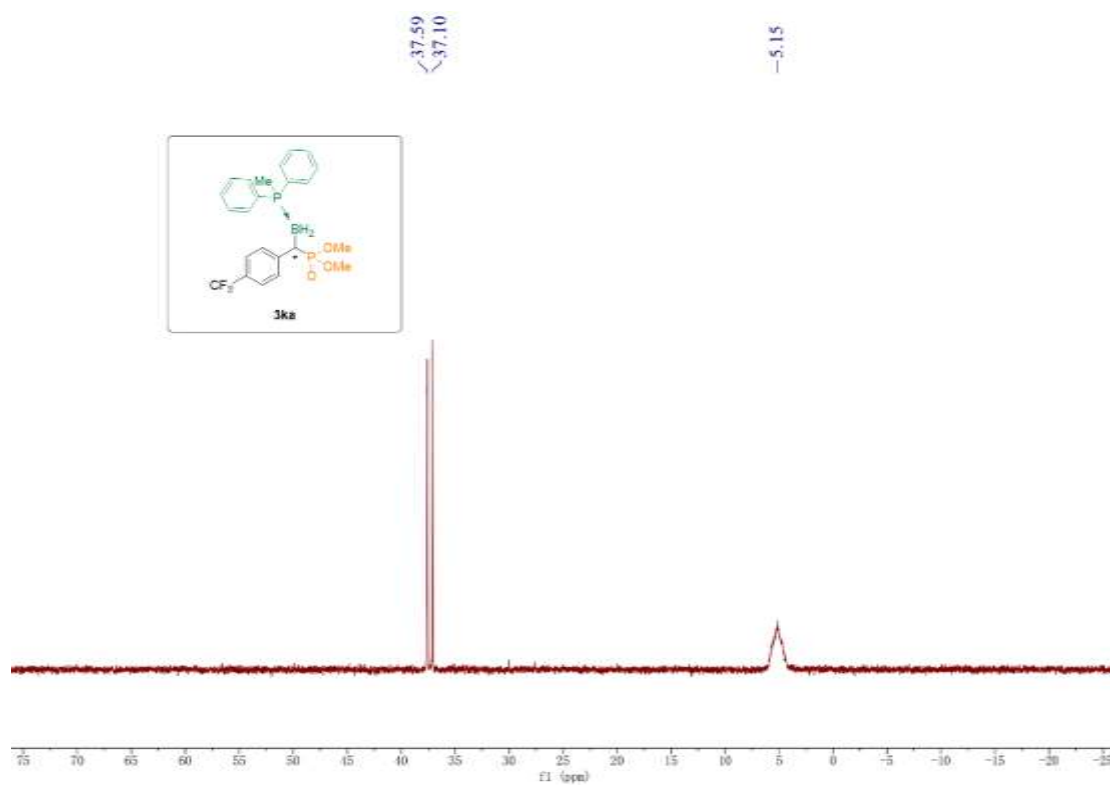

<sup>19</sup>F NMR (376 MHz, Chloroform-*d*)

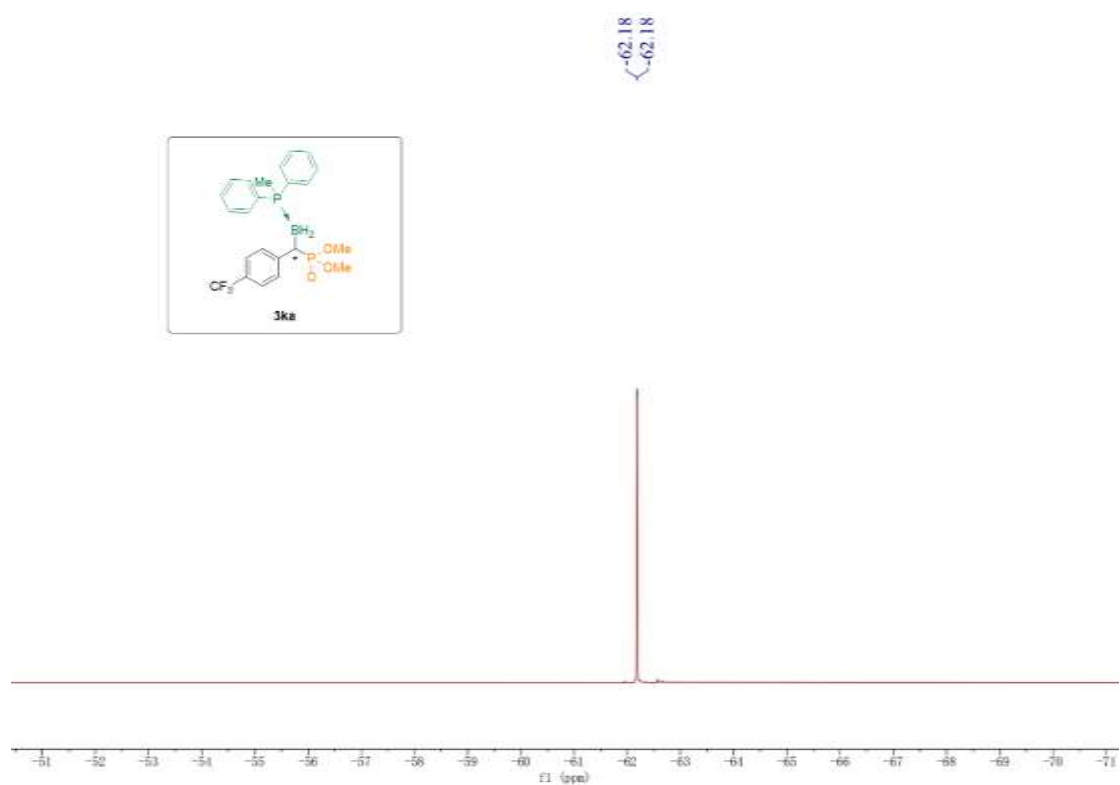

(S)-dimethyl(((methylphenylphosphane)boryl)([1,1'-biphenyl]-4-yl)methyl)phosphonate(3la)

<sup>1</sup>H NMR (400 MHz, Chloroform-*d*)

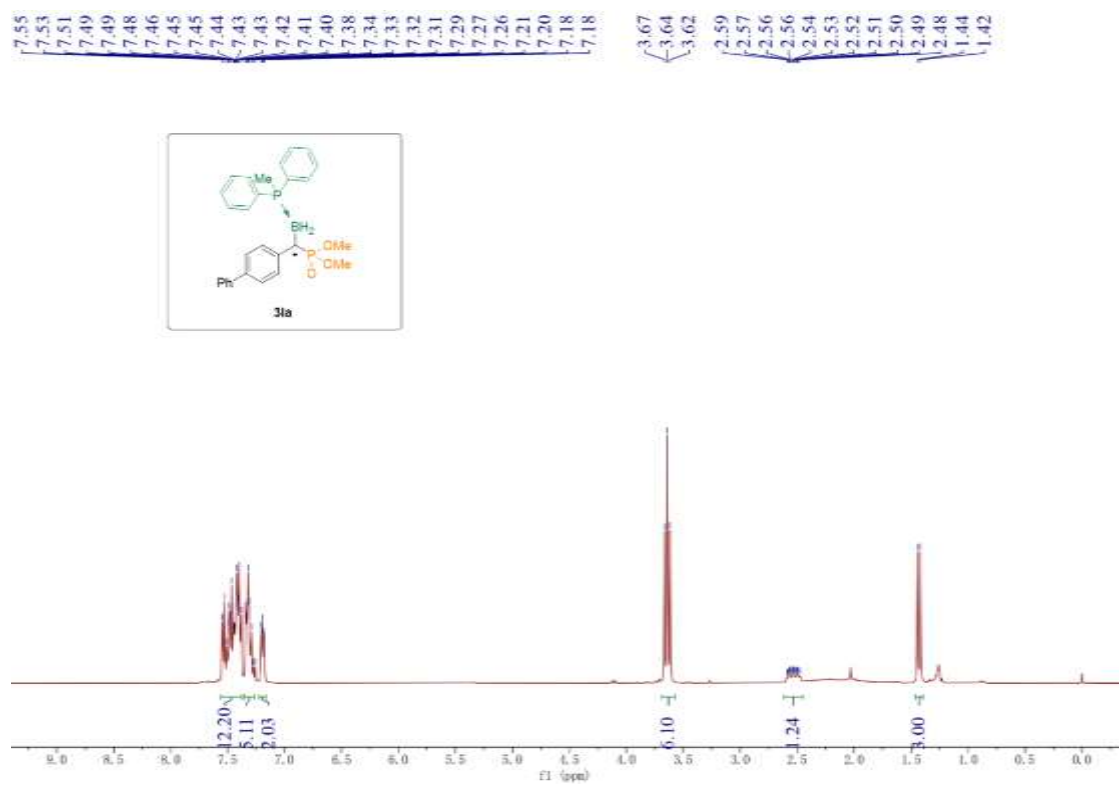



**$^{13}\text{C}$  NMR (101 MHz, Chloroform-*d*)**

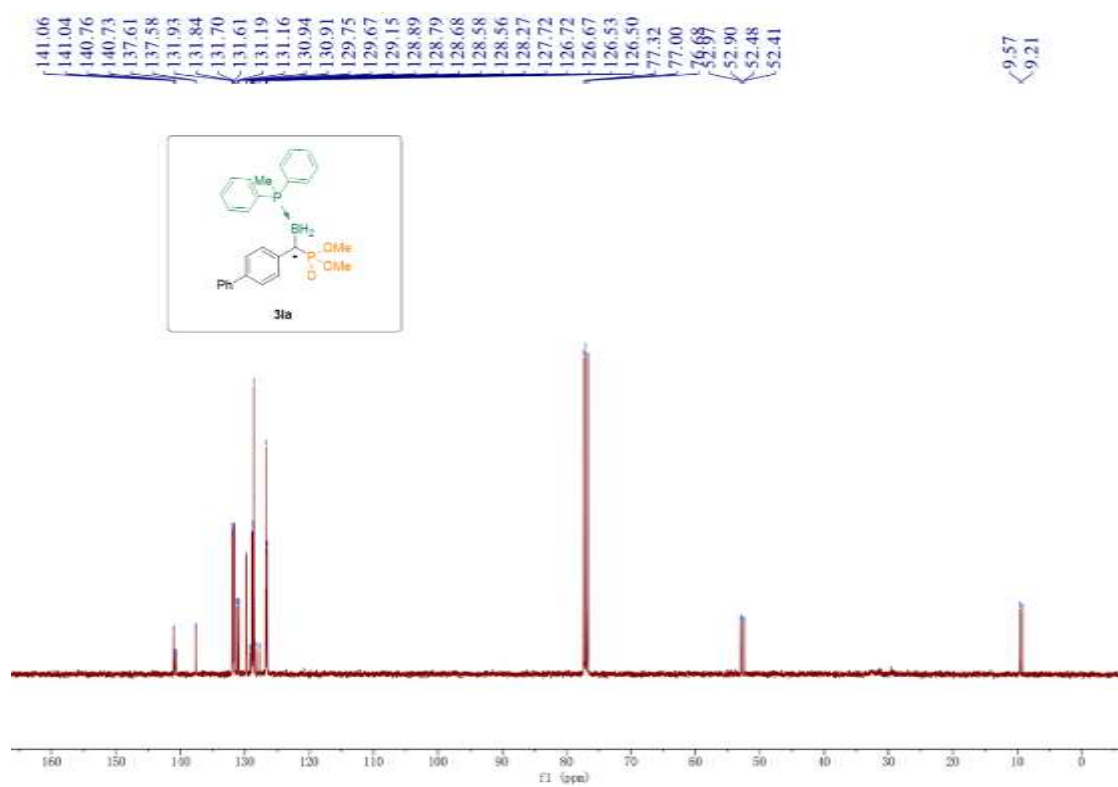

**$^{11}\text{B}$  NMR (128 MHz, Chloroform-*d*)**

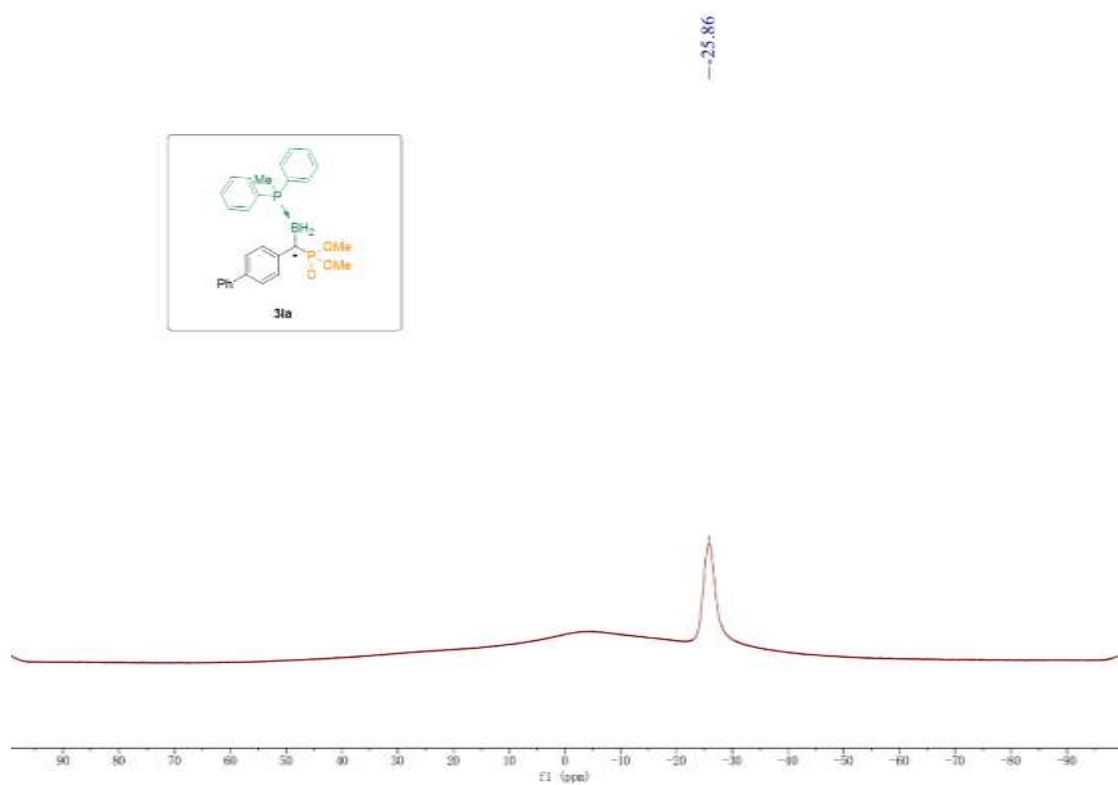

**<sup>31</sup>P NMR (162 MHz, Chloroform-*d*)**

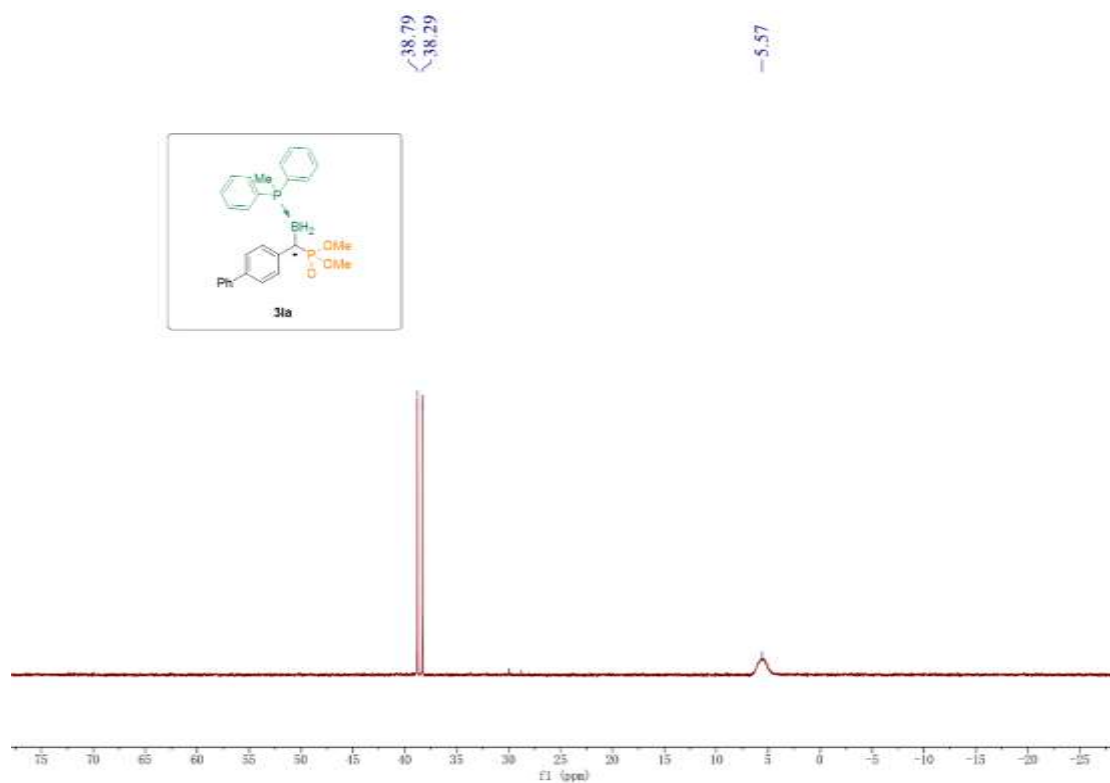

**(S)-dimethyl(((methylphenylphosphane)boryl)(4-(benzyloxy)phenyl)methyl)phosphonate(3ma)**

**<sup>1</sup>H NMR (400 MHz, Chloroform-*d*)**

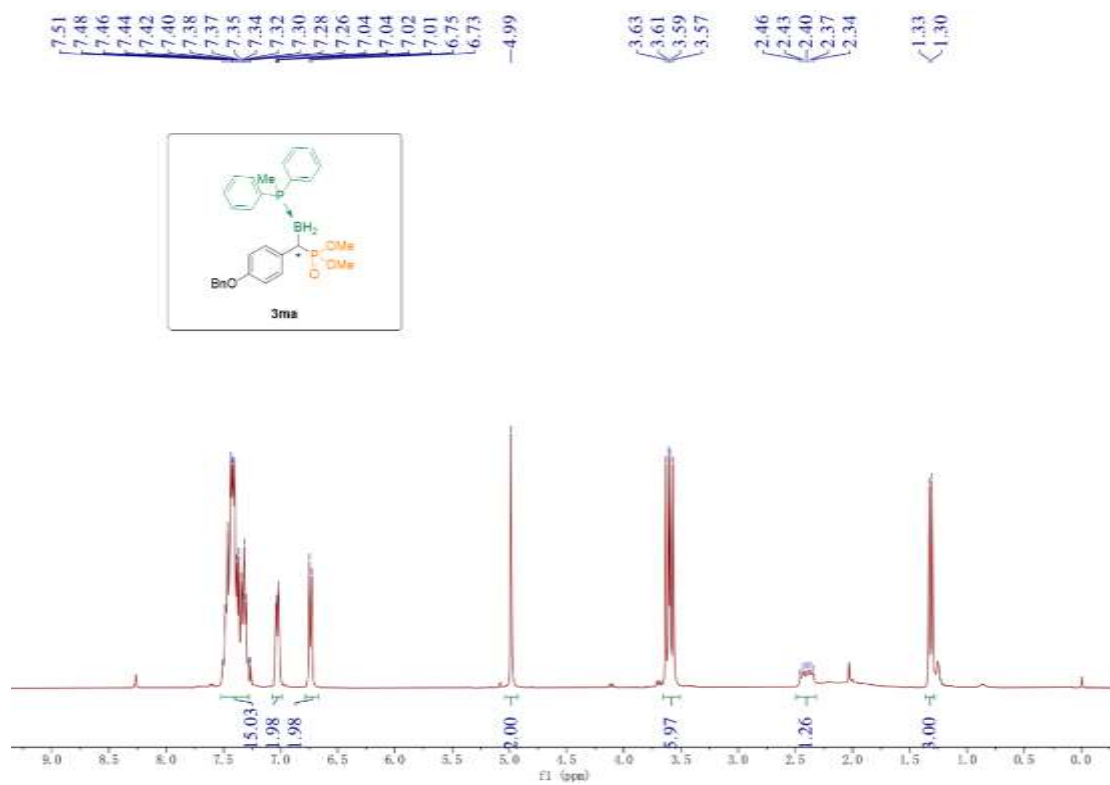

**<sup>13</sup>C NMR (101 MHz, Chloroform-*d*)**

156.40  
156.36  
137.18  
133.41  
133.36  
133.33  
133.27  
131.86  
131.77  
131.67  
131.58  
131.17  
131.14  
130.95  
130.92  
130.26  
130.18  
129.93  
129.34  
128.87  
128.77  
128.64  
128.54  
128.37  
128.05  
127.72  
127.50  
127.40  
114.48  
114.46  
77.32  
77.00  
76.68  
69.85  
52.92  
52.85  
52.45  
52.38  
9.51  
9.15

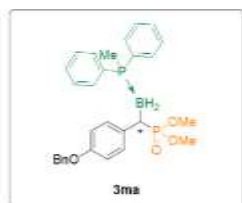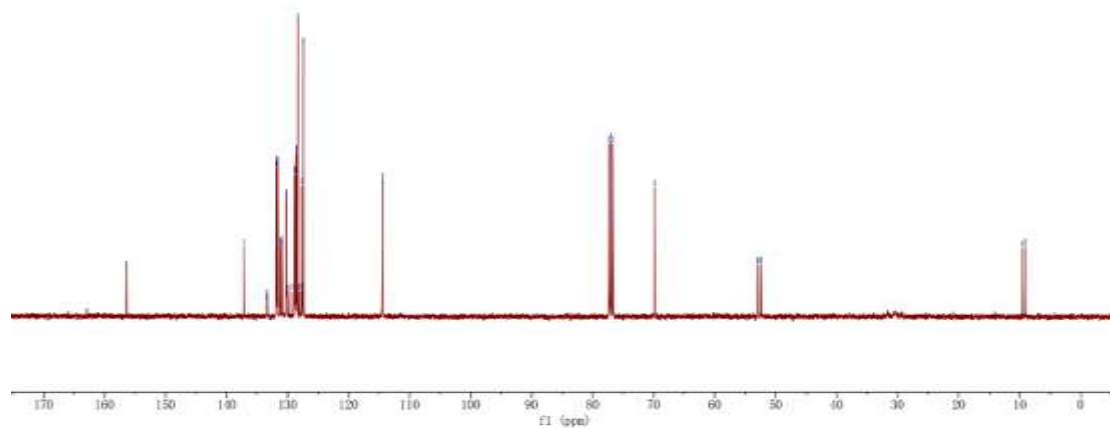

**<sup>11</sup>B NMR (128 MHz, Chloroform-*d*)**

-25.98

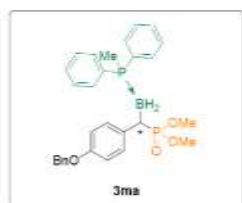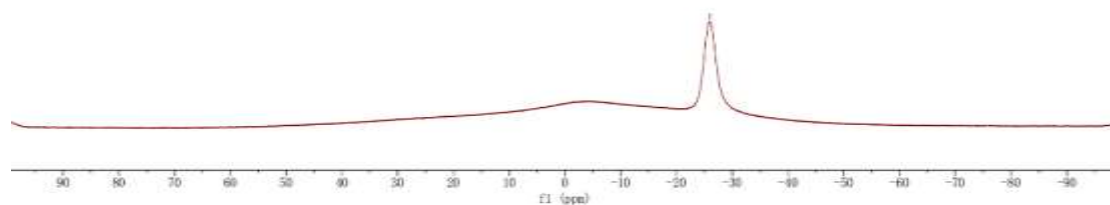

**<sup>31</sup>P NMR (162 MHz, Chloroform-*d*)**

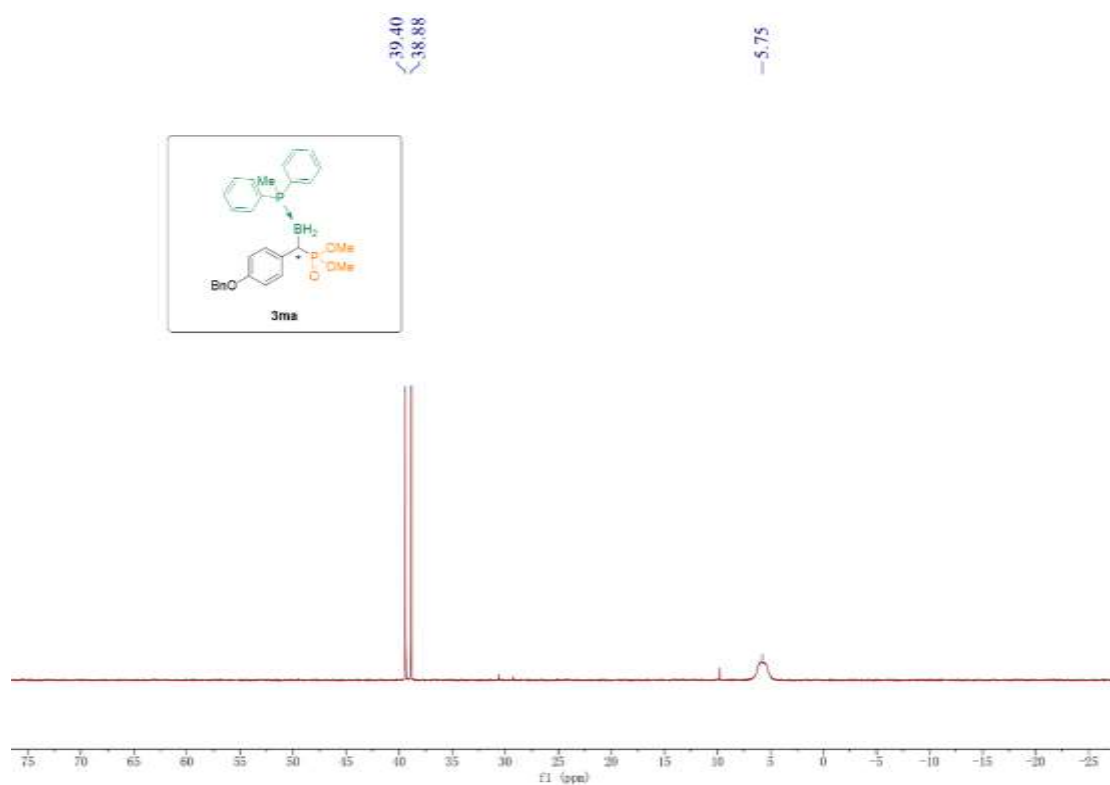

**(S)-dimethyl(((methylphenylphosphane)boryl)(4-cyanophenyl)methyl)phosphonate(3na)**

**<sup>1</sup>H NMR (500 MHz, Chloroform-*d*)**

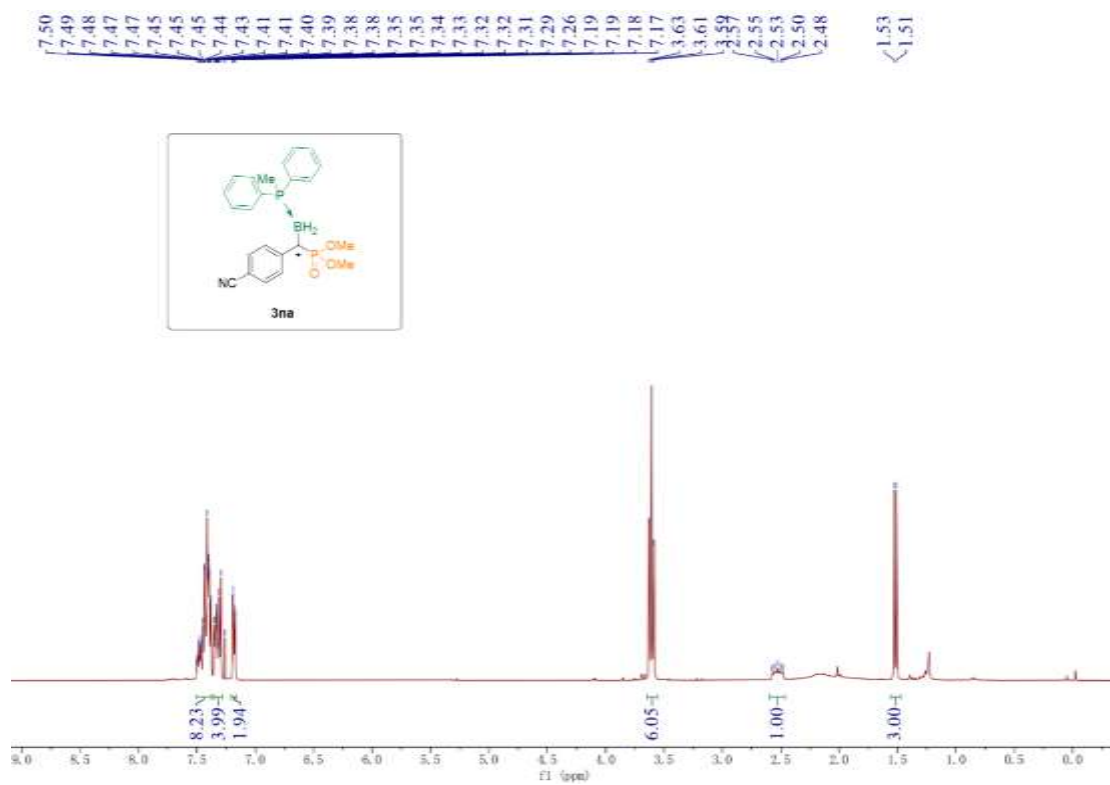

**$^{13}\text{C}$  NMR (126 MHz, Chloroform-*d*)**

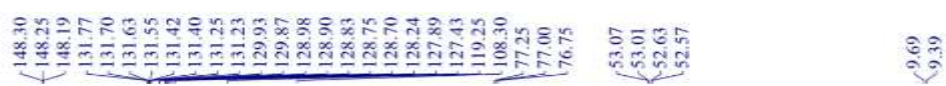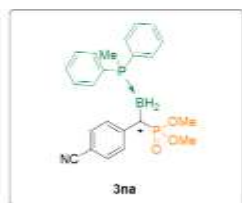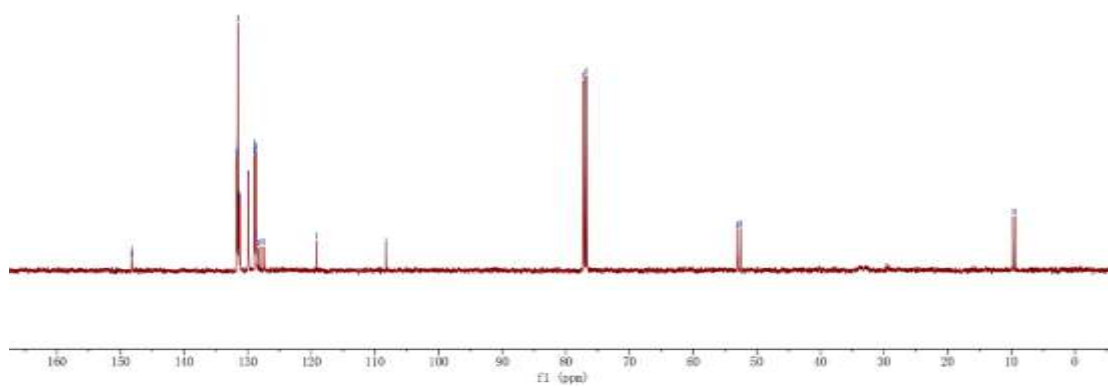

**$^{11}\text{B}$  NMR (128 MHz, Chloroform-*d*)**

-26.18

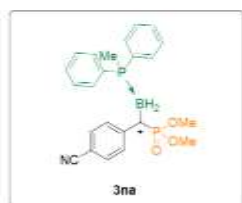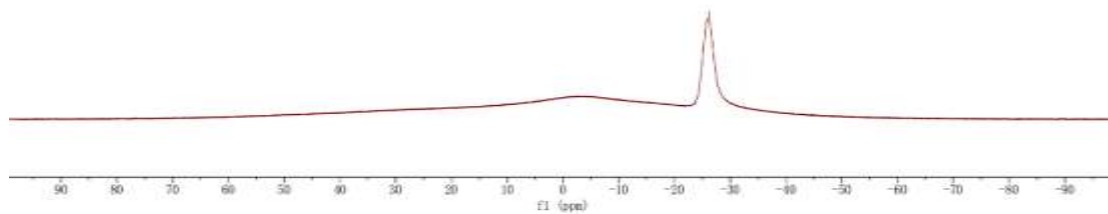

**<sup>31</sup>P NMR (202 MHz, Chloroform-*d*)**

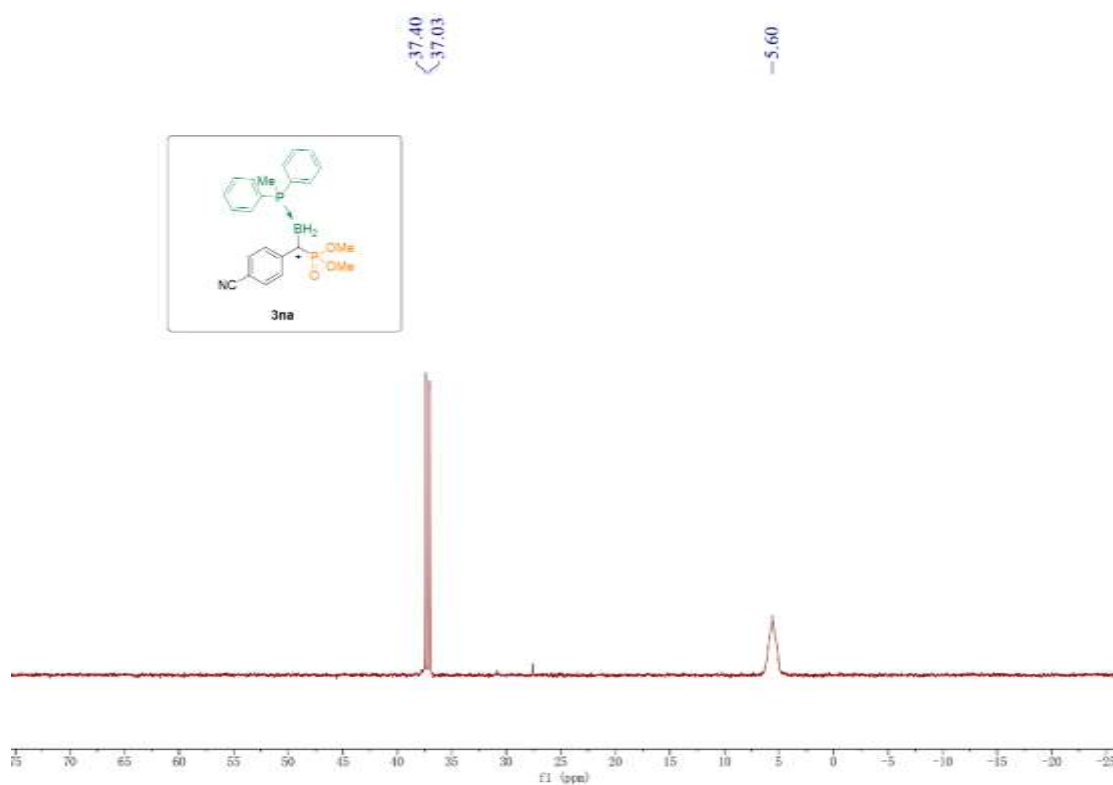

**(S)-dimethyl(((methylphenylphosphane)boryl)(3-methoxyphenyl)methyl)phosphonate(3oa)**

**<sup>1</sup>H NMR (400 MHz, Chloroform-*d*)**

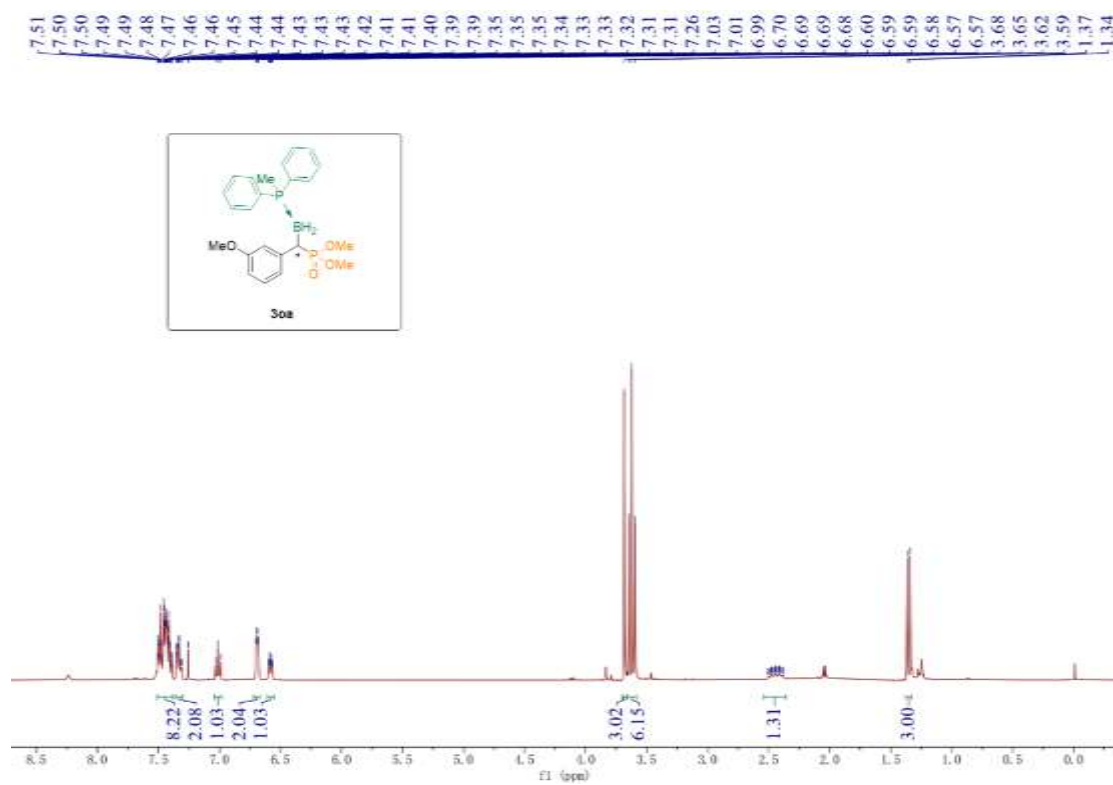

**<sup>13</sup>C NMR (101 MHz, Chloroform-*d*)**

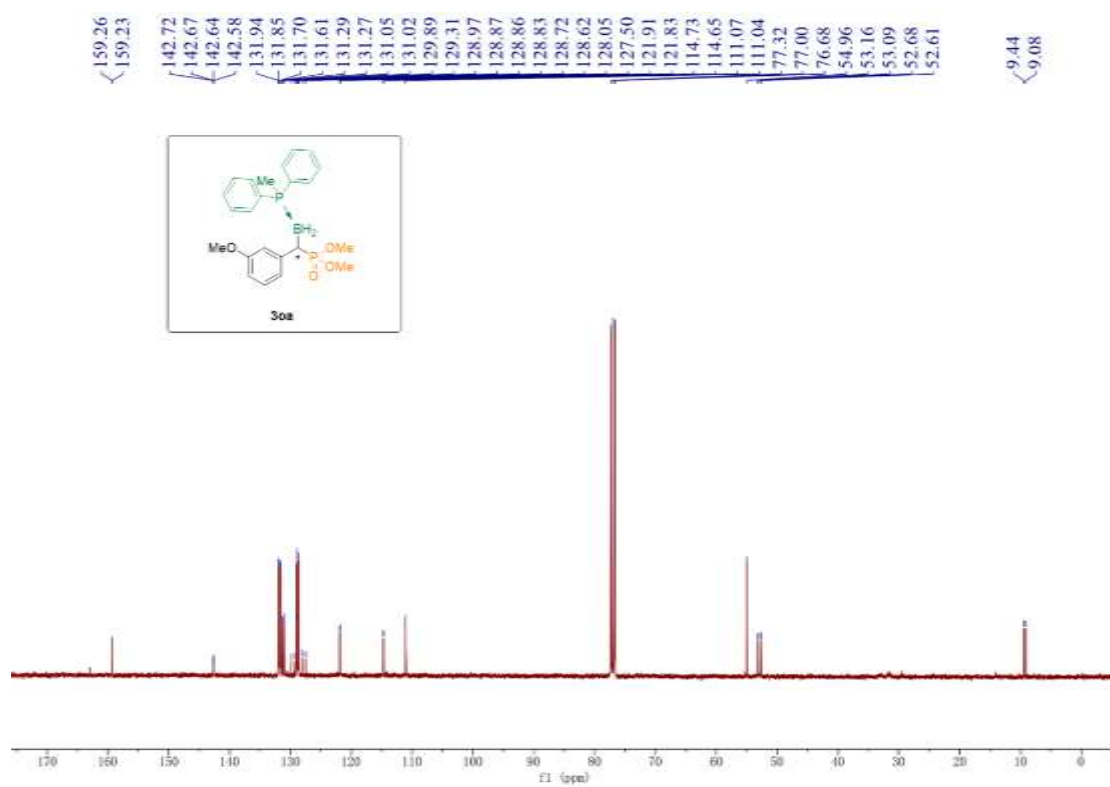

**<sup>11</sup>B NMR (128 MHz, Chloroform-*d*)**

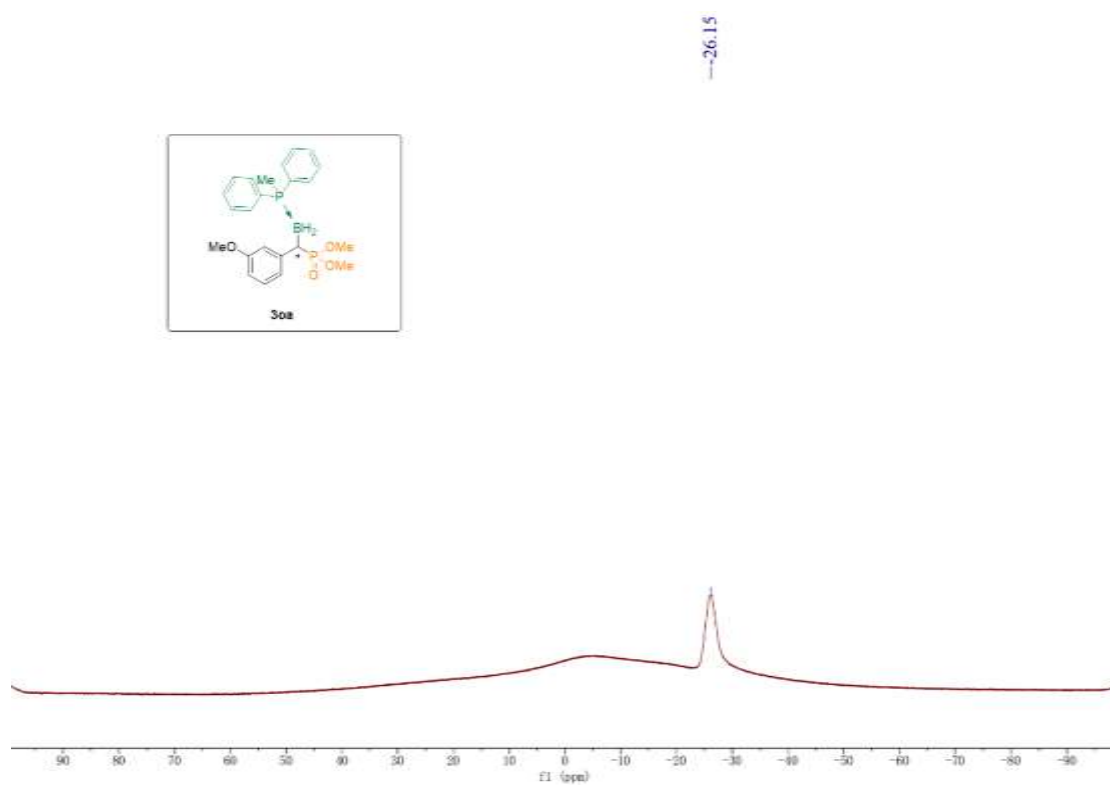

**<sup>31</sup>P NMR (162 MHz, Chloroform-*d*)**

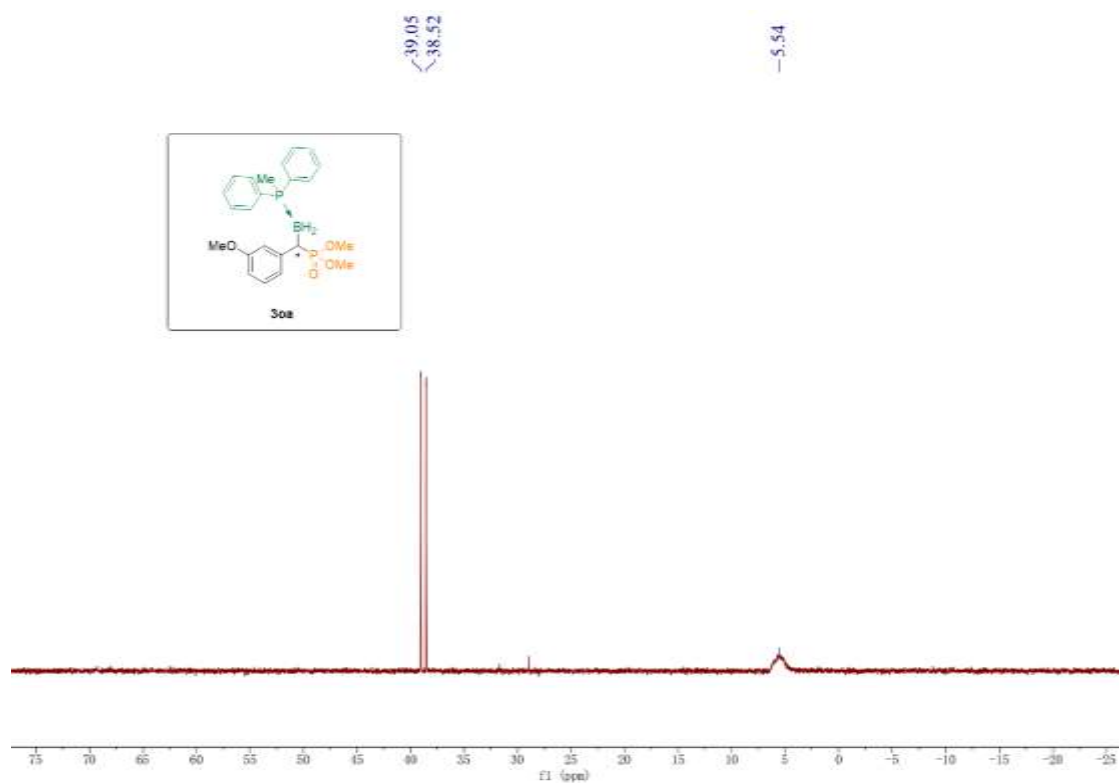

**(S)-methyl-3-(((methylphenylphosphane)boryl) (dimethoxyphosphoryl)methyl)benzoate (**3pa**)**

**<sup>1</sup>H NMR (400 MHz, Chloroform-*d*)**

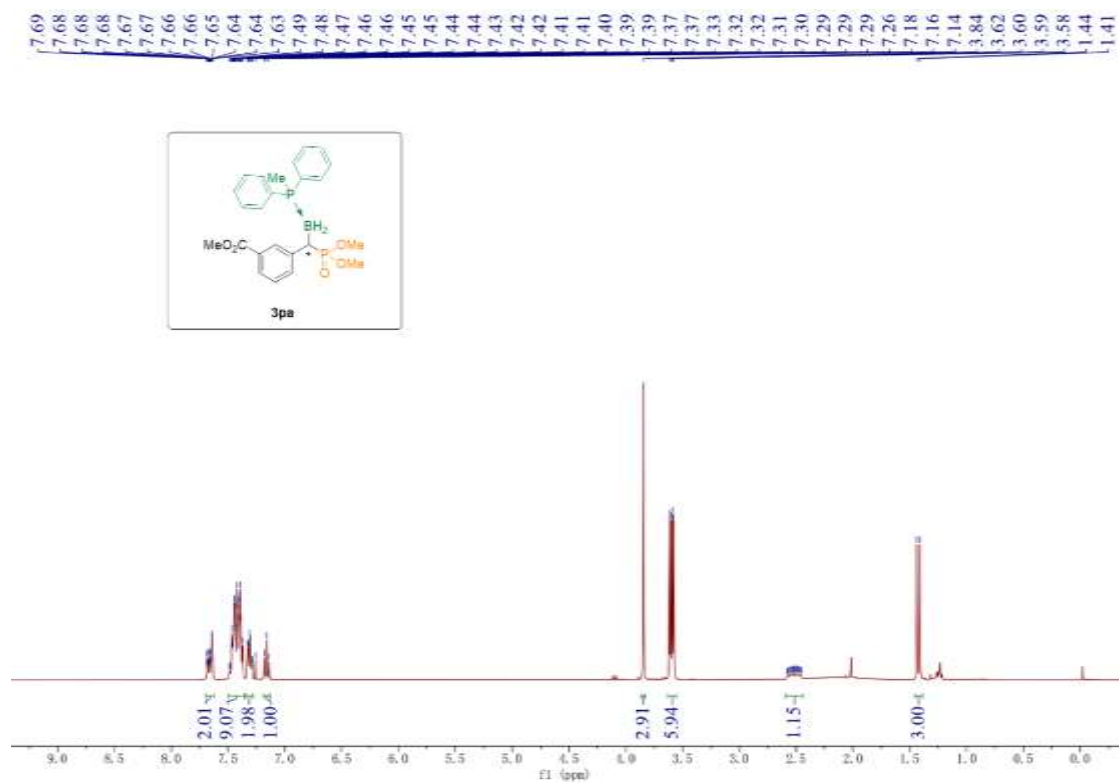



**<sup>13</sup>C NMR (101 MHz, Chloroform-*d*)**

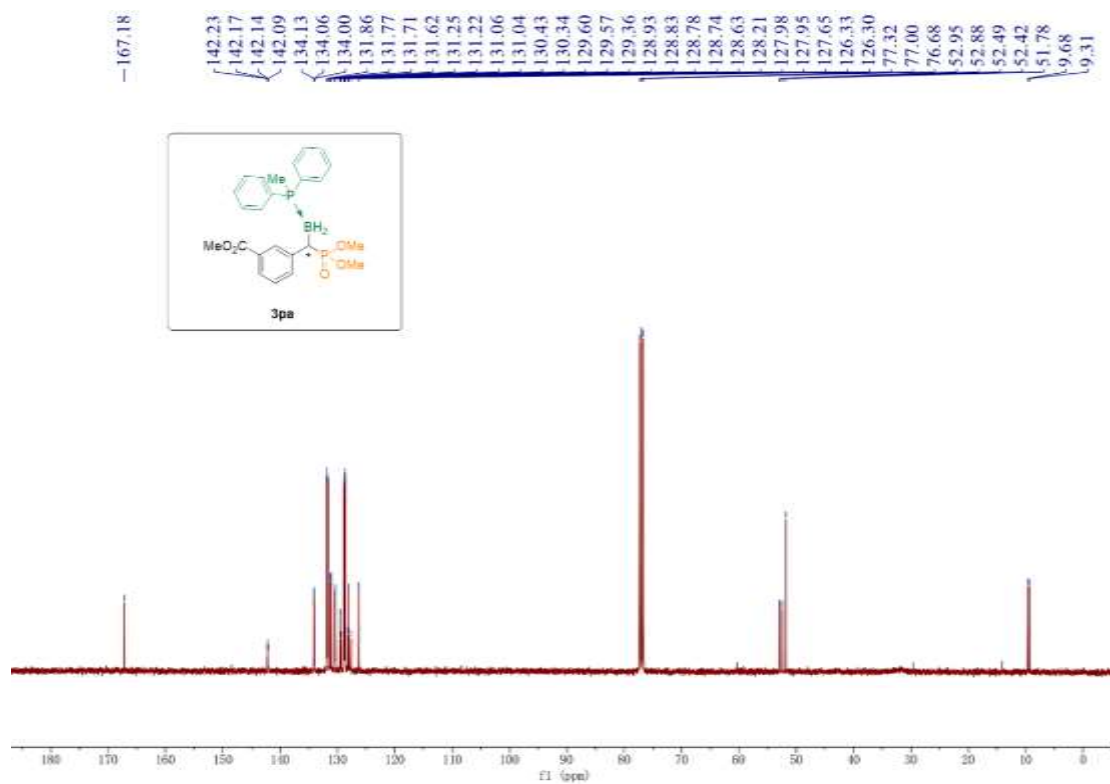

**<sup>11</sup>B NMR (128 MHz, Chloroform-*d*)**

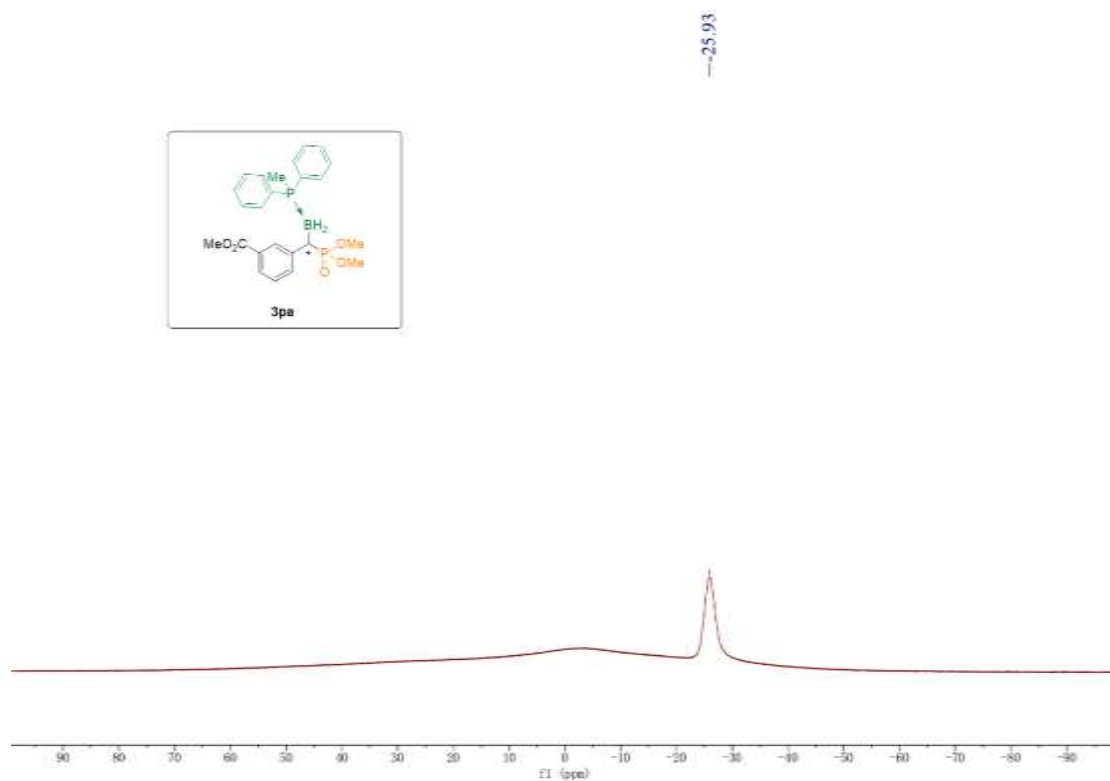

**<sup>31</sup>P NMR (162 MHz, Chloroform-*d*)**

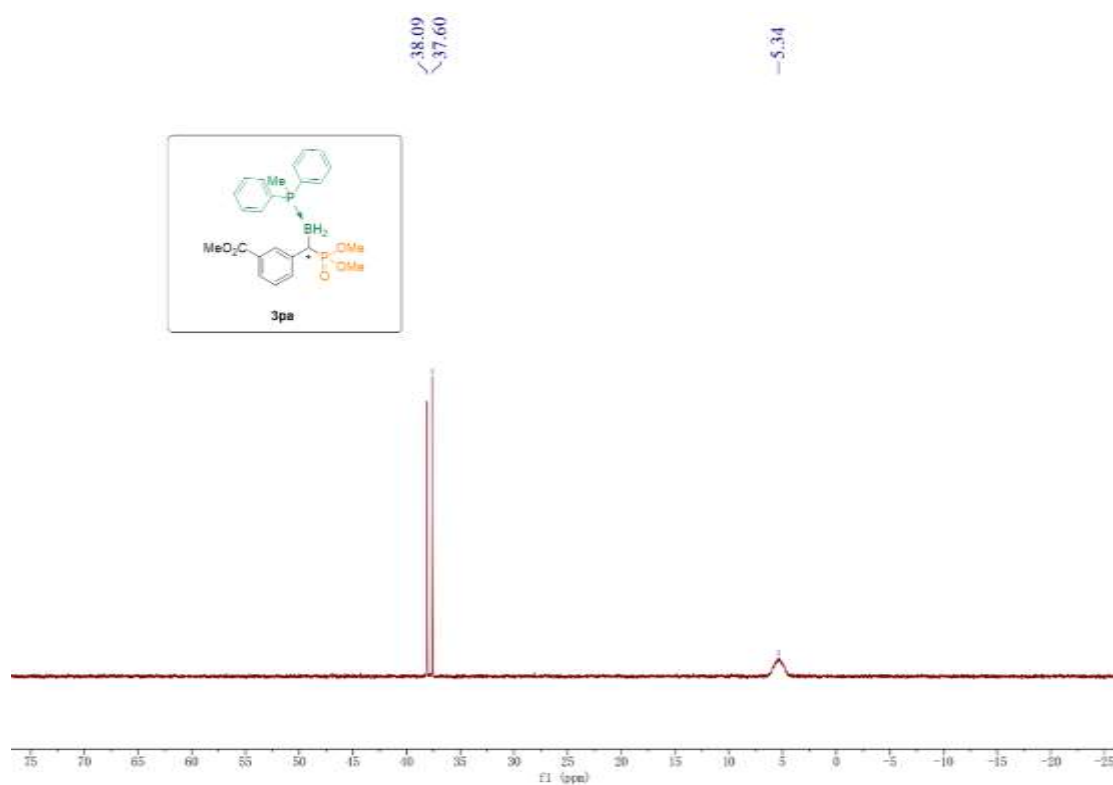

**(S)-dimethyl(((methylphenylphosphane)boryl)(3-iodophenyl)methyl)phosphonate(3qa)**

**<sup>1</sup>H NMR (400 MHz, Chloroform-*d*)**

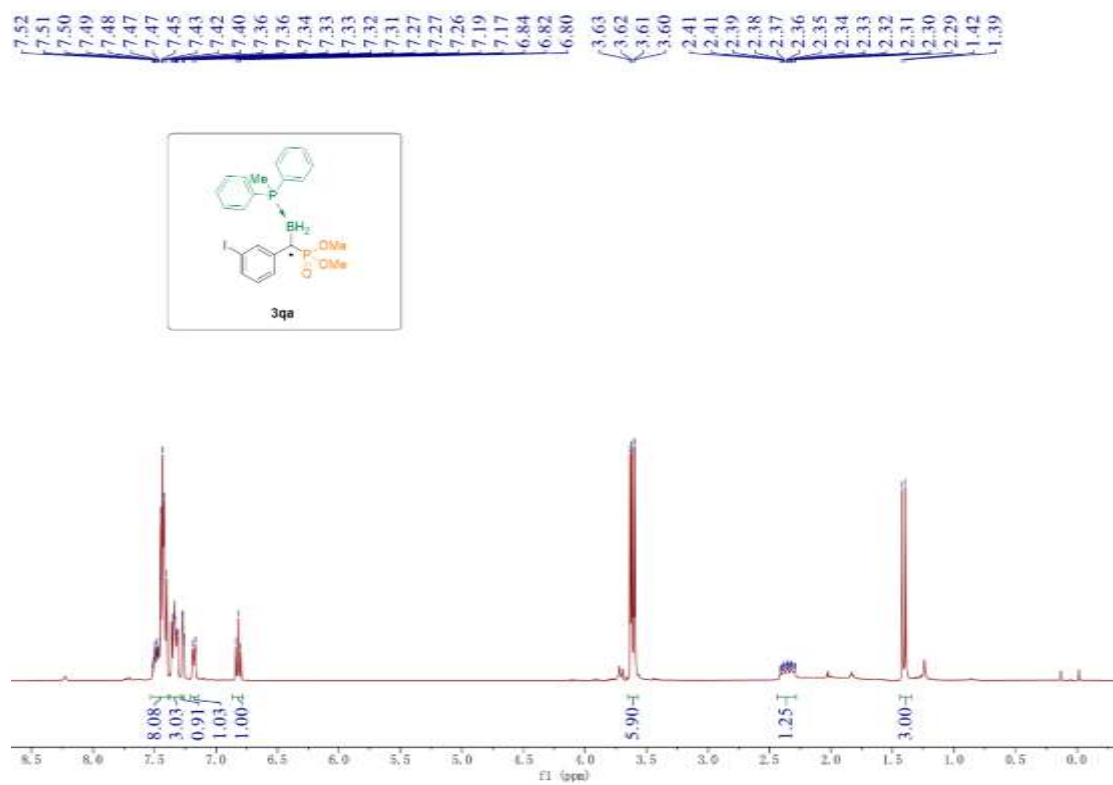

**<sup>13</sup>C NMR (101 MHz, Chloroform-*d*)**

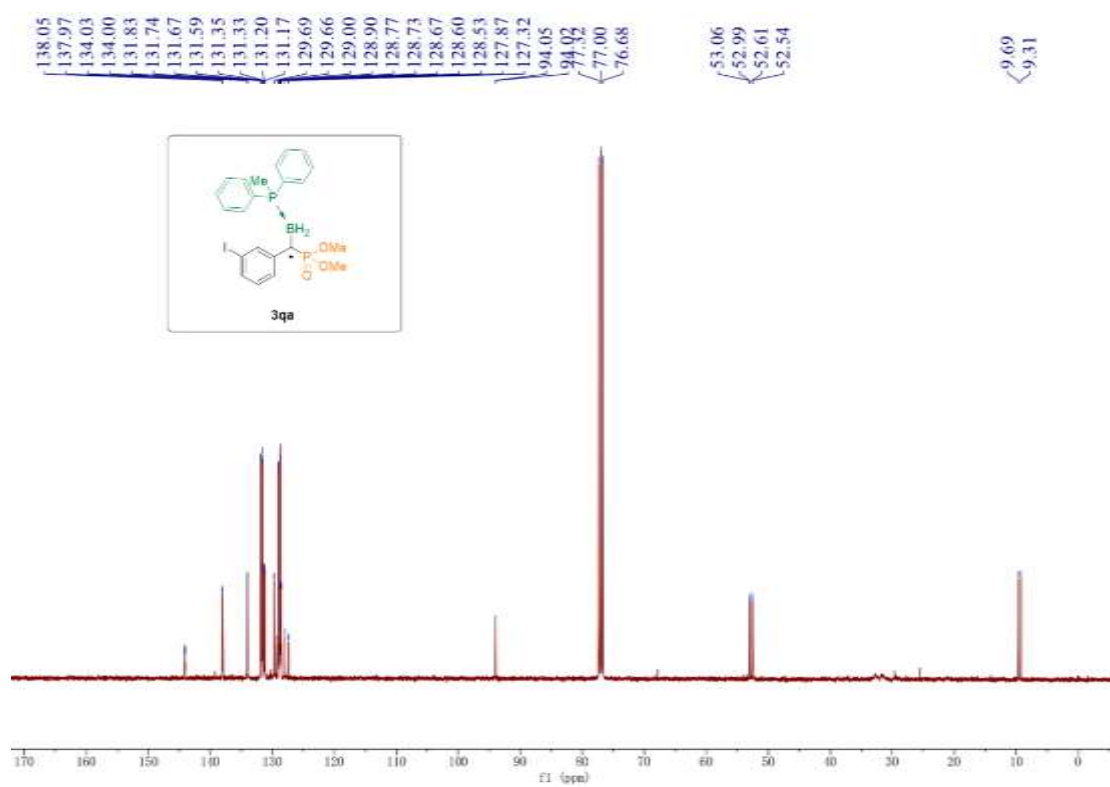

**<sup>11</sup>B NMR (128 MHz, Chloroform-*d*)**

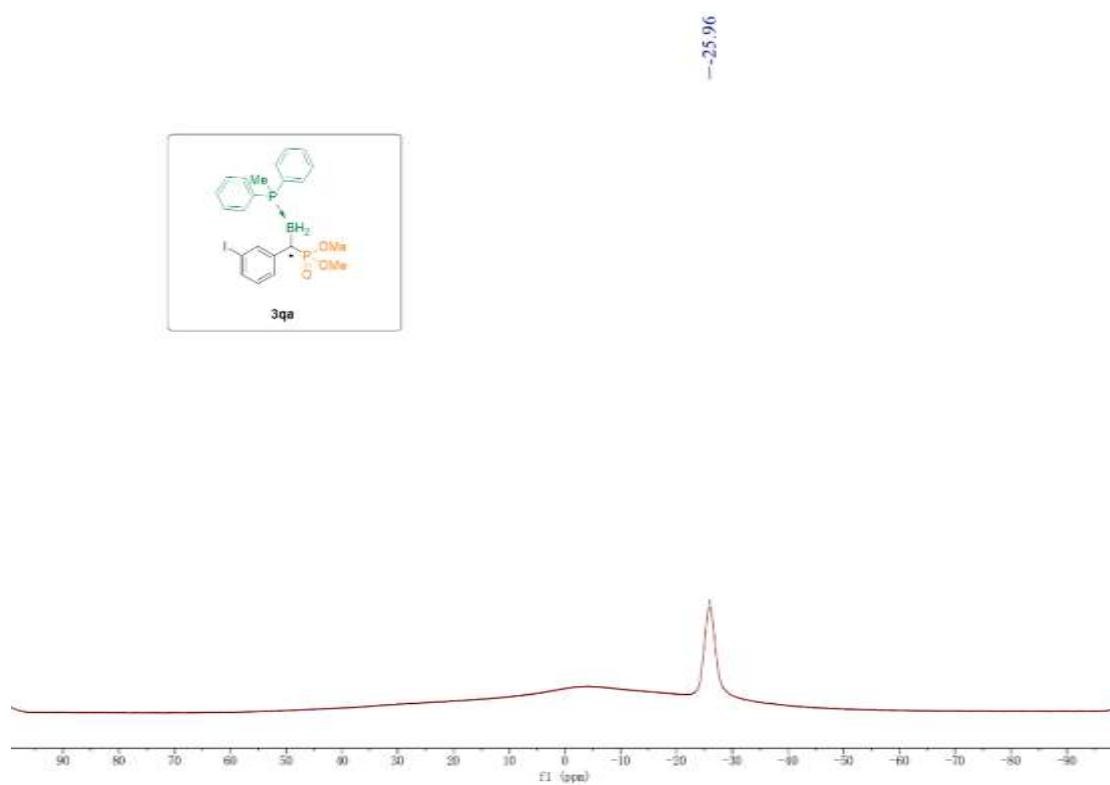

**<sup>31</sup>P NMR (162 MHz, Chloroform-*d*)**

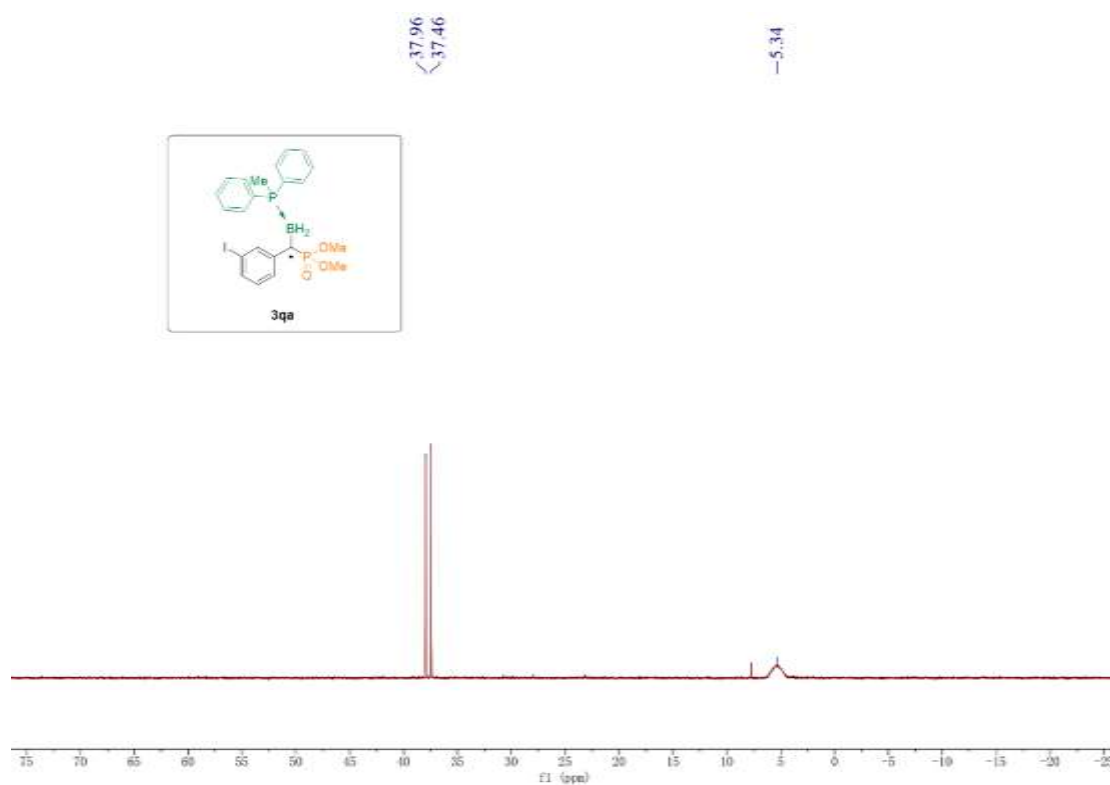

**(S)-dimethyl(((methylphenylphosphane)boryl)(2-fluorophenyl)methyl)phosphonate(3ra)**

**<sup>1</sup>H NMR (500 MHz, Chloroform-*d*)**

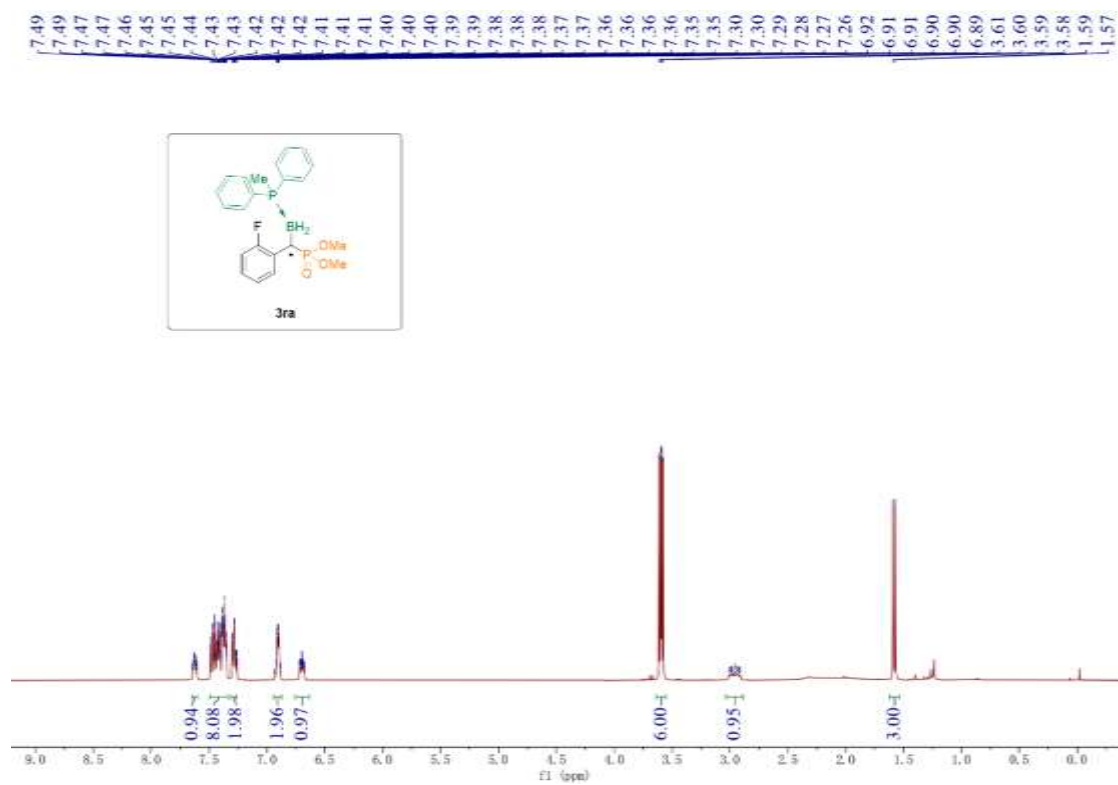

**<sup>13</sup>C NMR (101 MHz, Chloroform-*d*)**

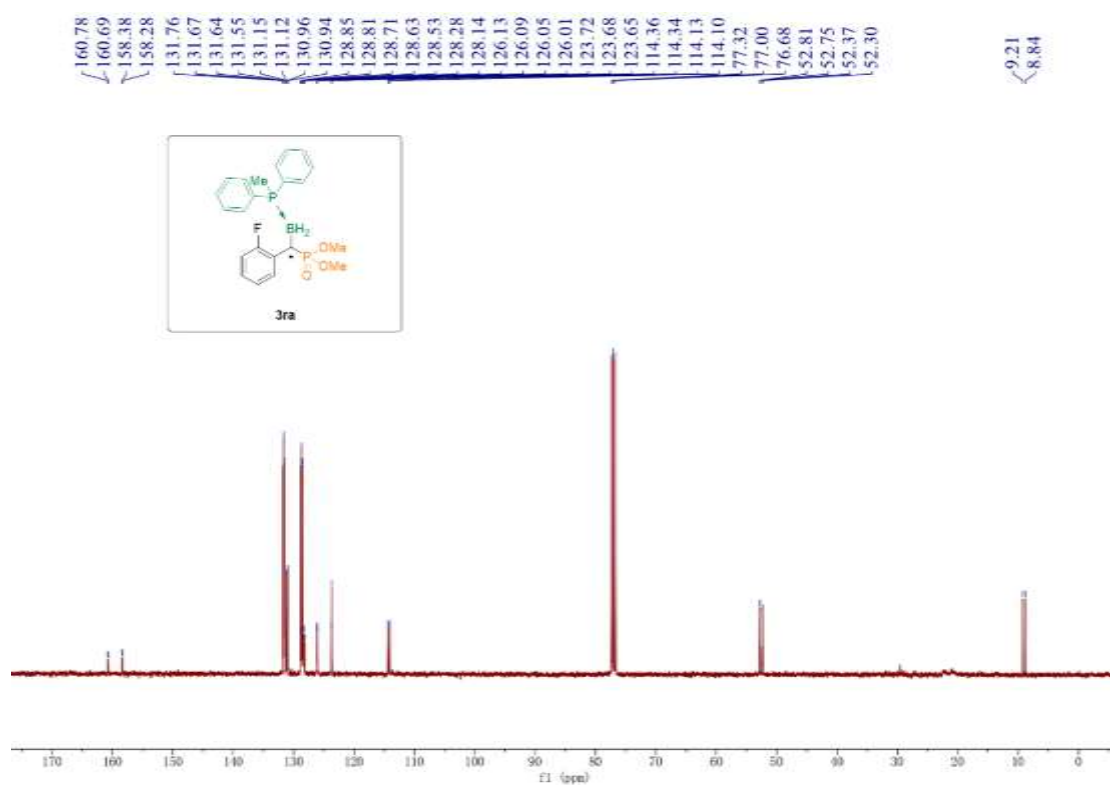

**<sup>11</sup>B NMR (160 MHz, Chloroform-*d*)**

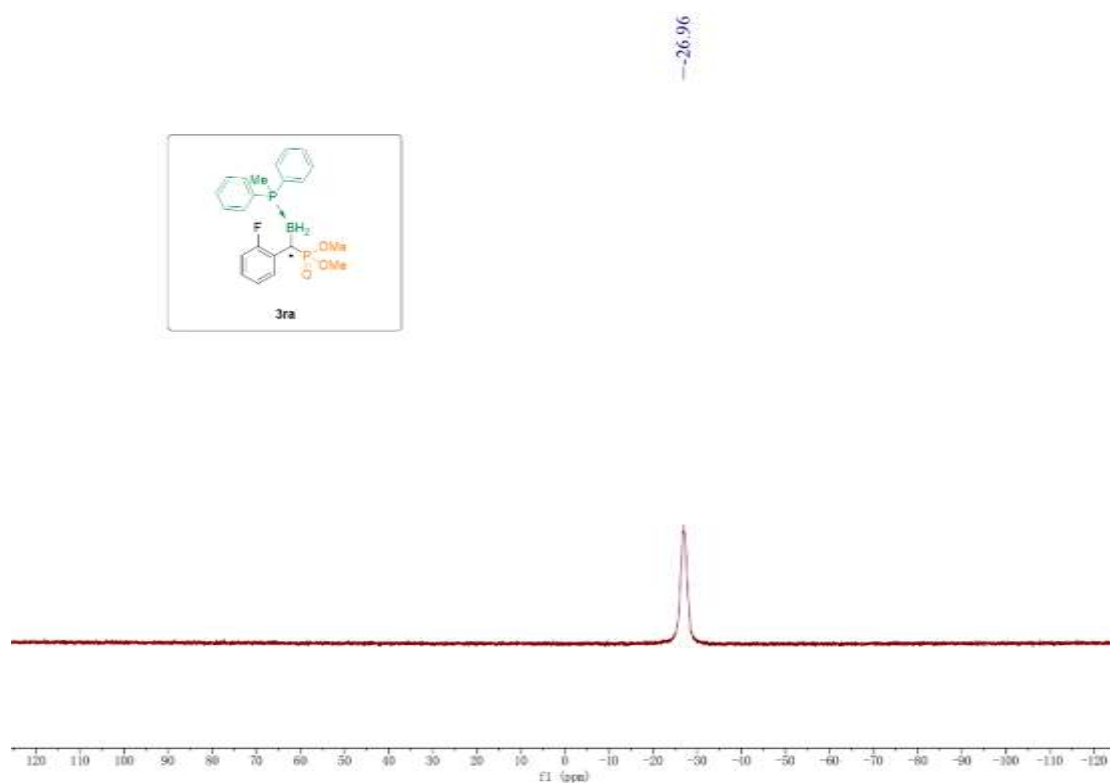

**$^{31}\text{P}$  NMR (202 MHz, Chloroform-*d*)**

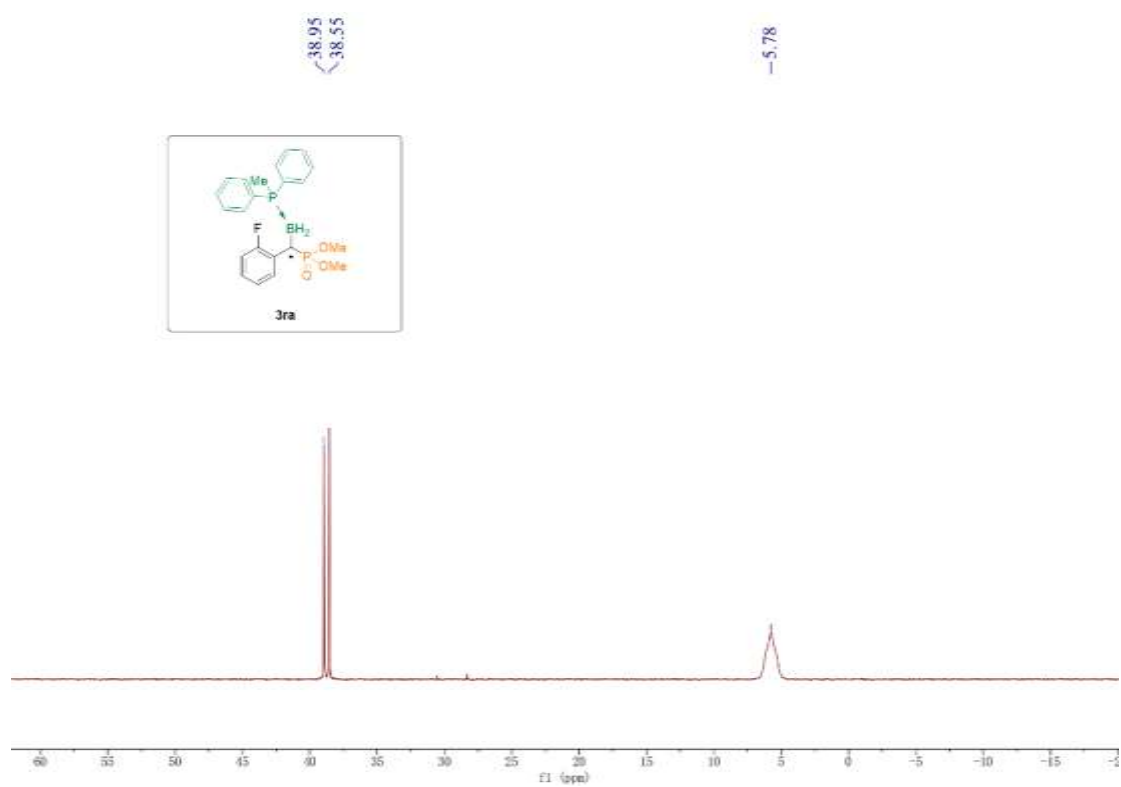

**$^{19}\text{F}$  NMR (471 MHz, Chloroform-*d*)**

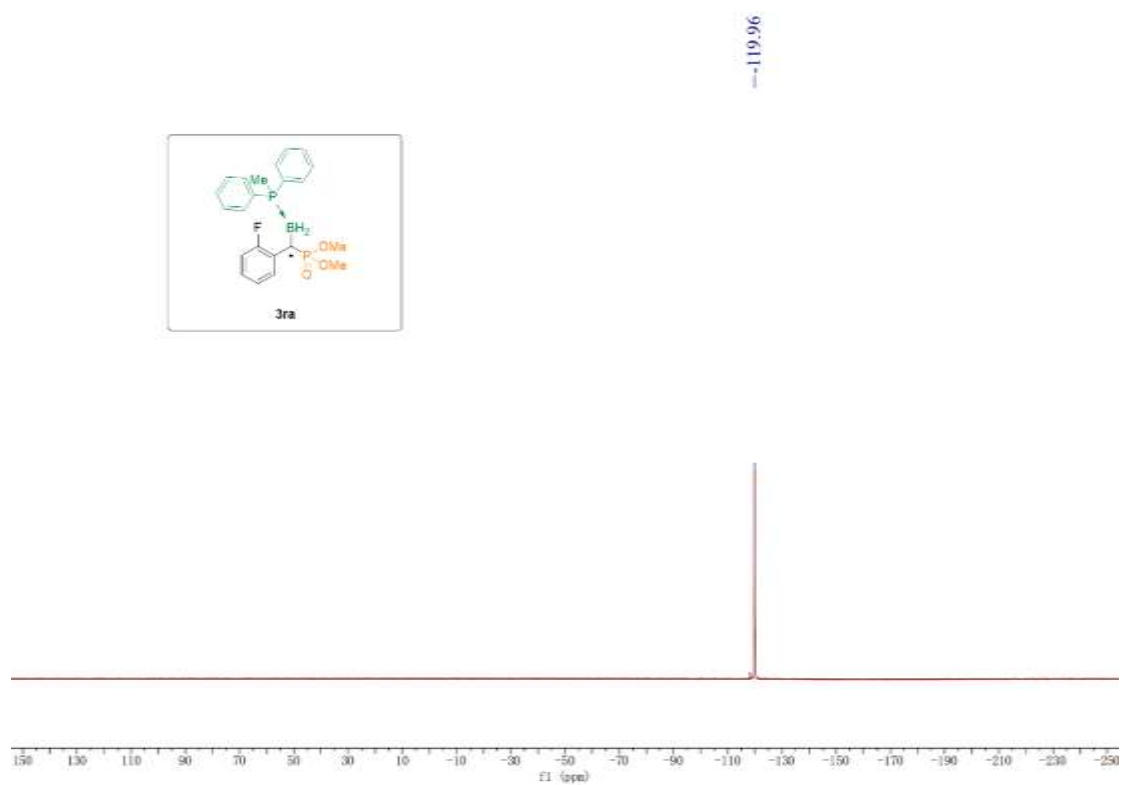

**(S)-dimethyl(((methylphenylphosphane)boryl)(3-chloro-4-fluorophenyl)methyl)  
phosphonate(3sa)**

**<sup>1</sup>H NMR (400 MHz, Chloroform-*d*)**

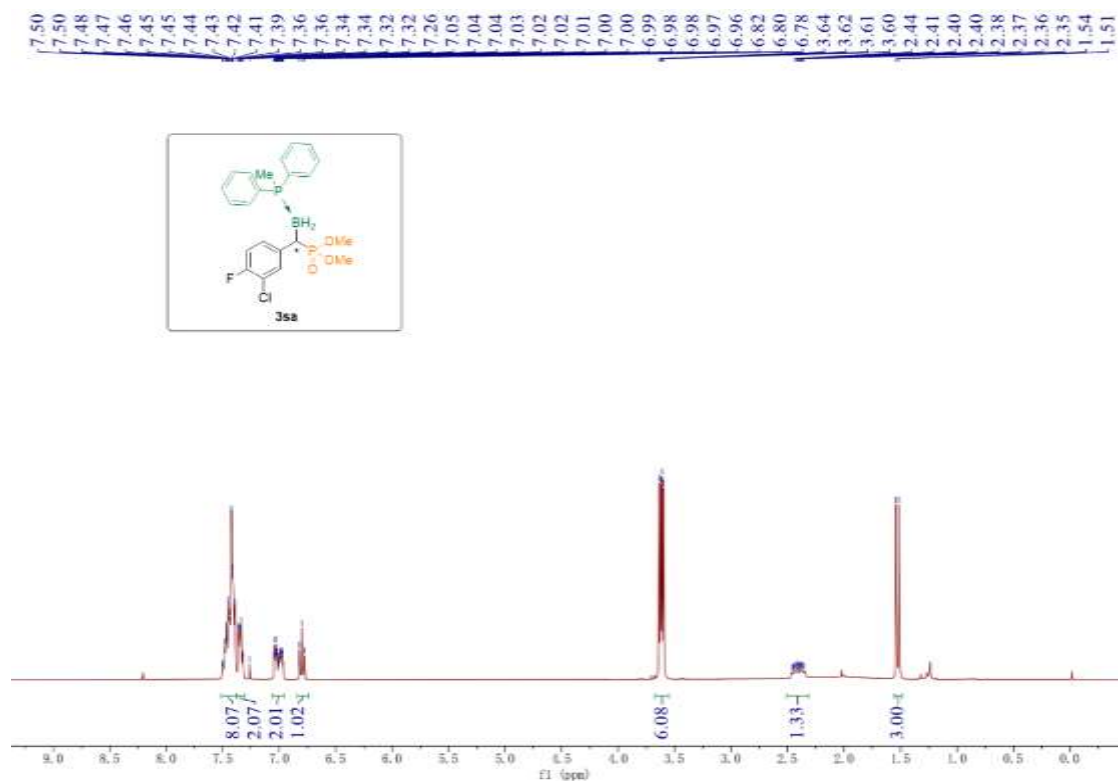

**<sup>13</sup>C NMR (101 MHz, Chloroform-*d*)**

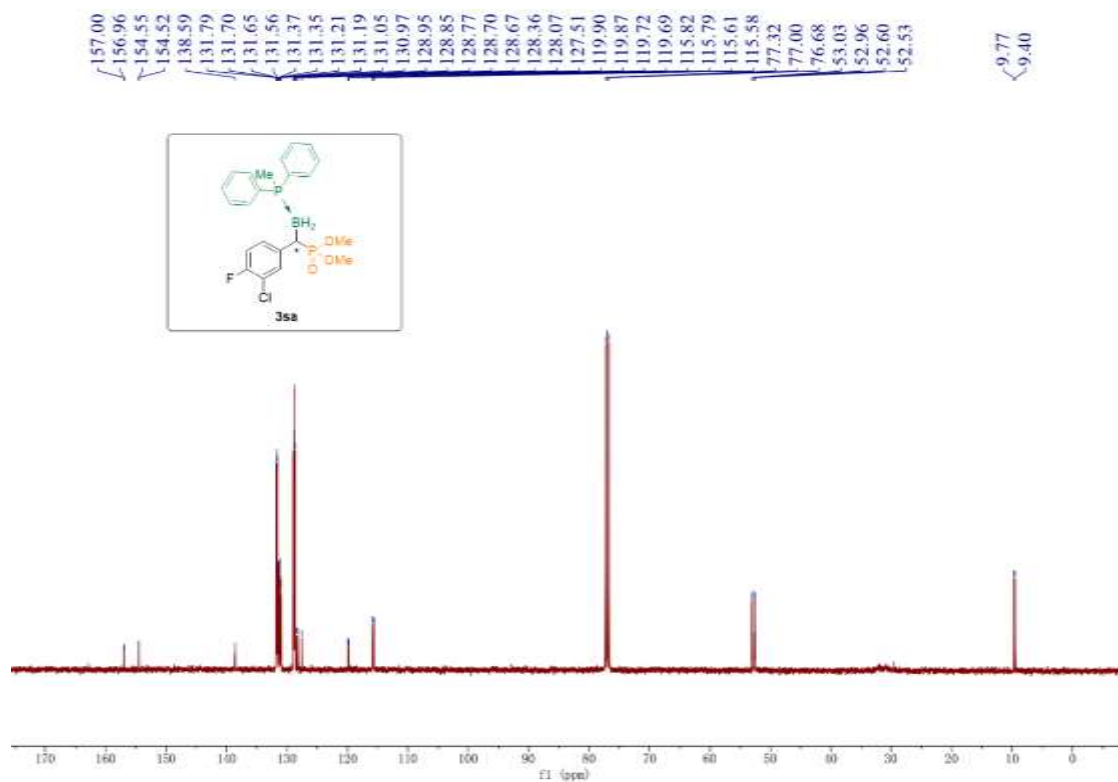





$^{19}\text{F}$  NMR (376 MHz, Chloroform-*d*)

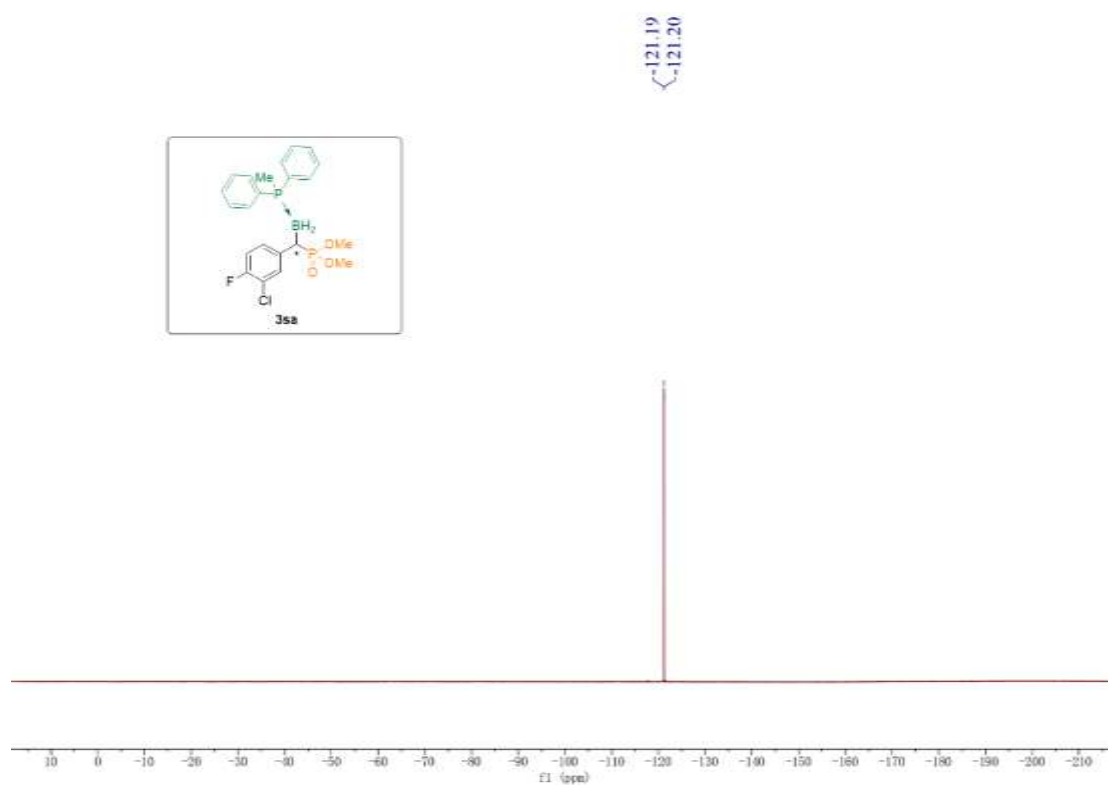

(S)-dimethyl(((methylphenylphosphane)boryl)(4-methyl-3-nitrophenyl)methyl)

phosphonate(3ta)

$^1\text{H}$  NMR (400 MHz, Chloroform-*d*)

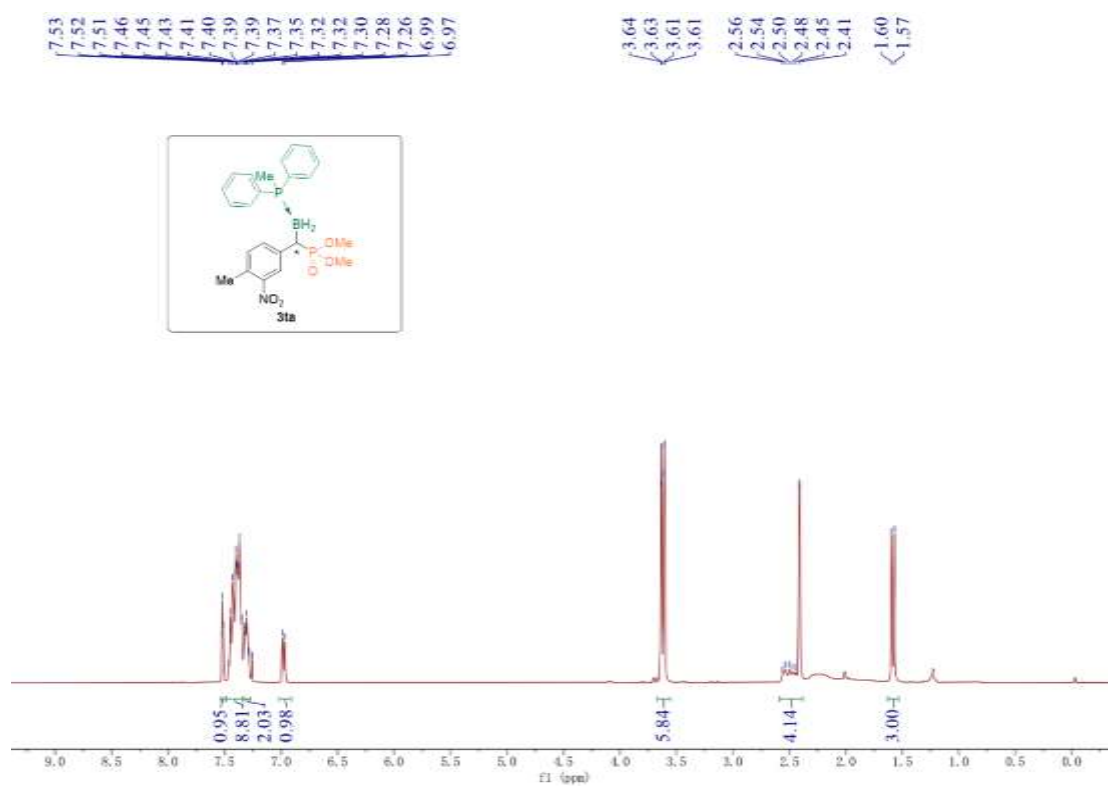

**<sup>13</sup>C NMR (101 MHz, Chloroform-*d*)**

148.39  
148.36  
141.33  
141.27  
141.24  
141.19  
134.10  
134.03  
132.13  
132.10  
131.76  
131.67  
131.57  
131.29  
131.26  
131.06  
131.03  
129.73  
129.71  
128.90  
128.80  
128.75  
128.65  
128.60  
128.14  
128.02  
127.57  
125.04  
124.95  
77.32  
77.00  
76.68  
52.99  
52.92  
52.60  
52.53

— 19.89

< 9.78  
< 9.41

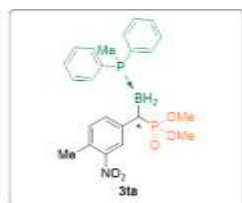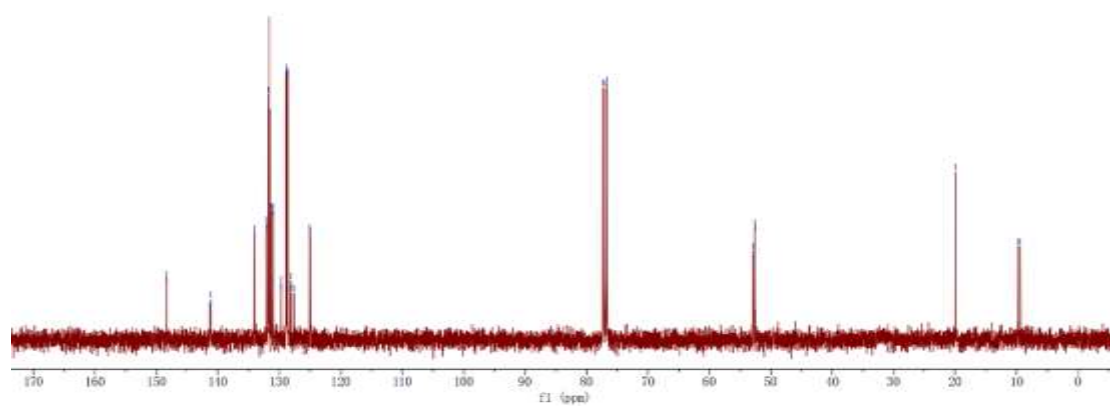

**<sup>11</sup>B NMR (128 MHz, Chloroform-*d*)**

— 26.09

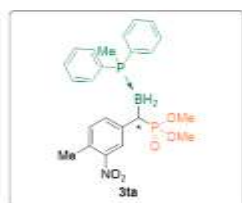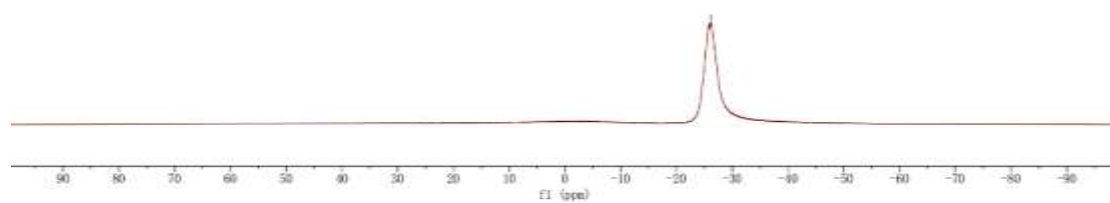

**<sup>31</sup>P NMR (162 MHz, Chloroform-*d*)**

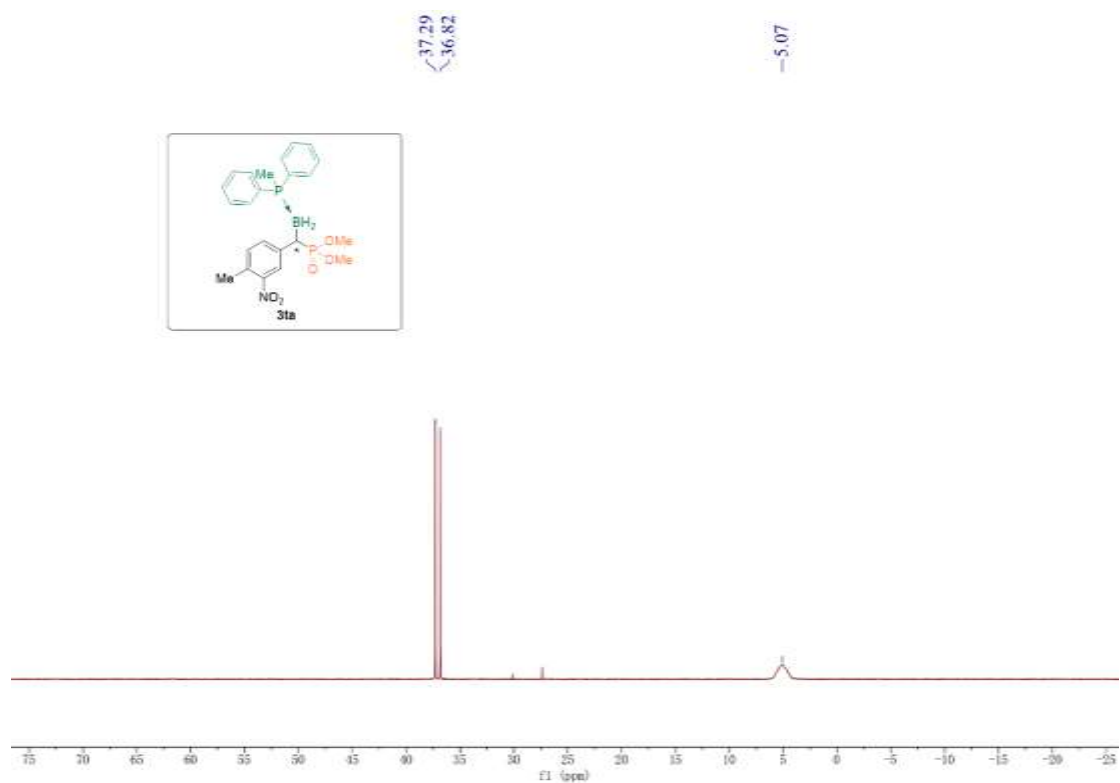

**(S)-dimethyl(((methylphenylphosphane)boryl)(3,5-dimethoxyphenyl)methyl)phosphonate(3ua)**

**<sup>1</sup>H NMR (400 MHz, Chloroform-*d*)**

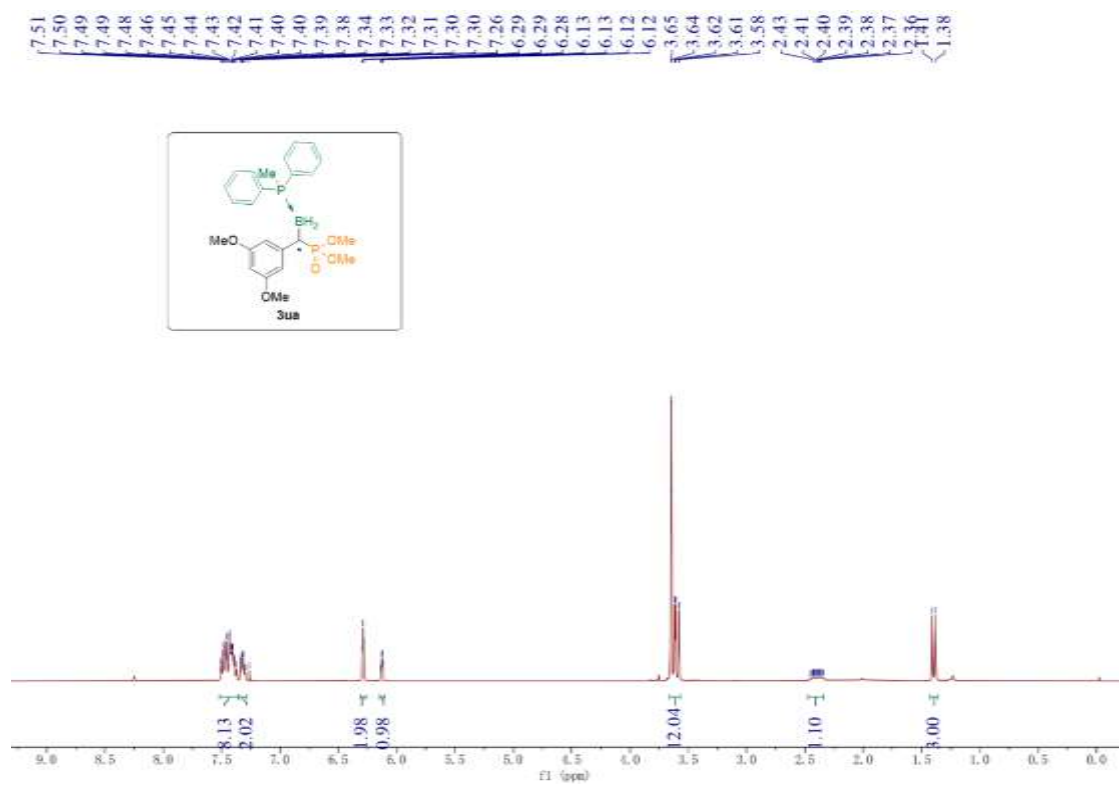



**<sup>31</sup>P NMR (162 MHz, Chloroform-*d*)**

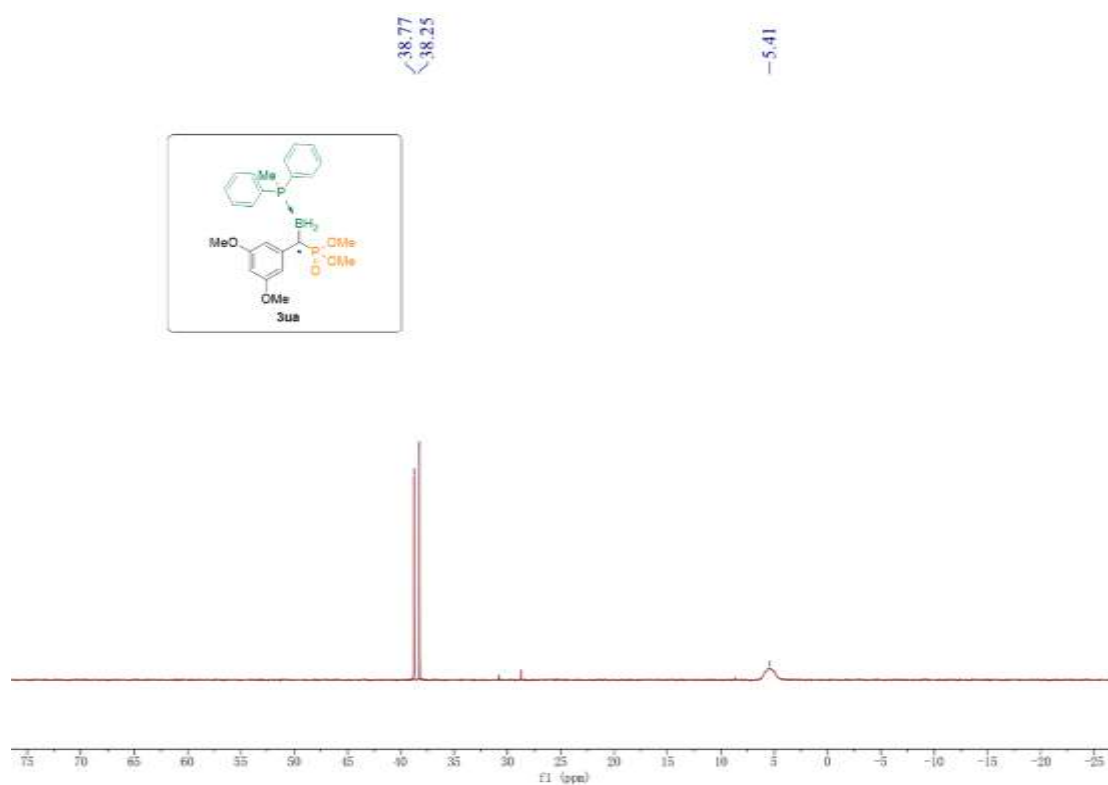

**(S)-dimethyl(((methylphenylphosphane)boron)phenyl)methylphosphonate(3va)**

**<sup>1</sup>H NMR (400 MHz, Chloroform-*d*)**

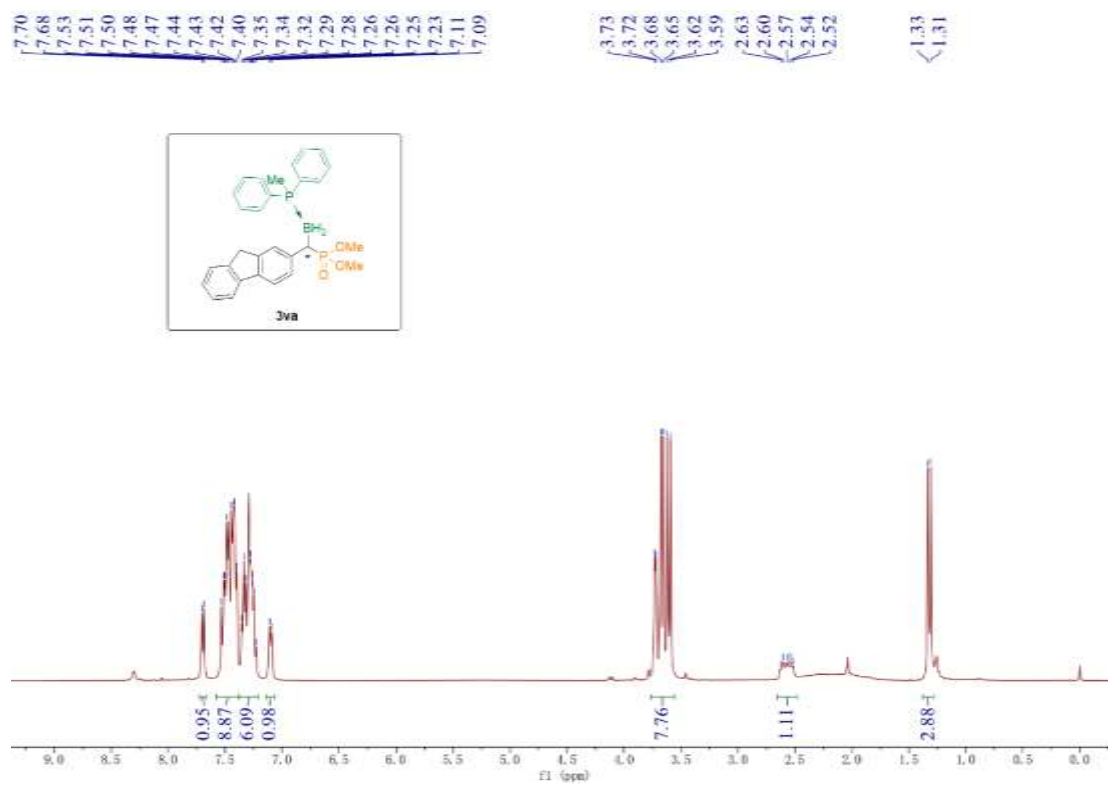

**<sup>13</sup>C NMR (101 MHz, Chloroform-*d*)**

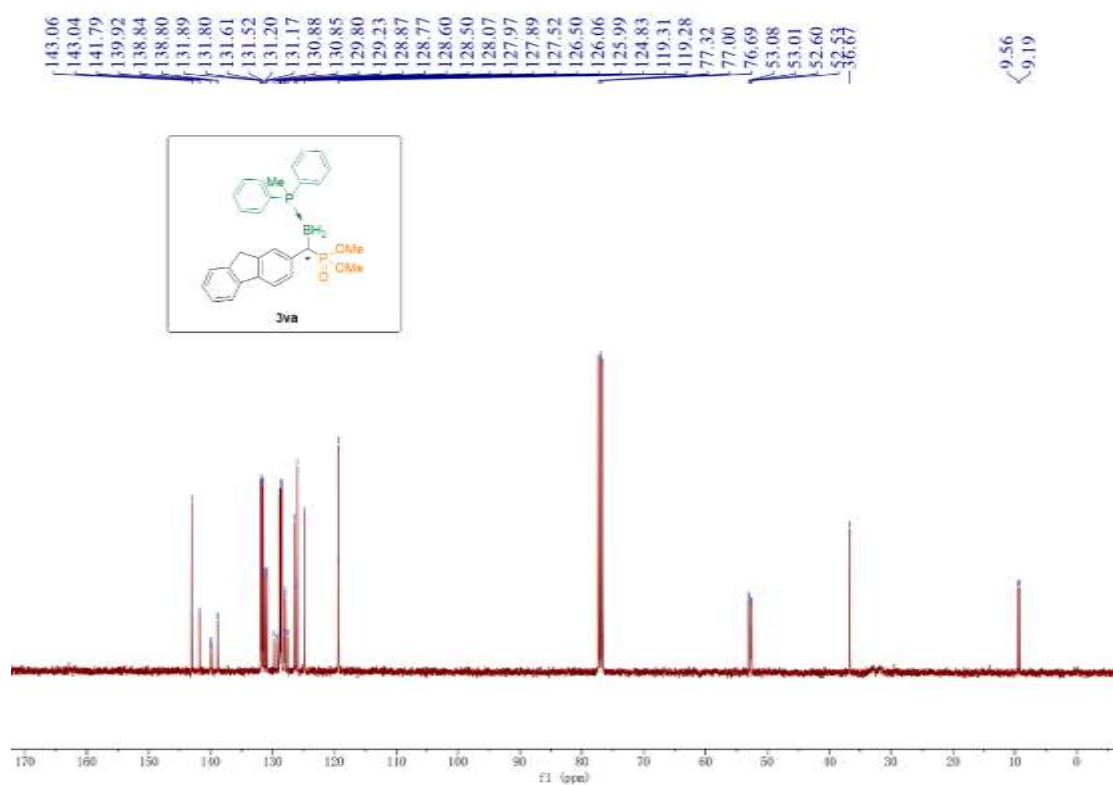

**<sup>11</sup>B NMR (128 MHz, Chloroform-*d*)**

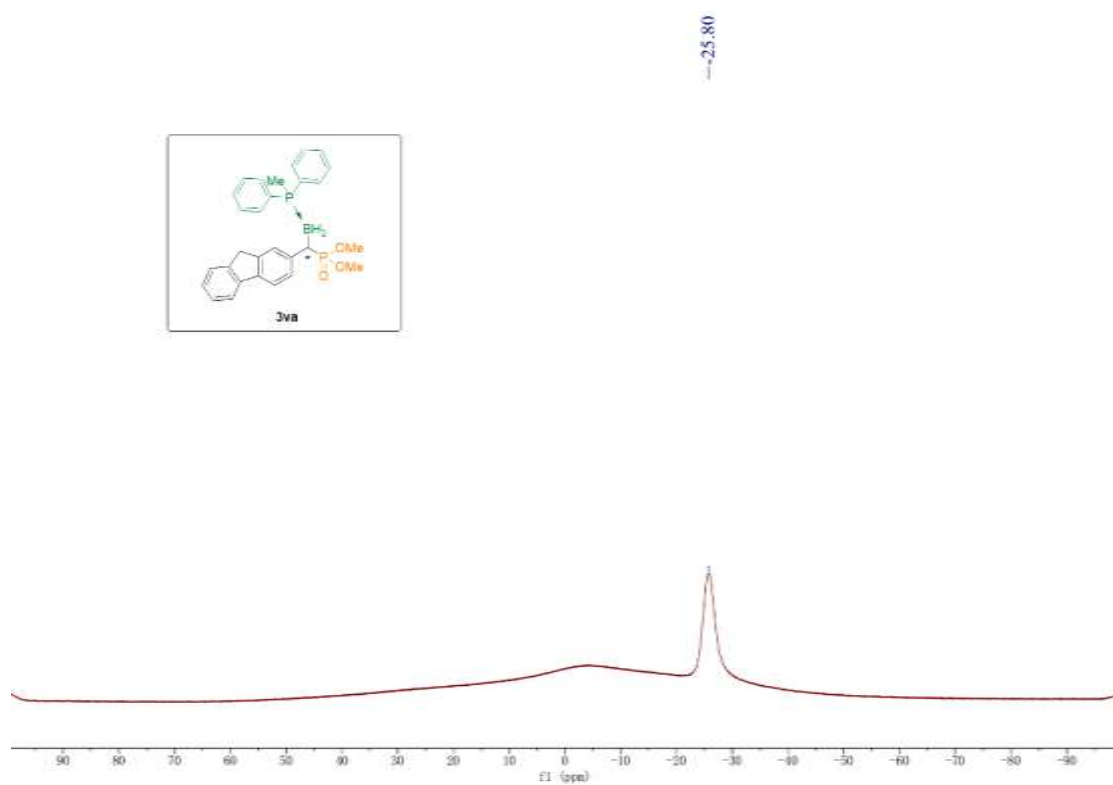

**<sup>31</sup>P NMR (162 MHz, Chloroform-*d*)**

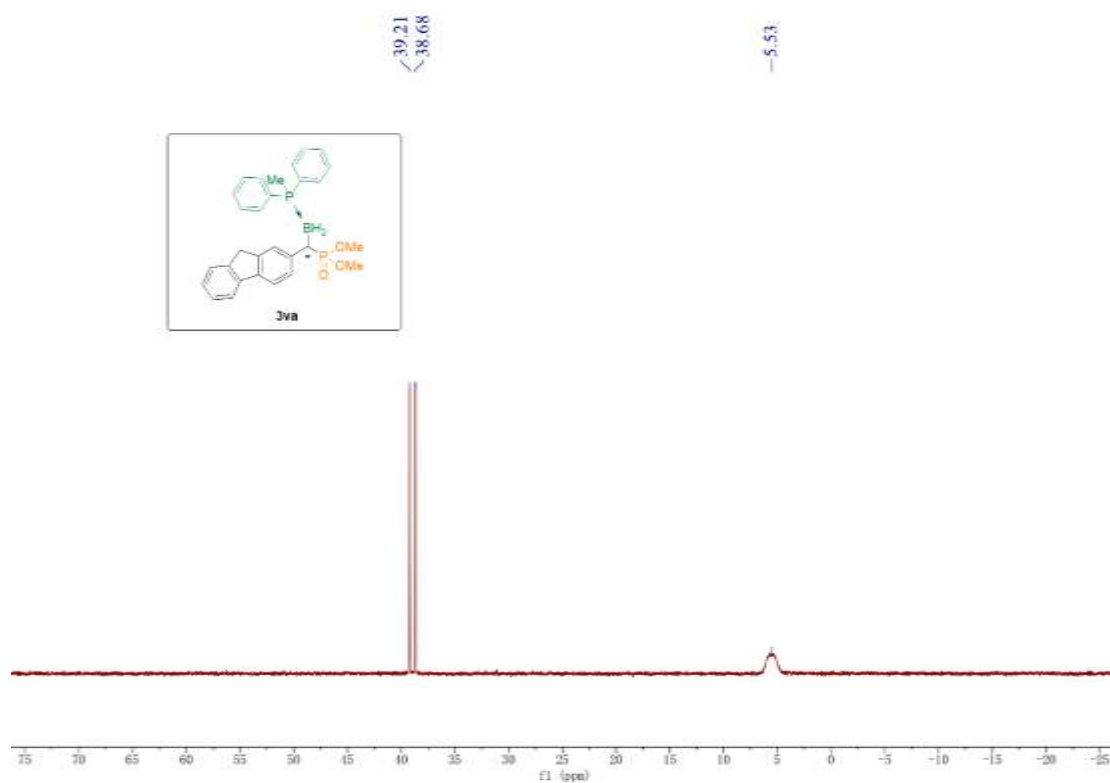

**(S)-dimethyl(((methylphenylphosphane)boryl)(1H-indol-5-yl)methyl)phosphonate(3va)**

**<sup>1</sup>H NMR (400 MHz, Chloroform-*d*)**

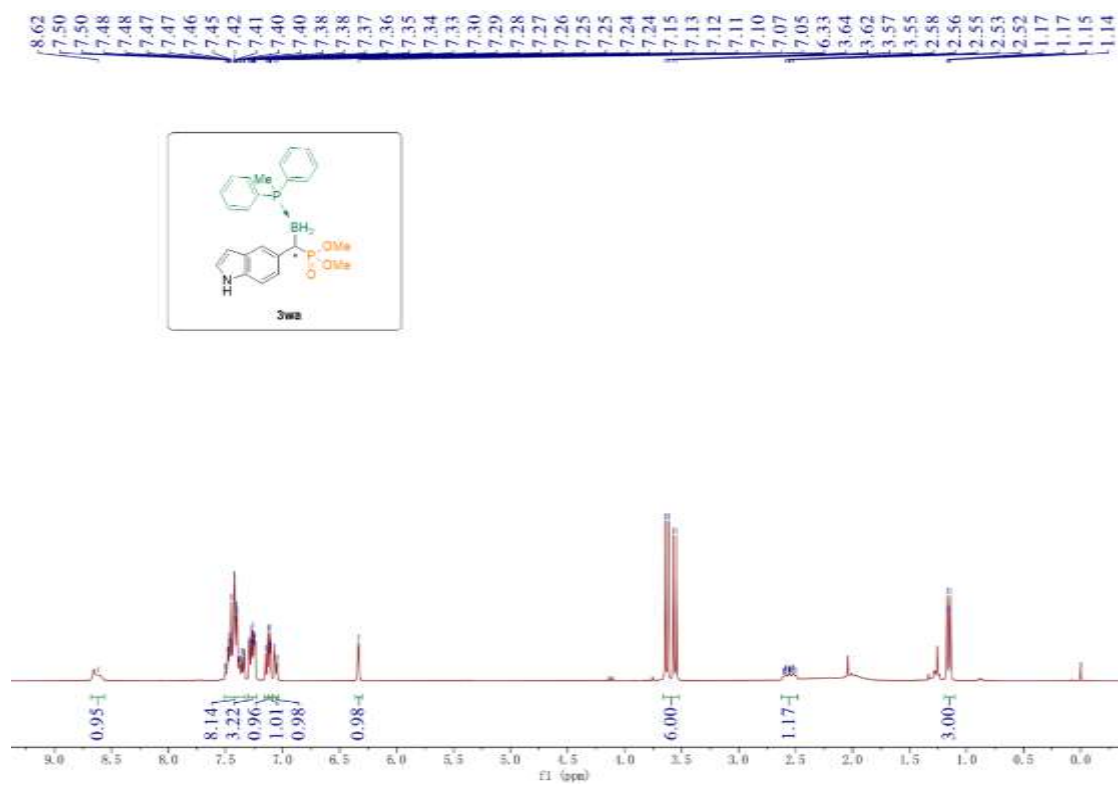

**$^{13}\text{C}$  NMR (101 MHz, Chloroform-*d*)**

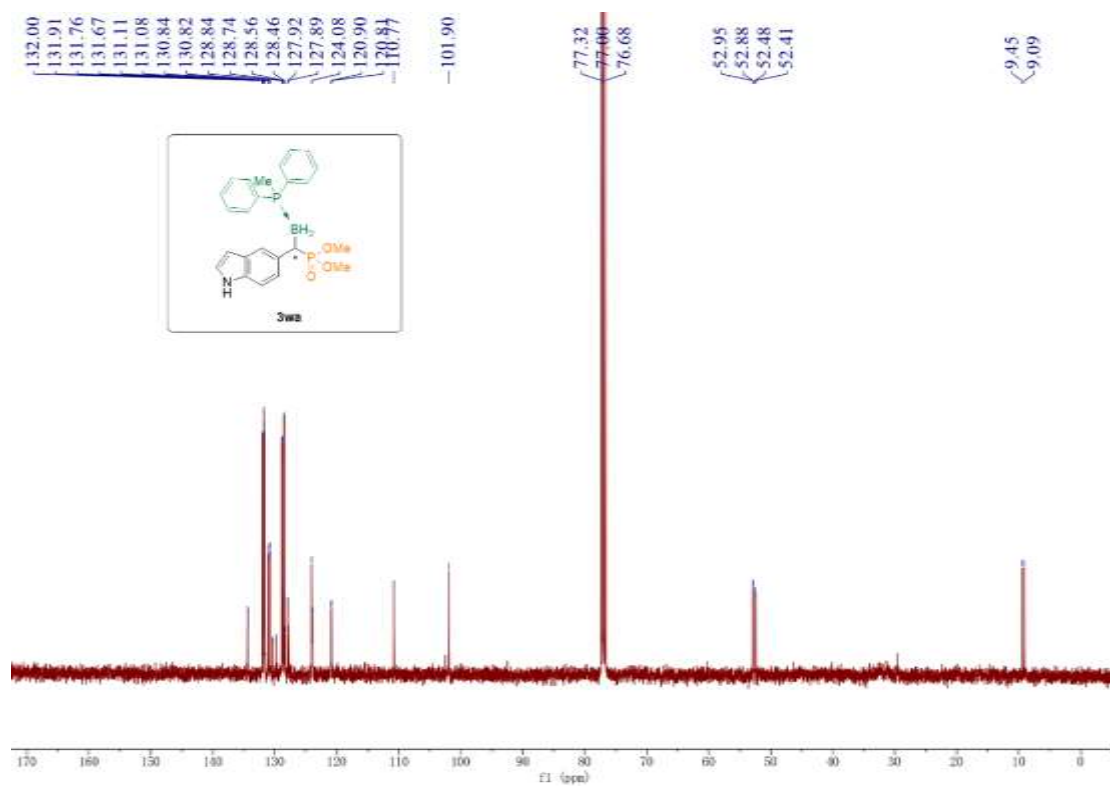

**$^{11}\text{B}$  NMR (128 MHz, Chloroform-*d*)**

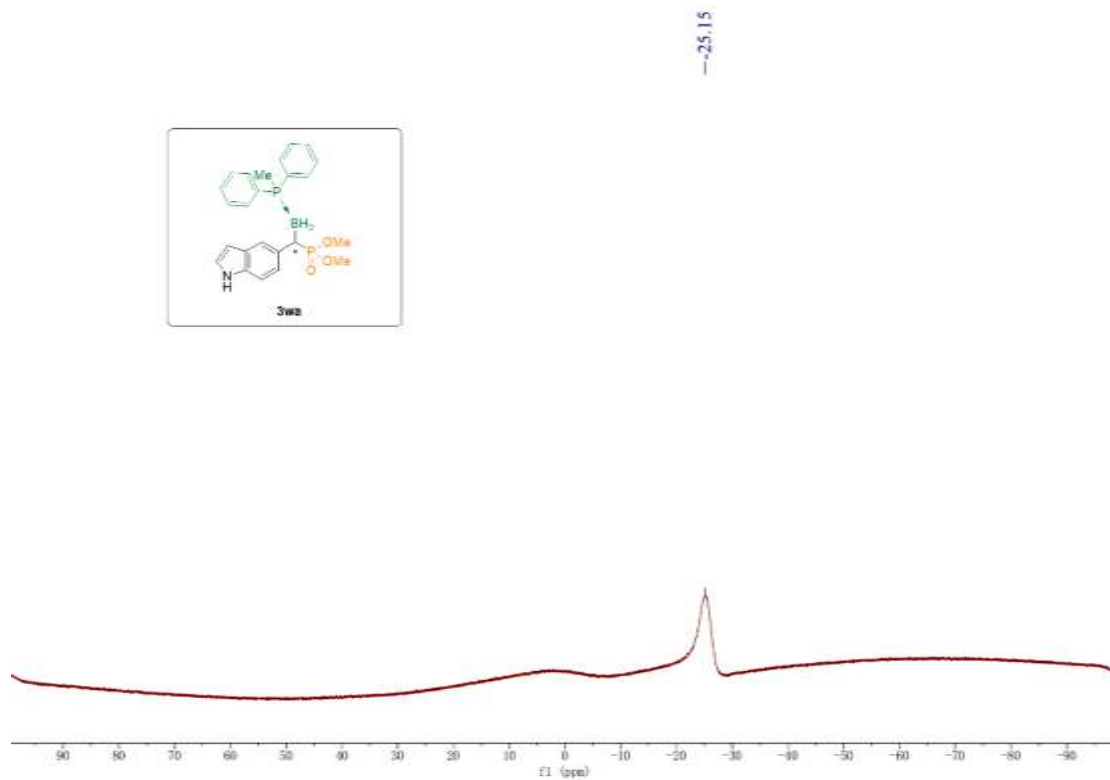



**<sup>31</sup>P NMR (162 MHz, Chloroform-*d*)**

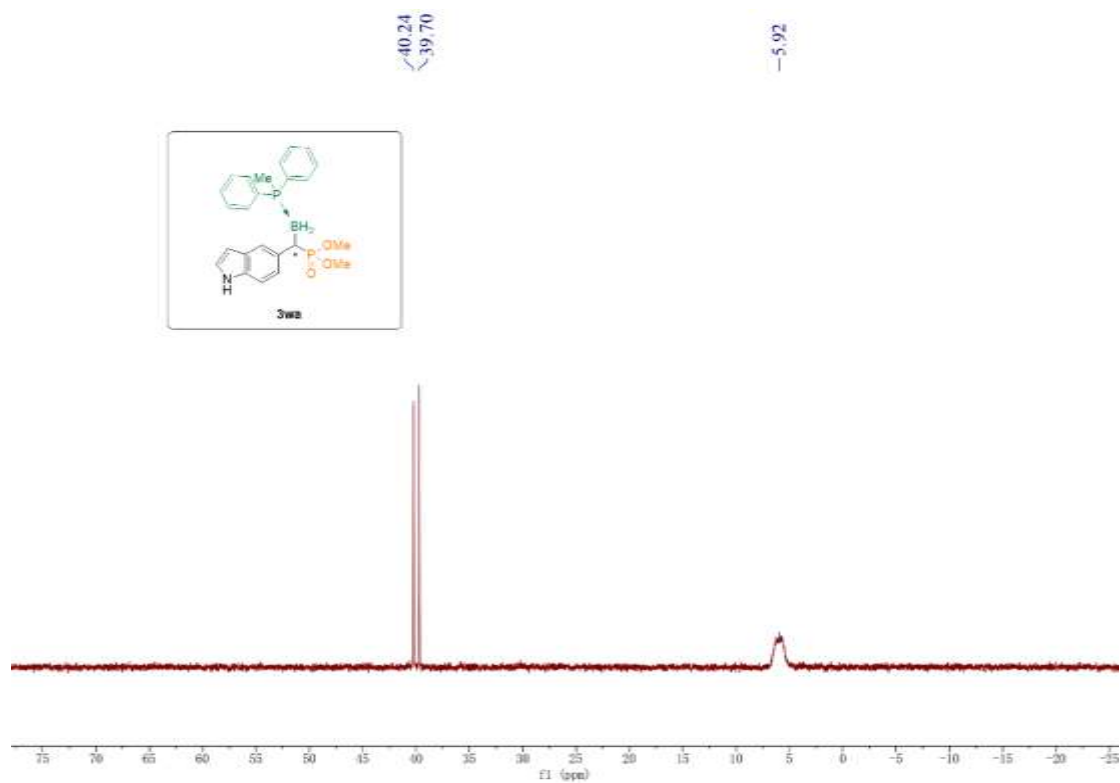

**(S)-dimethyl(((methylphenylphosphane)boryl)(benzo[d][1,3]dioxol-5-yl)methyl)phosphonate(3xa)**

**<sup>1</sup>H NMR (500 MHz, Chloroform-*d*)**

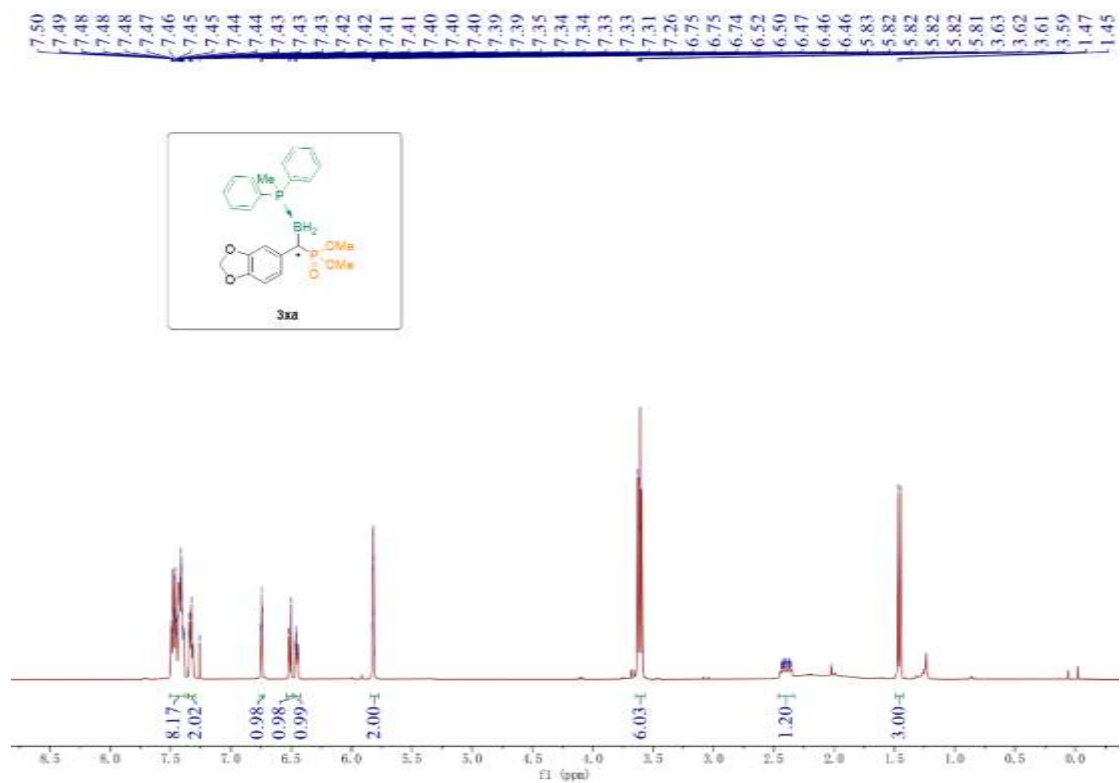

**<sup>13</sup>C NMR (126 MHz, Chloroform-*d*)**

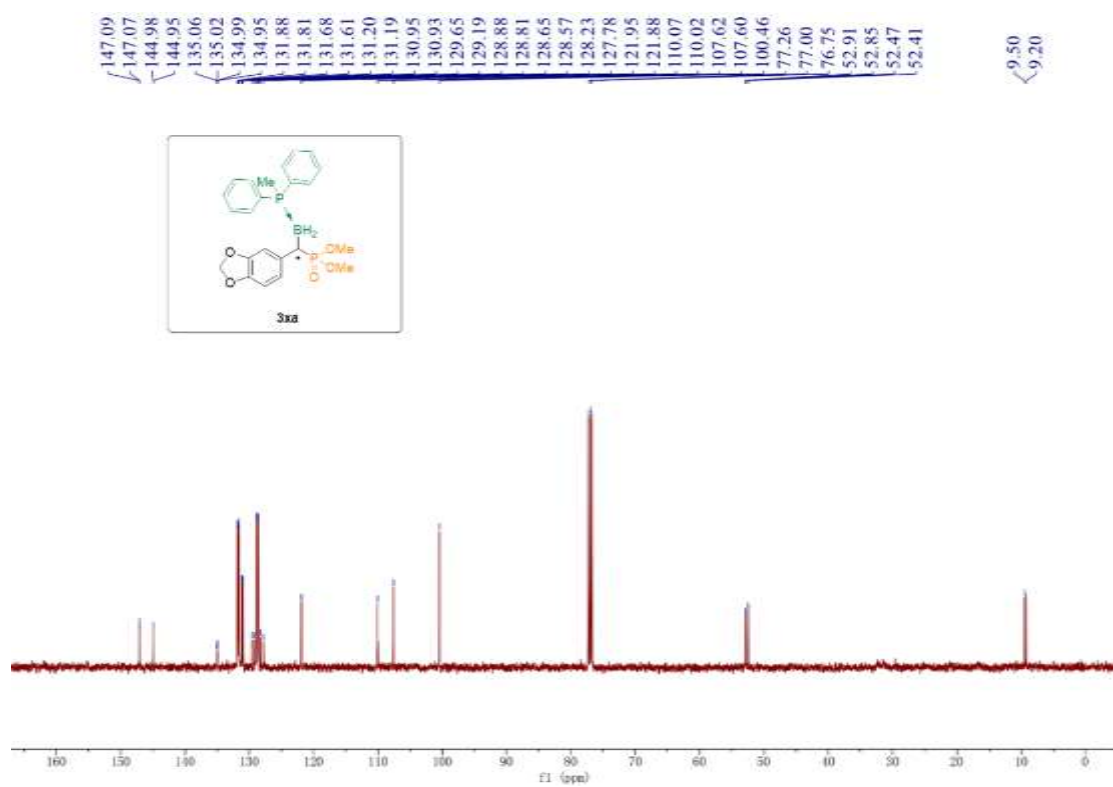

**<sup>11</sup>B NMR (160 MHz, Chloroform-*d*)**

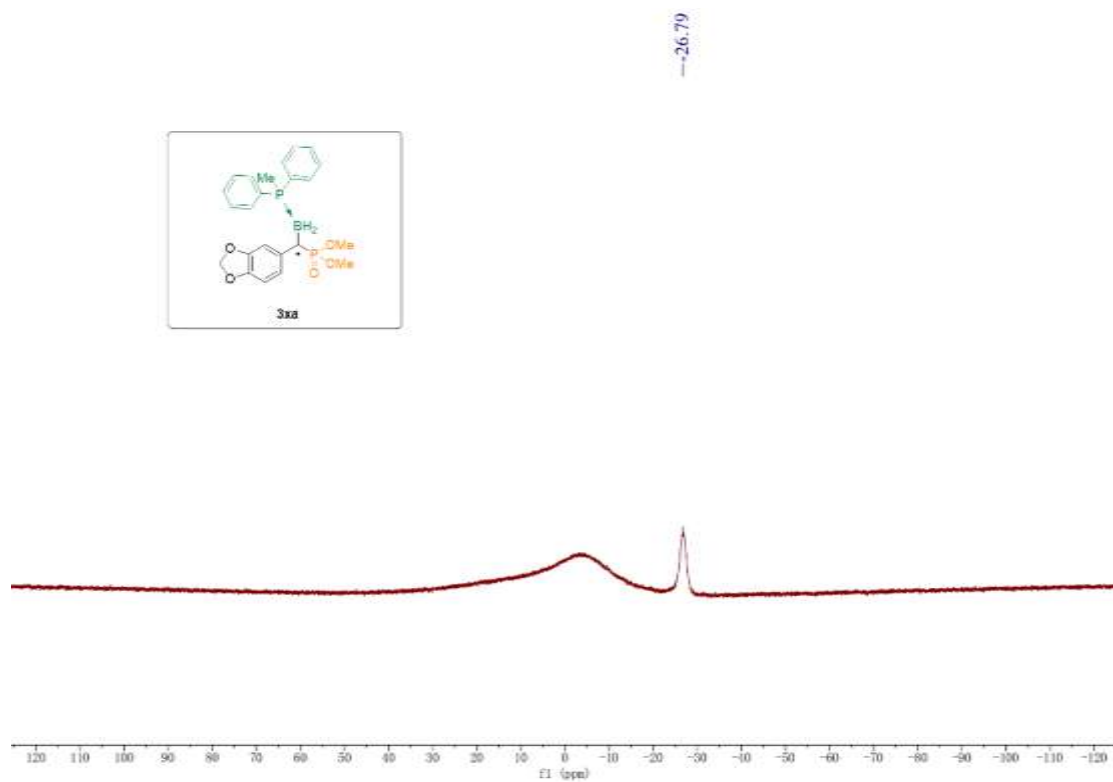

<sup>31</sup>P NMR (202 MHz, Chloroform-*d*)

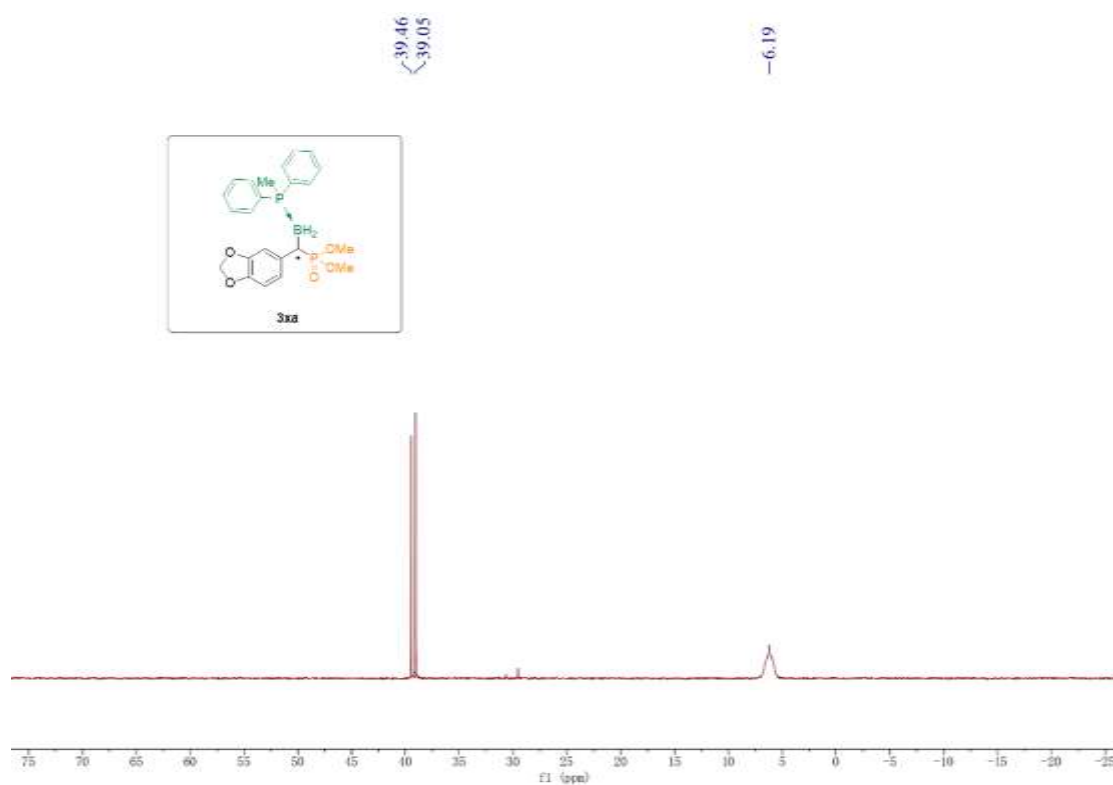

(S)-dimethyl(((methylphenylphosphane)boryl)(dibenzo[b,d]furan-1-yl)methyl)phosphonate(**3ya**)

<sup>1</sup>H NMR (400 MHz, Chloroform-*d*)

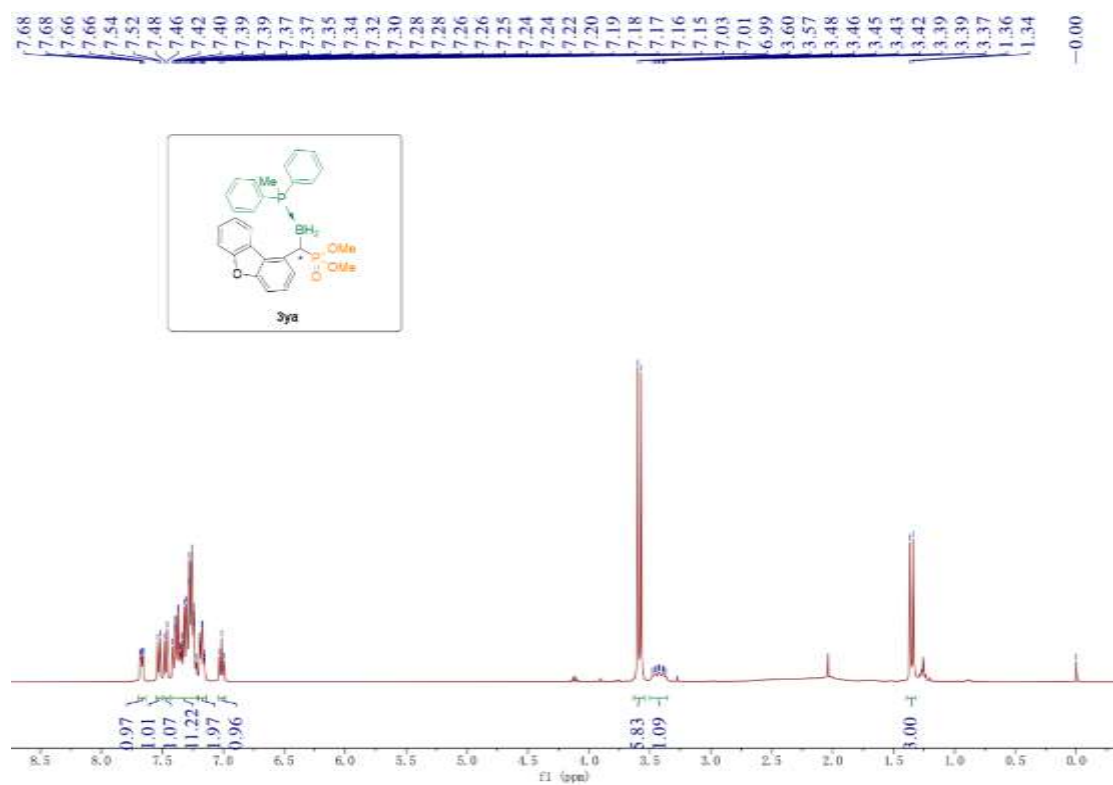

**<sup>13</sup>C NMR (101 MHz, Chloroform-*d*)**

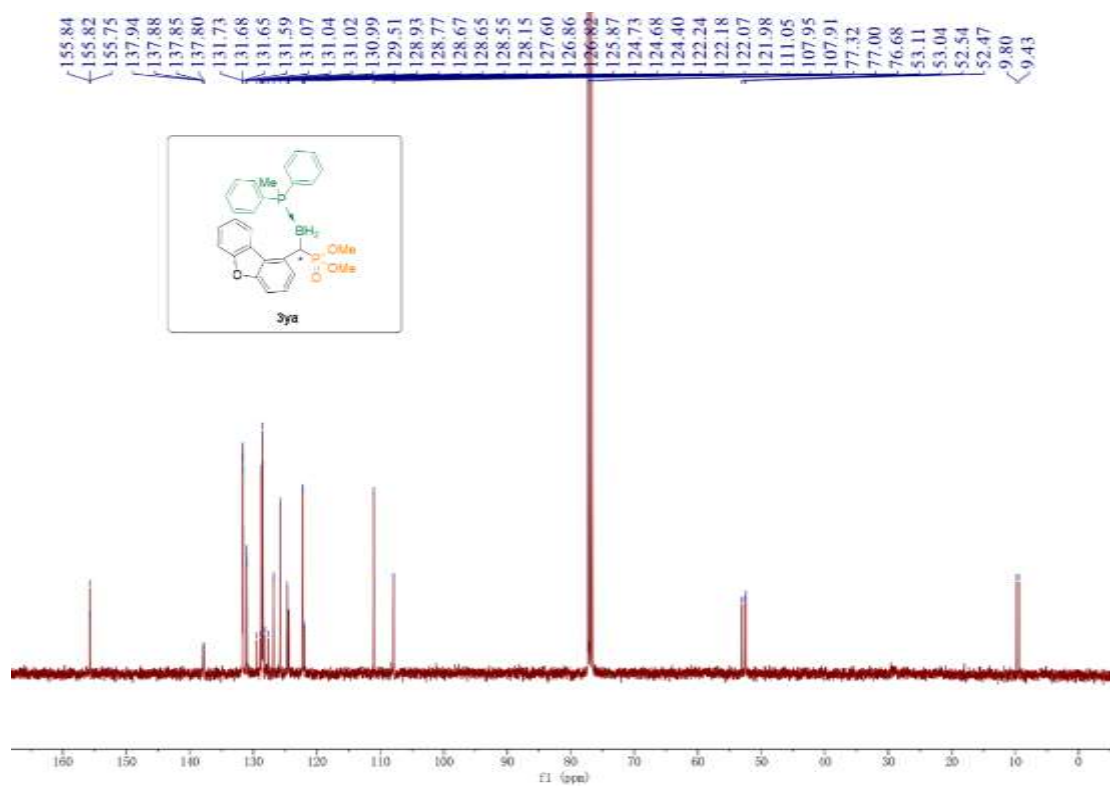

**<sup>11</sup>B NMR (128 MHz, Chloroform-*d*)**

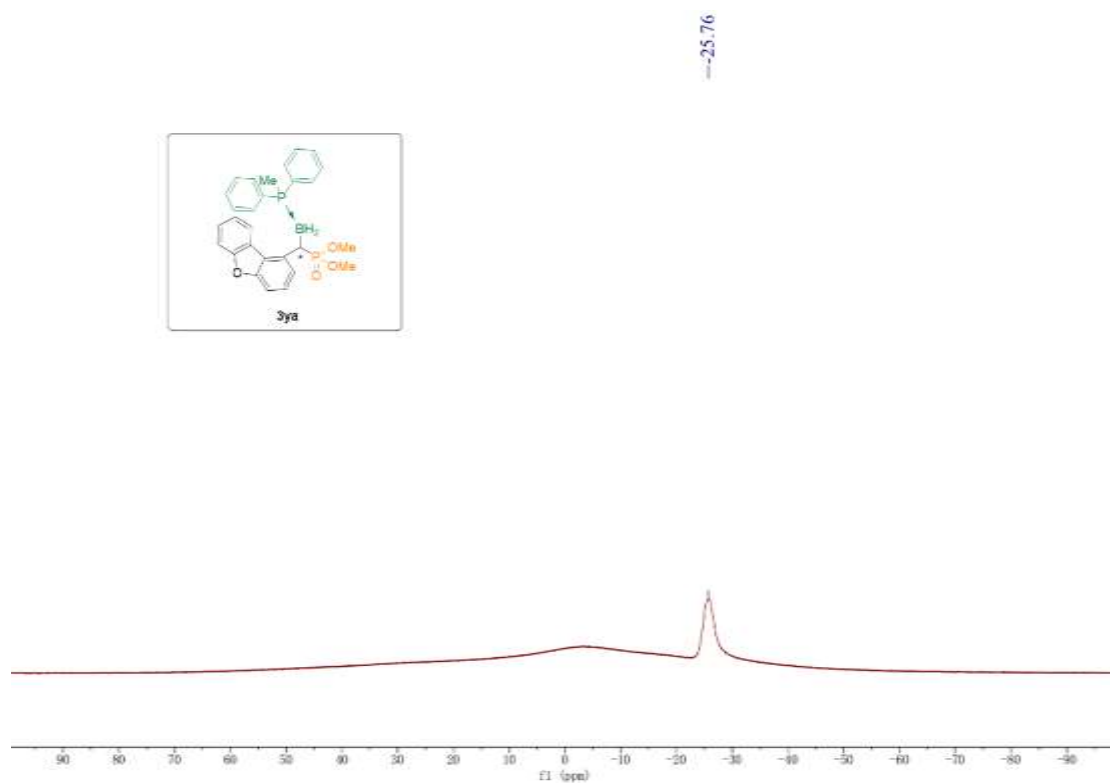

**<sup>31</sup>P NMR (162 MHz, Chloroform-*d*)**

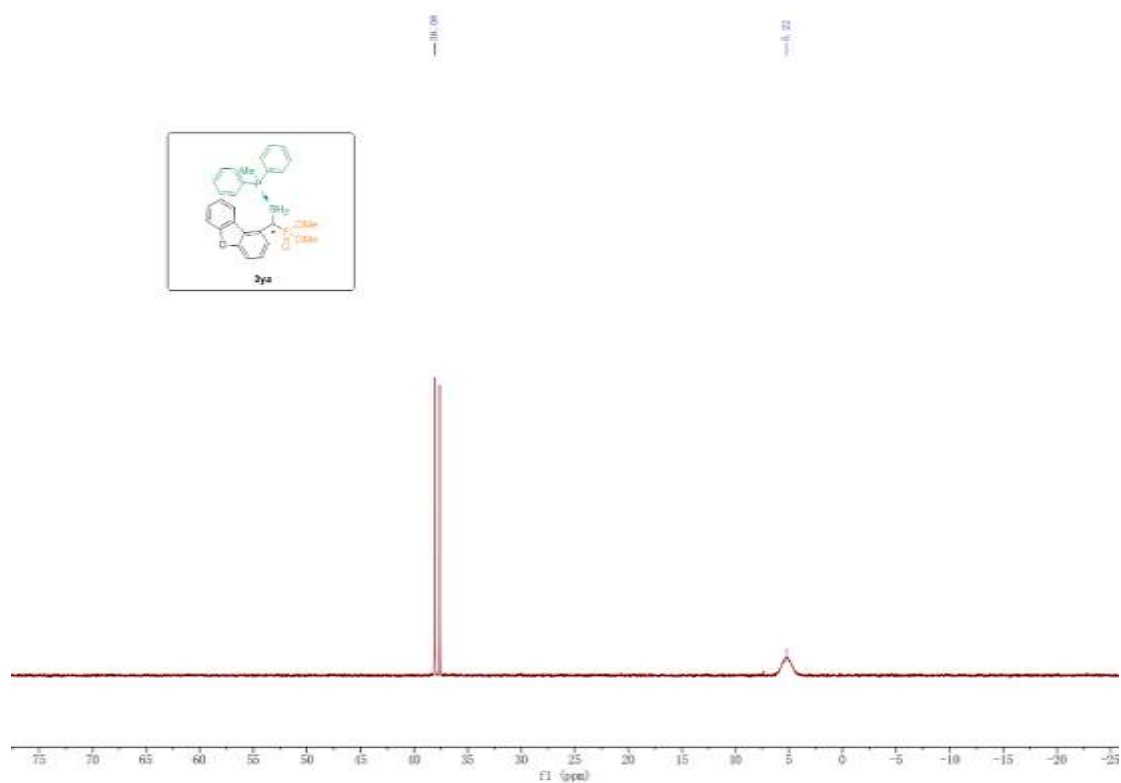

**(S)-dimethyl(((methyldiphenylphosphane)boryl)(dibenzo[b,d]thiophen-4-yl)methyl)**

**phosphonate(3za)**

**<sup>1</sup>H NMR (500 MHz, Chloroform-*d*)**

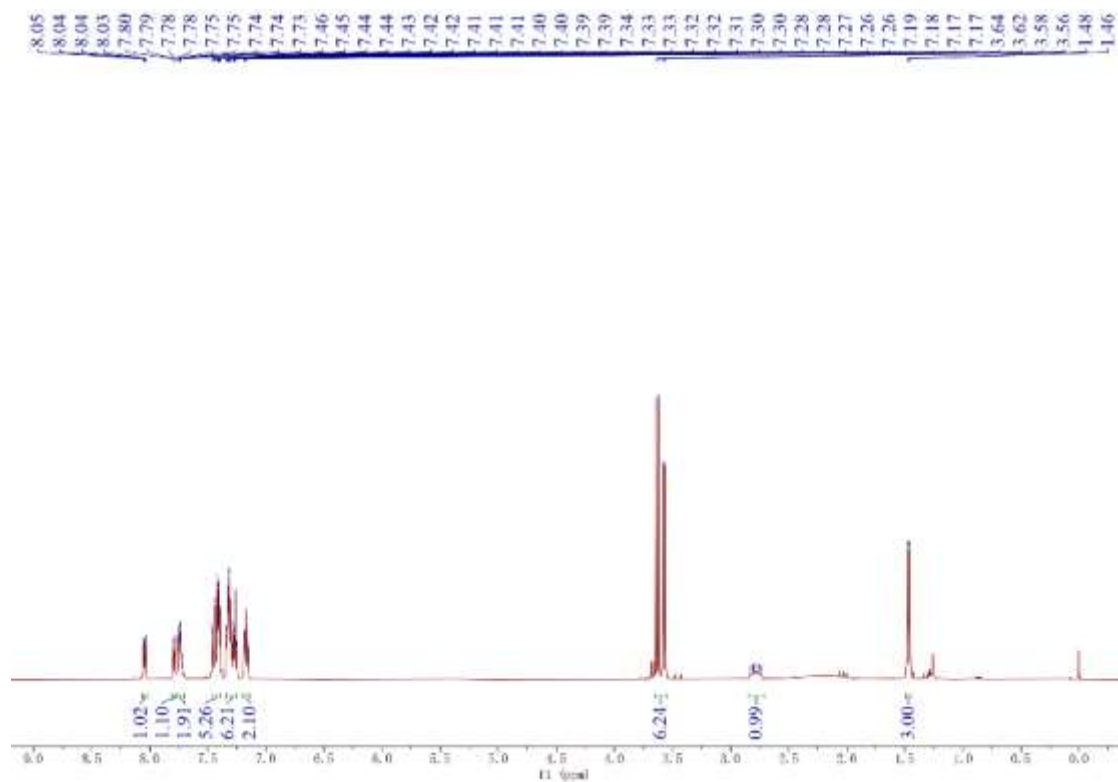

**<sup>13</sup>C NMR (126 MHz, Chloroform-*d*)**

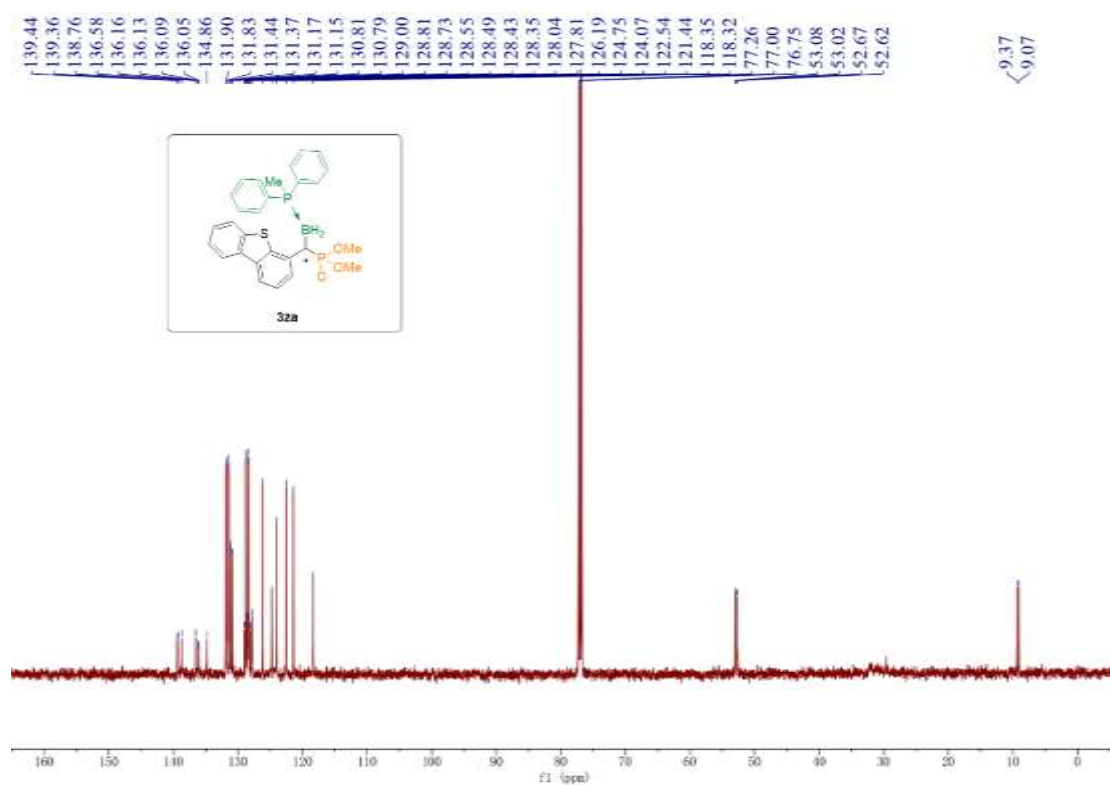

**<sup>11</sup>B NMR (160 MHz, Chloroform-*d*)**

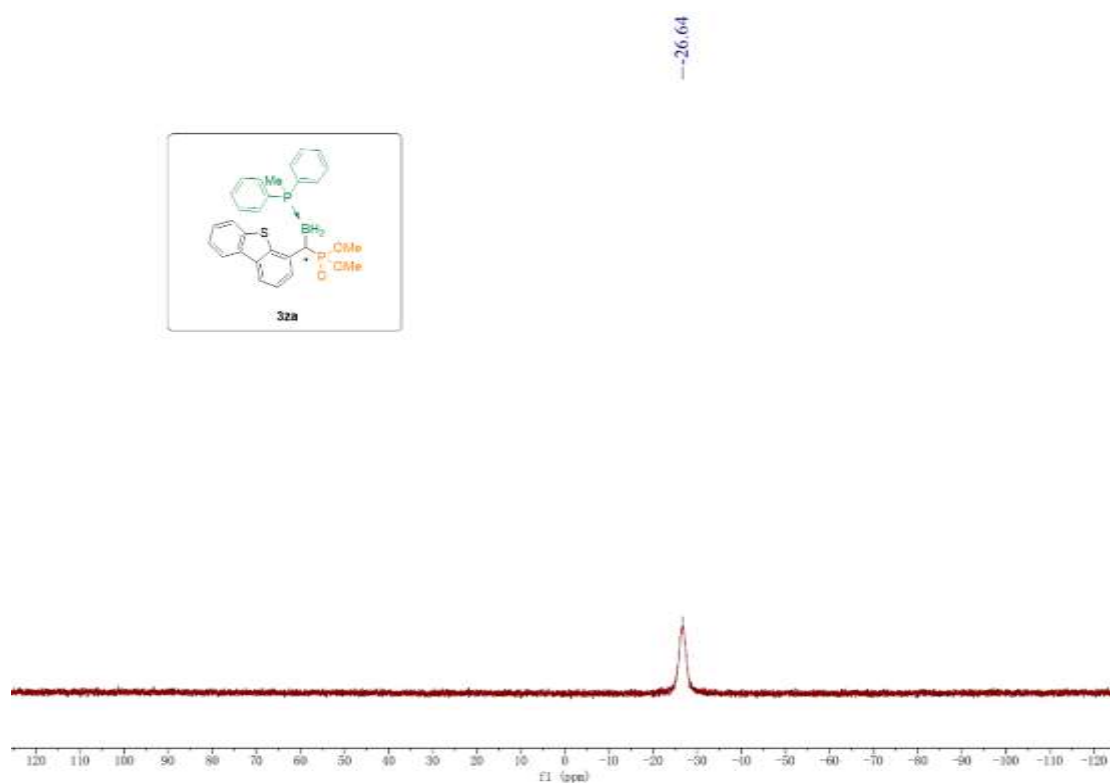

<sup>31</sup>P NMR (202 MHz, Chloroform-*d*)

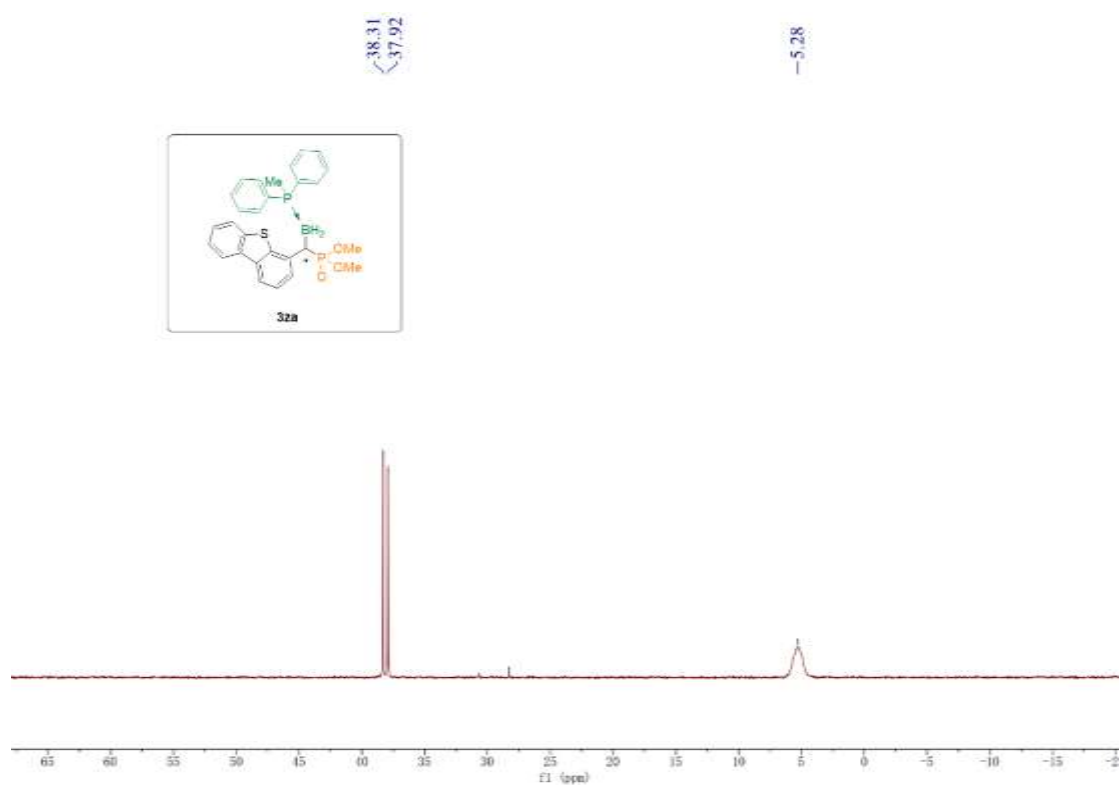

(*S*)-dimethyl(((methylphenylphosphane)boryl)(dibenzo[*b,d*]thiophen-4-yl)methyl)phosphonate(3Aa)

<sup>1</sup>H NMR (400 MHz, Chloroform-*d*)

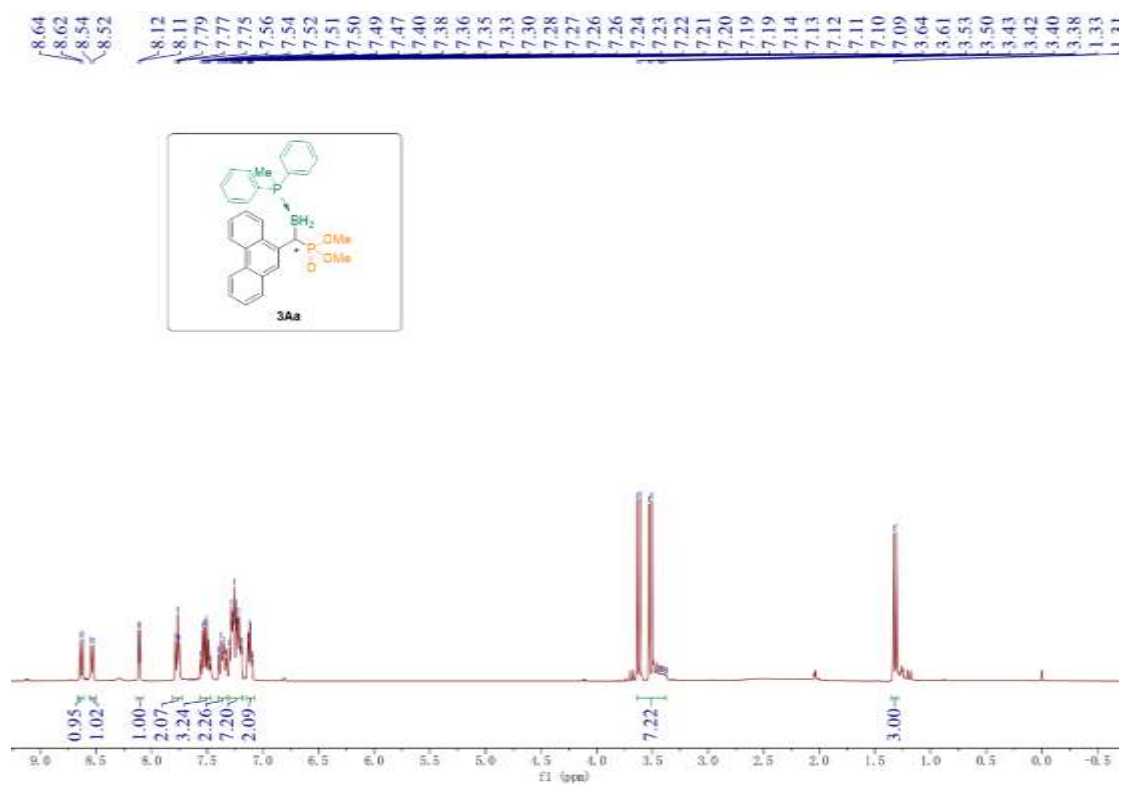

**<sup>13</sup>C NMR (101 MHz, Chloroform-*d*)**

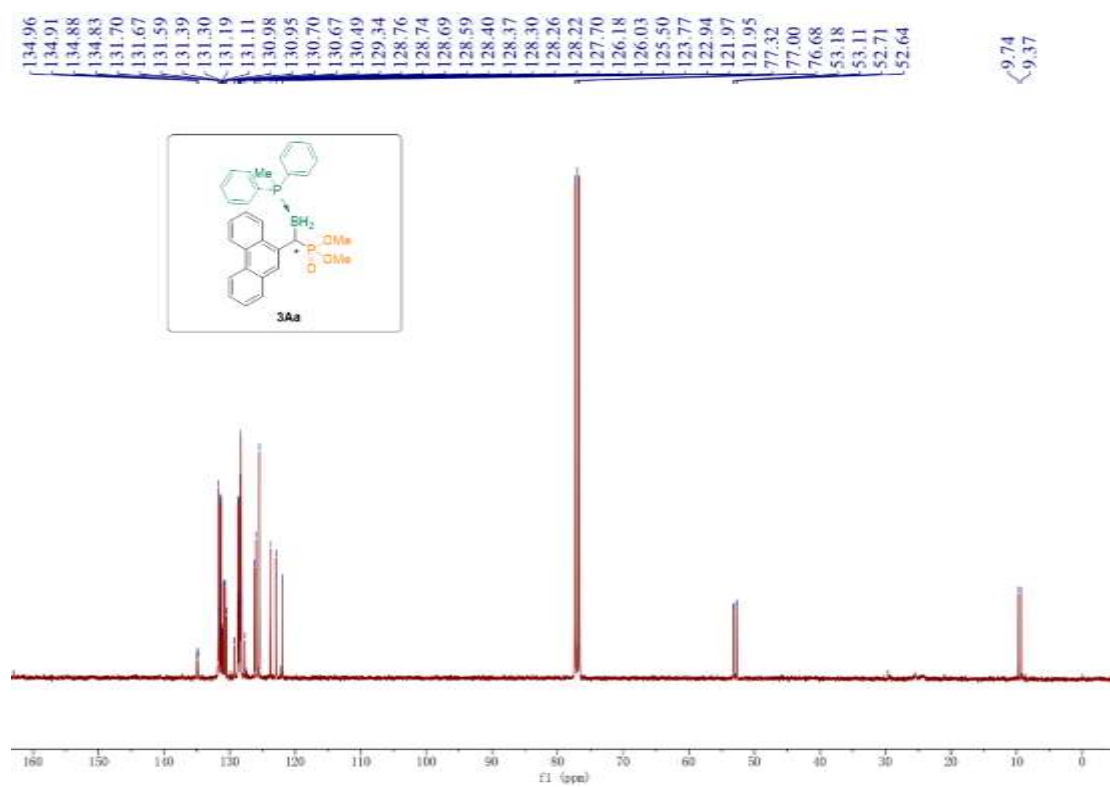

**<sup>11</sup>B NMR (128 MHz, Chloroform-*d*)**

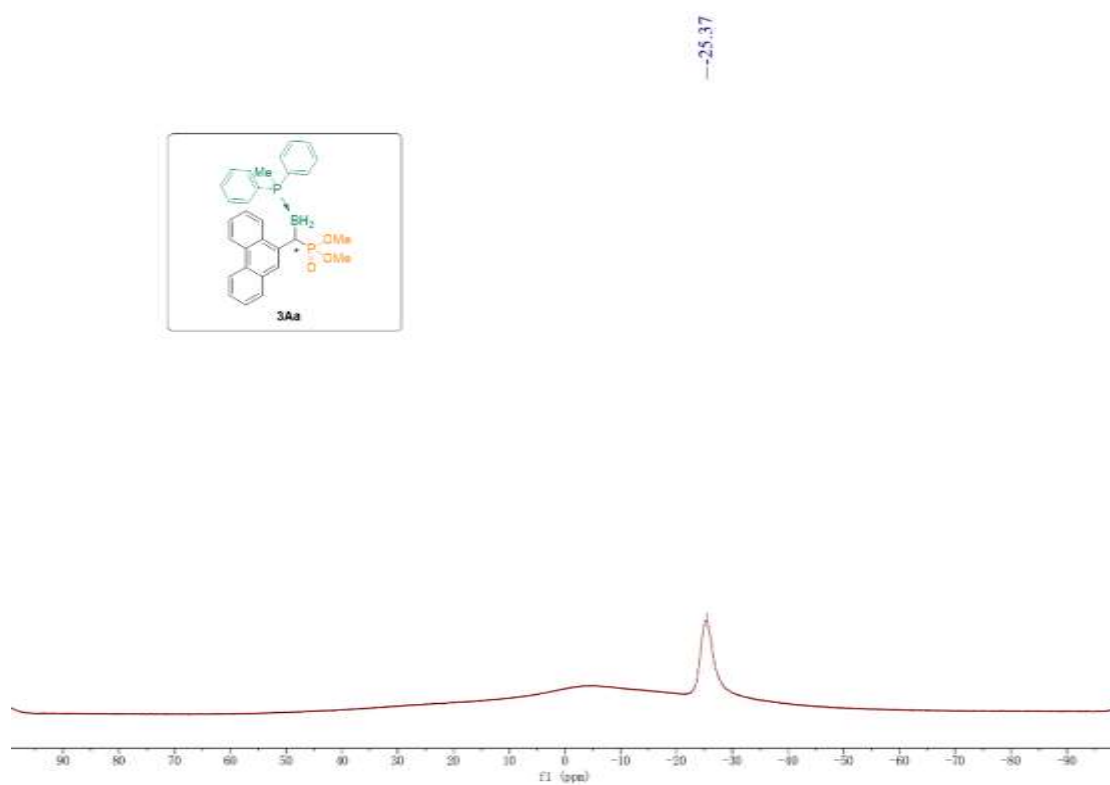



**<sup>31</sup>P NMR (162 MHz, Chloroform-*d*)**

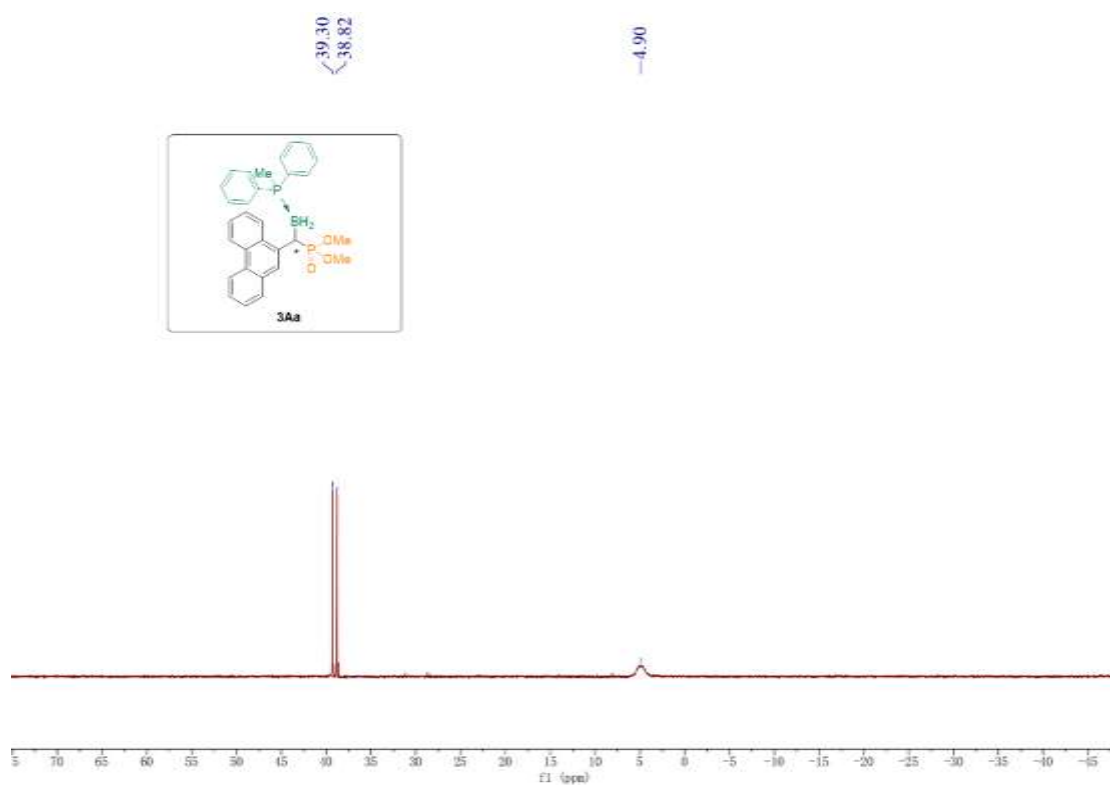

**(S)-dimethyl(((methyl)diphenylphosphane)boryl)(naphthalen-2-yl)methyl)phosphonate(3Ba)**

**<sup>1</sup>H NMR (400 MHz, Chloroform-*d*)**

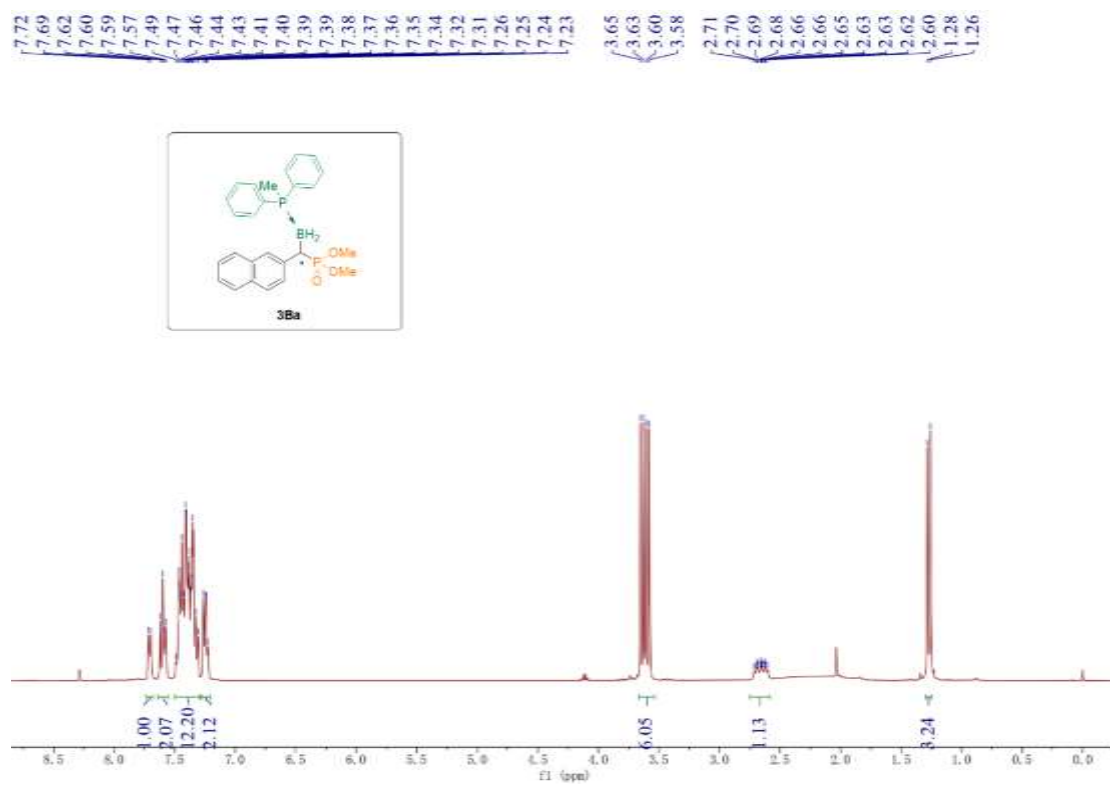

**<sup>13</sup>C NMR (101 MHz, Chloroform-*d*)**

139.11  
139.05  
139.02  
138.97  
133.33  
133.30  
131.86  
131.77  
131.60  
131.58  
131.55  
131.51  
131.19  
131.17  
130.91  
130.88  
129.63  
129.06  
128.85  
128.75  
128.58  
128.48  
128.38  
128.32  
128.02  
127.47  
127.40  
127.38  
127.36  
127.34  
127.28  
127.26  
127.13  
127.02  
125.37  
124.62  
77.32  
77.00  
76.68  
53.00  
52.94  
52.51  
52.44  
9.56  
9.19

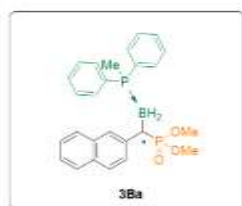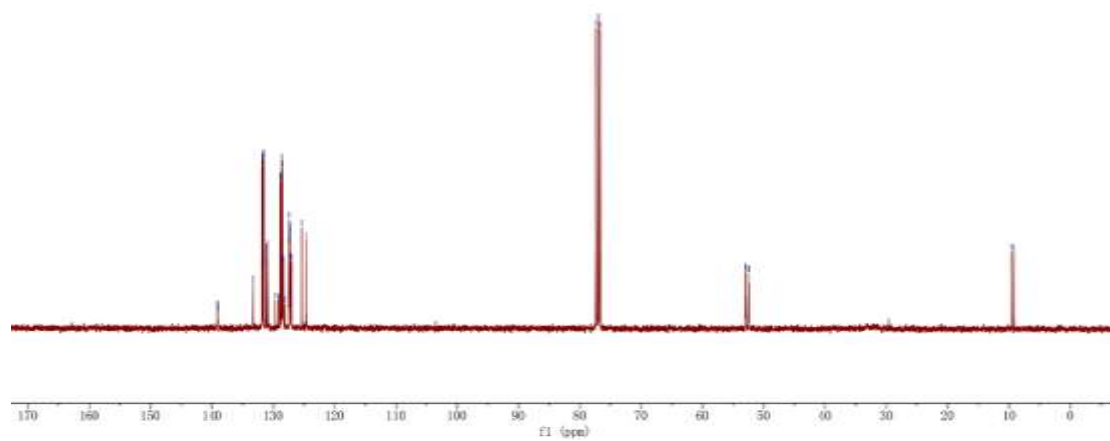

**<sup>11</sup>B NMR (128 MHz, Chloroform-*d*)**

-25.99

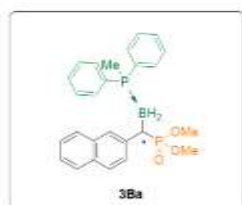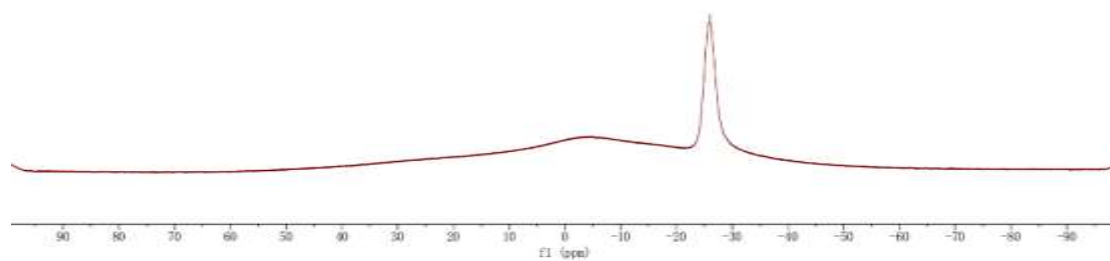

**<sup>31</sup>P NMR (162 MHz, Chloroform-*d*)**

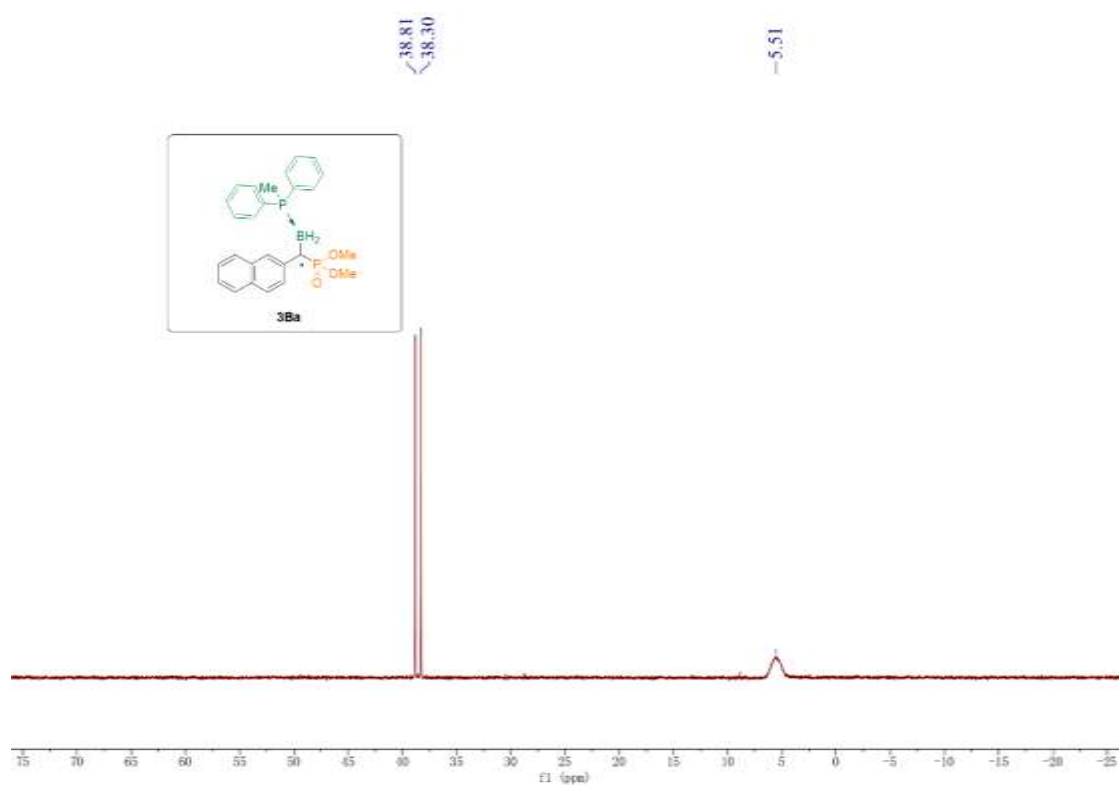

**(S)-Dimethyl((methylphenylphosphane-boryl)(naphthalen-2-yl)phosphonate(3Ca)**

**<sup>1</sup>H NMR (400 MHz, Chloroform-*d*)**

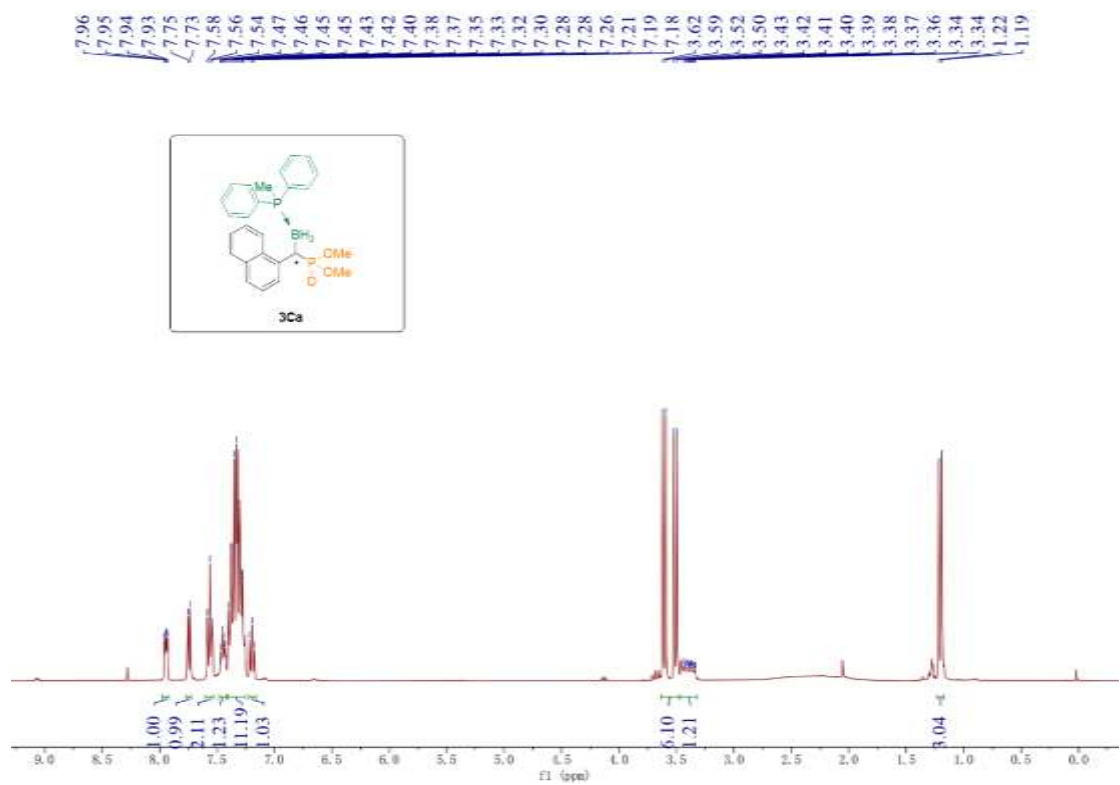

**$^{13}\text{C}$  NMR (101 MHz, Chloroform-*d*)**

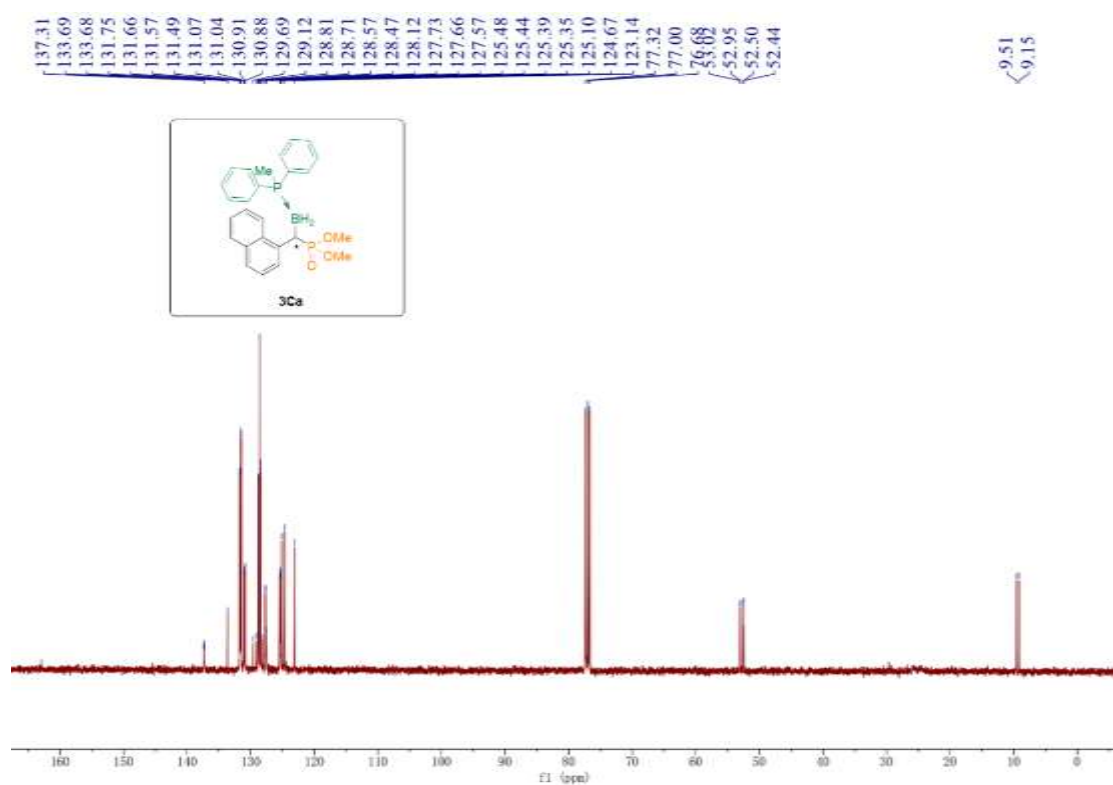

**$^{11}\text{B}$  NMR (128 MHz, Chloroform-*d*)**

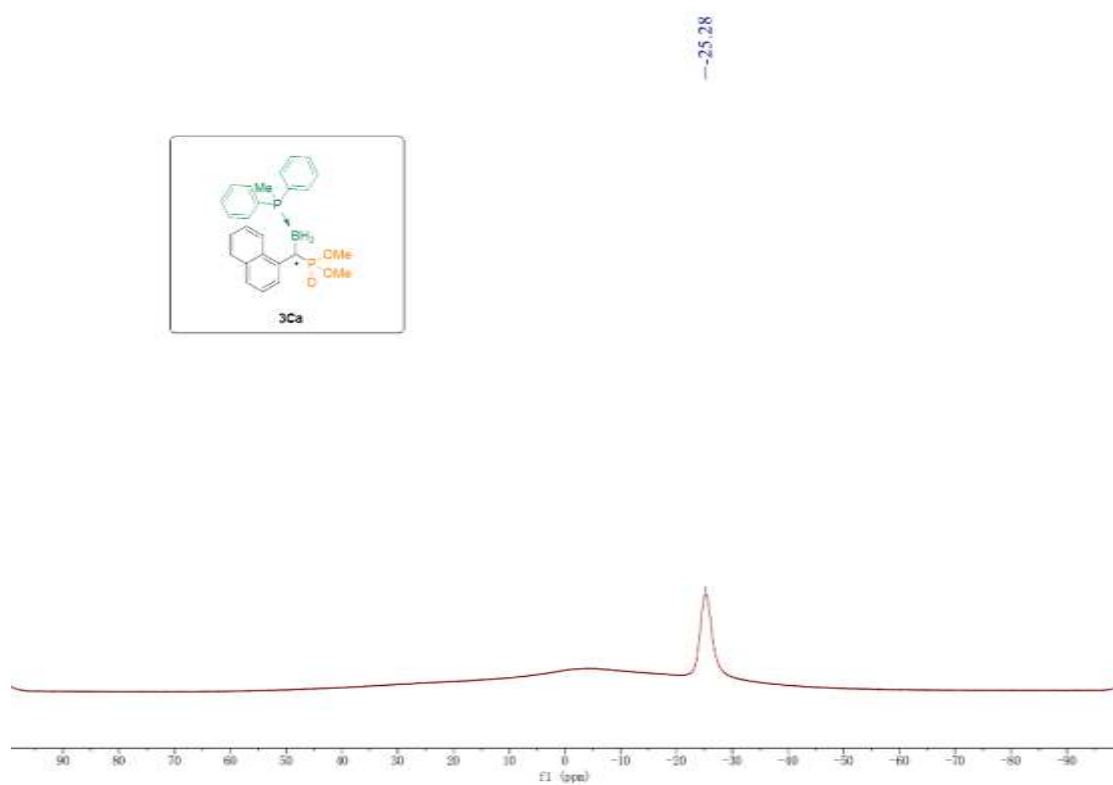

**<sup>31</sup>P NMR (162 MHz, Chloroform-*d*)**

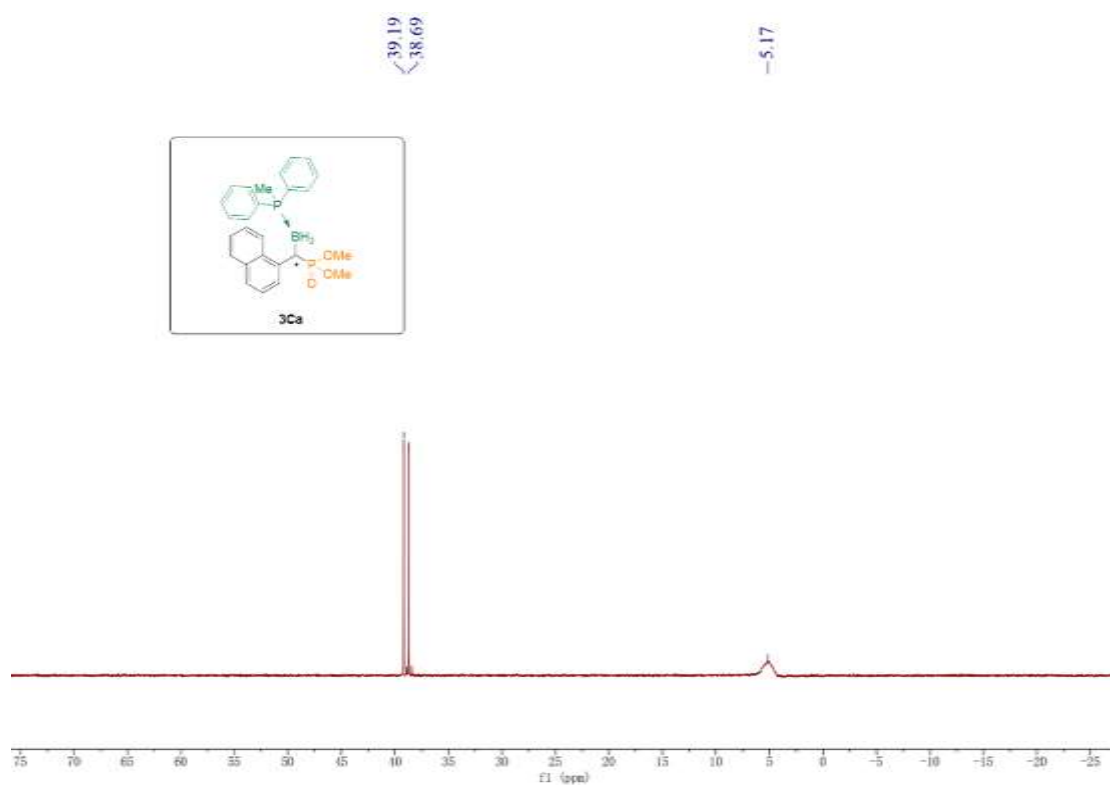

**(S)-dimethyl(((ethyldiphenylphosphane)boryl)(phenyl)methyl)phosphonate(3ab)**

**<sup>1</sup>H NMR (400 MHz, Chloroform-*d*)**

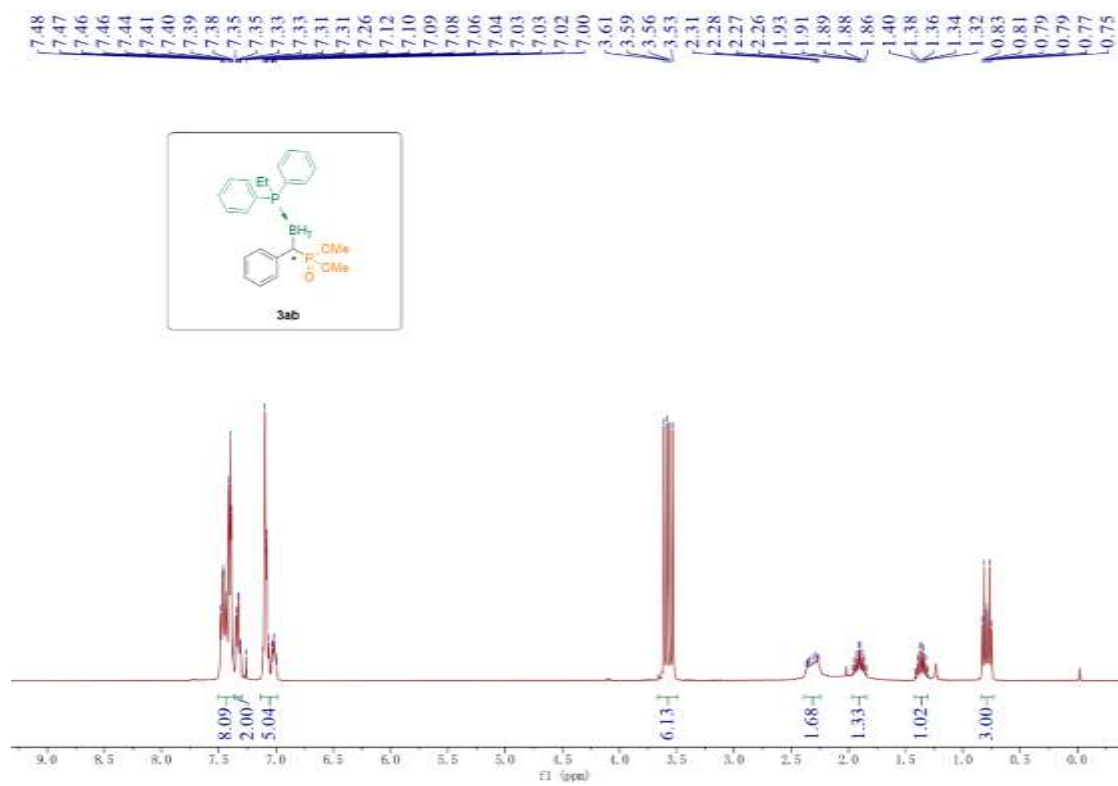

**<sup>13</sup>C NMR (101 MHz, Chloroform-*d*)**

141.51  
141.46  
141.42  
141.37  
132.60  
132.52  
132.26  
132.18  
131.06  
131.04  
129.36  
129.28  
128.77  
128.67  
128.58  
128.49  
128.08  
127.80  
127.77  
127.53  
126.99  
124.99  
124.95  
77.32  
77.00  
76.68  
52.84  
52.77  
52.41  
52.34

16.22  
15.88  
-6.57

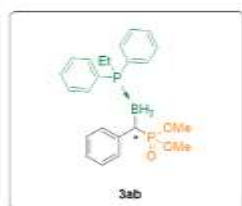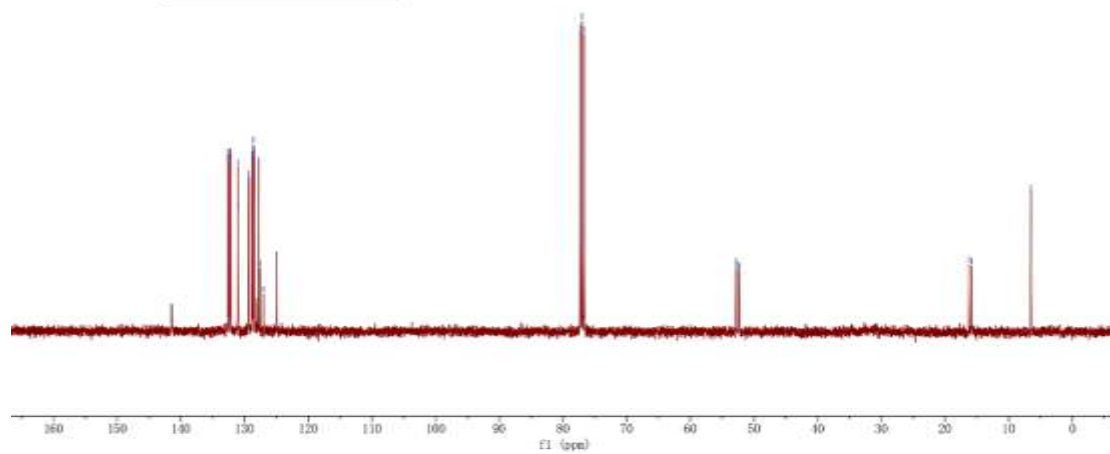

**<sup>11</sup>B NMR (128 MHz, Chloroform-*d*)**

-27.98

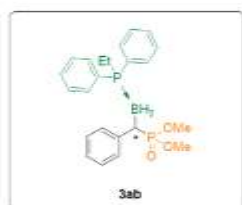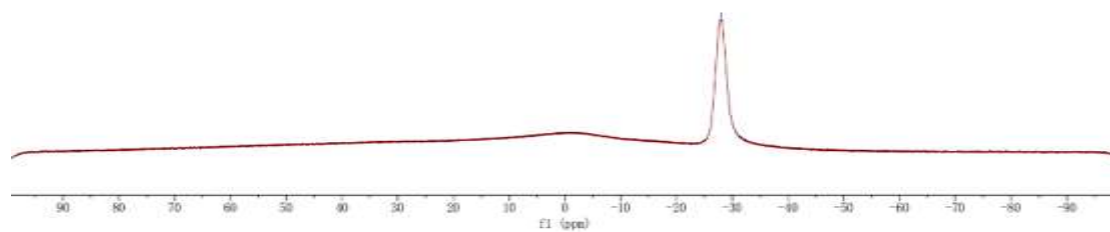

**<sup>31</sup>P NMR (162 MHz, Chloroform-*d*)**

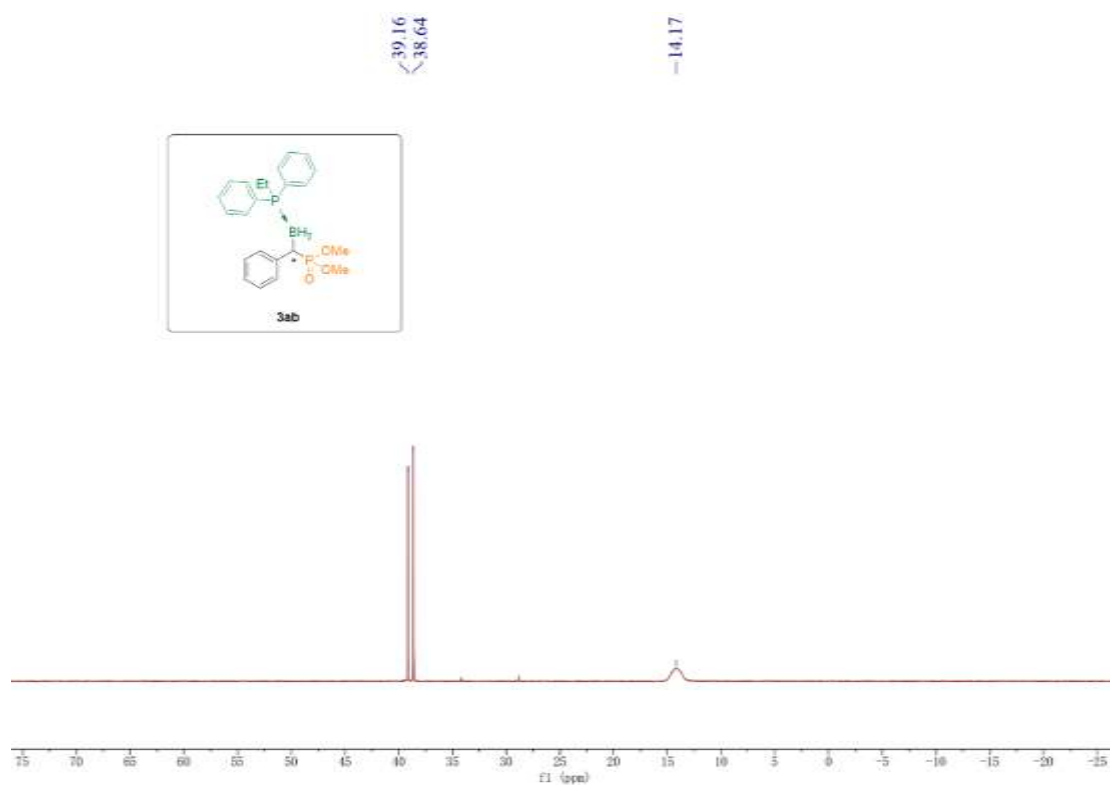

**(S)-dimethyl(((isopropylidene)diphenylphosphane)boryl)(phenyl)methylphosphonate(3ac)**

**<sup>1</sup>H NMR (400 MHz, Chloroform-*d*)**

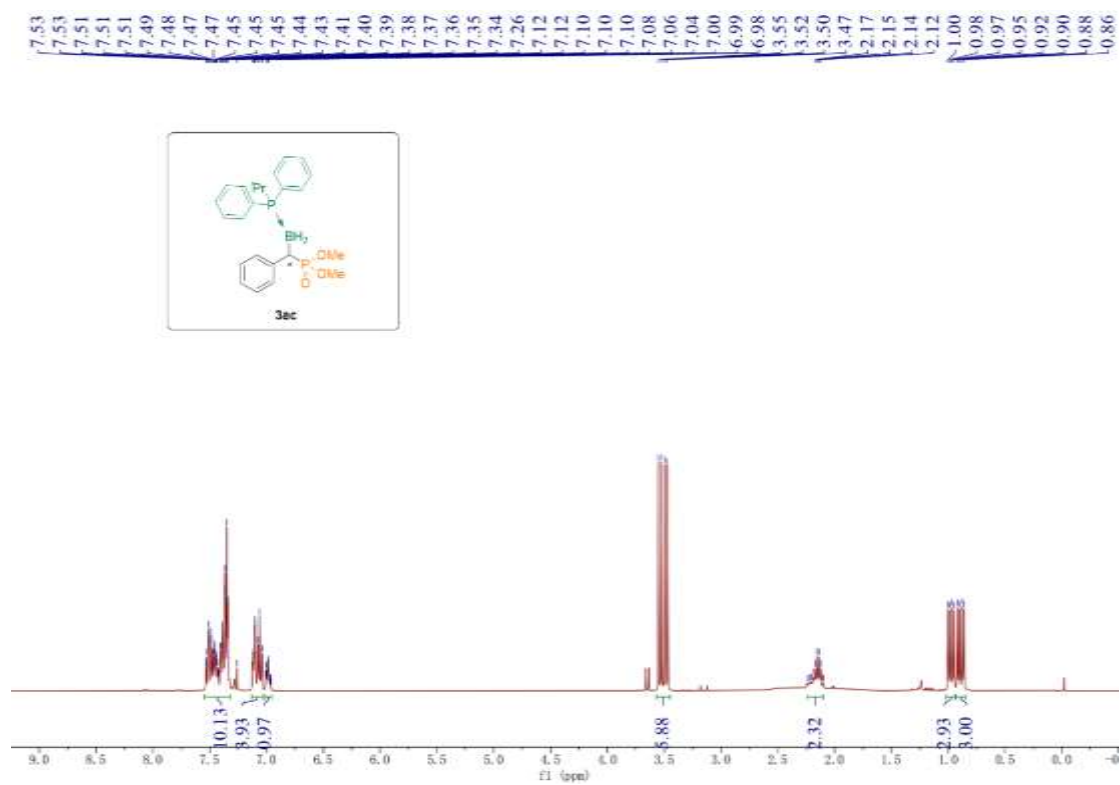

**<sup>13</sup>C NMR (101 MHz, Chloroform-*d*)**

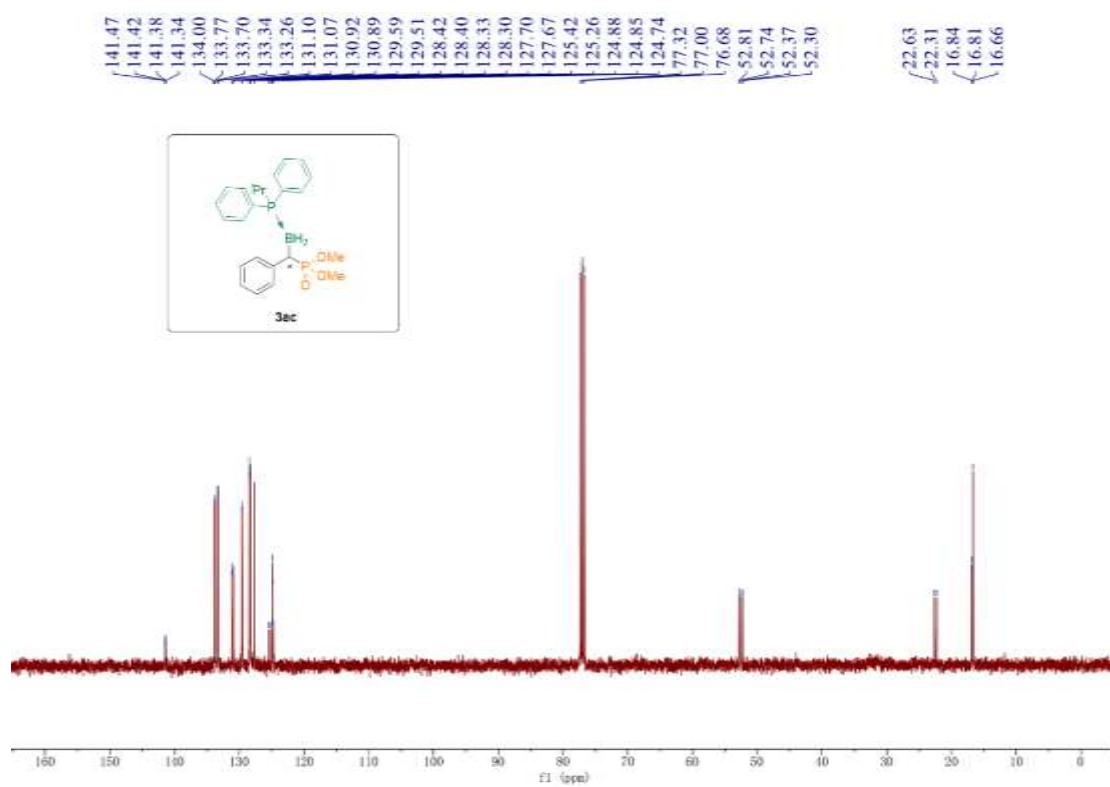

**<sup>11</sup>B NMR (128 MHz, Chloroform-*d*)**

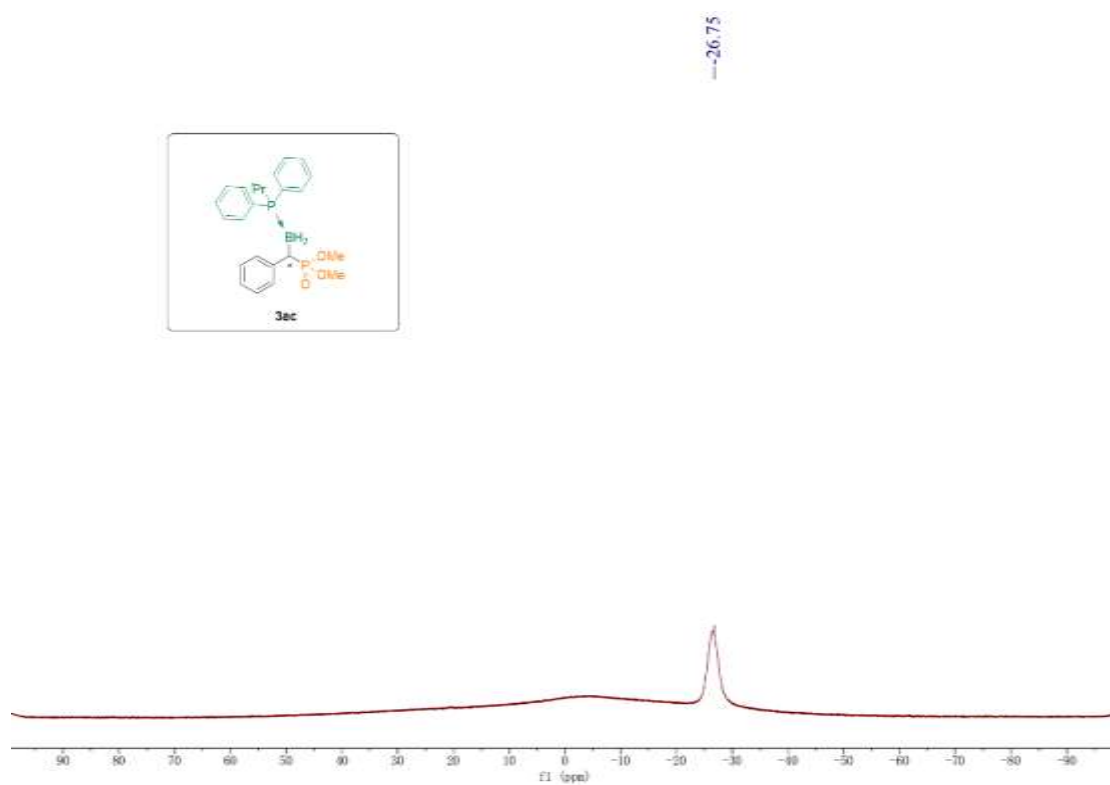



**<sup>31</sup>P NMR (162 MHz, Chloroform-*d*)**

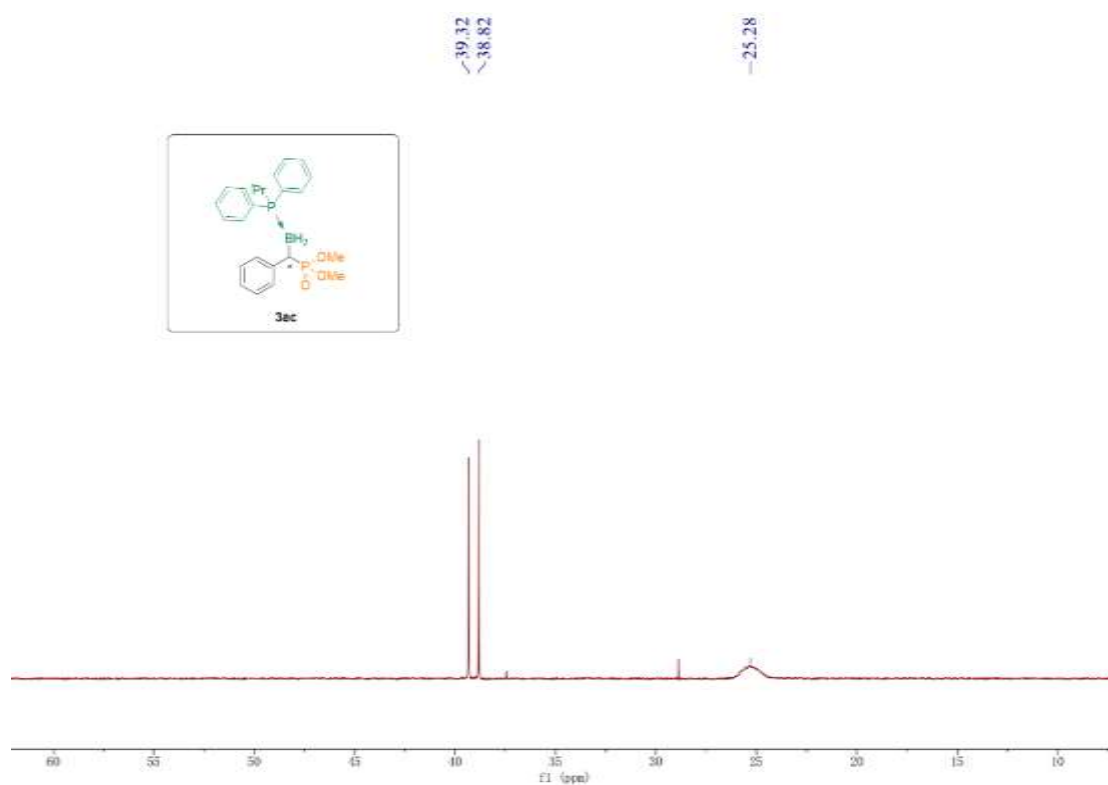

**(S)-dimethyl(((dimethyl(phenyl)phosphane)boryl)(phenyl)methyl)phosphonate(3ad)**

**<sup>1</sup>H NMR (500 MHz, Chloroform-*d*)**

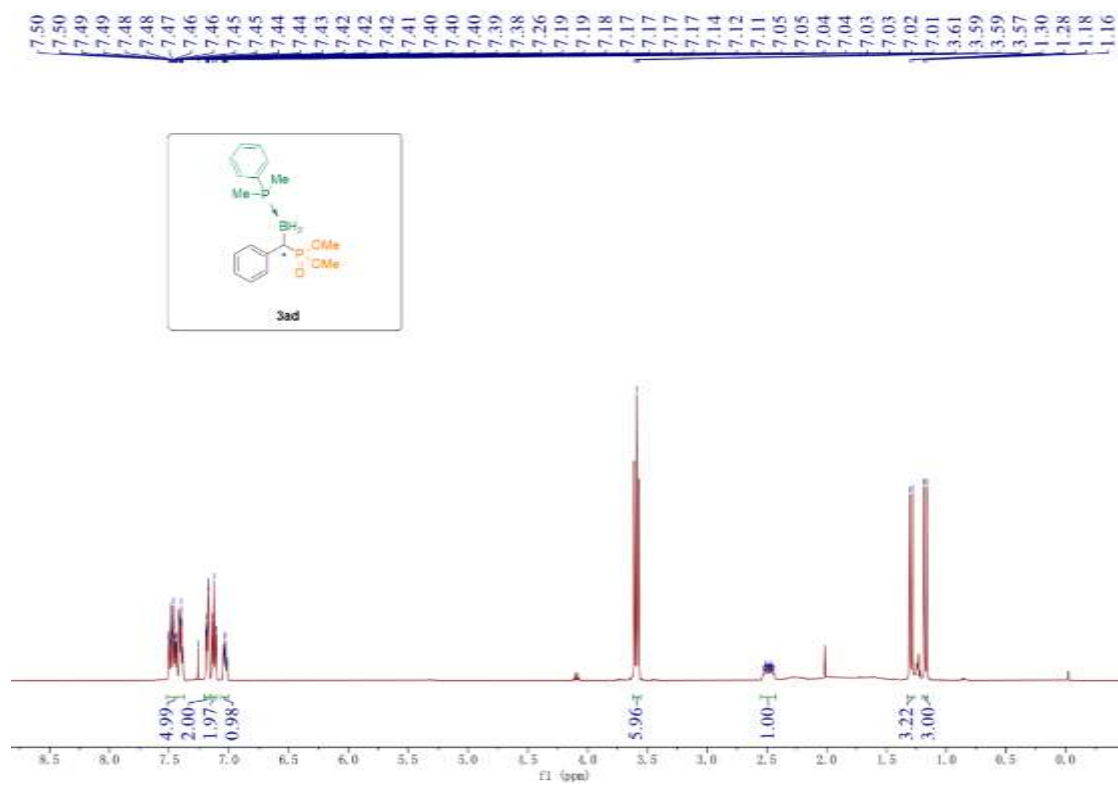

**<sup>13</sup>C NMR (126 MHz, Chloroform-*d*)**

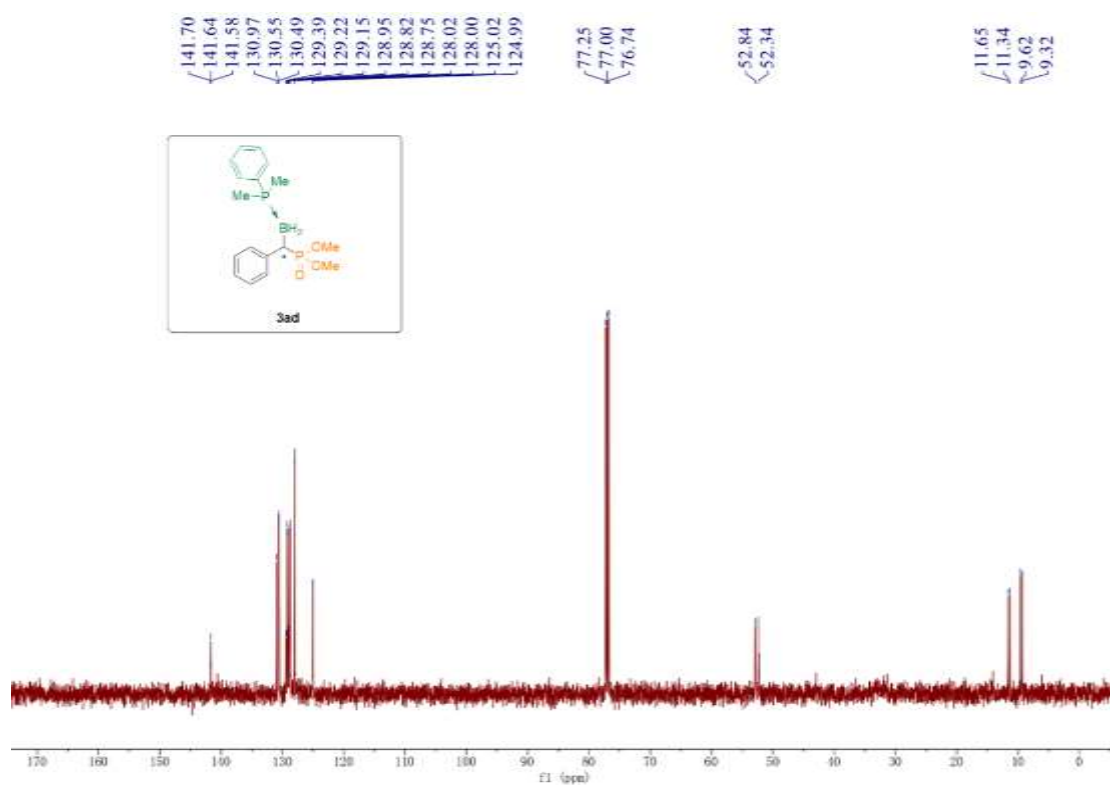

**<sup>11</sup>B NMR (202 MHz, Chloroform-*d*)**

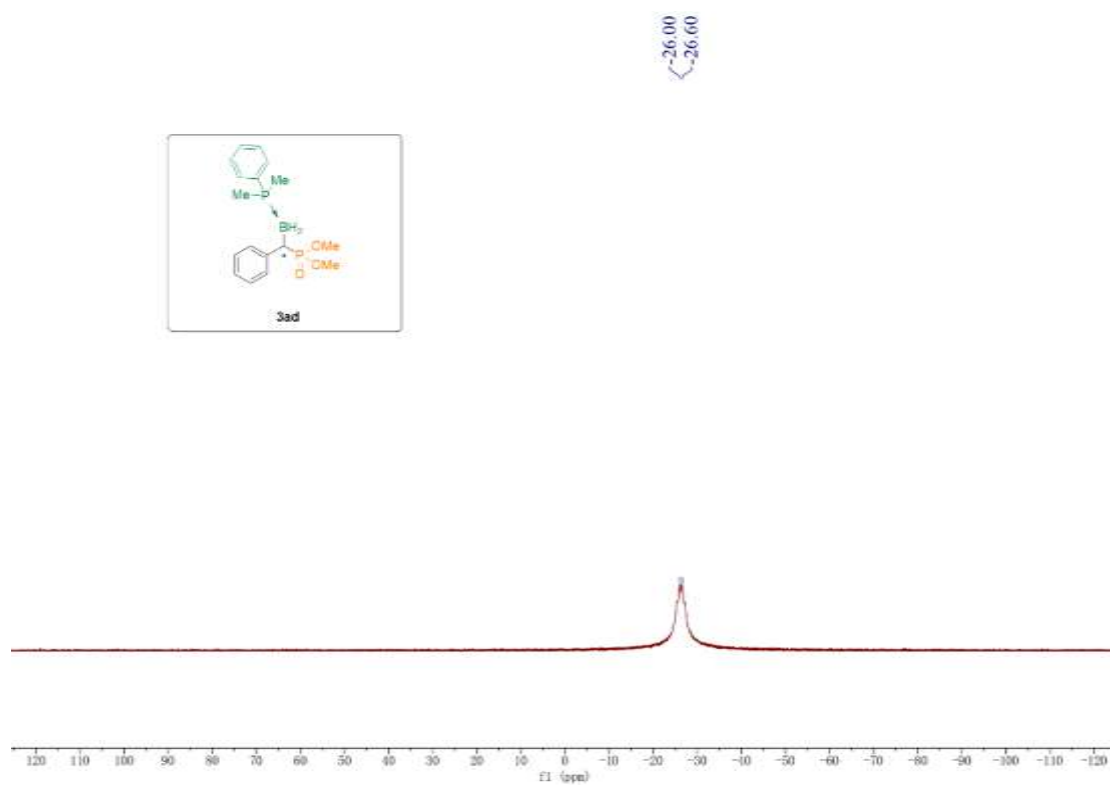

**<sup>31</sup>P NMR (160 MHz, Chloroform-*d*)**

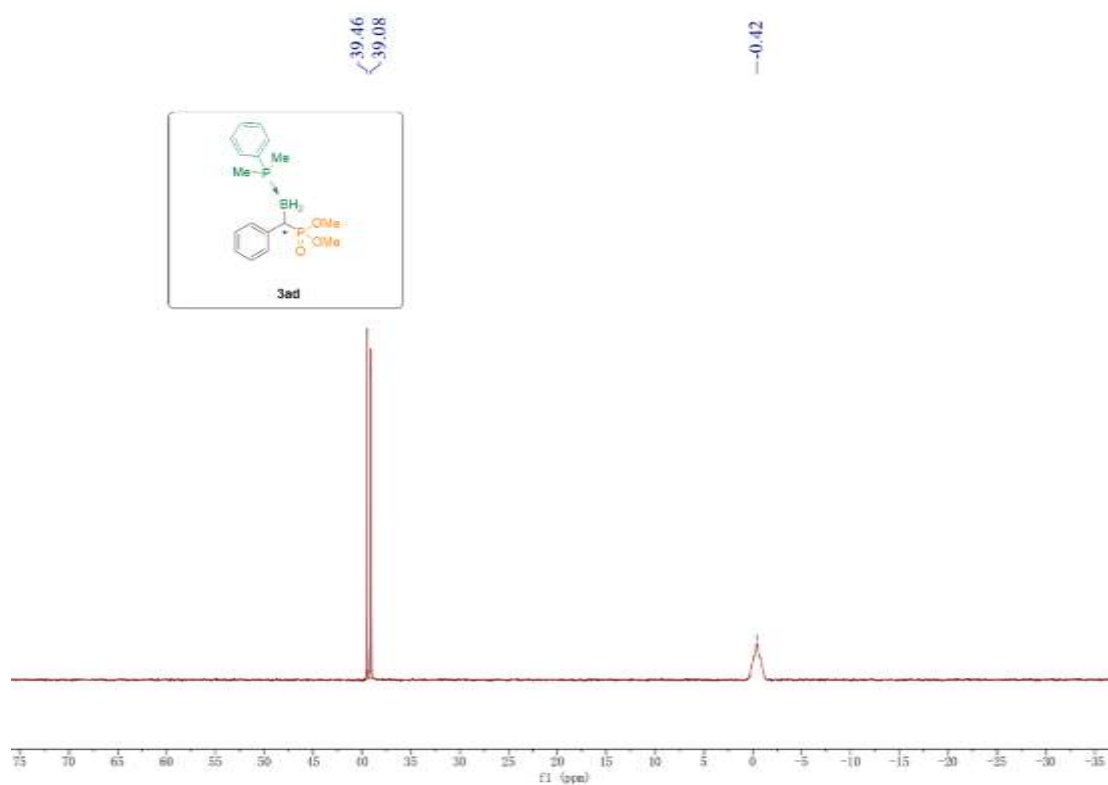

**(S)-dimethyl(((diethyl(phenyl)phosphane)boryl)(phenyl)methyl)phosphonate(3ae)**

**<sup>1</sup>H NMR (500 MHz, Chloroform-*d*)**

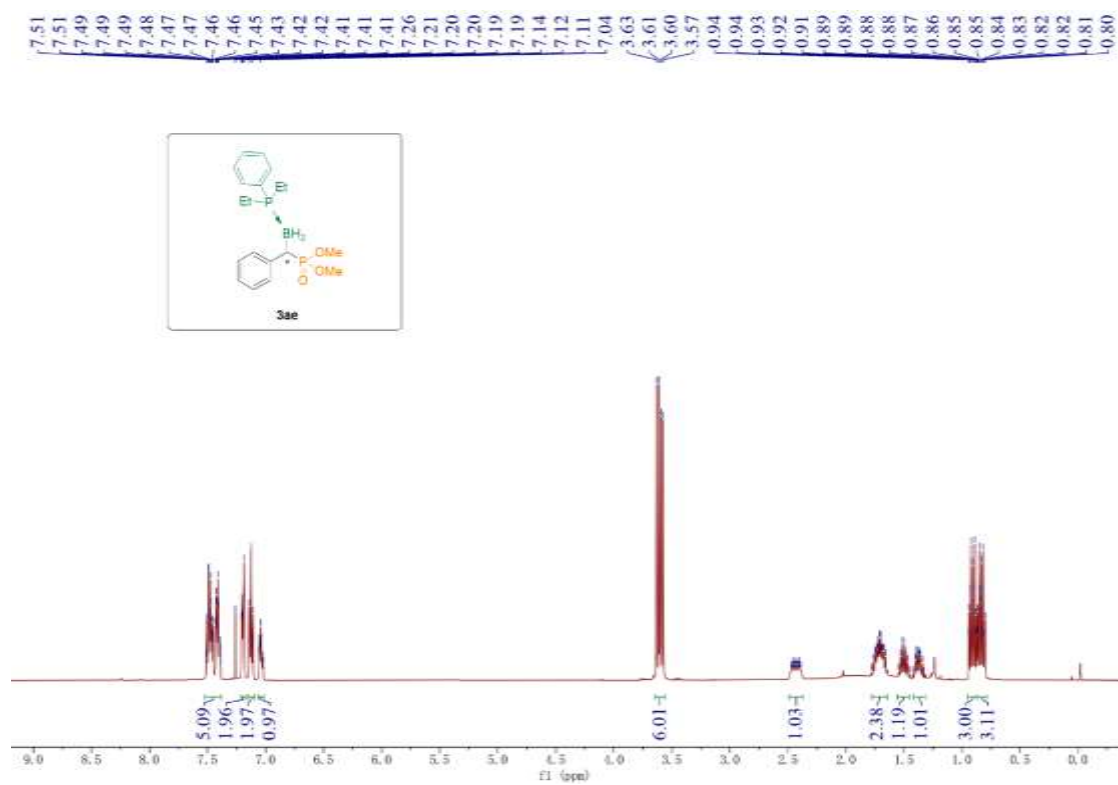

**$^{13}\text{C}$  NMR (126 MHz, Chloroform-*d*)**

141.99  
141.95  
141.92  
141.88  
131.72  
131.66  
131.02  
131.00  
129.22  
129.16  
128.77  
128.70  
127.93  
127.91  
126.25  
125.84

77.25  
77.00  
76.75

52.95  
52.89  
52.45  
52.39

15.92  
15.64  
14.16  
13.89  
6.51  
6.49  
6.40  
6.37

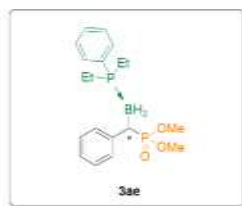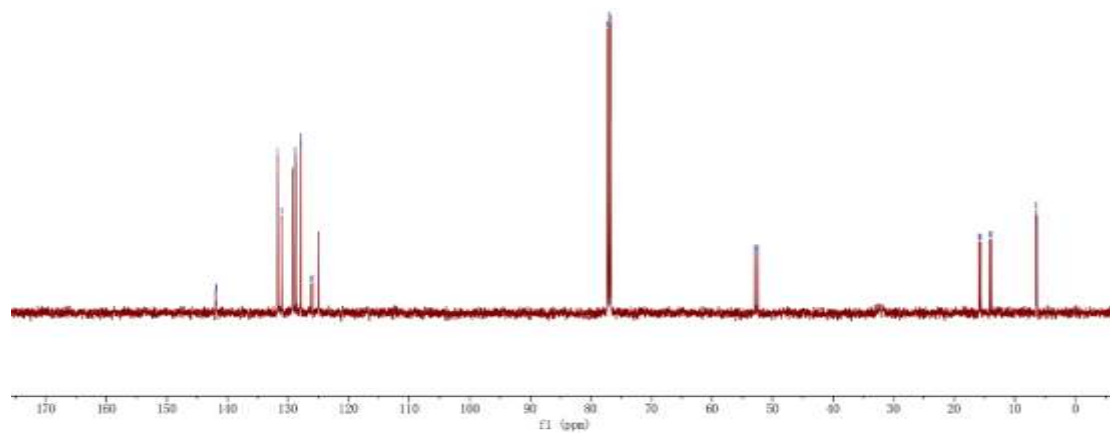

**$^{11}\text{B}$  NMR (128 MHz, Chloroform-*d*)**

-28.58

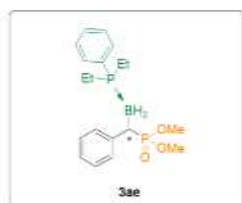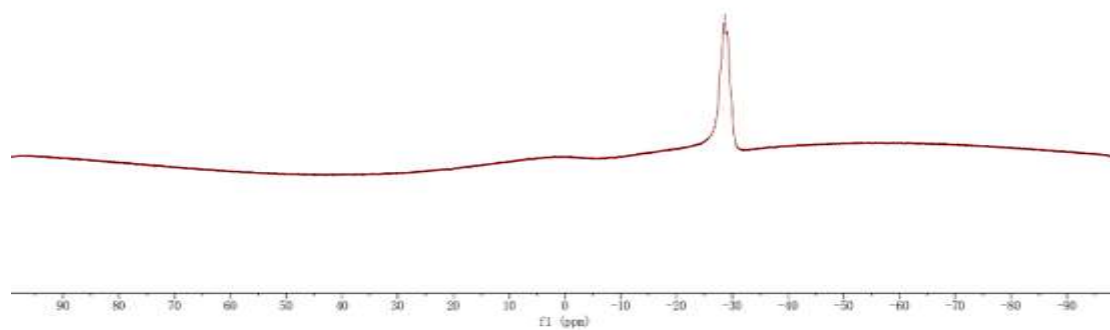

**<sup>31</sup>P NMR (202 MHz, Chloroform-*d*)**

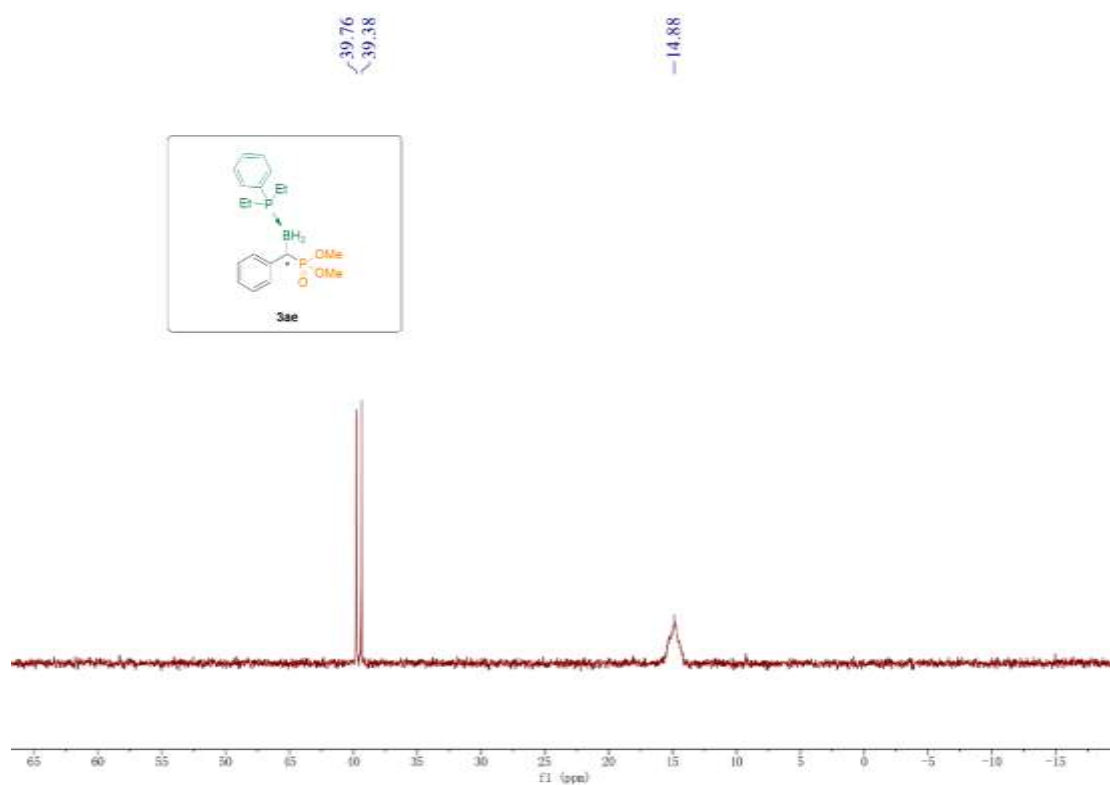

**(S)-dimethyl(((dicyclohexyl(phenyl)phosphane)boryl)(phenyl)methyl)phosphonate(3af)**

**<sup>1</sup>H NMR (400 MHz, Chloroform-*d*)**

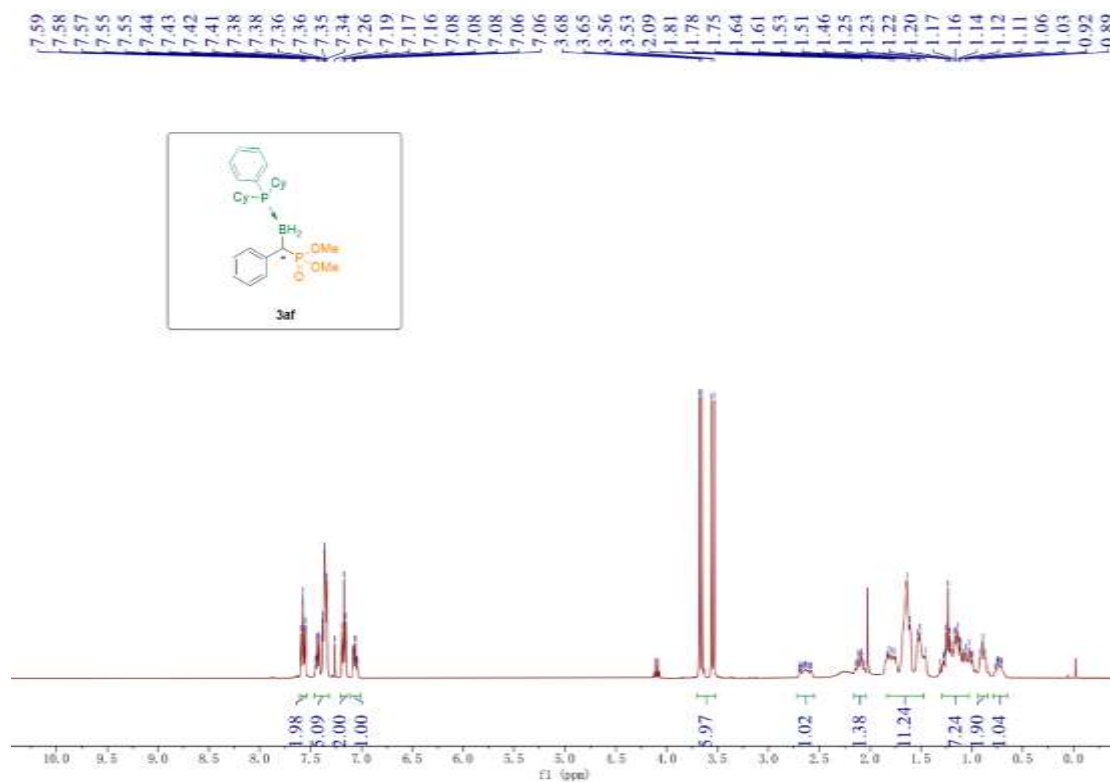

**<sup>13</sup>C NMR (101 MHz, Chloroform-*d*)**

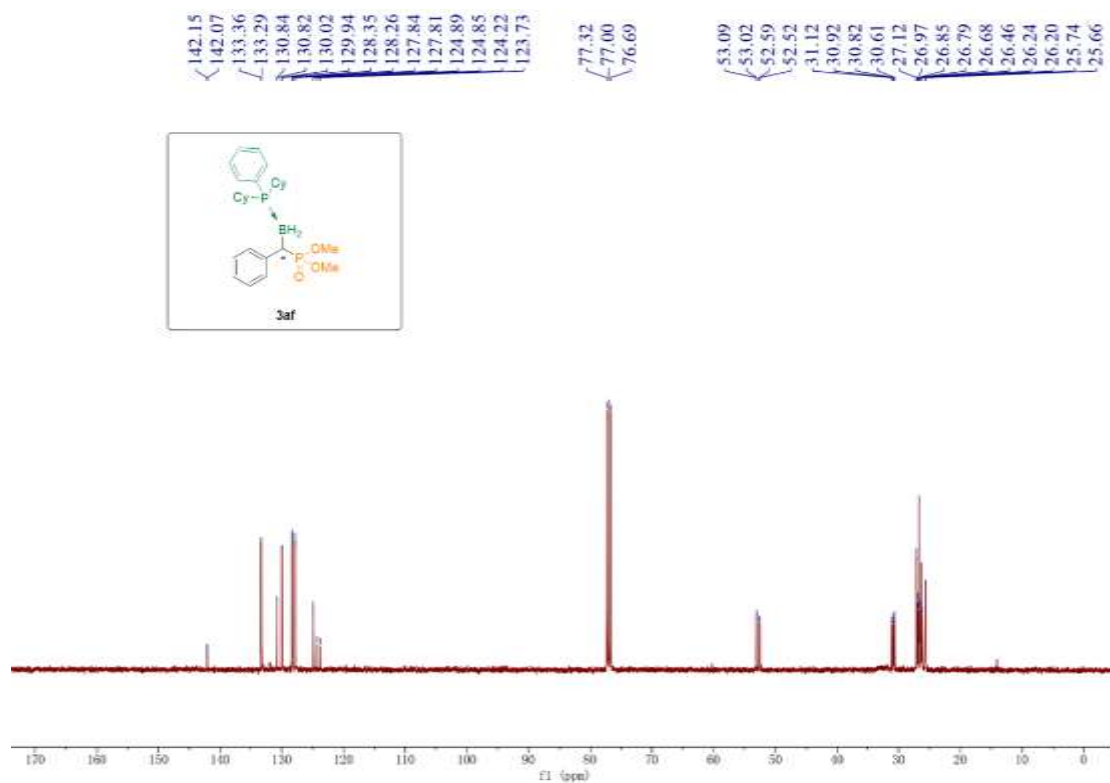

**<sup>11</sup>B NMR (128 MHz, Chloroform-*d*)**

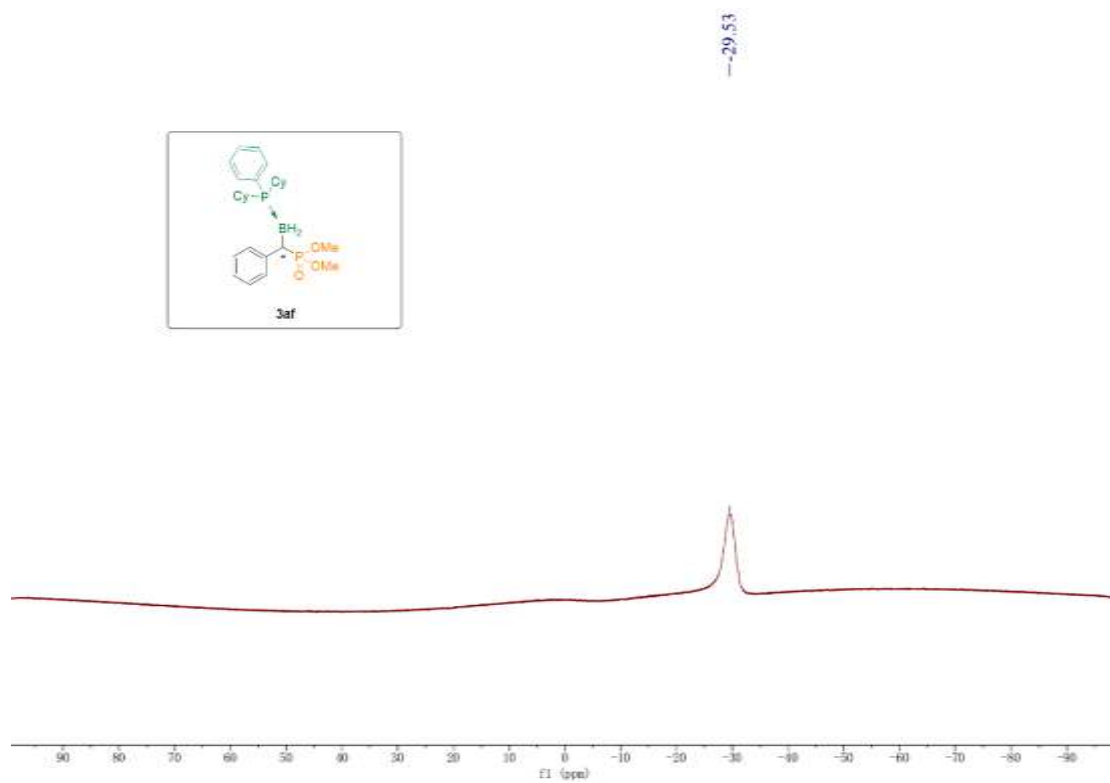

**<sup>31</sup>P NMR (162 MHz, Chloroform-*d*)**

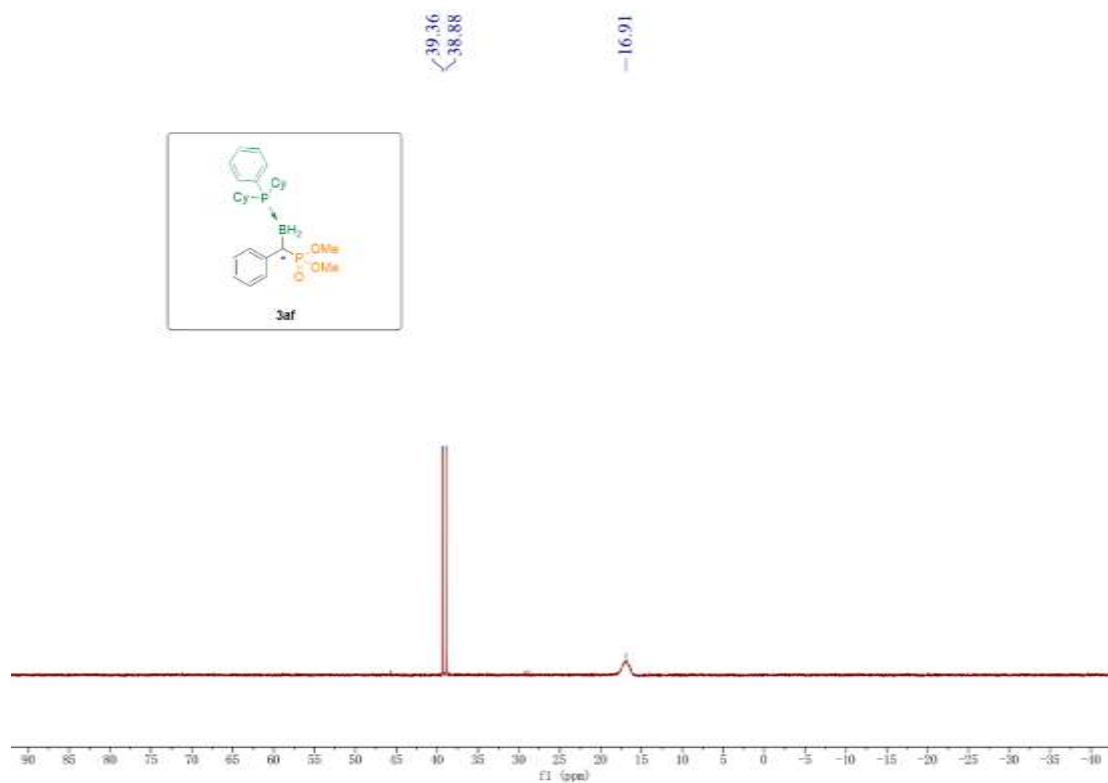

**(S)-dimethyl(((trimethylphosphane)boryl)([1,1'-biphenyl]-4-yl)methyl)phosphonate(**3lg**)**

**<sup>1</sup>H NMR (400 MHz, Chloroform-*d*)**

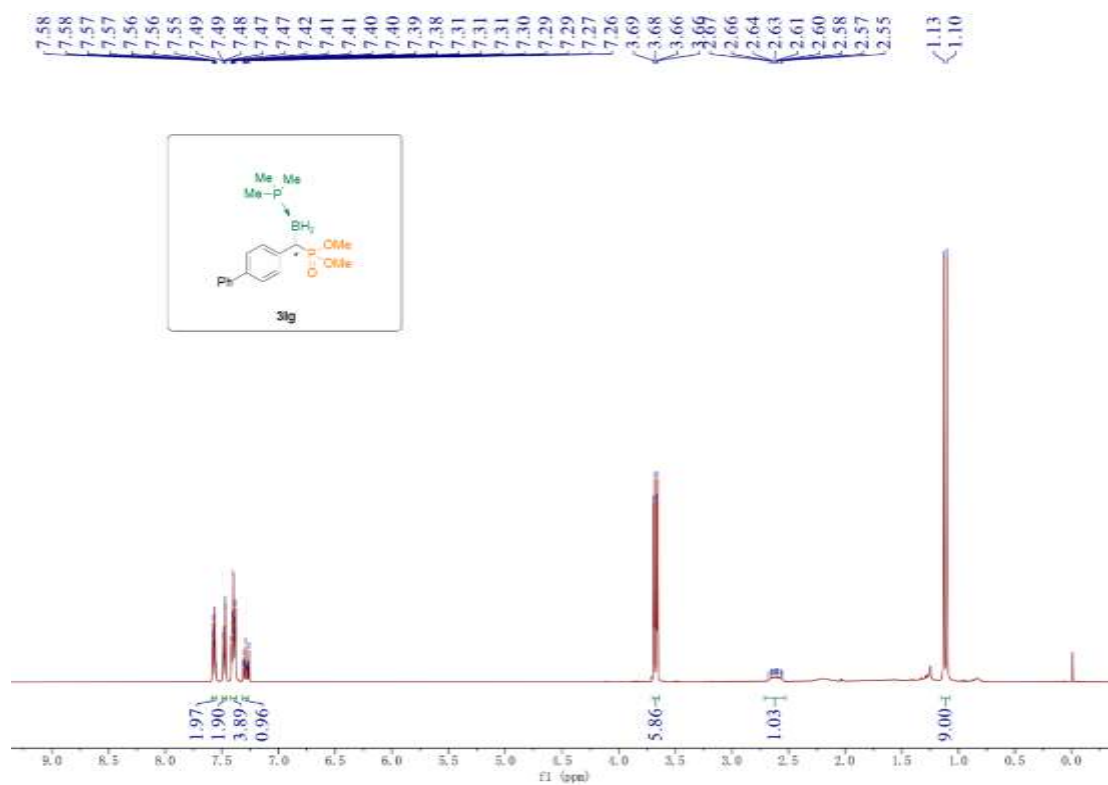

**$^{13}\text{C}$  NMR (101 MHz, Chloroform-*d*)**

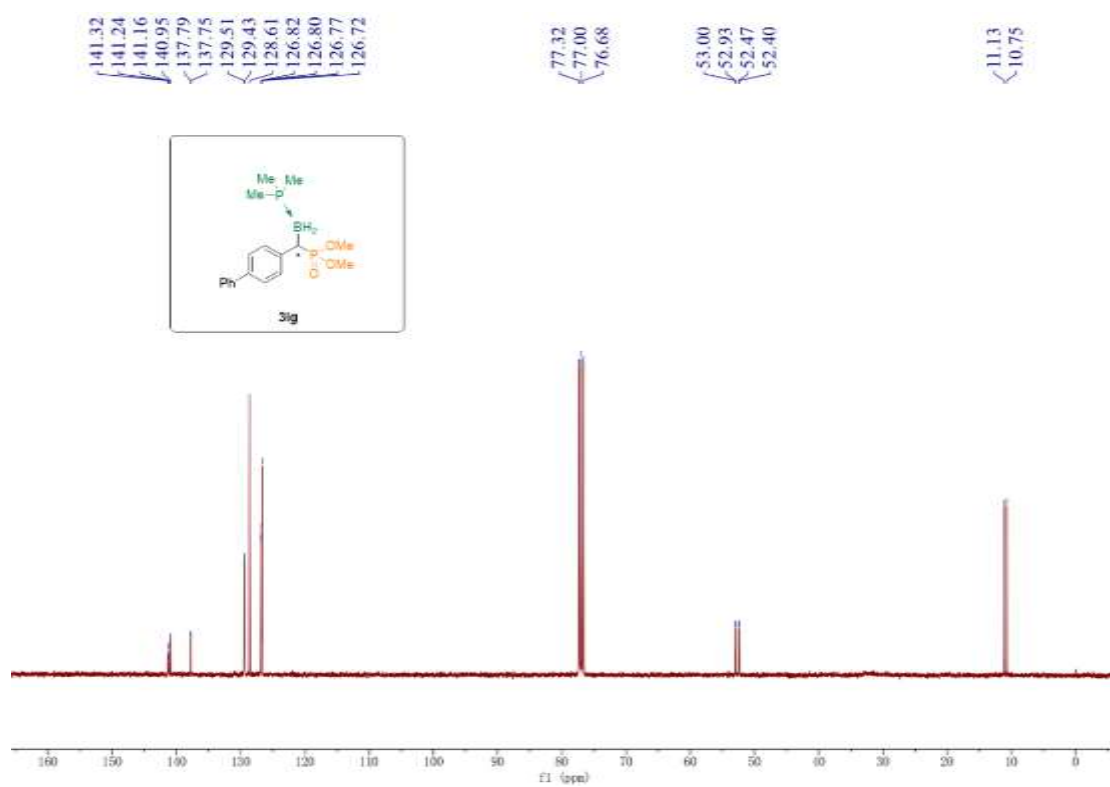

**$^{11}\text{B}$  NMR (128 MHz, Chloroform-*d*)**

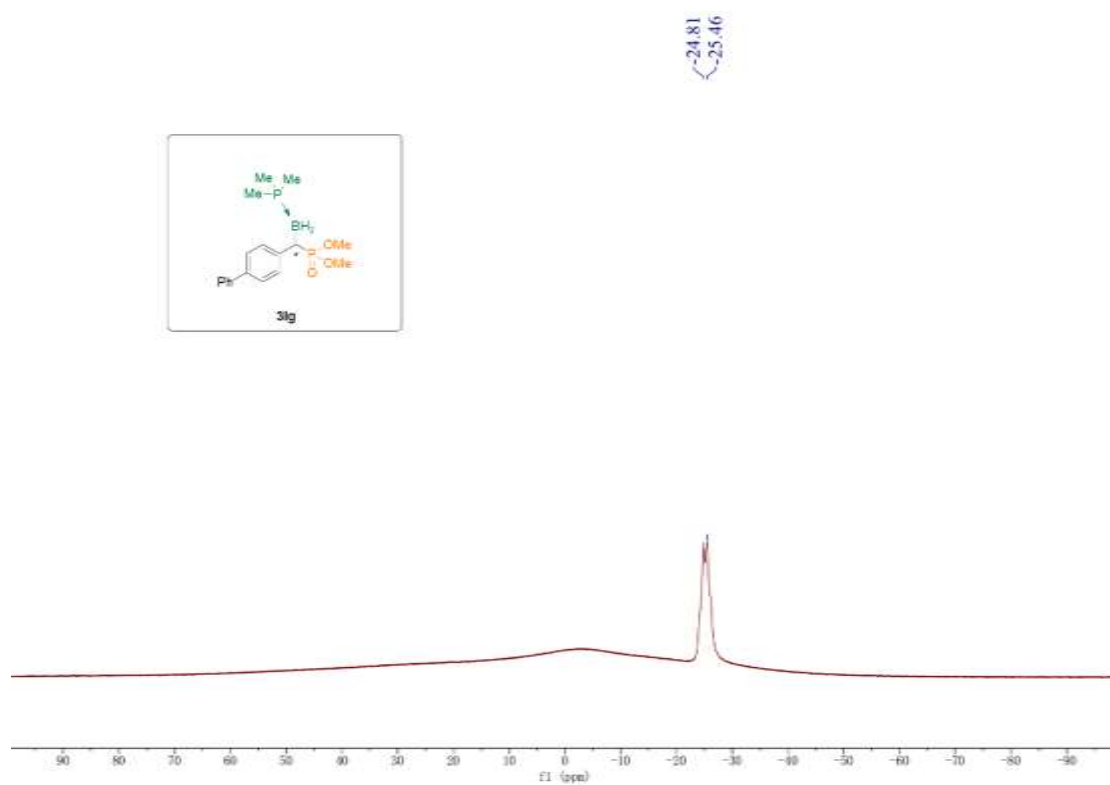



**<sup>31</sup>P NMR (162 MHz, Chloroform-*d*)**

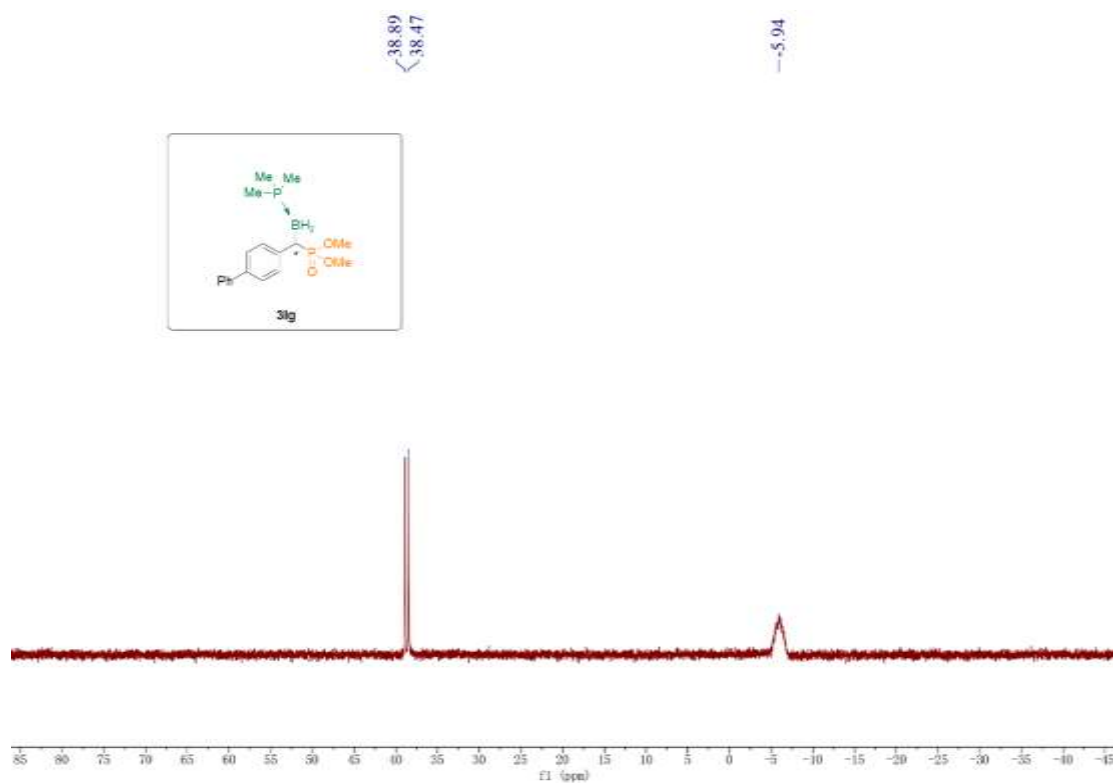

**(S)-dimethyl(((tributylphosphane)boryl)([1,1'-biphenyl]-4-yl)methyl)phosphonate(3lh)**

**<sup>1</sup>H NMR (500 MHz, Chloroform-*d*)**

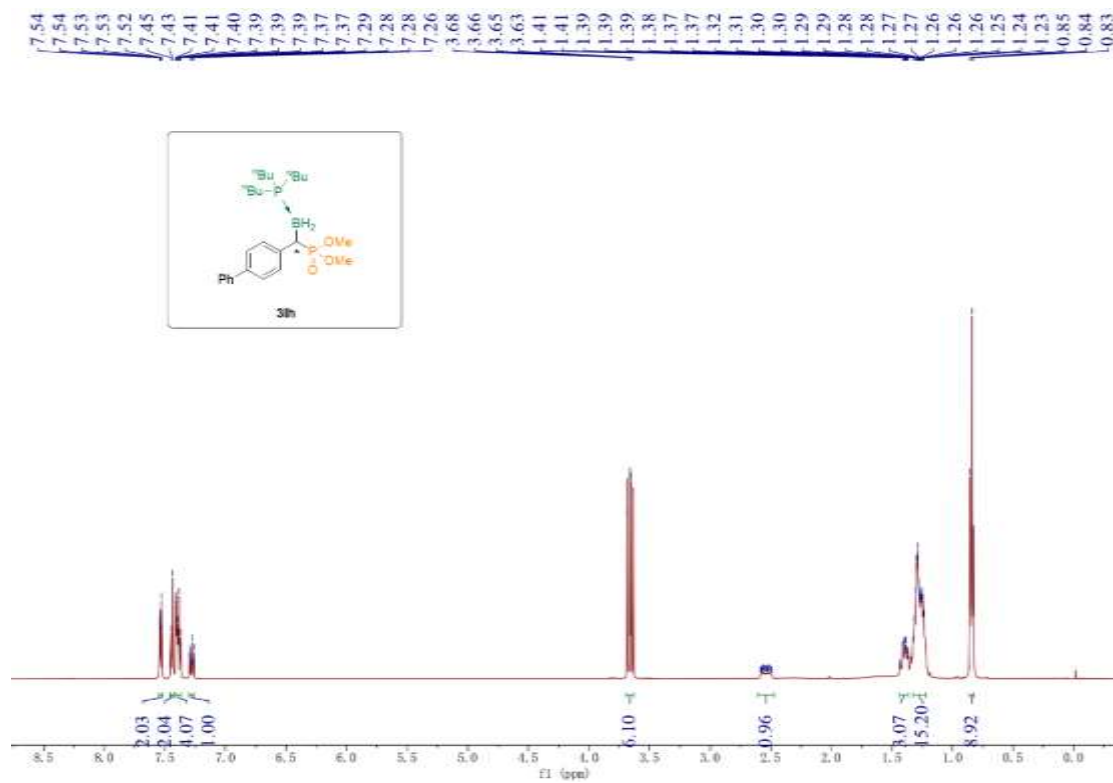

**$^{13}\text{C}$  NMR (126 MHz, Chloroform-*d*)**

141.67  
141.63  
141.60  
141.56  
141.11  
137.78  
137.76  
129.55  
129.49  
128.53  
126.69

77.26  
77.00  
76.75

52.92  
52.86  
52.50  
52.45

24.28  
24.25  
24.23  
24.18  
20.77  
13.42

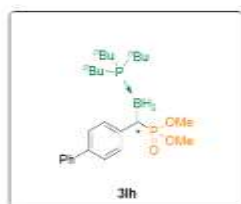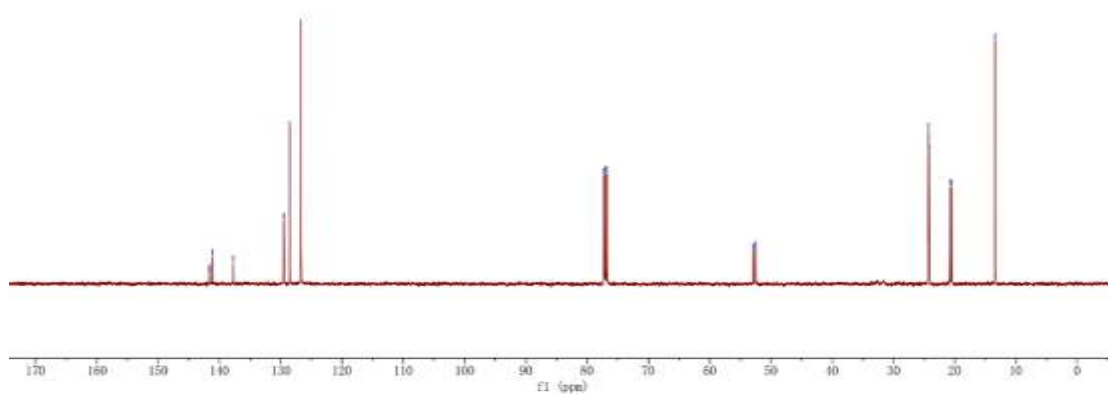

**$^{11}\text{B}$  NMR (128 MHz, Chloroform-*d*)**

-28.05

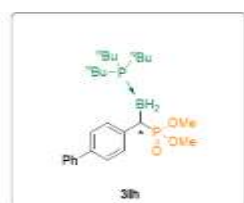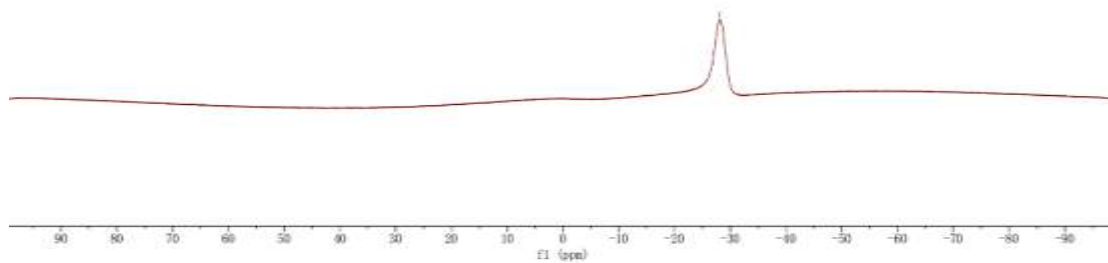

**<sup>31</sup>P NMR (202 MHz, Chloroform-*d*)**

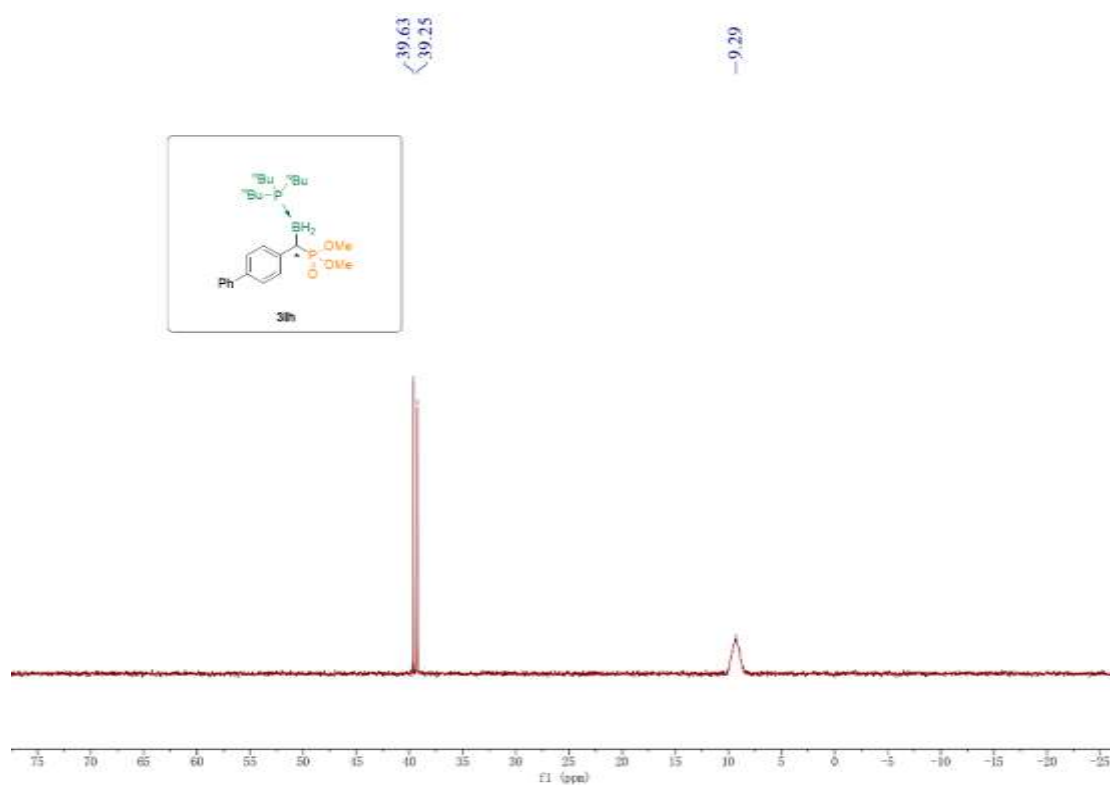

**(S)-dimethyl(((trimethylphosphite)boryl)([1,1'-biphenyl]-4-yl)methyl)phosphonate(**3li**)**

**<sup>1</sup>H NMR (500 MHz, Chloroform-*d*)**

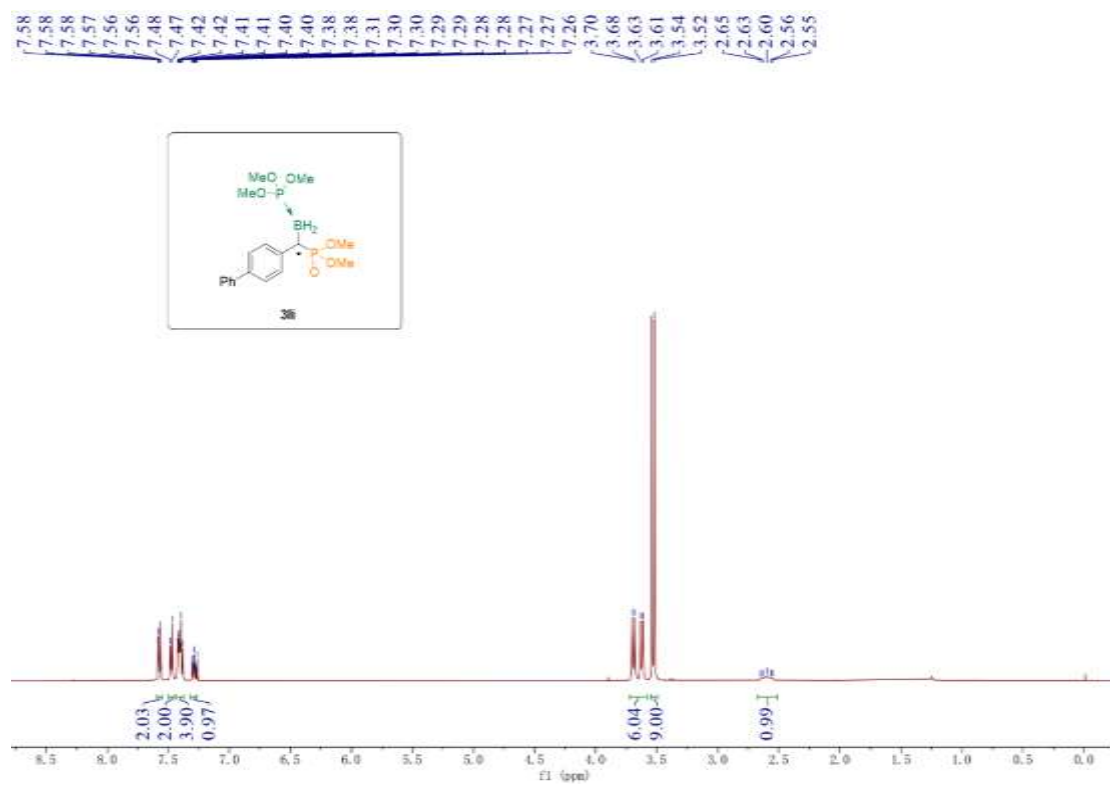

**$^{13}\text{C}$  NMR (101 MHz, Chloroform-*d*)**

141.25  
141.19  
141.17  
141.11  
141.03  
137.55  
137.52  
129.54  
129.46  
128.57  
126.74  
126.67  
126.53  
126.50

77.32  
77.00  
76.68

53.10  
53.05  
53.03  
52.96  
52.47  
52.40

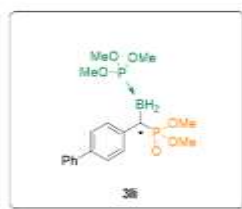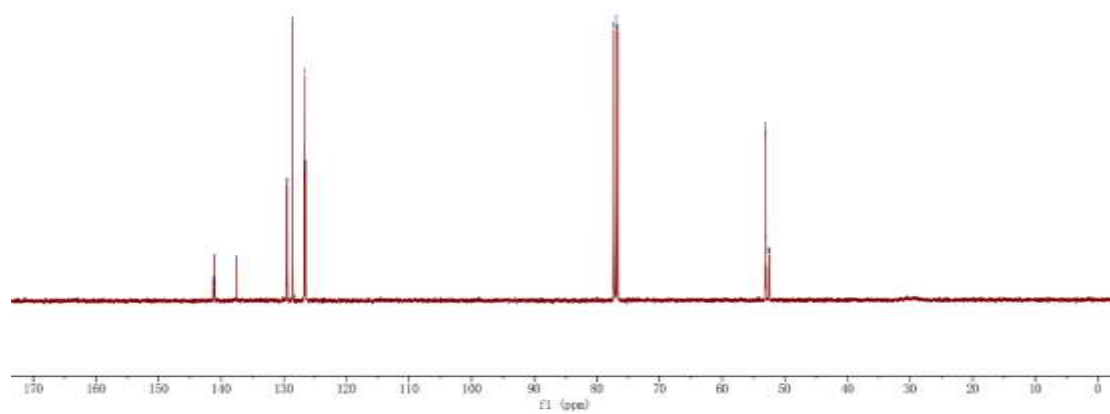

**$^{11}\text{B}$  NMR (160 MHz, Chloroform-*d*)**

32.19  
32.84

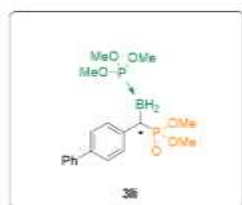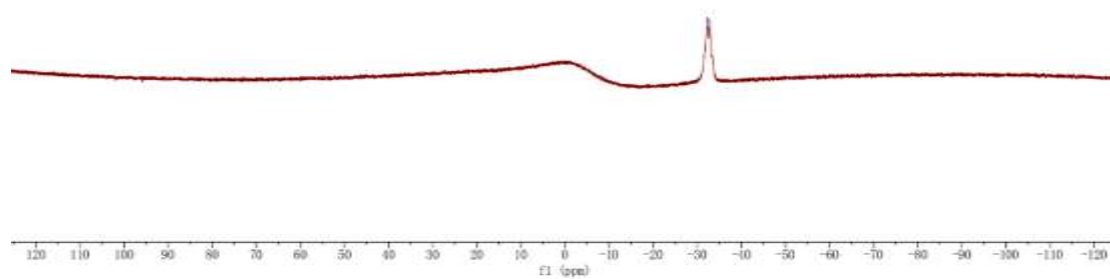

**<sup>31</sup>P NMR (202 MHz, Chloroform-*d*)**

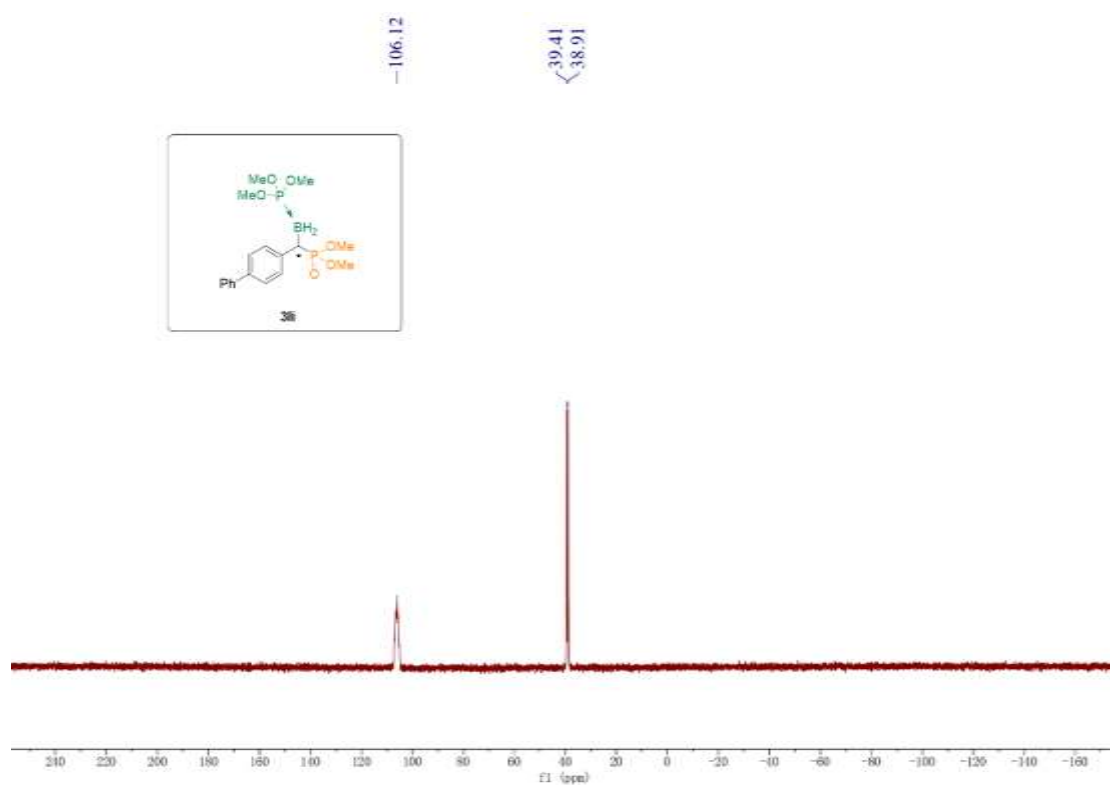

**(S)-diethyl(((methylphenylphosphane)boryl)(phenyl)methyl)phosphonate(5aa)**

**<sup>1</sup>H NMR (500 MHz, Chloroform-*d*)**

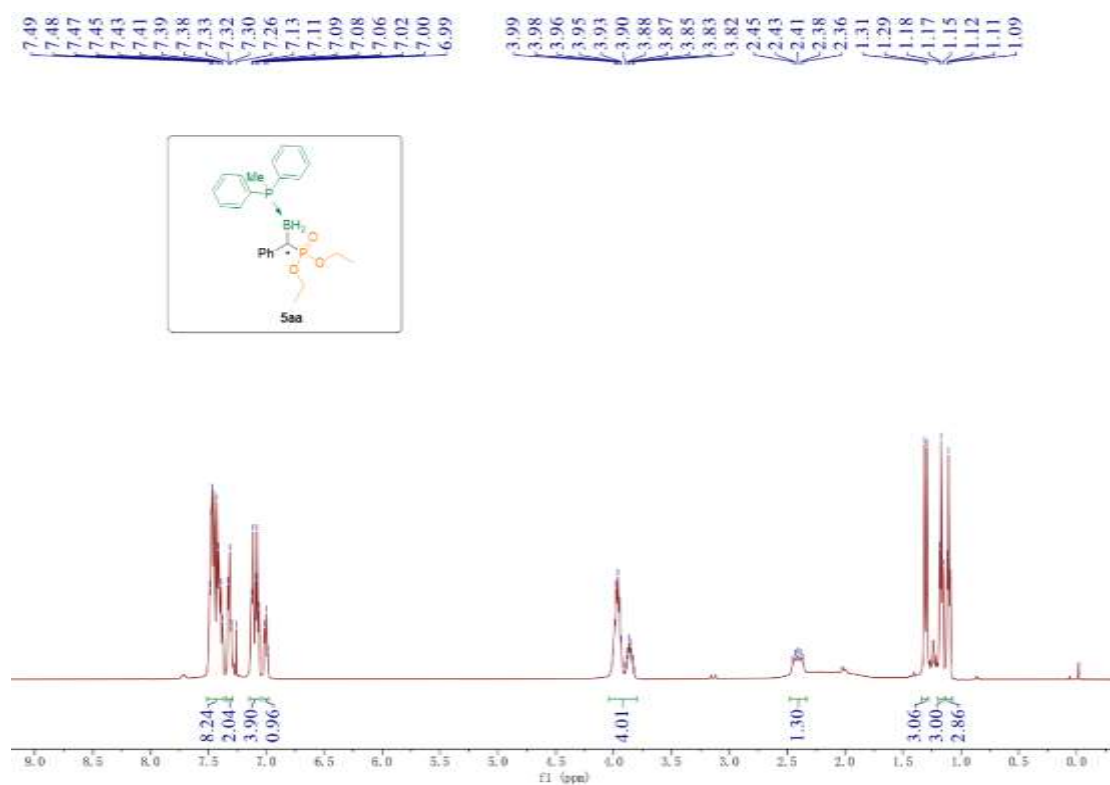

**$^{13}\text{C}$  NMR (101 MHz, Chloroform-*d*)**

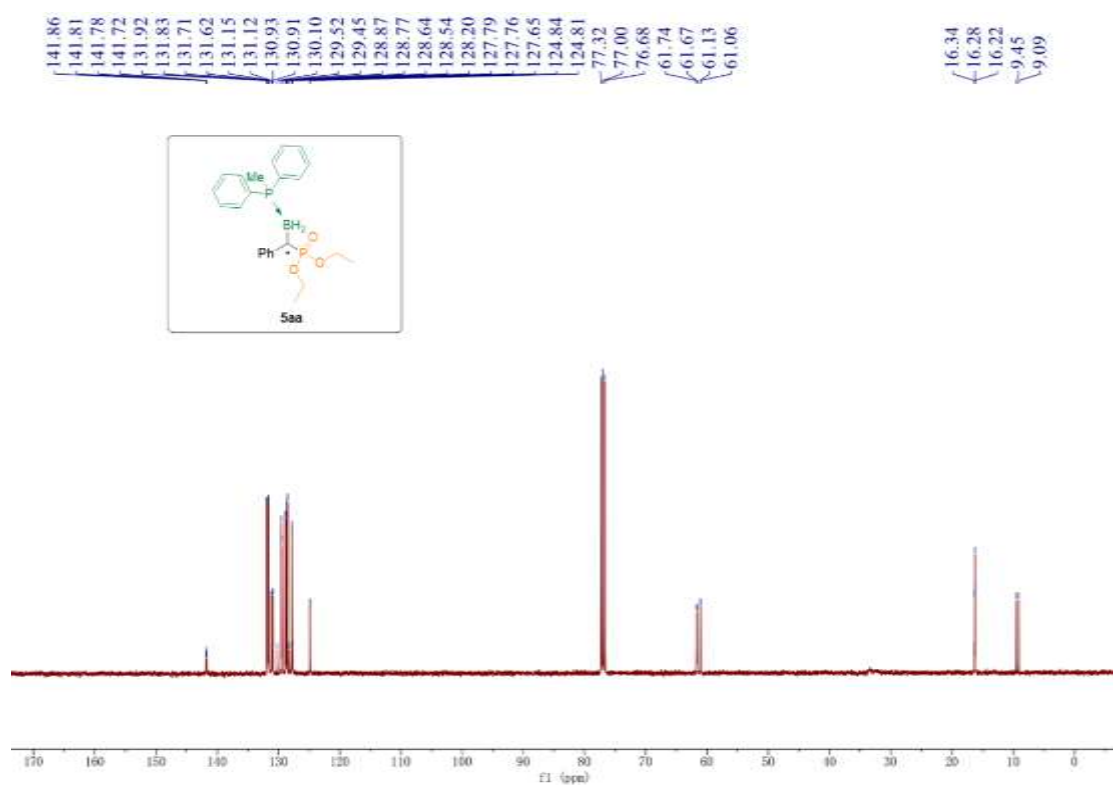

**$^{11}\text{B}$  NMR (160 MHz, Chloroform-*d*)**

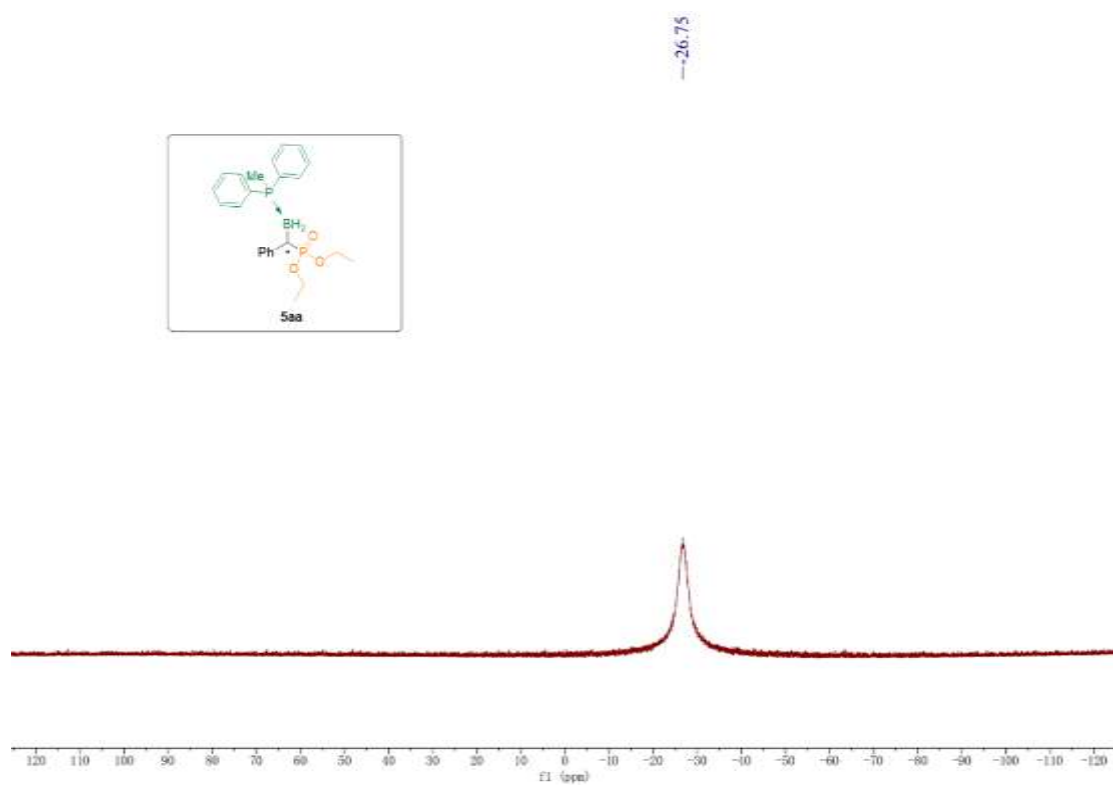

**<sup>31</sup>P NMR (202 MHz, Chloroform-*d*)**

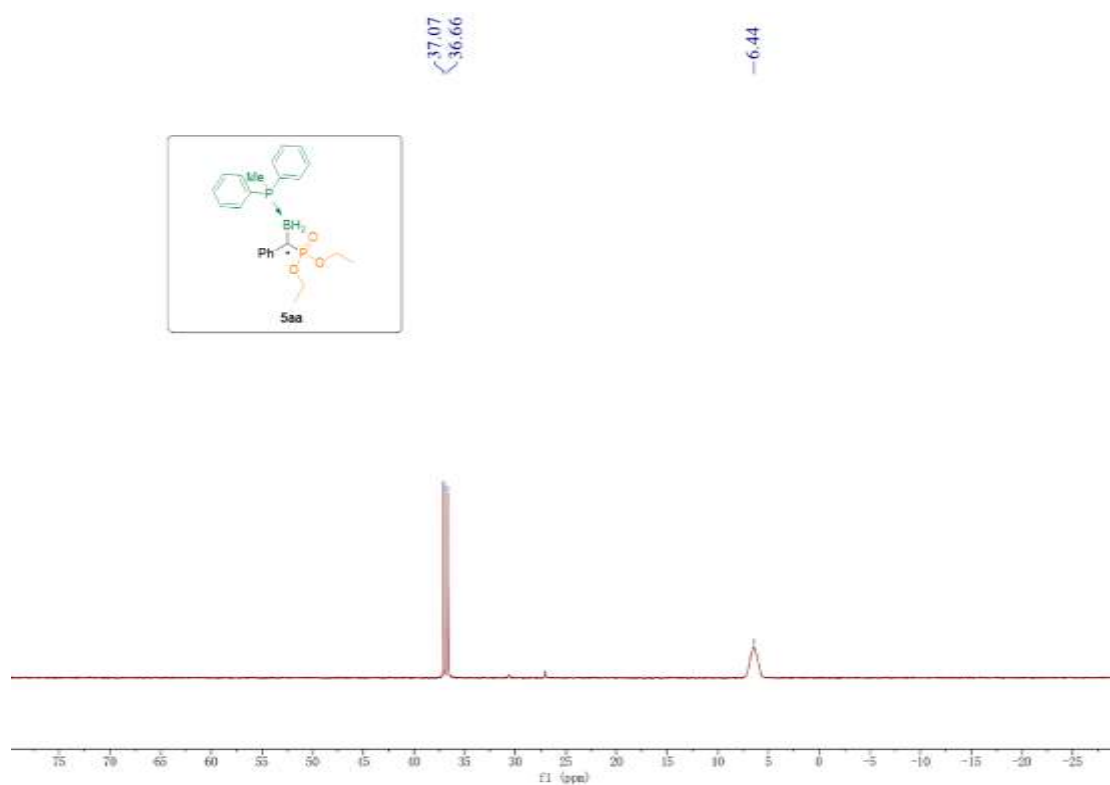

**(S)-diisopropyl(((methylphenylphosphane)boryl)(phenyl)methyl)phosphonate(5ba)**

**<sup>1</sup>H NMR (400 MHz, Chloroform-*d*)**

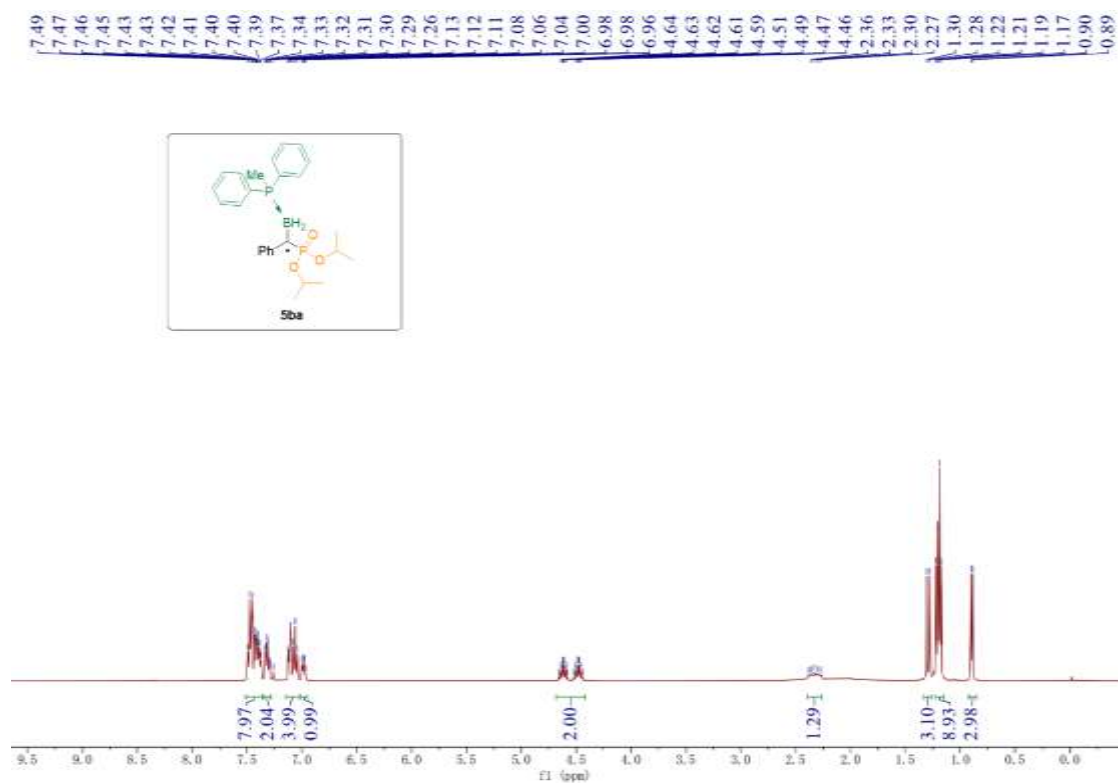

**<sup>13</sup>C NMR (101 MHz, Chloroform-*d*)**

142.52, 142.47, 142.44, 142.39, 131.96, 131.88, 131.76, 131.67, 131.08, 131.05, 130.88, 130.85, 130.30, 129.72, 129.66, 129.58, 128.83, 128.74, 128.62, 128.52, 128.40, 127.86, 127.64, 124.60, 124.57, 77.32, 77.00, 76.68, 69.62, 69.55, 68.98, 68.90, 24.33, 24.30, 24.10, 24.07, 23.94, 23.89, 23.30, 23.24, 9.52, 9.16

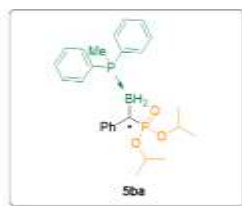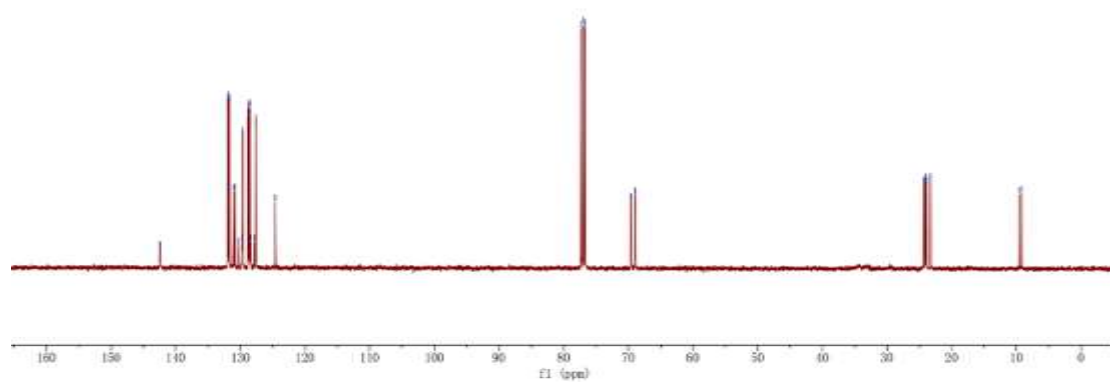

**<sup>11</sup>B NMR (128 MHz, Chloroform-*d*)**

-25.90

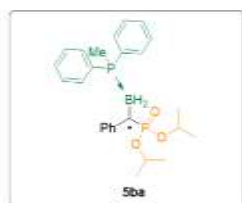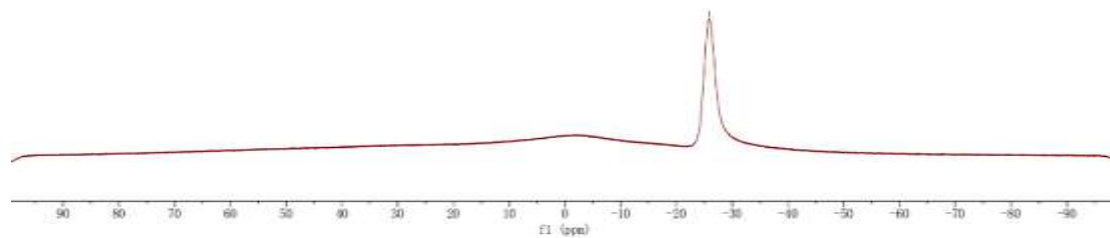



<sup>31</sup>P NMR (162 MHz, Chloroform-*d*)

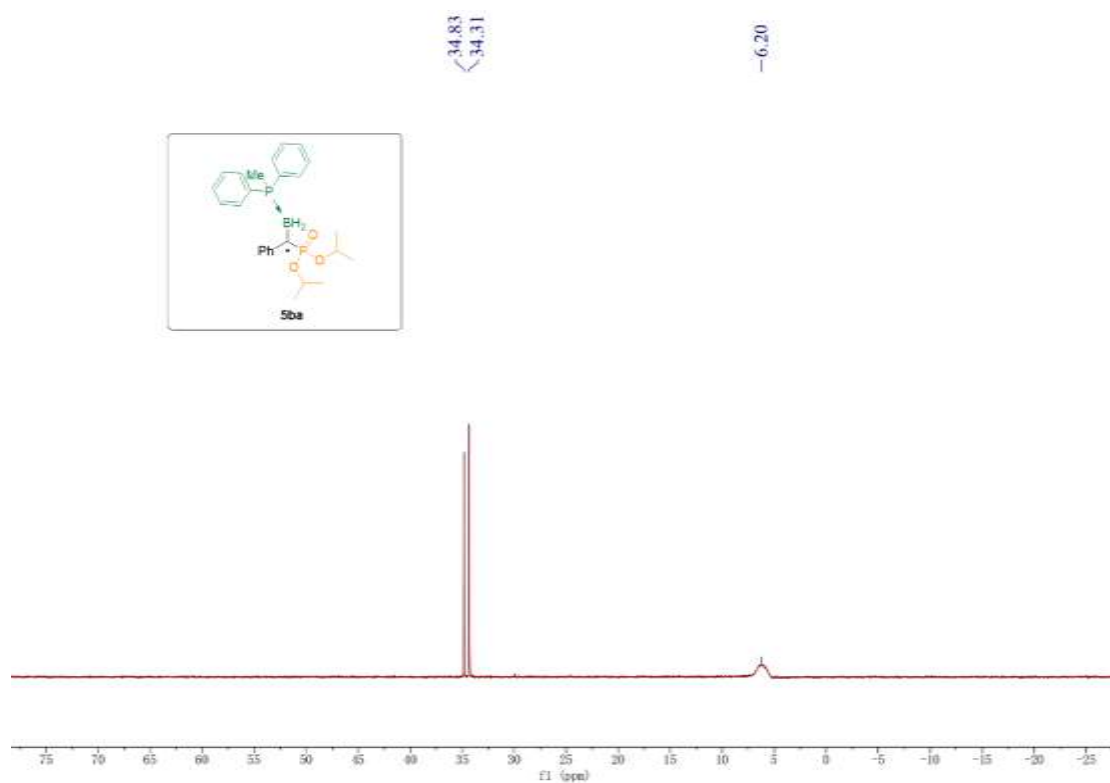

(*S*)-diethyl(((methylphenylphosphane)boryl)(phenyl)methyl)phosphonate(5ca)

<sup>1</sup>H NMR (400 MHz, Chloroform-*d*)

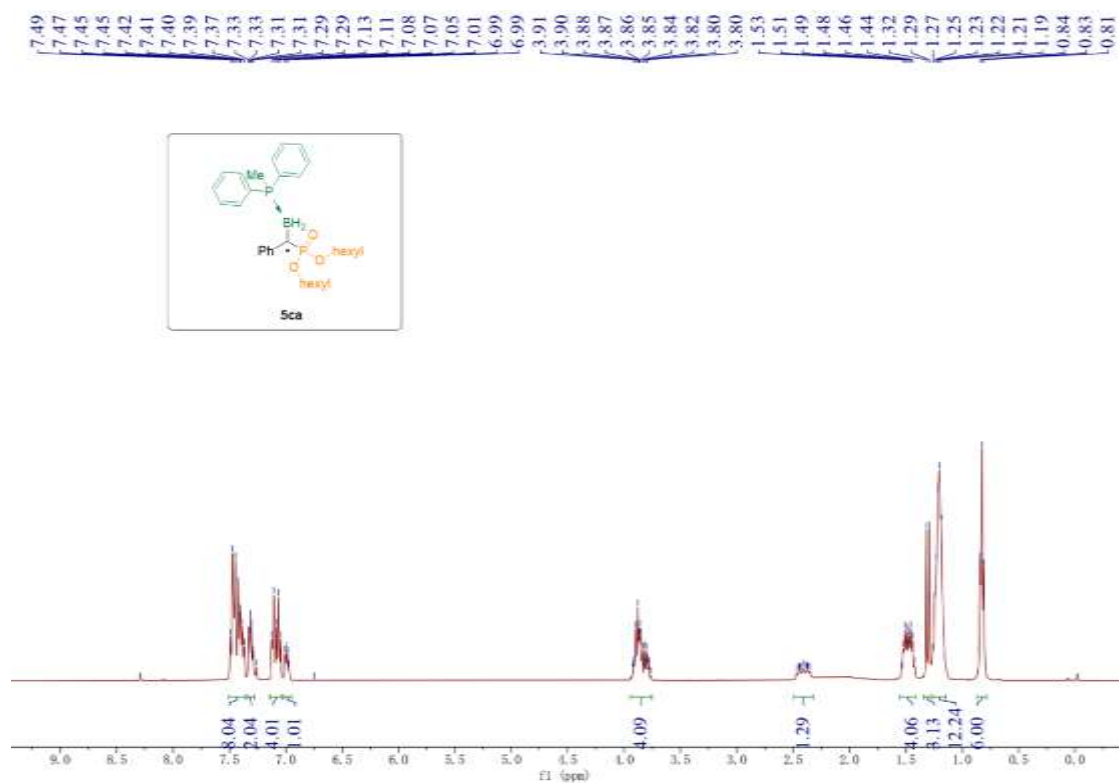

**<sup>13</sup>C NMR (101 MHz, Chloroform-*d*)**

142.01  
141.95  
141.92  
141.87  
131.91  
131.82  
131.72  
131.63  
131.10  
131.08  
130.91  
130.88  
130.13  
129.56  
129.53  
129.45  
128.84  
128.74  
128.62  
128.52  
128.32  
127.77  
127.73  
127.70  
124.77  
124.74  
77.32  
77.00  
76.68  
65.80  
65.73  
65.22  
65.15  
31.29  
30.49  
30.43  
25.08  
25.05  
22.43  
22.41  
13.88  
9.46  
9.10

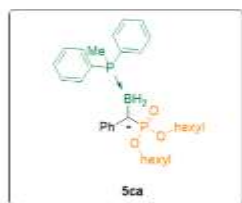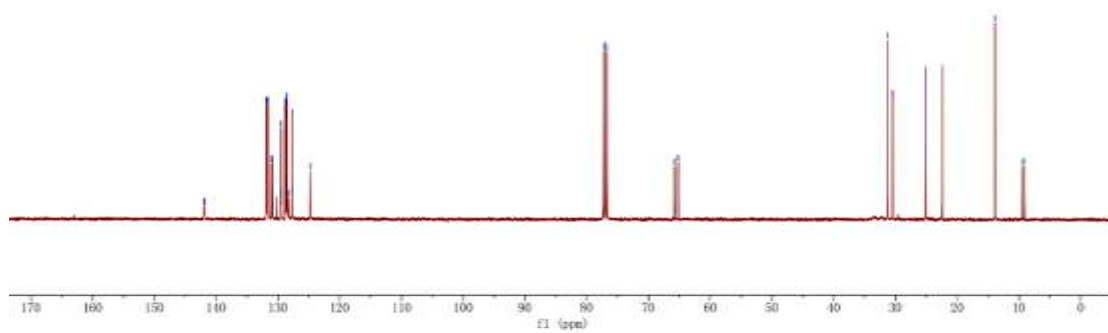

**<sup>11</sup>B NMR (128 MHz, Chloroform-*d*)**

-25.97

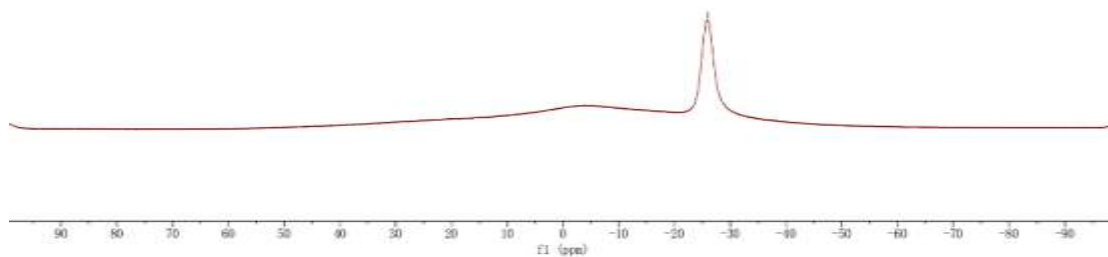

**<sup>31</sup>P NMR (162 MHz, Chloroform-*d*)**

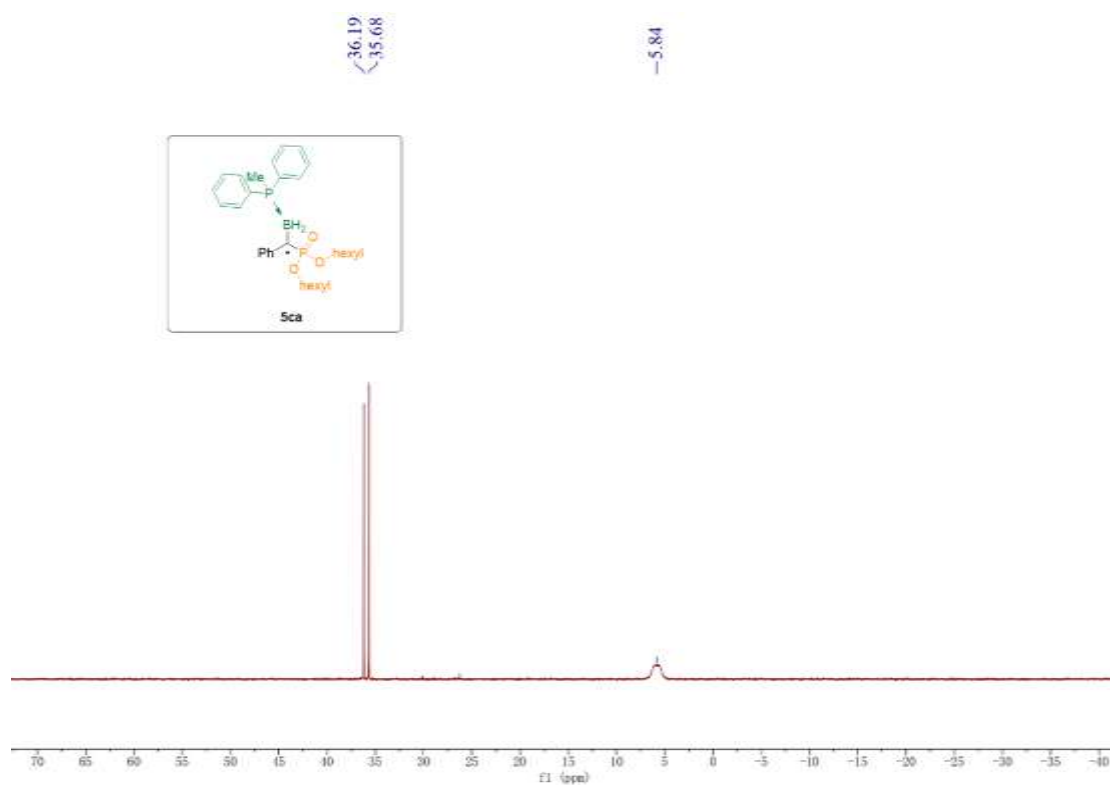

**(S)- ((methylidiphénylphosphane-boryl)(4-bromophényl)methyl) diphenylphosphine oxide (6a)**

**<sup>1</sup>H NMR (500 MHz, Chloroform-*d*)**

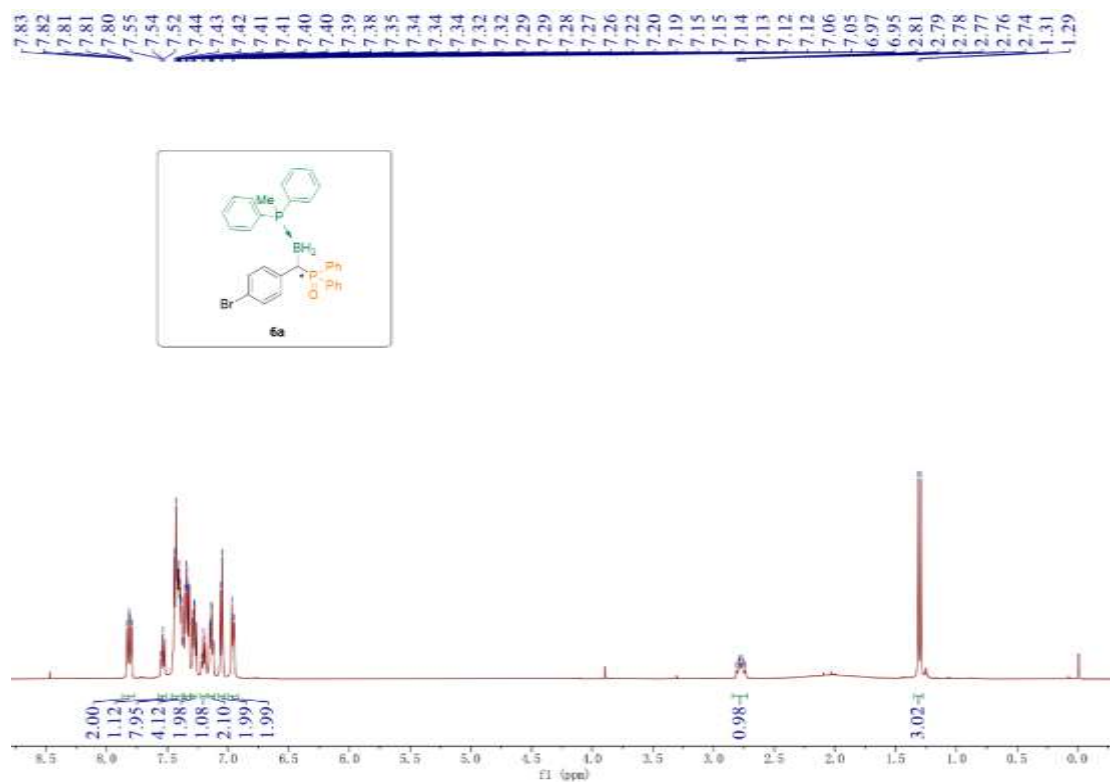

**<sup>13</sup>C NMR (126 MHz, Chloroform-*d*)**

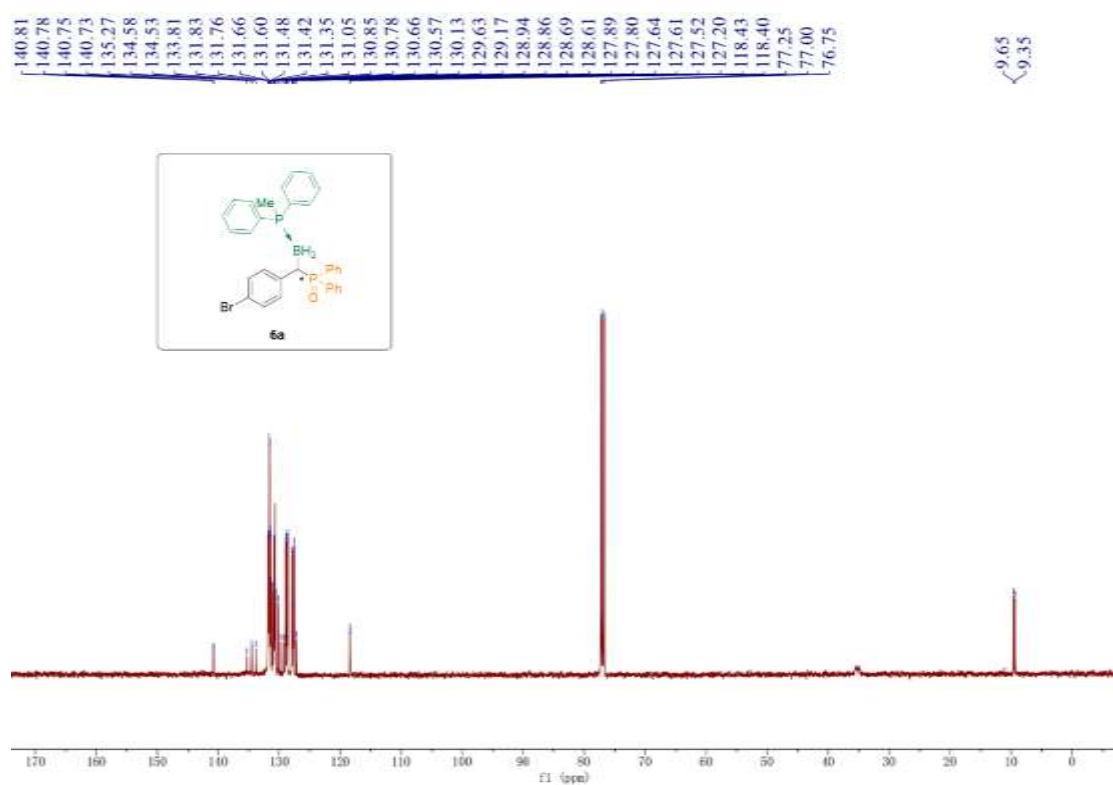

**<sup>11</sup>B NMR (160 MHz, Chloroform-*d*)**

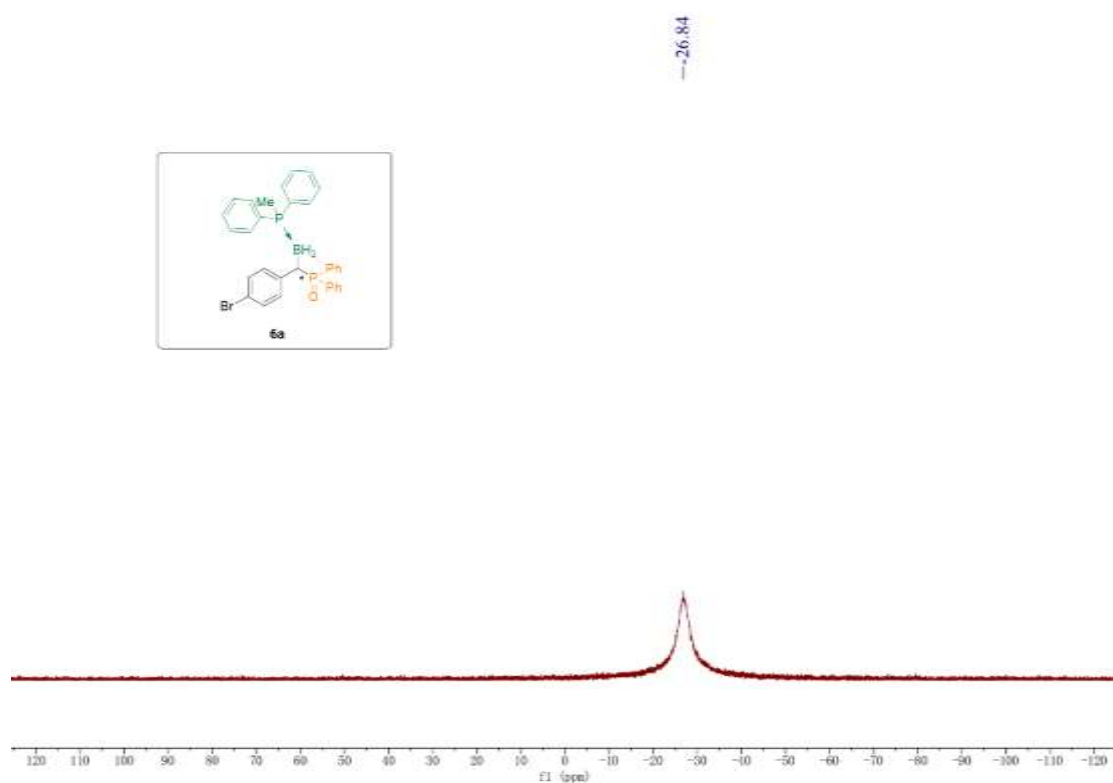

**<sup>31</sup>P NMR (162 MHz, Chloroform-*d*)**

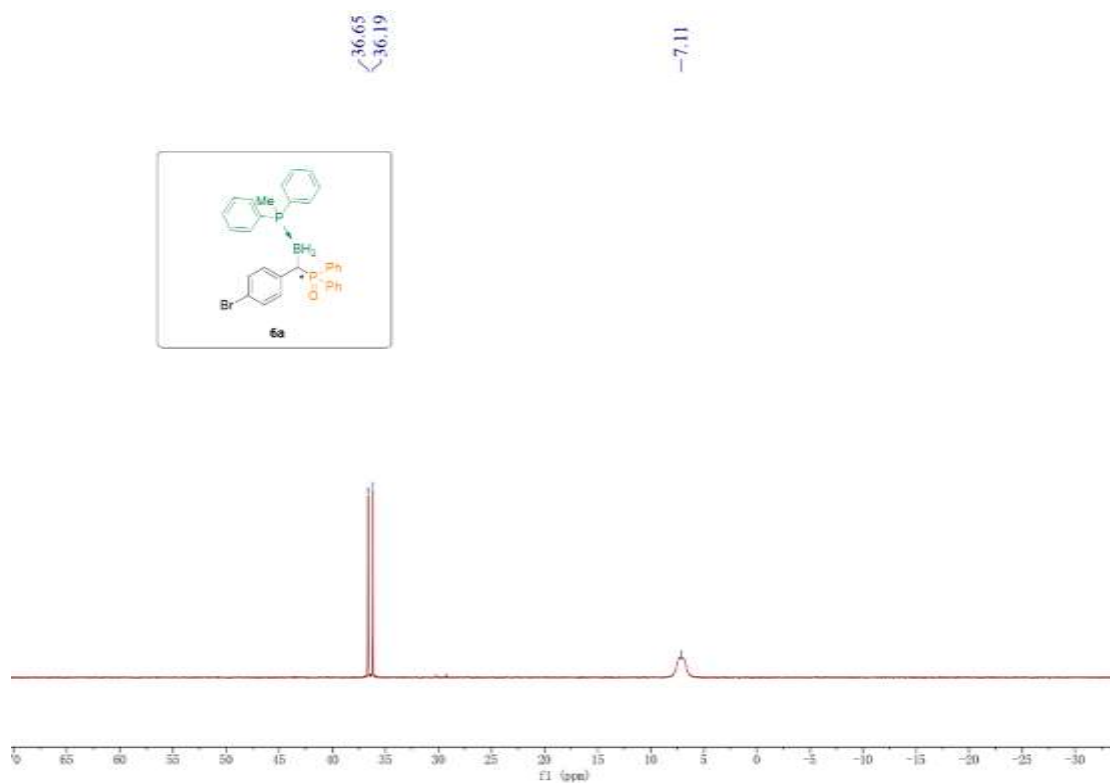

**(S)- ((methylphenylphosphane-boryl)(4-bromophenyl)methyl) diphenylphosphane-borane (6b)**

**<sup>1</sup>H NMR (400 MHz, Chloroform-*d*)**

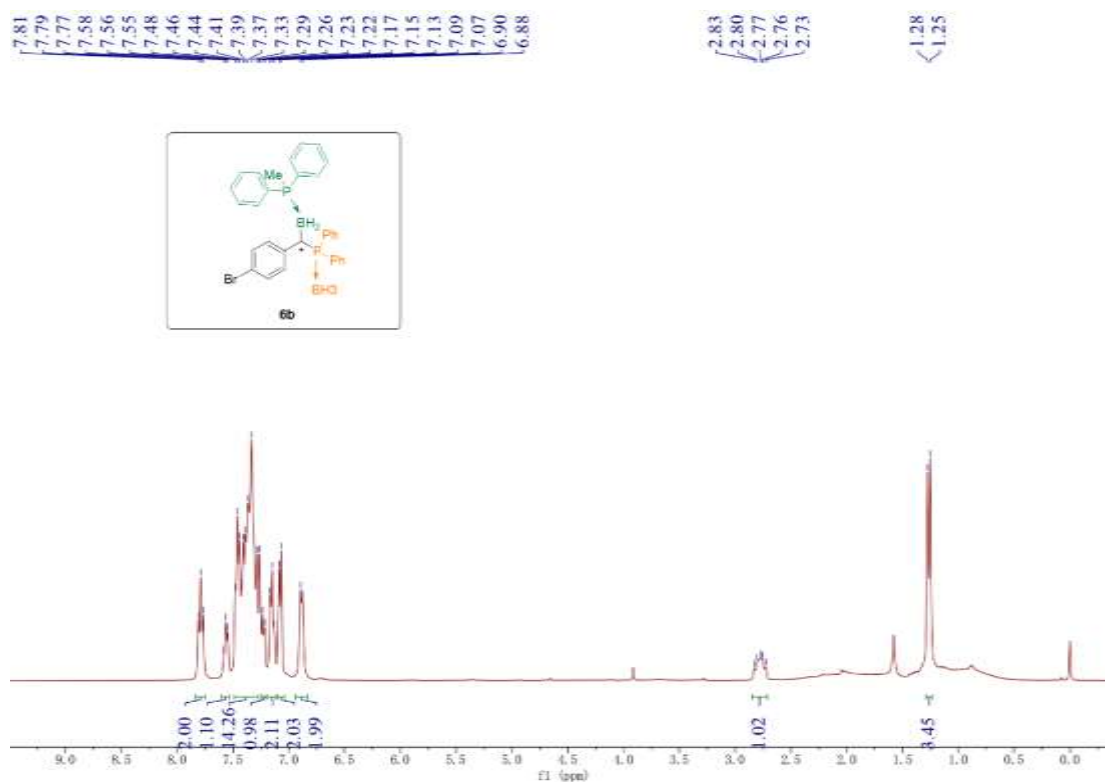



**<sup>31</sup>P NMR (202 MHz, Chloroform-*d*)**

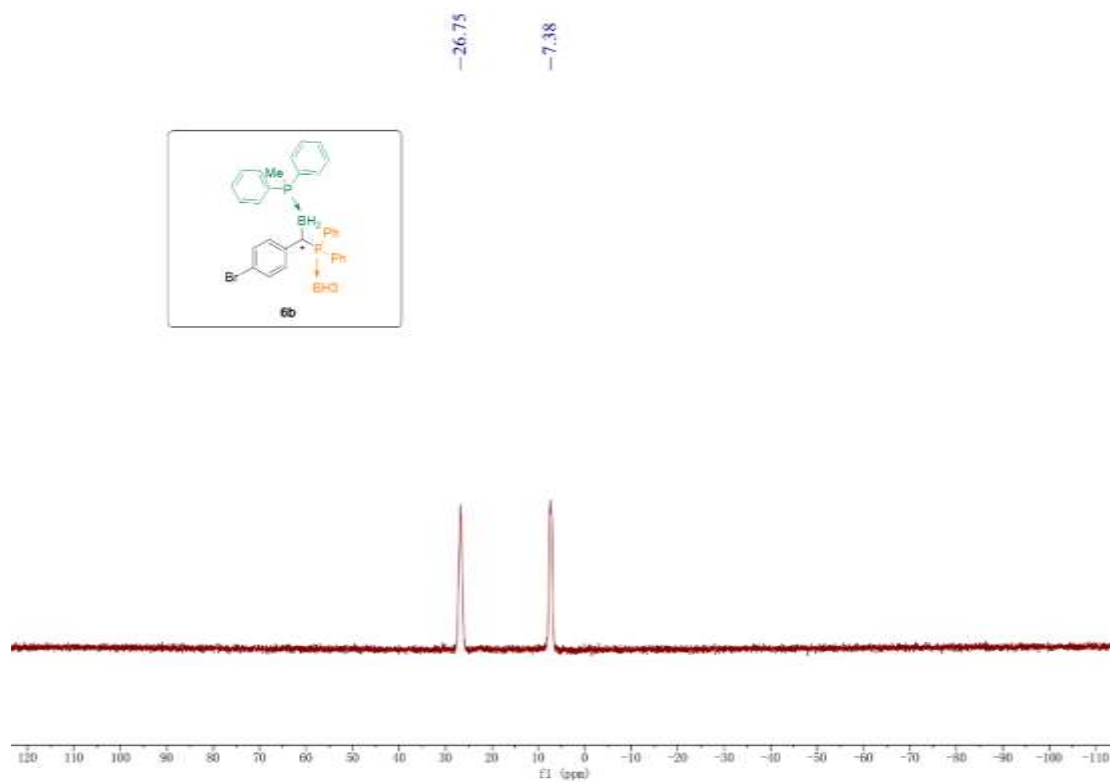

**(S)-Dimethyl ([1,1'-biphenyl]-4-yl(hydroxy)methyl)phosphonate(6c)**

**<sup>1</sup>H NMR (400 MHz, Chloroform-*d*)**

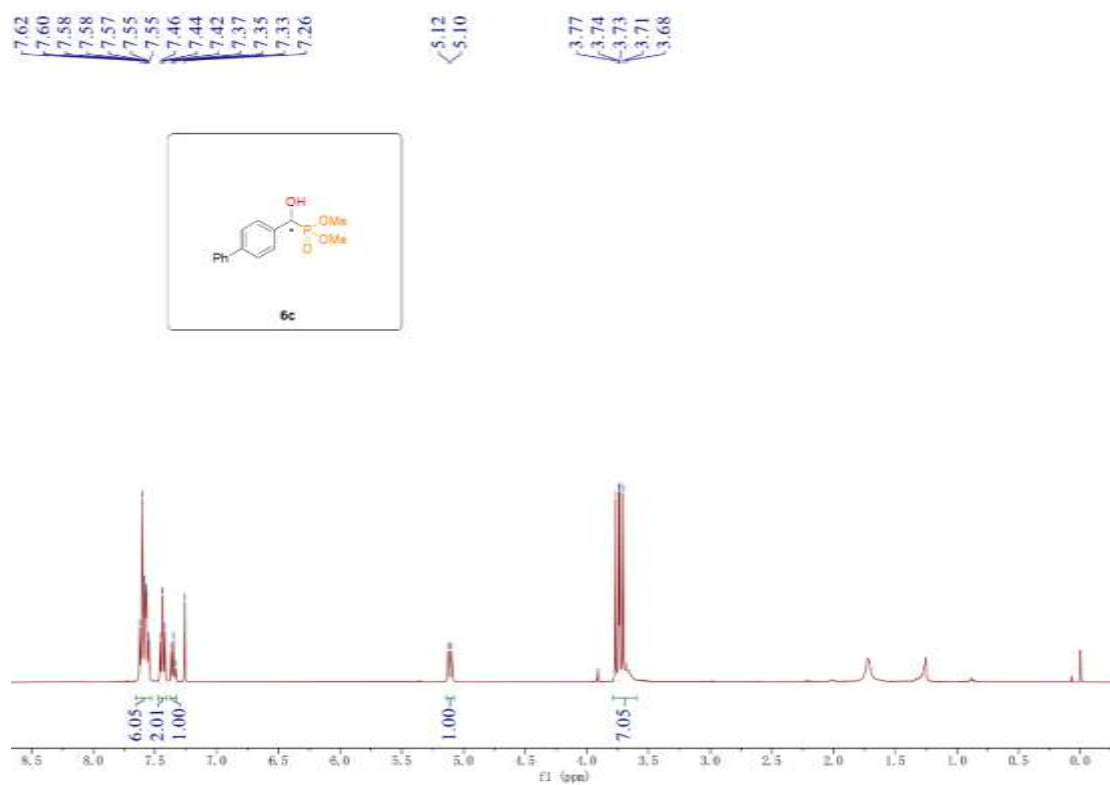

**<sup>13</sup>C NMR (101 MHz, Chloroform-*d*)**

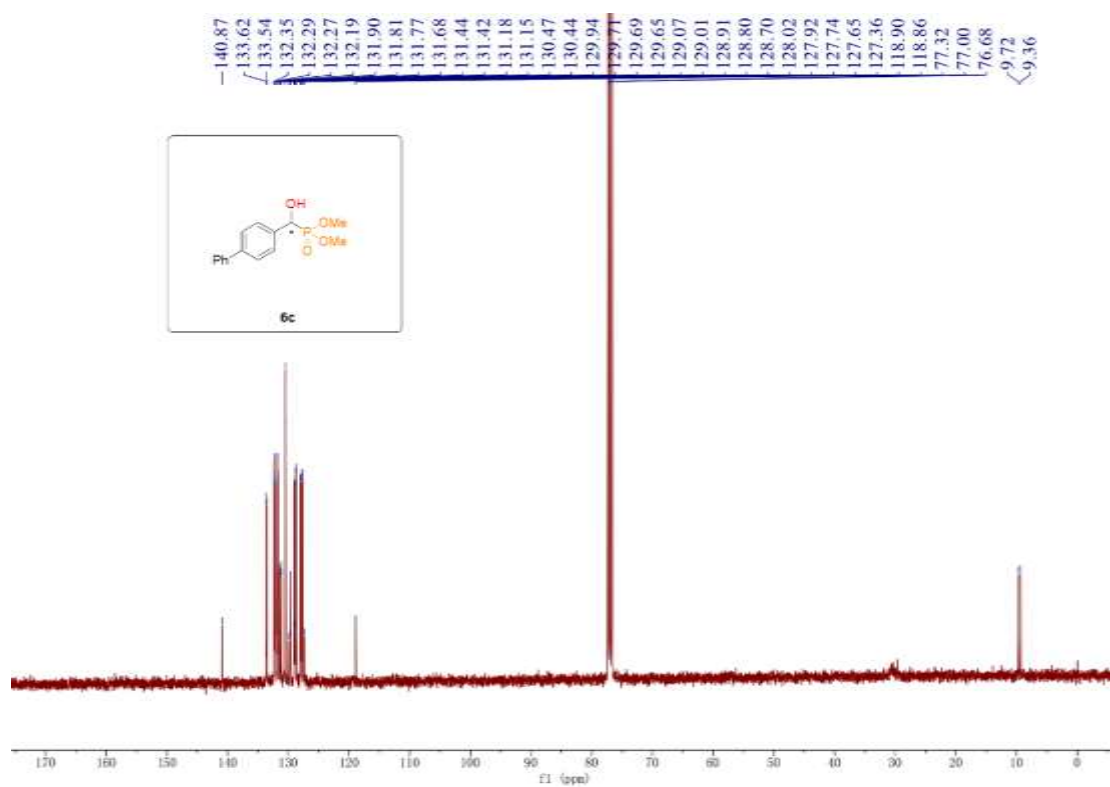

**<sup>31</sup>P NMR (162 MHz, Chloroform-*d*)**

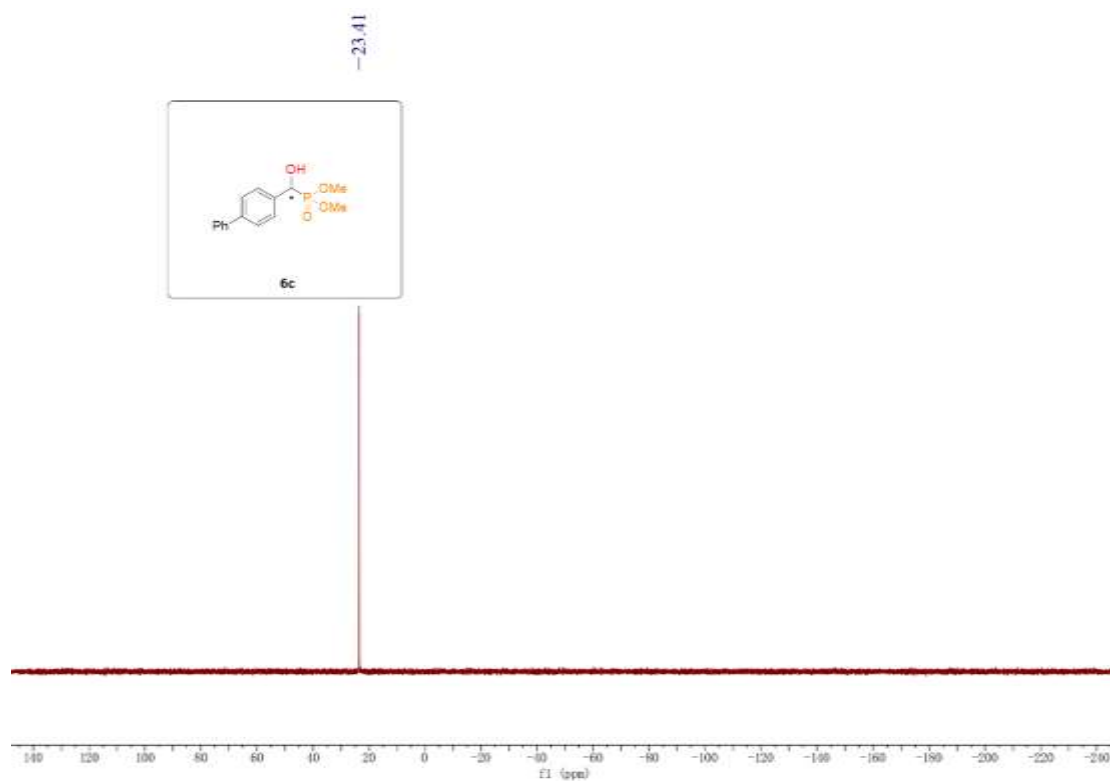



# Dimethyl ([1,1'-biphenyl]-4-ylmethyl-d)phosphonate(6d)

<sup>1</sup>H NMR (400 MHz, Chloroform-*d*)

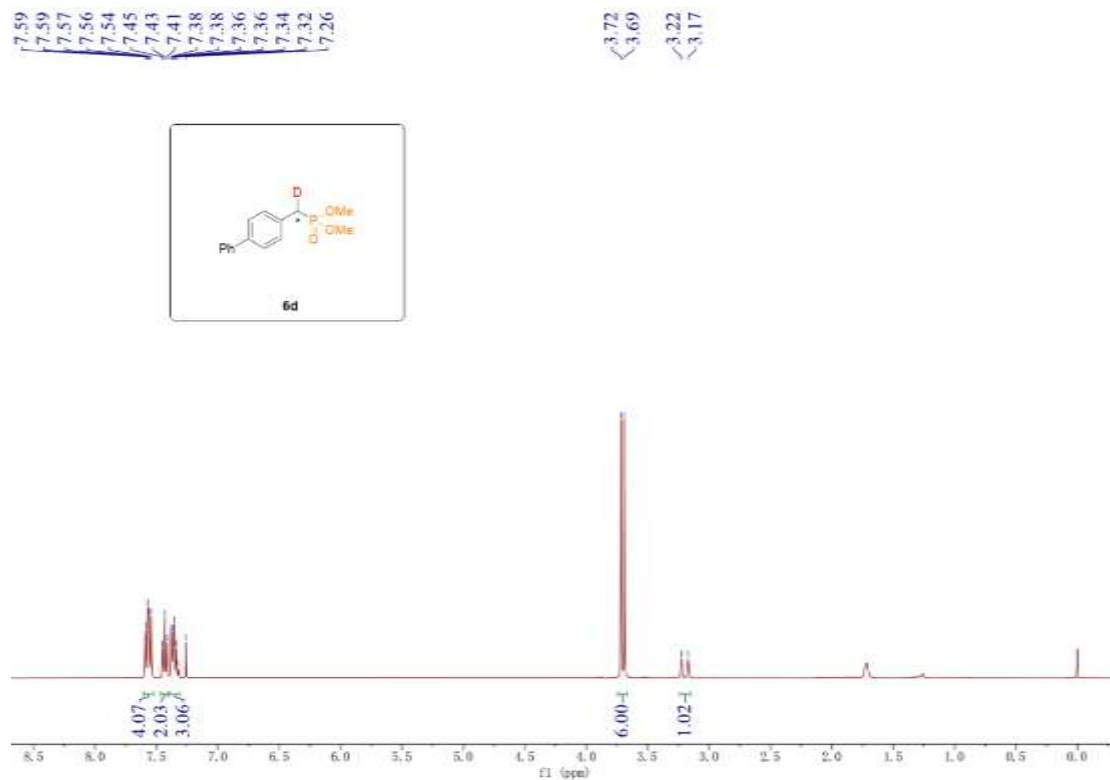

<sup>13</sup>C NMR (101 MHz, Chloroform-*d*)

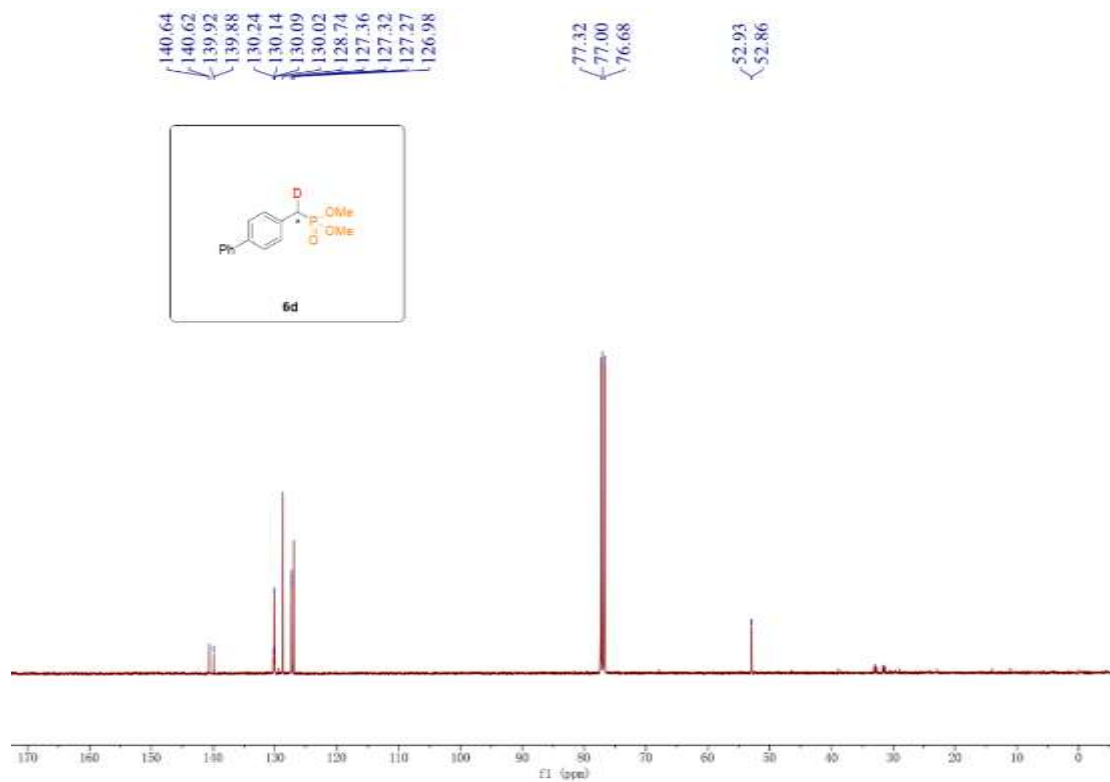

**<sup>31</sup>P NMR (162 MHz, Chloroform-*d*)**

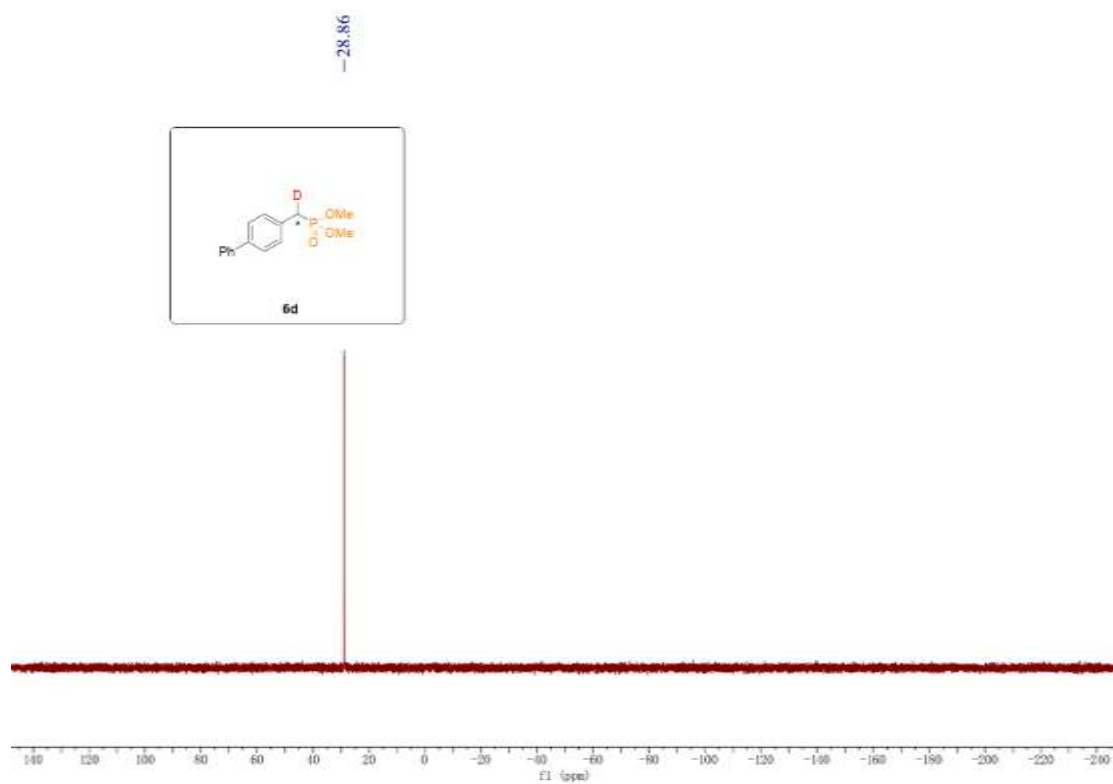

Supplement: d4sc01271b1.pdf [file d4sc01271b1.pdf]
